# Supplementary material for: The Amyloid Plaque Proteomes of Alzheimer’s Disease and Mild Cognitive Impairment
Source: Research Square preprint supplement (doi:10.21203/rs.3.rs-9012095/v1), 2026-03-08

**Supplementary Materials**

**The Amyloid Plaque Proteomes of Alzheimer’s Disease and Mild Cognitive Impairment**

Authors: Dominique Leitner1,2, Evgeny Kanshin3, Kaleah Balcomb4, Manor Askenazi5, Jianina I. Suazo1, Mitchell Marta-Ariza1, Julie Schneider6,7,8, Beatrix Ueberheide1,3 Eleanor Drummond1,4, Thomas Wisniewski1,9

Affiliations:

1Center for Cognitive Neurology, Department of Neurology, New York University Grossman School of Medicine, New York, NY 10016, USA
2Comprehensive Epilepsy Center, Department of Neurology, New York University Grossman School of Medicine, New York, NY 10016, USA

3Proteomics Laboratory, Division of Advanced Research Technologies and Department of Biochemistry and Molecular Pharmacology, New York University Grossman School of Medicine, New York, NY 10016, USA

4Brain and Mind Centre and School of Medical Sciences, University of Sydney, Camperdown, NSW, 2050, Australia

5Biomedical Hosting LLC, Arlington, MA 02140, USA

6Department Rush Alzheimer’s Disease Center, Rush University Medical Center, 1750 W Harrison Street, Suite 1000, Chicago, IL 60612, USA

7Department of Neurological Sciences, Rush University Medical Center, Chicago, IL, USA

8Department of Pathology, Rush University Medical Center, Chicago, IL, USA

9Departments of Pathology and Psychiatry, New York University Grossman School of Medicine, New York, NY 10016, USA

**Supplementary Figure Legends**

**Supplementary Figure 1. Top plaque proteins in MCI and AD. a-i)** The top 10 significantly enriched proteins in MCI include those depicted as well as the Aβ peptide. Proteins are indicated by decreasing significance. **j-l)** The top 10 significantly enriched proteins in AD included 7 of these same proteins from MCI as well as PBXIP1, CAPG, and LRP1 (PTN, CLU, MDK were not among the top 10 in AD but were also significantly enriched).

**Supplementary Figure 2.** **TMEFF2 histological characterization of CAA. a)** Quantification of CAA vessels (4G8 positive) in temporal cortex sections from progressive stages of disease, Control (n = 12), Preclinical AD (n = 10), MCI (n = 12), and AD (n = 12), showed enrichment for 4G8 in vessels of MCI and AD cases. **b)** Quantification of TMEFF2 immunoreactive area in CAA vessels, showed enrichment for TMEFF2 in CAA vessels of AD cases. **c)** Representative images show TMEFF2 immunoreactivity at progressive stages of disease in CAA and plaque tissue. Significant pairwise comparisons are indicated for those analyses that were performed, * p < 0.05, ** p < 0.01. Scale bar 200 um.

**Supplementary Tables**

Supplementary Table 1. Detailed Case History

Supplementary Table 2. LC-MS/MS Data and T-tests

Supplementary Table 3. GO Terms MCI Plaque vs MCI Non-Plaque

Supplementary Table 4. GO Terms AD Plaque vs AD Non-Plaque

Supplementary Table 5. GO Terms MCI Non-Plaque vs Control Non-Plaque

Supplementary Table 6. GO Terms AD Non-Plaque vs Control Non-Plaque

Supplementary Table 7. Plaque and NeuroPro Proteome Comparison - Previously Unreported Proteins

Supplementary Table 8. Plaque vs GNPC Biofluid Proteome Comparison

Supplementary Table 9. WGCNA GO anRichment Analysis Control Non-Plaque

Supplementary Table 10. WGCNA GO anRichment Analysis MCI Plaque

Supplementary Table 11. WGCNA GO anRichment Analysis MCI Non-Plaque

Supplementary Table 12. WGCNA GO anRichment Analysis AD Plaque

Supplementary Table 13. WGCNA GO anRichment Analysis AD Non-Plaque

**Supplementary Figure 1.**

**
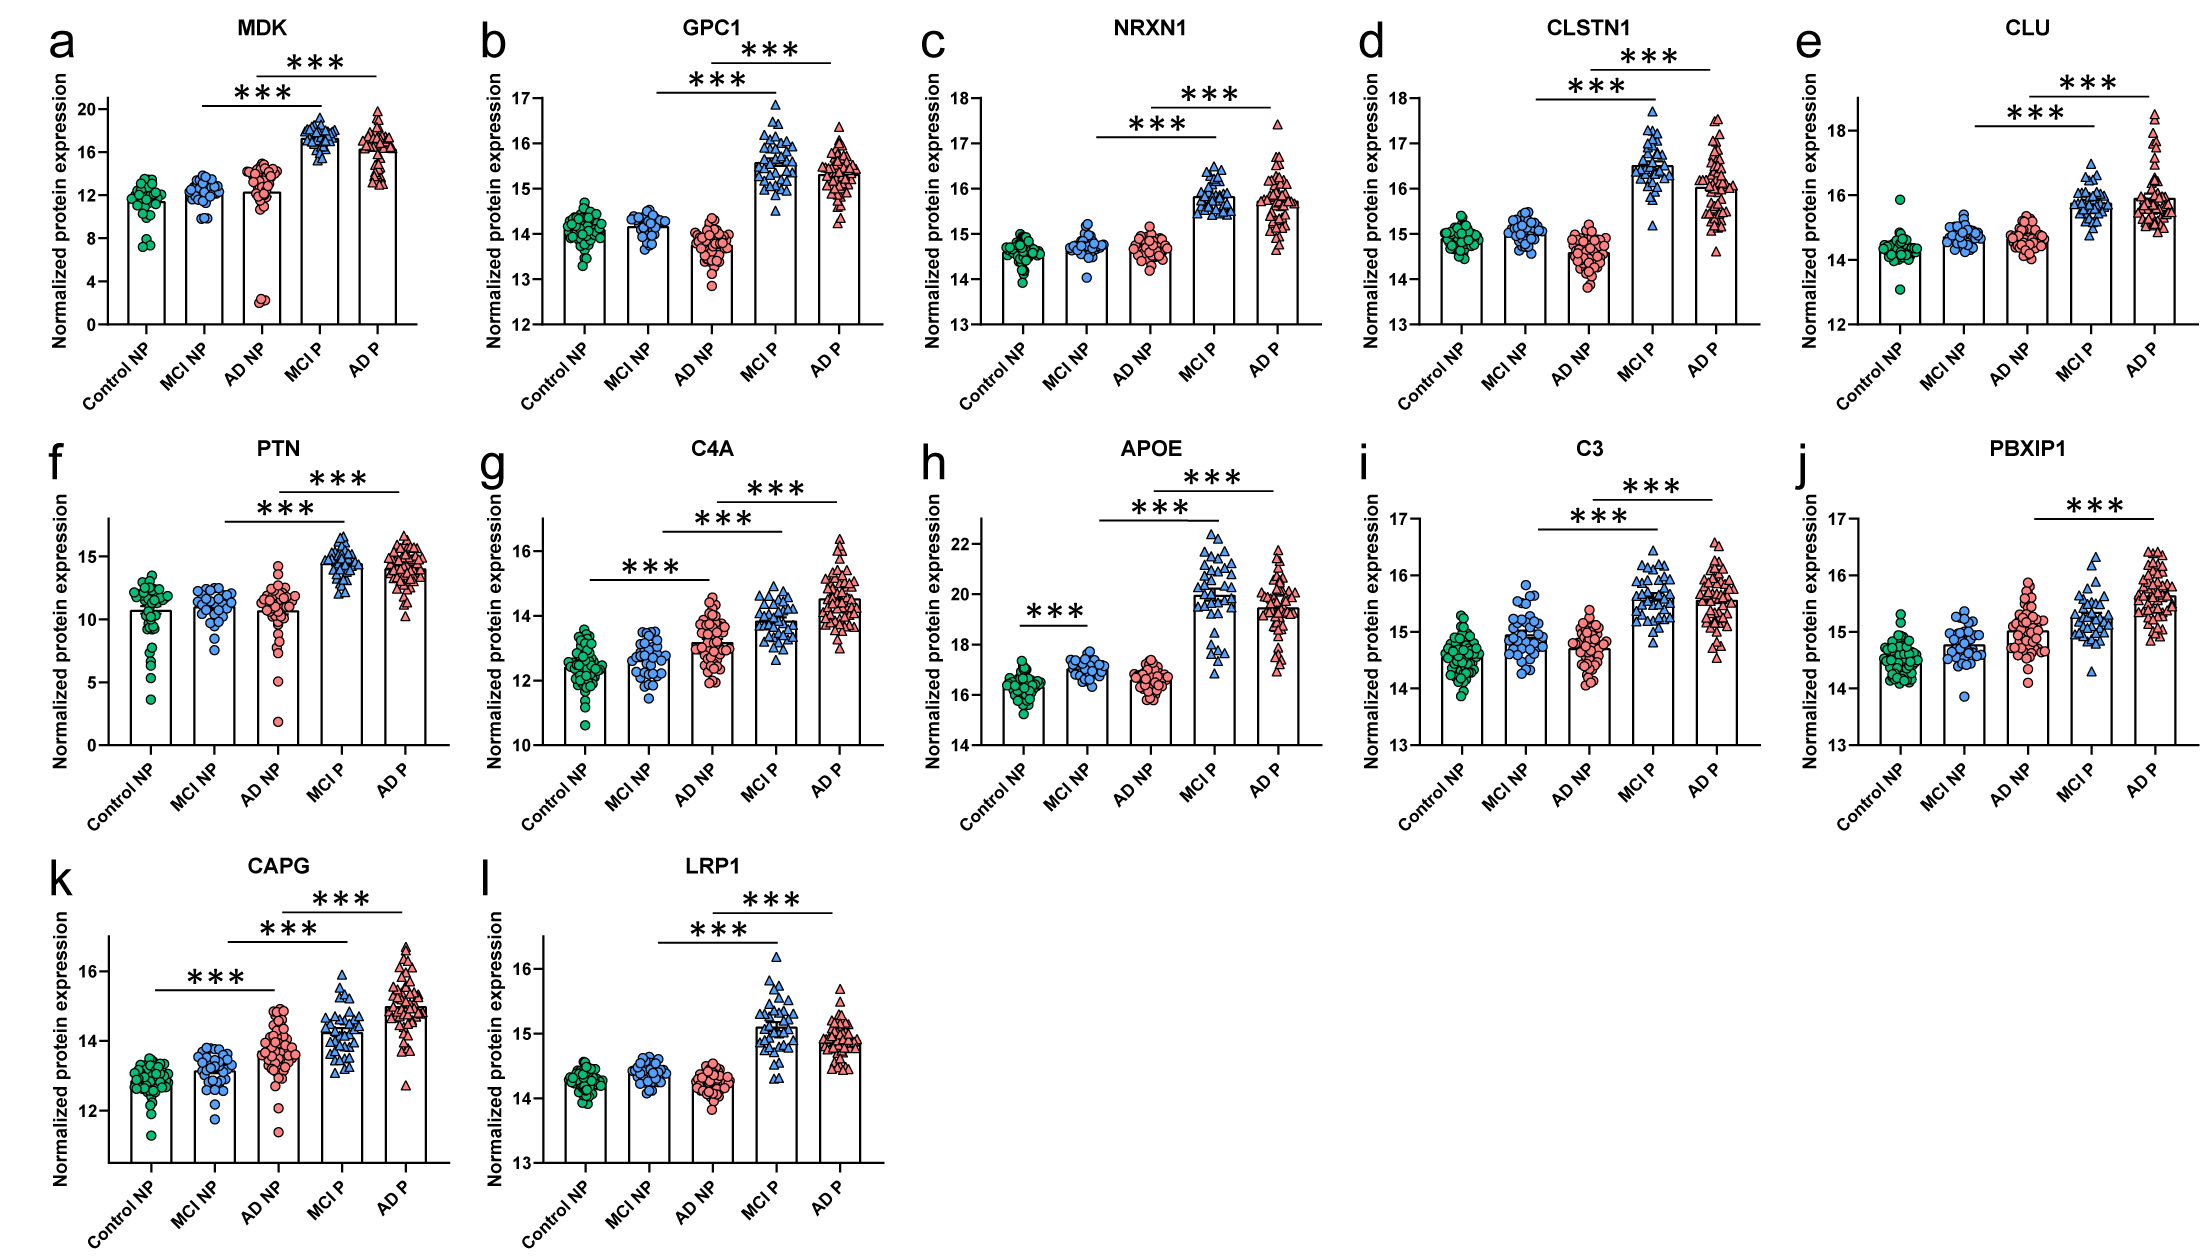
**

**Supplementary Figure 2.**


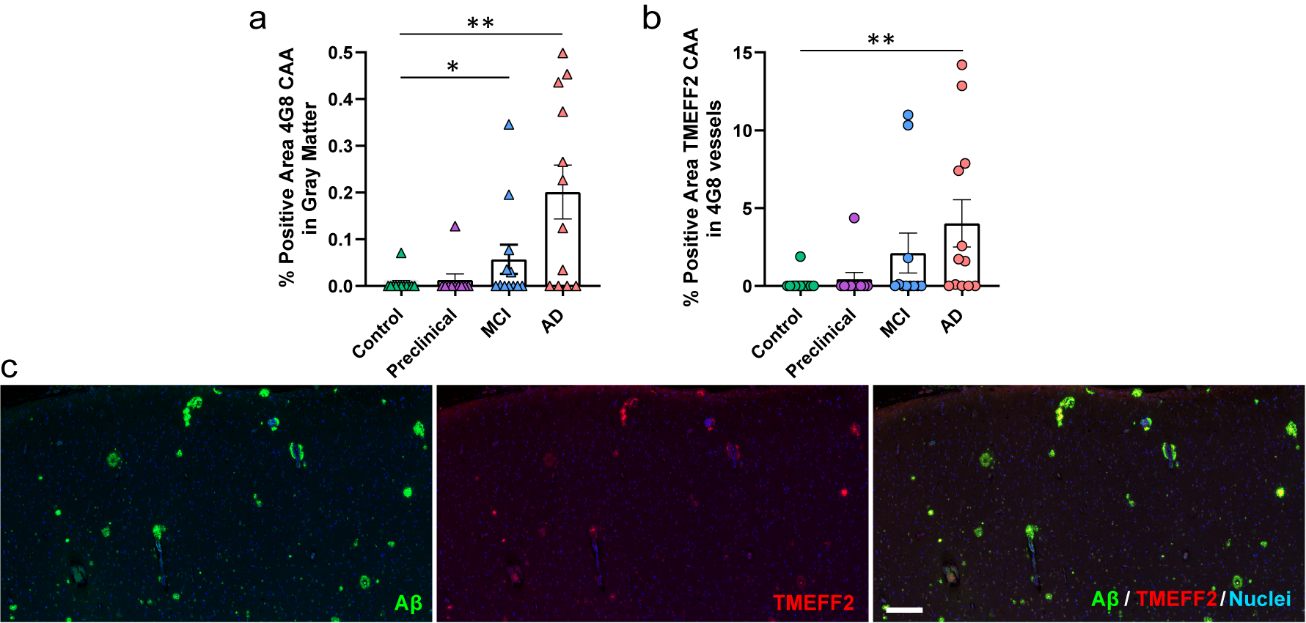

Supplement: Supplementary file 1 [file 934c537a6f8e905e8bed084d.docx]
