# Supplementary material for: The Amyloid Plaque Proteomes of Alzheimer’s Disease and Mild Cognitive Impairment
Source: Research Square preprint supplement (doi:10.21203/rs.3.rs-9012095/v1), 2026-03-08
Supplement: Supplementary file 2 [file ec86bf51fd63273e01efc25b.xlsx]

## Sheet: Table of Contents
Table of Contents
Supplementary Table 1. Detailed Case History
Supplementary Table 2. LC-MS/MS Data and T-tests
Supplementary Table 3. GO Terms MCI Plaque vs MCI Non-Plaque
Supplementary Table 4. GO Terms AD Plaque vs AD Non-Plaque
Supplementary Table 5. GO Terms MCI Non-Plaque vs Control Non-Plaque
Supplementary Table 6. GO Terms AD Non-Plaque vs Control Non-Plaque
Supplementary Table 7. Plaque and NeuroPro Proteome Comparison - Previously Unreported Proteins
Supplementary Table 8. Plaque vs GNPC Biofluid Proteome Comparison
Supplementary Table 9. WGCNA GO anRichment Analysis Control Non-Plaque
Supplementary Table 10. WGCNA GO anRichment Analysis MCI Plaque
Supplementary Table 11. WGCNA GO anRichment Analysis MCI Non-Plaque
Supplementary Table 12. WGCNA GO anRichment Analysis AD Plaque
Supplementary Table 13. WGCNA GO anRichment Analysis AD Non-Plaque

## Sheet: Supplementary Table 1
Supplementary Table 1. Detailed Case History
Group	Age	Sex	PMI	Regional Aβ plaques (score 0-5)	Regional CAA (score 0-5)	Regional Perivascular Aβ (+,++,+++)	Regional Intravascular Aβ in vessel walls (+,++,+++)	Case ID	Analysis Performed	Study	APOE Genotype	Final Consensus Cognitive Diagnosis (1 = none; 2 = MCI and no other cause; 3 = MCI and another cause; 4 = AD and no other cause)	Diagnosis of Stroke or other cerebrovascular event (1 = Yes, 2 = No)	Diagnosis of Parkinson's disease (2 = no)	Education (years)	Race (1 = white; 3 = native american)	Spanish/Hispanic/Latino origin (2 = no)	ABC Score: A 0-3	ABC Score: B 0-3	ABC Score: C 0-3	Braak Stage 0-6	CERAD Score 1-4	NIH-Reagan Diagnosis (1 = high; 2 = intermediate; 3 = low; 4 = no AD)	Lewy Body disease (0 = none; 1 = nigral; 2 = limbic; 3 = neocortical)	TDP-43 pathology (0 = none, 1 = amygdala; 2 = amygdala+limbic; 3 = amygdala+limbic+neocrotical)	Arteriolosclerosis Score 0-3	Cerebral Atherosclerosis Score 0-3	Cerebral Infarction - Gross (0 = none; 1 = one or more)	Cerebral Infarction - Micro (0 = none; 1 = one or more)
Control	95.4853	F	13.4167	0	0			B14106	Proteomics	ROS	23	1	2	2	16	1	2	1	2	2	3	2	2	0	0	2	1	0	0
Control	90.4449	F	5.11667	0	0			B16080	Proteomics	MAP	33	1	1	2	19	1	2	0	1	0	2	4	3	3	0	1	1	1	0
Control	91.5318	M	16.7	0	0			B16105	Proteomics	ROS	33	1	2	2	13	1	2	0	1	0	2	4	3	0	1	0	1	0	1
Control	71.1513	F	16.3	0	0			B17061	Proteomics	MAP	33	1	2	2	14	1	2	1	1	1	1	3	3	0	0	0	0	0	0
Control	95.1348	F	5.58333	0	0			B17100	Proteomics	MAP	33	1	1	2	13	1	2	1	0	0	0	4	4	0	0	0	1	1	0
Control	94.9788	F	8.23333	0	0			B19013	Proteomics	MAP	33	1	2	2	14	1	2	1	1	0	2	4	3	0	0	0	1	0	0
Control	82.6585	F	36.9	0	0			B19041	Proteomics	MAP	33	1	1	2	13	2	2	1	1	0	2	4	3	0	0	0	0	0	1
Control	92.2245	F	7	0	0			B19059	Proteomics	MAP	33	1	2	2	15	1	2	1	1	0	2	4	3	0	1	3	2	1	0
Control	93.1472	F	4.33333	1	0			B07081	Proteomics	ROS	23	1	2	2	16	1	2	2	2	2	4	2	2	0	0	1	2	0	0
Control	81.2156	F	5.75	1	0			B08088	Proteomics	MAP	33	1	1	2	12	1	2	1	1	0	2	4	3	0	1	1	1	0	0
Control	88.6379	F	18.1667	1	0			B11053	Proteomics	MAP	23	1	1	2	20	1	2	0	1	0	2	4	3	0	1	2	2	1	0
Control	77.3142	F	5.83333	1	0			B13017	Proteomics	ROS	23	1	2	2	21	1	2	0	1	0	1	4	3	0	0	2	0	0	0
Control	80.9856	F	6.26667	1	0			B18119	Proteomics	MAP	33	1	2	2	18	1	2	1	1	1	2	3	3	0	0	0	1	0	0
Control	94.2806	M	7.41667	1	0			B19084	Proteomics	MAP	33	1	2	2	21	1	2	1	1	1	2	3	3	0	0	2	1	0	0
Control	69.6482	F	4.5	1	0			ROS270	Proteomics	ROS	33	1	2	2	16	2	2	1	1	0	1	4	3	2	1	2	1	0	0
Control	74.3518	M	7.5	1	1	++	+	B08042	Proteomics	MAP	34	1	2	2	13	1	1	1	1	1	2	3	3	0	0	2	1	0	1
Control	90.5079	M	15.1667	1	1	+		B12104	Proteomics	ROS	34	1	2	2	14	1	2	1	2	1	4	3	3	0	0	0	0	0	0
Control	92.0657	M	8.13333	1	1	++		B13032	Proteomics	MAP	34	1	1	2	23	1	2	1	1	0	1	4	3	0	0	2	1	1	1
Control	91.7974	M	6.86667	1	1	+	+	B13091	Proteomics	MAP	33	1	2	2	21	1	2	1	1	0	2	4	3	0	0	0	0	0	0
Control	94.089	F	10	1	1	+	+	B15067	Proteomics	ROS	23	1	2	2	21	1	2	1	1	1	2	3	3	0	3	1	0	0	0
Control	86.0424	F	6.25	0	0			B12115	Proteomics, DNAJA1 IHC	ROS	23	1	2	2	13	1	2	0	2	0	4	4	3	3	0	0	1	1	0
Control	81.3142	M	9.58333	0	0			B14109	Proteomics, DNAJA1 IHC	MAP	33	1	2	2	16	1	2	0	1	0	2	4	3	0	0	0	1	0	0
Control	91.0637	M	16.8333	0	0			B17060	Proteomics, DNAJA1 IHC	ROS	33	1	2	2	20	1	2	0	1	0	2	4	3	0	0	0	0	1	1
Control	97.1964	F	15.0333	0	0			B17093	Proteomics, DNAJA1 IHC	ROS	34	1	2	2	21	1	2	1	1	0	2	4	3	0	2	0	1	0	0
Control	89.9767	F	24	0	0			B18036	Proteomics, DNAJA1 IHC	ROS	23	1	2	2	18	1	2	0	2	0	4	4	3	0	0	0	0	0	1
Control	87.6085	M	21	0	0			B18062	Proteomics, HTRA1 IHC, DNAJA1 IHC	ROS	23	1	2	2	23	1	2	0	1	0	1	4	3	0	0	2	1	1	1
Control	89.3498	F	9.1	0	0			B18091	Proteomics, DNAJA1 IHC	MAP	33	1	2	2	16	1	2	0	1	0	2	4	3	0	0	0	0	0	0
Control	100.969	M	98.3167	0	0			B18120	Proteomics, DNAJA1 IHC	MAP	23	1	2	2	12	1	2	0	1	0	2	4	3	0	1	1	1	0	1
Control	88.5257	F	15.2333	0	0			B19061	Proteomics, HTRA1 IHC, DNAJA1 IHC	MAP	33	1	2	2	12	1	2	0	1	0	2	4	3	0	3	0	0	0	0
Control	90.2067	F	7.5	1	0			B14066	Proteomics, DNAJA1 IHC	MAP	34	1	1	2	15	1	2	0	1	0	2	4	3	0	2	2	2	0	0
Control	72.8268	M	4.66667	1	1	+++	+	B04024	Proteomics, DNAJA1 IHC	MAP	23	1	2	2	16	1	2	1	1	0	1	4	3	0	0	1	1	0	0
Control	92.8652	F	3.91667	1	1	++	+	B06059	Proteomics, DNAJA1 IHC	ROS	23	2	1	2	16	1	2	0	2	0	3	4	3	2	0	2	2	1	0
Control	76.386	M	4.83333	1	1	++	+	B08040	Proteomics, DNAJA1 IHC	MAP	33	1	2	2	12	1	2	1	0	0	0	4	4	0	3	0	1	0	0
Control	87.9425	F	20	1	1	+	+	B14027	Proteomics, DNAJA1 IHC	ROS	34	1	2	2	18	1	2	0	2	0	3	4	3	3	0	1	0	0	0
Control	82.7159	F	6.58333	1	1	+	+	B15057	Proteomics, DNAJA1 IHC	MAP	33	1	2	2	14	1	2	0	1	0	2	4	3	0	0	0	0	0	0
Control	93.5524	F	3.91667	1	1	+	+	B15092	Proteomics, DNAJA1 IHC	ROS	34	1	2	2	16	1	2	0	2	0	4	4	3	0	1	1	1	0	0
Control	89.2813	F	5.41667	1	1	+	+	B16026	Proteomics, DNAJA1 IHC	ROS	23	1	2	2	18	1	2	1	2	0	3	4	3	0	1	0	1	0	0
Control	88.1314	M	12.2333	1	1	+	+	B17029	Proteomics, DNAJA1 IHC	ROS	23	1	2	2	18	1	2	0	2	0	3	4	3	0	1	0	2	0	0
Control	86.0424	M	7.08333	1	1	+	++	B17123	Proteomics, HTRA1 IHC, DNAJA1 IHC	ROS	34	1	2	2	20	1	2	2	2	2	4	2	2		0	2	1	0	1
Control	87.488	M	13.6167	1	1	+	+	B19050	Proteomics, DNAJA1 IHC	ROS	34	1	2	2	20	1	2	2	2	1	3	3	3	2	0	0	1	0	0
Control	75.9945	F	5.91667	0	0			B06076	Proteomics, TMEFF2 IHC, HTRA1 IHC, RIMS1 IHC, DNAJA1 IHC	MAP	33	1	1	2	12	1	2	1	0	0	0	4	4	0	0	1	2	0	0
Control	90.4613	F	26	0	0			B07019	Proteomics, TMEFF2 IHC, HTRA1 IHC, RIMS1 IHC, DNAJA1 IHC	MAP	34	1	2	2	12	1	2	0	1	0	2	4	3	0	0	2	1	0	0
Control	86.7023	M	3.88333	0	0			B09009	Proteomics, TMEFF2 IHC, RIMS1 IHC, DNAJA1 IHC	MAP	23	1	2	2	14	1	2	0	1	0	1	4	3	0	0	1	1	0	1
Control	79.5346	M	16.75	0	0			ROS198	Proteomics, TMEFF2 IHC, HTRA1 IHC, RIMS1 IHC, DNAJA1 IHC	ROS	33	1	2	2	18	1	2	0	1	0	2	4	3	0	0	1	1	0	0
Control	90.9021	M	6.91667	0	0			B13055	Proteomics, TMEFF2 IHC, HTRA1 IHC, RIMS1 IHC, DNAJA1 IHC	ROS	34	1	1	2	20	1	2	1	2	0	3	4	3	0	0	0	1	1	0
Control	84.2163	M	10.7333	0	0			B13063	Proteomics, TMEFF2 IHC, HTRA1 IHC, RIMS1 IHC, DNAJA1 IHC	ROS	34	1	2	2	14	1	2	1	1	0	2	4	3	0	1	0	0	0	1
Control	95.0007	F	4.95	1	0			B08061	Proteomics, TMEFF2 IHC, HTRA1 IHC, RIMS1 IHC, DNAJA1 IHC	MAP	33	1	2	2	14	1	2	1	1	0	2	4	3	0	2	2	1	0	0
Control	92.7885	F	3.25	1	0			ROS223	Proteomics, TMEFF2 IHC, HTRA1 IHC, RIMS1 IHC, DNAJA1 IHC	ROS	23	1	2	2	18	1	2	0	2	0	4	4	3	0	1	2	2	0	1
Control	83.3676	F	1	1	0			ROS271	Proteomics, TMEFF2 IHC, HTRA1 IHC, RIMS1 IHC, DNAJA1 IHC	ROS	33	1	1	2	14	1	2	1	1	0	1	4	3	0	0	1	0	0	0
Control	80.8542	F	4.83333	1	0			ROS301	Proteomics, TMEFF2 IHC, RIMS1 IHC, DNAJA1 IHC	ROS	33	1	2	2	16	1	2	1	1	1	2	3	3	0	0	1	1	0	0
Control	81.6181	M	7.16667	1	1	++		B03068	Proteomics, TMEFF2 IHC, HTRA1 IHC, RIMS1 IHC, DNAJA1 IHC	MAP	33	1	1	2	15	1	2	1	1	0	2	4	3	0	0	3	2	1	0
Control	91.4305	F	15.3333	1	1	+		ROS232	Proteomics, TMEFF2 IHC, HTRA1 IHC, RIMS1 IHC, DNAJA1 IHC	ROS	23	1	2	2	24	1	2	0	2	0	3	4	3	2	0	0	2	0	0
Control	78.3244	M	9.75	2	1	++	+	B03051	Proteomics, TMEFF2 IHC, HTRA1 IHC, RIMS1 IHC, DNAJA1 IHC	ROS	34	1	2	2	20	1	2	1	1	1	2	3	3	0	0	0	1	1	0
Control	86.2697	M	17.75	2	1	+	+	B13010	Proteomics, TMEFF2 IHC, HTRA1 IHC, RIMS1 IHC, DNAJA1 IHC	ROS	34	1	2	2	10	1	1	1	2	2	4	2	2	3	1	0	0	0	0
Control	85.3799	F	5.83333	3	1	+++	+	B08034	Proteomics, TMEFF2 IHC, HTRA1 IHC, RIMS1 IHC, DNAJA1 IHC	ROS	44	1	2	2	16	1	2	1	2	1	3	3	3	0	0	0	1	0	1
Control	85.0951	F	4.83333	1	3	++	++	B08044	Proteomics, TMEFF2 IHC, HTRA1 IHC, RIMS1 IHC, DNAJA1 IHC	ROS	34	1	2	2	18	1	2	2	2	2	4	2	2	0	1	3	2	0	0
Control	70.4832	M	20.7167	3	1	+++	+	B16063	Proteomics, TMEFF2 IHC, RIMS1 IHC, DNAJA1 IHC	ROS	34	1	2	2	22	1	2	2	0	2	0	2	3	0	0	0	1	0	0
Control	93.6427	F	12.4167	4	1	++	+	B09056	Proteomics, TMEFF2 IHC, HTRA1 IHC, RIMS1 IHC, DNAJA1 IHC	ROS	34	1	1	2	19	1	2	2	1	1	1	3	3	0	0	0	1	0	0
Control	82.8857	M	6.08333	2	3	+++	+	ROS190	Proteomics, TMEFF2 IHC, HTRA1 IHC, RIMS1 IHC, DNAJA1 IHC	ROS	34	1	1	2	23	1	2	2	1	1	1	3	3	0	0	0	2	0	0
Control	84.5804	F	6	4	2	++	+	B13003	Proteomics, TMEFF2 IHC, HTRA1 IHC, RIMS1 IHC, DNAJA1 IHC	ROS	23	1	2	2	16	1	2	2	2	2	4	2	2	0	0	1	1	0	0
Control	80.2108	M	26.5	5	4	+++	+	ROS288	Proteomics, TMEFF2 IHC, HTRA1 IHC, RIMS1 IHC, DNAJA1 IHC	ROS	34	1	2	2	21	1	2	2	2	2	3	2	2	0	0	0	1	0	0
Control	89.41	F	27	5	5	+++	+	ROS284	Proteomics, TMEFF2 IHC, HTRA1 IHC, RIMS1 IHC, DNAJA1 IHC	ROS	34	1	1	2	19	1	2	2	2	2	3	2	2	0	0	1	1	0	0
MCI	96.961	F	7.91667	1	0			B16001	Proteomics	MAP	34	2	2	2	17	1	2	2	2	3	4	1	2	0	2	0	0	1	0
MCI	92.4381	F	7.15	1	1	+	+	B08103	Proteomics	MAP	34	2	2	2	16	1	2	1	1	1	2	3	3	0	0	1	0	0	1
MCI	97.4511	F	5.03333	1	1	+	+	B16021	Proteomics	ROS	33	2	2	2	16	1	2	2	2	2	3	2	2	0	0	1	1	1	0
MCI	91.7755	M	4.28333	1	1	++	++	B19101	Proteomics	ROS	22	2	1	2	20	1	2	3	2	3	4	1	2		0	0	1	0	1
MCI	90.5955	M	5.41667	1	1	+	+	ROS278	Proteomics	MAP	34	2	2	2	16	1	2	3	2	2	4	2	2	0	0	0	0	0	0
MCI	95.5893	F	6.91667	2	1	++	++	B11034	Proteomics	MAP	34	2	1	2	13	1	2	2	1	3	2	1	2	0	3	1	1	0	0
MCI	84.8761	F	5.25	3	1	+	+	B08076	Proteomics	MAP	34	2	2	2	14	1	2	2	2	3	4	1	2	0	0	0	1	0	0
MCI	80.0493	F	2.66667	3	1	+	+	ROS143	Proteomics	ROS	33	2	2	2	17	1	2	2	2	2	4	2	2	0	3	0	1	0	0
MCI	91.8001	M	16	3	2	++	+	B10060	Proteomics	ROS	34	2	2	2	19	1	2	2	2	3	4	1	2	3	2	0	2	1	0
MCI	97.2676	F	24	4	1	++	+	B14049	Proteomics	ROS	23	3	1	2	20	1	2	2	2	2	4	2	2	0	1	1	1	0	0
MCI	84.4162	F	6.06667	3	3	++	++	B05017	Proteomics	MAP	34	2	2	2	16	1	2	2	1	2	2	2	3	0	3	2	2	1	0
MCI	100.821	F	3.83333	5	4	+++	+	B07020	Proteomics	ROS	33	2	1	2	20	1	2	2	2	2	4	2	2	0	3	1	2	0	0
MCI	91.4059	F	2.75	5	5	++	++	ROS206	Proteomics	ROS	34	2	1	2	15	1	2	2	3	2	5	2	2	0	0	0	3	1	0
MCI	79.4415	F	4.5	5	5	+++	++	ROS246	Proteomics	ROS	34	2	2	2	20	1	2	2	1	2	1	2	3	0	0	0	0	0	0
MCI	88.7584	M	21	1	0			B15010	Proteomics, DNAJA1 IHC	ROS	33	2	2	2	17	1	2	2	2	2	4	2	2	0	3	0	1	0	1
MCI	96.3176	M	5.91667	1	1	+	+	B13074	Proteomics, DNAJA1 IHC	ROS	23	2	1	2	19	1	2	3	2	2	3	2	2	0	0	0	1	0	0
MCI	95.0828	F	5.05	1	1	++	+	B15111	Proteomics, DNAJA1 IHC	MAP	23	2	2	2	12	1	2	3	2	3	4	1	2	0	3	1	1	0	0
MCI	85.7002	F	14.3333	2	1	++	+	B18057	Proteomics, HTRA1 IHC, DNAJA1 IHC	MAP	23	2	2	2	18	1	2	2	2	2	3	2	2	3	3	0	0	1	0
MCI	87.8385	F	19.25	2	2	++	+	B04018	Proteomics, HTRA1 IHC, DNAJA1 IHC	MAP	34	2	1	2	12	1	2	2	2	1	4	3	3	0	0	2	1	1	0
MCI	86.319	F	3.83333	2	2	+++	+	ROS115	Proteomics, HTRA1 IHC, DNAJA1 IHC	ROS	33	2	2	2	24	1	2	1	2	0	4	4	3	0	3	3	1	0	0
MCI	89.2211	F	4	3	2	++	+	B09045	Proteomics, HTRA1 IHC, DNAJA1 IHC	ROS	34	2	1	2	20	1	2	2	2	2	3	2	2	0	2	0	1	1	0
MCI	88.6571	F	3.58333	3	2	+++	+	B99047	Proteomics, HTRA1 IHC, DNAJA1 IHC	ROS	33	2	1	2	20	1	2	2	2	2	3	2	2	0	0	3	1	1	0
MCI	82.8939	F	4	4	1	+++	+	ROS254	Proteomics, DNAJA1 IHC	ROS	23	2	1	2	18	1	2	3	2	2	4	2	2	0	3	2	2	1	1
MCI	89.7823	M	20.8833	4	2	+++	+	B13079	Proteomics, DNAJA1 IHC	ROS	34	2	2	2	12	1	2	2	2	3	4	1	2	0	0	0	1	0	0
MCI	85.8508	M	10.6333	4	3	+++	+	B06089	Proteomics, DNAJA1 IHC	ROS	34	2	1	2	20	1	2	3	2	2	4	2	2	0	1	0	1	0	0
MCI	91.1348	F	9.53333	4	4	+++	+	B18049	Proteomics, DNAJA1 IHC	ROS	33	2	2	2	18	1	2	2	2	2	3	2	2	0	0	0	1	0	0
MCI	98.0068	F	7.35	2	3	+++	+	B16015	Proteomics, TMEFF2 IHC, HTRA1 IHC, RIMS1 IHC, DNAJA1 IHC	ROS	23	2	2	2	12	1	2	2	2	2	4	2	2	0	3	1	0	0	0
MCI	89.3224	M	4.98333	3	3	+++	++	B07068	Proteomics, TMEFF2 IHC, HTRA1 IHC, RIMS1 IHC, DNAJA1 IHC	ROS	33	2	1	2	14	1	2	2	2	2	4	2	2	0	0	3	3	1	1
MCI	88.4791	F	6.16667	4	3	+++	+	B11064	Proteomics, TMEFF2 IHC, RIMS1 IHC, DNAJA1 IHC	MAP	23	2	2	2	17	1	2	2	3	3	5	1	1	0	0	2	0	1	0
MCI	74.9596	M	16	4	3	++	++	ROS297	Proteomics, TMEFF2 IHC, HTRA1 IHC, RIMS1 IHC, DNAJA1 IHC	ROS	34	2	1	2	23	1	2	2	2	2	3	2	2	0	0	0	0	0	0
MCI	93.6318	F	12.3333	4	5	+++	+++	B08029	Proteomics, TMEFF2 IHC, RIMS1 IHC, DNAJA1 IHC	ROS	33	2	1	2	16	1	2	2	1	2	2	2	2	0	0	1	2	0	0
MCI	84.8049	M	20.5	5	4	+++	++	B05068	Proteomics, TMEFF2 IHC, HTRA1 IHC, RIMS1 IHC, DNAJA1 IHC	MAP	23	2	2	2	18	1	2	2	2	2	3	2	2	0	1	0	0	0	0
MCI	83.54	M	5.08333	4	5	+++	+	B08031	Proteomics, TMEFF2 IHC, HTRA1 IHC, RIMS1 IHC, DNAJA1 IHC	ROS	34	2	2	2	18	1	2	3	2	2	4	2	2	0	2	2	3	1	0
MCI	85.0021	F	17.8333	4	5	+++	+	B10021	Proteomics, TMEFF2 IHC, RIMS1 IHC, DNAJA1 IHC	ROS	33	2	2	2	16	1	2	2	2	2	4	2	2	0	1	1	1	1	0
MCI	84.4791	F	5.5	5	5	+++	+++	B05037	Proteomics, TMEFF2 IHC, RIMS1 IHC, DNAJA1 IHC	MAP	44	2	2	2	12	1	2	2	2	1	3	3	3	0	3	2	2	1	1
MCI	88.5996	F	19.5833	5	5	+++	+	ROS215	Proteomics, TMEFF2 IHC, HTRA1 IHC, RIMS1 IHC, DNAJA1 IHC	ROS	33	2	2	2	16	1	2	1	2	2	4	2	2	2	1	0	2	0	0
MCI	95.2909	F	NA	3	3	++	+++	B15017	TMEFF2 IHC, RIMS1 IHC	ROS	34	2	1	2	18	1	2	2	2	2	3	2	2	2	0	1	1	1	1
MCI	90.6146	F	12.5	1	5	+	+++	B09079	TMEFF2 IHC, HTRA1 IHC, RIMS1 IHC	MAP	23	2	2	2	18	3	2	2	2	3	4	1	2	0	1	0	0	0	1
AD	87.6468	F	10.0833	1	1	+++	+	B19092	Proteomics	ROS	33	4	2	2	16	1	2	3	3	3	5	1	1	3	0	2	1	0	0
AD	94.2669	F	10.3333	2	1	+++	+	B12053	Proteomics	ROS	34	4	2	2	16	1	2	3	3	3	5	1	1	0	2	2	1	0	1
AD	92.0219	M	4.75	2	1	++	+	B18121	Proteomics	ROS	34	4	2	2	12	1	2	3	3	3	5	1	1	0	3	0	1	0	1
AD	99.6961	F	17.8333	3	1	+	+	B09099	Proteomics	ROS	33	4	2	2	20	1	2	3	3	3	5	1	1	0	0	1	2	1	0
AD	82.3737	F	17	3	1	+++	+	B12063	Proteomics	ROS	33	4	2	2	18	1	2	3	3	3	6	1	1	3	0	1	1	0	0
AD	97.9658	M	4	3	1	+	+	B15087	Proteomics	ROS	34	4	1	2	30	1	2	3	3	3	5	1	1	0	1	1	0	1	0
AD	93.1143	F	4.28333	3	1	+++	+	B16087	Proteomics	ROS	33	4	2	2	16	1	2	3	3	3	5	1	1	2	3	0	1	0	0
AD	90.0643	F	14.1833	3	1	+++	+	B18108	Proteomics	ROS	33	4	2	2	5	1	1	3	3	3	5	1	1	0	1	0	0	0	0
AD	97.8234	F	5.66667	3	2	+++	+	B18110	Proteomics	ROS	33	4	2	2	18	1	2	3	3	3	5	1	1		1	1	1	1	1
AD	96.2272	F	6.16667	3	2	+++	+	ROS181	Proteomics	ROS	33	4	2	2	8	1	2	3	3	3	5	1	1	3	3	2	1	0	0
AD	96.9993	F	20.65	3	3	+++	+	B14007	Proteomics	ROS	33	4	2	2	18	1	2	3	3	3	5	1	1	0	3	1	0	0	0
AD	95.8549	F	17.1667	4	2	++	+	B17062	Proteomics	ROS	33	4	2	2	20	1	2	3	3	3	5	1	1		1	2	1	0	0
AD	93.0951	F	4.66667	5	1	+++	+	B17068	Proteomics	ROS	33	4	2	2	19	1	2	3	3	3	6	1	1	0	3	3	1	0	0
AD	97.191	F	17.9	3	3	+++	++	B17084	Proteomics	ROS	33	4	1	2	18	1	2	3	3	3	5	1	1	0	3	2	2	0	0
AD	87.8001	F	2.66667	4	2	+++	+	B19039	Proteomics	ROS	33	4	2	2	18	1	2	3	3	3	6	1	1	2	3	1	1	0	1
AD	80.3231	M	2.66667	4	2	+++	++	ROS152	Proteomics	ROS	34	4	2	2	21	1	2	3	3	3	5	1	1	0	2	0	1	0	0
AD	89.5797	F	5.83333	4	3	+++	+	B09008	Proteomics	ROS	34	4	2	2	19	1	2	3	3	3	5	1	1	0	3	1	1	1	0
AD	101.248	M	4.75	5	2	+++	+	B14034	Proteomics	ROS	33	4	2	2	13	1	2	3	3	3	5	1	1	0	1	1	2	0	0
AD	97.3005	M	16.4167	4	3	+++	+	B17038	Proteomics	ROS	34	4	1	2	18	1	2	3	3	3	5	1	1	0	3	1	1	0	1
AD	92.8871	F	7.33333	4	3	+++	+	B18006	Proteomics	ROS	34	4	2	2	16	1	2	3	3	3	5	1	1	0	0	3	2	1	0
AD	89.8782	F	7.25	4	4	+++	+	B10056	Proteomics	ROS	34	4	2	2	21	1	2	3	3	3	5	1	1		0	0	2	0	1
AD	90.0972	F	4.96667	5	3	+++	++	B12047	Proteomics	ROS	33	4	2	2	17	1	2	3	3	3	5	1	1	0	3	0	0	0	0
AD	95.9507	F	4.25	5	4	++	++	B07040	Proteomics	ROS	33	4	2	2	24	1	2	3	3	3	5	1	1	0	0	2	3	1	1
AD	98.8446	F	3.8	5	4	++	++	B09020	Proteomics	ROS	34	4	1	2	18	1	2	3	3	3	5	1	1		0	0	3	1	1
AD	97.5414	F	16.5167	5	5	+++	+++	B17054	Proteomics	ROS	33	4	2	2	20	1	2	3	3	3	5	1	1	0	3	2	1	0	0
AD	88.4271	F	8.08333	3	2	++	++	B08051	Proteomics, DNAJA1 IHC	ROS	33	4	2	2	18	1	2	3	3	3	5	1	1	0	3	1	2	1	0
AD	87.9261	F	19.5833	3	2	++	++	B10103	Proteomics, DNAJA1 IHC	ROS	33	4	2	2	18	1	2	3	3	3	5	1	1	0	3	3	2	1	0
AD	92.3614	F	19.6667	3	2	++	++	B17109	Proteomics, DNAJA1 IHC	MAP	23	4	1	2	12	1	2	3	3	3	6	1	1	0	3	2	2	1	0
AD	86.3518	F	31.6	4	2	+++	+	B17053	Proteomics, DNAJA1 IHC	ROS	34	4	2	2	16	1	2	3	3	3	5	1	1	0	3	2	2	0	0
AD	93.9083	F	3.48333	4	2	+++	+	B18083	Proteomics, DNAJA1 IHC	MAP	23	4	2	2	12	1	2	3	3	3	5	1	1	0	2	0	0	0	1
AD	89.7139	M	13.25	5	2	++	+	B06007	Proteomics, HTRA1 IHC, DNAJA1 IHC	ROS	33	4	2	2	21	1	2	3	3	3	5	1	1	0	1	1	3	0	0
AD	84.9528	F	38.0833	4	3	+++	+	B17097	Proteomics, DNAJA1 IHC	MAP	23	4	2	2	10	1	2	3	3	3	5	1	1		1	2	1	1	1
AD	89.0267	M	3.5	4	3	++	++	ROS282	Proteomics, HTRA1 IHC, DNAJA1 IHC	ROS	34	4	2	2	22	1	2	3	3	3	6	1	1	0	2	2	2	0	0
AD	83.948	M	39	5	3	+++	+	B15065	Proteomics, HTRA1 IHC, DNAJA1 IHC	ROS	44	4	2	2	21	1	2	3	3	3	5	1	1	3	1	0	1	1	1
AD	87.6687	F	17.4167	5	4	++	+	B10016	Proteomics, DNAJA1 IHC	ROS	34	4	2	2	20	1	2	3	3	3	5	1	1	3	2	1	2	0	0
AD	83.4962	M	13.8333	5	5	+++	++	B16011	Proteomics, DNAJA1 IHC	ROS	44	4	2	2	15	2	2	3	3	3	6	1	1	0	2	2	1	1	1
AD	74.7734	F	5.08333	5	3	+++	++	B05106	Proteomics, HTRA1 IHC	ROS	34	4	2	2	16	1	2	3	3	3	5	1	1	0	0	2	1	0	0
AD	95.8658	M	14.1667	3	1	+	+	B15088	Proteomics, HTRA1 IHC, RIMS1 IHC, DNAJA1 IHC	ROS	33	4	2	2	10	1	2	3	3	3	5	1	1	3	0	0	1	1	1
AD	80.0767	F	10.1667	5	4	+++	++	B16058	Proteomics, HTRA1 IHC, RIMS1 IHC, DNAJA1 IHC	ROS	44	4	2	2	26	1	1	3	3	3	5	1	1	0	1	0	0	0	0
AD	91.7919	F	6.58333	5	5	+++	+	B08112	Proteomics, HTRA1 IHC, RIMS1 IHC, DNAJA1 IHC	ROS	34	4	2	2	14	1	2	3	3	3	5	1	1	2	1	1	1	0	0
AD	91.5455	F	5.08333	5	5	+++	+	ROS213	Proteomics, HTRA1 IHC, RIMS1 IHC, DNAJA1 IHC	ROS	33	4	1	2	14	1	2	3	3	3	5	1	1	0	2	0	2	0	0
AD	86.1821	F	6	4	3	+++	+	B13001	Proteomics, RIMS1 IHC	ROS	34	4	2	2	18	1	2	3	3	3	5	1	1	2	1	1	1	0	0
AD	83.6359	F	16.6833	5	5	+++	+++	B15085	Proteomics, TMEFF2 IHC	ROS	44	4	2	2	21	1	2	3	3	3	6	1	1	0	0	2	1	0	0
AD	90.4723	F	8.23333	5	5	+++	+++	B17005	Proteomics, TMEFF2 IHC	ROS	34	4	2	2	19	1	2	3	3	3	5	1	1	0	1	2	1	0	1
AD	87.666	F	26.1667	5	5	+++	+++	ROS262	Proteomics, TMEFF2 IHC	ROS	33	4	1	2	18	1	2	3	3	3	5	1	1	0	1	1	3	1	0
AD	80.7365	F	6	5	5	+++	+++	B09108	Proteomics, TMEFF2 IHC, DNAJA1 IHC	ROS	34	4	2	2	16	1	2	3	3	3	5	1	1	0	3	0	1	0	0
AD	96.0876	F	13.5	3	3	+++	+	ROS263	Proteomics, TMEFF2 IHC, HTRA1 IHC, RIMS1 IHC, DNAJA1 IHC	ROS	23	4	1	2	12	1	2	3	3	3	5	1	1	0	3	1	1	0	1
AD	86.9322	M	8.66667	4	3	+++	+	B10068	Proteomics, TMEFF2 IHC, HTRA1 IHC, RIMS1 IHC, DNAJA1 IHC	ROS	23	4	2	2	24	1	2	3	3	3	5	1	1	2	3	1	2	0	1
AD	94.9651	F	7.7	4	3	+++	++	B12040	Proteomics, TMEFF2 IHC, HTRA1 IHC, RIMS1 IHC, DNAJA1 IHC	ROS	23	4	2	2	16	1	2	3	3	3	5	1	1	3	0	1	1	0	0
AD	82.7105	F	2.16667	5	5	+++	+++	B99037	Proteomics, TMEFF2 IHC, RIMS1 IHC, DNAJA1 IHC	ROS	44	4	2	2	16	1	2	3	3	3	5	1	1	3	2	0	1	0	0
AD	93.4428	M	5.83333	5	5	+++	+++	ROS256	Proteomics, TMEFF2 IHC, RIMS1 IHC, DNAJA1 IHC	ROS	34	4	2	2	22	1	2	3	3	3	5	1	1	3		0	1	0	0
AD	72.3997	F	3	5	5	+++	++	B10028	Proteomics, TMEFF2 IHC, HTRA1 IHC, RIMS1 IHC, DNAJA1 IHC	ROS	33	4	2	2	13	1	2	3	3	3	5	1	1	3	1	1	0	0	0
AD	86.7871	M	3.66667	5	5	+++	+	ROS250	Proteomics, TMEFF2 IHC, HTRA1 IHC, RIMS1 IHC, DNAJA1 IHC	ROS	33	4	2	2	12	1	2	3	3	3	5	1	1	2	0	1	2	1	0
AD	96.3313	M	5	4	3	++	+++	B08022	TMEFF2 IHC	ROS	33	4	1	2	24	1	2	3	3	3	5	1	1	0	0	1	1	1	0

## Sheet: Supplementary Table 2
Supplementary Table 2. LC-MS/MS Data and T-tests
ProteinGroupRepresentative	Genes	Names	Cell type	p value MCI P_NP	-Log Student's T-test p-value MCI_P_MCI_NP	Student's T-test q-value MCI_P_MCI_NP	Student's T-test Difference MCI_P_MCI_NP	Student's T-test Test statistic MCI_P_MCI_NP	MCI_P_MCI_NP FC>1.5; FDR<5	MCI_P_MCI_NP FDR<5	p value AD P_NP	-Log Student's T-test p-value AD_P_AD_NP	Student's T-test q-value AD_P_AD_NP	Student's T-test Difference AD_P_AD_NP	Student's T-test Test statistic AD_P_AD_NP	AD_P_AD_NP FC>1.5; FDR<5	AD_P_AD_NP FDR<5	p value MCI_Control NP	-Log Student's T-test p-value MCI_NP_Control_NP	Student's T-test q-value MCI_NP_Control_NP	Student's T-test Difference MCI_NP_Control_NP	Student's T-test Test statistic MCI_NP_Control_NP	MCI_NP_Control_NP FC>1.5; FDR<5	MCI_NP_Control_NP FDR<5	p value AD_Control NP	-Log Student's T-test p-value AD_NP_Control_NP	Student's T-test q-value AD_NP_Control_NP	Student's T-test Difference AD_NP_Control_NP	Student's T-test Test statistic AD_NP_Control_NP	AD_NP_Control_NP FC>1.5; FDR<5	AD_NP_Control_NP FDR<5	AD__np__B05106	AD__np__B06007	AD__np__B07040	AD__np__B08051	AD__np__B08112	AD__np__B09008	AD__np__B09020	AD__np__B09099	AD__np__B09108	AD__np__B10016	AD__np__B10028	AD__np__B10056	AD__np__B10068	AD__np__B10103	AD__np__B12040	AD__np__B12047	AD__np__B12053	AD__np__B12063
Q9BXS0	COL25A1	Collagen alpha-1(XXV) chain	Undefined	0.00150923	2.82124	0.00197169	9.43948	6.27505	+	+	0.0670744	1.17344	0.0700584	2.67852	1.98517			1	0	0.994737	-2.82424	0			1	0	1	2.54226	0			NaN	NaN	NaN	NaN	12.5792	NaN	NaN	NaN	11.5512	9.48485	11.7203	NaN	10.9108	NaN	NaN	9.08737	NaN	NaN
P21741	MDK	Midkine	Undefined	7.85912e-22	21.1046	0	5.10511	24.463	+	+	2.69296e-09	8.56977	0	4.03259	7.31846	+	+	0.0205819	1.68651	0.143921	0.812063	2.37748			0.170079	0.76935	0.246615	0.875301	1.38491			2.22143	14.2264	14.0123	2.25139	14.9144	13.6754	14.0918	NaN	14.5065	13.7845	2.00869	14.5954	14.0484	14.3768	2.37083	14.4472	NaN	14.0164
P21246	PTN	Pleiotrophin	Undefined	3.70601e-16	15.4311	0	3.71134	17.3329	+	+	1.21634e-15	14.9149	0	3.49918	12.5618	+	+	0.516184	0.287196	0.733687	0.281631	0.652329			0.94748	0.0234301	0.969194	-0.0292108	-0.066056			11.4862	11.3931	NaN	9.58822	NaN	8.82077	7.75238	14.2286	13.5858	NaN	10.2243	1.85683	9.80619	10.6303	11.8727	11.4572	NaN	10.2965
P16070	CD44	CD44 antigen	Undefined	0.00037936	3.42095	0.000628205	3.32168	4.26414	+	+	1.20852e-14	13.9177	0	1.50094	10.7032	+	+	0.0311563	1.50645	0.181169	-1.27192	-2.2007			1.51653e-05	4.81915	3.57143e-05	1.37979	4.55384	+	+	13.1012	8.57121	12.4131	13.2496	12.6744	13.3265	10.3732	12.7273	12.5405	13.7589	13.0057	12.8396	11.4284	12.9776	11.8767	12.7571	13.1706	14.7518
Q9H267	VPS33B	Vacuolar protein sorting-associated protein 33B	Undefined	2.30442e-05	4.63744	1.94175e-05	3.12424	5.88489	+	+	1.23158e-06	5.90954	0	2.3789	5.65792	+	+	5.20057e-05	4.28395	0.00252005	-2.50435	-4.29678	+	+	0.0971432	1.01259	0.152017	-0.729901	-1.67523			10.5863	10.9647	8.82053	8.70763	9.76269	10.2871	9.49962	14.5737	10.6209	9.27317	10.8112	10.273	1.34491	10.0464	14.0464	7.86872	9.70016	10.0198
P51797	CLCN6	H(+)/Cl(-) exchange transporter 6	Undefined	2.64446e-09	8.57766	0	3.05072	8.14653	+	+	3.2792e-16	15.4842	0	2.05596	12.3506	+	+	1.2204e-06	5.9135	0.000188153	-1.65129	-5.22108	+	+	0.0319651	1.49532	0.0558922	0.459452	2.17529			10.5984	9.5612	NaN	8.9203	12.0324	9.30386	9.33316	12.2925	12.588	12.2756	12.2056	12.0155	12.7631	11.6861	11.43	8.86505	11.9113	11.185
P05067pept	A4pept	Amyloid beta peptide	Undefined	1.01771e-26	25.9924	0	3.03298	30.3273	+	+	2.38125e-28	27.6232	0	2.62958	22.3731	+	+	5.16897e-16	15.2866	0	3.54579	10.1098	+	+	3.98252e-25	24.3998	0	4.06309	14.0059	+	+	15.5314	16.1899	16.4113	14.8054	15.1593	15.2428	15.8057	14.965	15.805	15.378	16.2045	15.999	16.3202	16.6636	16.7755	16.3666	16.337	16.3067
P02649	APOE	Apolipoprotein E	Undefined	2.52911e-15	14.597	0	2.92923	13.3784	+	+	6.47064e-28	27.1891	0	2.86316	21.9033	+	+	4.40442e-14	13.3561	0	0.714342	8.8492	+	+	0.000255212	3.5931	0.000635659	0.282949	3.77665		+	16.7591	16.8832	16.4475	16.8201	17.3471	16.5953	16.8801	16.4994	17.2183	16.5743	17.1061	16.5807	16.8591	17.0751	16.858	16.9948	16.3657	16.8111
Q92743	HTRA1	Serine protease HTRA1	Undefined	1.20142e-12	11.9203	0	2.80264	11.0681	+	+	4.08442e-14	13.3889	0	2.49628	11.2549	+	+	4.7924e-05	4.31945	0.0023972	-1.09069	-4.29641	+	+	0.277312	0.557031	0.370367	-0.246491	-1.09307			10.7987	12.218	NaN	10.0326	12.3987	10.8407	12.5212	9.86633	11.35	12.0478	11.9024	12.4214	11.1799	12.1864	12.2736	11.9791	11.8262	12.0818
Q14956	GPNMB	Transmembrane glycoprotein NMB	Undefined	2.72786e-13	12.5642	0	2.75837	12.347	+	+	3.34689e-22	21.4754	0	3.58305	16.5945	+	+	0.084658	1.07233	0.304004	0.462875	1.74466			0.0197335	1.7048	0.0360302	0.574096	2.36728		+	13.4343	7.95837	13.6317	12.7113	13.9309	11.5086	11.8123	13.8127	13.2763	12.6964	13.8516	11.4877	13.2236	12.7414	11.6552	13.9588	13.0916	13.3514
Q9UIK5	TMEFF2	Tomoregulin-2	Undefined	2.01599e-11	10.6955	0	2.58979	15.4104	+	+	8.18275e-12	11.0871	0	1.92	11.3855	+	+	0.40709	0.390309	0.656154	-0.118254	-0.838848			0.0566329	1.24693	0.0945703	-0.354302	-1.95647			NaN	11.7313	11.6627	NaN	11.168	11.6099	11.6544	11.0136	11.8462	NaN	NaN	10.6669	10.7083	11.3129	NaN	10.9822	9.4645	10.6825
Q9Y2W3	SLC45A1	Proton-associated sugar transporter A	Undefined	1.13456e-05	4.94517	1.0582e-05	2.55166	9.61783	+	+	0.0227165	1.64366	0.0216263	1.57278	4.32993	+	+	0.399113	0.398904	0.649535	0.327327	0.859171			0.960347	0.0175716	0.978149	0.0225936	0.0506846			NaN	NaN	NaN	NaN	9.04565	NaN	NaN	NaN	10.5795	8.8931	NaN	NaN	NaN	NaN	NaN	NaN	NaN	NaN
Q9H4F8	SMOC1	SPARC-related modular calcium-binding protein 1	OPC	1.87592e-14	13.7268	0	2.46512	12.488	+	+	1.11731e-13	12.9518	0	1.9066	9.97911	+	+	0.0196859	1.70584	0.140683	-0.66449	-2.37203			0.461963	0.335392	0.564181	0.195823	0.738134			12.9523	13.8212	14.0554	14.1032	14.018	13.192	15.0492	13.1976	13.3191	13.4109	12.9323	14.3997	14.1819	12.1312	13.7059	13.6564	13.176	13.7357
P28799	GRN	Progranulin	Undefined	3.87586e-13	12.4116	0	2.29509	11.7424	+	+	6.81477e-17	16.1665	0	1.85156	12.6462	+	+	0.816369	0.0881138	0.91085	0.0558468	0.232966			0.000853173	3.06896	0.00192102	0.714716	3.44102	+	+	11.9338	12.0331	12.5343	11.4132	9.97126	12.1763	11.4631	13.4771	12.8348	13.143	11.8043	12.4773	12.6431	13.1568	13.4428	13.0236	11.8542	12.1889
P50552	VASP	Vasodilator-stimulated phosphoprotein	Undefined	0.000174908	3.75719	0.000313869	1.98207	23.2233	+	+	0.329305	0.482401	0.348208	0.150739	0.999897			0.0343198	1.46445	0.190796	-0.795948	-2.28993			0.102761	0.988172	0.15935	0.457928	1.67676			10.492	10.0713	NaN	11.0443	11.3455	11.0453	11.3097	11.1991	NaN	11.2466	10.0484	9.64928	9.60769	10.6599	NaN	10.8176	9.87778	9.6739
Q9P0J7	KCMF1	E3 ubiquitin-protein ligase KCMF1	Undefined	8.74089e-13	12.0584	0	1.96107	11.3807	+	+	1.06352e-12	11.9733	0	1.6975	9.77265	+	+	1.11549e-05	4.95253	0.000699725	0.530657	4.64239		+	0.362558	0.440623	0.46397	0.094434	0.914303			12.7063	13.4738	13.9308	13.3311	13.4126	13.596	13.4402	13.3591	13.4474	13.2746	13.7344	14.1684	13.8509	13.6177	13.9648	13.5907	13.0294	13.5098
P36955	SERPINF1	Pigment epithelium-derived factor	Undefined	1.30983e-06	5.88278	0	1.91287	6.12455	+	+	0.000215276	3.667	0.000157156	2.16762	4.18929	+	+	0.621152	0.206802	0.802075	-0.180448	-0.496248			0.370044	0.431747	0.471017	-0.373887	-0.901347			6.66745	8.21171	12.2151	NaN	8.62123	8.54515	10.7368	NaN	11.0428	NaN	11.0578	NaN	10.8273	10.2056	10.9694	9.2662	1.02277	NaN
P31431	SDC4	Syndecan-4	Undefined	1.9609e-07	6.70754	0	1.9044	7.4319	+	+	8.48666e-09	8.07126	0	2.87148	7.34304	+	+	0.821815	0.0852257	0.91298	0.0857311	0.22627			0.120618	0.918589	0.1836	-0.875424	-1.57078			12.2896	9.21056	11.1026	9.37411	10.1296	0.675093	13.2574	8.44964	13.1329	NaN	11.7353	11.2078	10.4747	13.5032	NaN	10.0732	10.0596	11.0078
Q00604	NDP	Norrin	Undefined	0.0335141	1.47477	0.0454451	1.86501	2.29175	+	+	9.46385e-07	6.02393	0	2.51109	5.76091	+	+	0.566564	0.246751	0.765779	-0.408134	-0.577193			0.842737	0.0743079	0.894156	0.129691	0.199153			10.3619	10.2859	8.2855	NaN	11.5092	9.61862	12.3159	7.68995	8.41086	10.828	11.171	0.39004	6.31927	10.4711	NaN	NaN	NaN	11.0843
P01911	HLA-DRB1	HLA class II histocompatibility antigen, DRB1 beta chain	Undefined	1.41435e-09	8.84944	0	1.766	8.47778	+	+	6.89623e-19	18.1614	0	1.65655	13.6995	+	+	0.952766	0.0210135	0.97841	-0.0103121	-0.0594168			0.000135322	3.86863	0.000346853	0.673373	3.96726	+	+	13.0349	11.5247	10.0176	12.8843	11.0843	12.2173	11.0478	12.8945	12.3523	13.5817	14.5358	12.9835	13.3119	11.8434	11.8782	12.9425	12.9628	13.8646
Q9Y4Z0	LSM4	U6 snRNA-associated Sm-like protein LSm4	Undefined	0.0263948	1.57848	0.0356691	1.71564	2.71641	+	+	0.0593579	1.22652	0.0613024	1.20583	1.95987			0.000698703	3.15571	0.0177307	-2.67813	-3.57199	+	+	0.00756181	2.12137	0.0149818	-1.8037	-2.73412	+	+	9.84413	12.9674	NaN	13.5812	17.4901	7.92672	9.76196	15.9139	13.5921	13.2555	NaN	NaN	8.87685	10.2326	9.59045	16.7618	17.142	13.937
P31025	LCN1	Lipocalin-1	Undefined	0.00457507	2.3396	0.0058138	1.69785	3.04959	+	+	0.11286	0.947461	0.120548	0.592749	1.61934			0.000514466	3.28864	0.0143156	-1.60651	-3.60043	+	+	0.661096	0.179735	0.748118	-0.17667	-0.439659			12.7374	12.9688	12.6893	16.1531	15.8204	13.9293	12.8989	16.2807	12.5376	13.6433	NaN	10.6362	NaN	17.4355	13.6082	14.8649	16.0121	NaN
P05107	ITGB2	Integrin beta-2	Undefined	2.84848e-07	6.54539	0	1.62708	6.93748	+	+	0.0450973	1.34585	0.0456756	0.713081	2.09102	+	+	0.00233146	2.63237	0.0389528	-0.833868	-3.17992	+	+	0.895404	0.0479807	0.931033	0.0409112	0.131984			10.8277	12.4157	NaN	11.0827	NaN	11.1752	NaN	11.297	12.8764	10.9227	9.69367	9.79437	9.95696	11.7776	NaN	16.5312	NaN	10.3058
Q59EK9	RUNDC3A	RUN domain-containing protein 3A	Undefined	2.70702e-13	12.5675	0	1.54779	11.9043	+	+	3.30591e-12	11.4807	0	1.47505	9.28615	+	+	0.143245	0.843921	0.395248	-0.195777	-1.4778			0.0502669	1.29872	0.0850515	-0.25753	-1.98211			10.3819	10.9738	11.3754	12.21	10.3575	11.5974	9.54679	11.2519	11.946	11.4309	11.9757	12.1382	11.2441	11.7942	11.1498	11.0065	12.3424	11.3997
O94985-2	CLSTN1	Calsyntenin-1	Undefined	1.18287e-19	18.9271	0	1.46358	18.5053	+	+	7.81804e-25	24.1069	0	1.4426	18.788	+	+	0.00104016	2.9829	0.0232208	0.149266	3.38267		+	1.5207e-09	8.81796	0	-0.309587	-6.58123		+	14.8789	14.8547	14.8683	14.7881	14.3794	14.9348	15.0794	14.8012	14.7539	14.236	14.638	14.9261	14.9016	14.2267	14.9842	14.6877	14.6318	14.5035
P35052	GPC1	Glypican-1	Ex	4.2484e-20	19.3718	0	1.40922	19.1084	+	+	4.24225e-31	30.3724	0	1.55929	25.5458	+	+	0.19771	0.703972	0.462508	0.0690646	1.29709			3.58631e-09	8.44535	0	-0.343138	-6.40375		+	13.9863	13.7944	13.7329	13.3882	13.3896	13.507	14.0252	13.7699	13.8602	13.5246	13.4425	13.8781	13.6798	13.4592	13.9974	12.8514	13.2718	13.3851
O95631	NTN1	Netrin-1	Undefined	0.00435475	2.36104	0.0056515	1.40164	3.12324	+	+	3.90861e-07	6.40798	0	1.88224	6.05868	+	+	0.93241	0.0303929	0.96886	0.0319435	0.0851018			0.97904	0.00919973	0.989606	0.00835061	0.0263478			12.8482	13.1766	14.1018	11.4914	10.912	10.468	10.7789	10.5617	NaN	13.6019	13.1339	13.6378	NaN	10.8525	12.452	NaN	13.8602	12.6307
P08493	MGP	Matrix Gla protein	Undefined	0.00619317	2.20809	0.00775385	1.36369	3.86228	+	+	0.138459	0.85868	0.148019	1.03326	1.84707			0.742363	0.129383	0.871115	0.158721	0.335822			0.676388	0.169804	0.761767	0.192906	0.42778			NaN	NaN	NaN	NaN	NaN	9.96179	NaN	NaN	NaN	NaN	NaN	NaN	NaN	10.8164	NaN	NaN	9.01964	NaN
P55107	GDF10	Growth/differentiation factor 10	Undefined	0.0156781	1.80471	0.0209527	1.35746	3.17136	+	+	5.72144e-07	6.24249	0	1.9115	10.2592	+	+	0.499801	0.301203	0.722095	0.260572	0.687277			0.222254	0.653151	0.309376	-0.274605	-1.25173			NaN	13.16	NaN	11.0503	11.8249	NaN	NaN	NaN	10.9623	12.5656	NaN	11.9856	11.6279	NaN	NaN	NaN	NaN	NaN
P04839	CYBB	Cytochrome b-245 heavy chain	Undefined	0.000345444	3.46162	0.000592834	1.35015	4.9342	+	+	3.67178e-06	5.43512	0	1.61953	5.96962	+	+	0.141817	0.84827	0.393561	0.46839	1.49864			0.0658641	1.18135	0.108493	-0.617913	-1.87893			11.3334	11.9445	NaN	NaN	13.195	11.5547	NaN	12.2093	NaN	12.6324	10.9231	9.80172	NaN	10.5254	NaN	NaN	8.4384	11.0053
Q30154	HLA-DRB5	HLA class II histocompatibility antigen, DR beta 5 chain	Undefined	2.27773e-05	4.6425	1.95599e-05	1.29889	5.48505	+	+	8.81845e-09	8.05461	0	1.38491	7.1928	+	+	0.18088	0.74261	0.443606	-0.346746	-1.35353			0.144086	0.841379	0.213316	0.346431	1.47501			12.5878	12.0761	12.8936	NaN	13.9028	13.2031	12.3272	12.2865	12.2866	11.859	NaN	12.9858	13.2604	13.9057	NaN	11.4953	11.348	14.251
Q9HCB6	SPON1	Spondin-1	Ex	7.61679e-08	7.11823	0	1.29237	7.20726	+	+	2.25958e-05	4.64597	4.47928e-06	0.979537	4.78138	+	+	9.95382e-07	6.00201	0.000159132	-0.933897	-5.3367	+	+	0.292891	0.533294	0.388761	-0.222447	-1.05821			13.0082	13.8837	NaN	NaN	13.9689	15.5518	15.2784	12.9321	15.072	14.9121	14.3738	10.2889	13.1007	12.3151	10.6054	12.6153	NaN	11.1741
P26599	PTBP1	Polypyrimidine tract-binding protein 1	Undefined	0.00141363	2.84967	0.00181014	1.28429	3.51646	+	+	0.0232782	1.63305	0.0221695	0.364592	2.34542		+	0.00233497	2.63172	0.0389713	-1.26994	-3.13732	+	+	0.0804108	1.09469	0.128293	0.396474	1.76586			10.2573	11.1501	NaN	12.6651	11.9985	9.86466	9.37915	12.1812	10.1586	12.2229	12.067	10.6918	10.7167	10.9096	11.6045	11.0411	11.7881	11.5919
P26447	S100A4	Protein S100-A4	Undefined	0.00569236	2.24471	0.00712317	1.27883	3.22275	+	+	1.68958e-15	14.7722	0	1.3342	12.1529	+	+	0.667925	0.175272	0.832284	0.140736	0.431966			8.85752e-07	6.05269	1.01523e-05	1.07268	5.38657	+	+	11.9764	12.2704	13.1137	13.0819	14.0941	12.8282	11.9019	12.5823	12.4298	12.2691	13.3774	NaN	13.856	13.465	NaN	13.439	NaN	13.3633
Q9Y6U3	SCIN	Scinderin	Undefined	9.6785e-06	5.01419	1.07527e-05	1.26609	6.34777	+	+	9.6359e-07	6.01611	0	0.832641	5.89377	+	+	0.0494221	1.30608	0.231065	0.382428	2.01487			0.571297	0.243138	0.674121	0.0848529	0.568901			13.2715	NaN	13.1222	13.2143	14.0948	13.3942	NaN	NaN	NaN	13.9192	13.5927	13.2369	13.3045	13.236	12.623	13.8227	NaN	13.6325
P36222	CHI3L1	Chitinase-3-like protein 1	Undefined	9.31071e-09	8.03102	0	1.2515	8.72874	+	+	0.00614929	2.21118	0.00535161	0.991677	2.87201	+	+	0.00527336	2.27791	0.0649447	-0.588468	-2.87155			0.652275	0.185569	0.741546	-0.162355	-0.451976			12.4873	1.05182	1.44878	13.0128	13.0806	12.6419	11.0975	14.2669	12.0417	11.3963	12.7896	12.9244	13.5465	14.3634	NaN	12.2358	13.2229	14.1258
O43504	LAMTOR5	Ragulator complex protein LAMTOR5	Undefined	7.67776e-09	8.11477	0	1.22832	7.60924	+	+	5.29301e-16	15.2763	0	1.12044	11.5723	+	+	4.76028e-07	6.32237	3.14342e-05	-0.723652	-5.40707	+	+	0.409707	0.387526	0.513662	-0.10148	-0.827483			11.8152	12.2523	12.3539	11.6965	12.4163	12.4223	11.906	11.4719	12.6304	12.448	12.5648	11.9014	11.6225	12.0097	12.3066	11.7447	12.61	12.0375
Q5TH69	ARFGEF3	Brefeldin A-inhibited guanine nucleotide-exchange protein 3	Undefined	3.74006e-14	13.4271	0	1.19193	12.1907	+	+	1.53926e-17	16.8127	0	1.29159	12.6819	+	+	0.167445	0.776127	0.426004	0.0733475	1.39099			0.592115	0.227594	0.692415	-0.0295639	-0.537303			12.588	12.5959	12.1149	12.3652	12.6817	12.5378	12.495	12.2996	12.4672	12.128	12.6343	12.6548	12.4609	12.4334	12.4108	12.3019	12.2568	12.3597
P05109	S100A8	Protein S100-A8	Undefined	0.00119746	2.92174	0.00157029	1.17955	3.57871	+	+	0.480105	0.318664	0.498693	0.13928	0.711927			0.0214902	1.66776	0.147345	-0.824182	-2.34104			0.65294	0.185127	0.742043	-0.130749	-0.45101			11.9692	12.2657	14.2689	14.1255	14.5718	13.6955	12.8564	14.8166	14.2302	13.4897	10.8353	12.2072	12.4897	11.4864	13.6052	13.8019	14.3242	13.486
P0C0L4	C4A	Complement C4-A	Undefined	4.67471e-16	15.3302	0	1.1741	14.1612	+	+	5.18152e-25	24.2855	0	1.34505	18.9586	+	+	0.0363172	1.43989	0.196877	0.24681	2.1231			8.04781e-10	9.09432	0	0.757229	6.71162	+	+	13.32	13.0166	13.1417	12.9592	13.7603	13.7	12.9375	12.7815	13.871	12.9765	13.1781	12.4628	13.7362	14.3345	12.3395	12.6482	12.985	13.7776
Q9H6R3	ACSS3	Acyl-CoA synthetase short-chain family member 3, mitochondrial	Undefined	2.57185e-06	5.58976	0	1.16766	5.6037	+	+	4.93166e-14	13.307	0	0.779057	10.4271	+	+	0.000530968	3.27493	0.0146945	-0.759116	-3.59249	+	+	2.15916e-06	5.66572	9.23788e-06	0.72149	5.01582	+	+	12.4288	10.7547	10.6654	11.7417	12.6549	12.2983	11.8672	NaN	13.38	12.5909	13.3363	12.1761	12.2552	12.9408	NaN	11.9218	12.5132	12.9416
P05089	ARG1	Arginase-1	Undefined	0.00254631	2.59409	0.00344019	1.16097	3.26602	+	+	0.234062	0.630669	0.246193	0.315098	1.20422			8.12988e-06	5.08992	0.000564103	-1.51313	-4.71951	+	+	0.583426	0.234014	0.68554	0.162139	0.549969			12.9772	13.6605	14.6582	17.3853	17.3447	14.3206	13.6452	16.8086	13.3638	15.4494	13.3421	13.8747	11.0957	14.5233	15.6085	15.6893	16.8226	12.4917
P10253	GAA	Lysosomal alpha-glucosidase	Undefined	7.92564e-12	11.101	0	1.12788	10.0258	+	+	1.57501e-18	17.8027	0	1.09872	13.4246	+	+	0.113711	0.944196	0.353038	-0.154655	-1.59644			0.827492	0.0822363	0.884283	-0.0179199	-0.21843			12.6126	12.2325	12.531	12.127	12.9616	11.8891	11.7568	12.737	12.5009	13.355	12.2125	12.5667	12.4893	12.2715	12.9097	12.4015	12.3854	12.3818
Q7Z3C6	ATG9A	Autophagy-related protein 9A	Undefined	1.76837e-12	11.7524	0	1.12745	10.6082	+	+	1.53388e-18	17.8142	0	1.27795	13.4334	+	+	3.84567e-09	8.41503	0	0.456636	6.48485		+	0.0134672	1.87072	0.0252225	0.172771	2.51061		+	14.4864	13.79	13.3982	13.302	13.3255	13.8282	13.6619	12.8534	13.5507	13.3949	13.1841	13.5041	13.4714	13.5608	12.5876	13.5352	13.2256	13.419
P02792	FTL	Ferritin light chain	Undefined	1.58391e-09	8.80027	0	1.10917	8.09099	+	+	1.38894e-21	20.8573	0	1.25785	15.8742	+	+	0.831396	0.0801922	0.919129	-0.020745	-0.213492			7.17609e-12	11.1441	0	0.728325	7.65217	+	+	17.839	17.6242	17.4019	17.1554	17.346	17.7707	17.3338	17.3237	17.4118	17.6954	19.3899	17.5446	18.1702	18.0794	17.129	17.6756	18.1159	18.4426
Q9ULB1	NRXN1	Neurexin-1	Undefined	6.33639e-20	19.1982	0	1.10543	18.8711	+	+	7.1625e-24	23.1449	0	1.06516	17.8887	+	+	0.00466039	2.33158	0.060123	0.125242	2.89745			0.0887616	1.05177	0.139577	0.0637455	1.71677			14.7261	14.8603	14.9078	14.4727	14.6017	14.6582	14.5781	14.4893	14.8014	14.4921	14.6128	14.5148	14.8502	14.6418	14.6975	14.5863	14.5065	14.594
P40121	CAPG	Macrophage-capping protein	Undefined	6.74055e-13	12.1713	0	1.10118	10.9921	+	+	1.15053e-25	24.9391	0	1.28046	19.5929	+	+	0.00177567	2.75064	0.0328872	0.281117	3.21533		+	1.42989e-13	12.8447	0	0.849733	8.40719	+	+	14.4508	13.5053	13.4093	13.6532	14.0514	13.8057	13.2987	13.7492	13.4779	14.0872	14.9161	13.159	13.9185	14.7407	13.3876	14.1397	14.1082	14.8449
Q06481	APLP2	Amyloid beta precursor like protein 2	Neuron	6.37083e-12	11.1958	0	1.0999	10.1095	+	+	7.25177e-15	14.1396	0	1.15683	10.7815	+	+	0.000293747	3.53203	0.00957395	0.759398	3.76448	+	+	0.00206555	2.68496	0.00441132	0.553797	3.15643		+	12.4452	12.2946	13.9143	13.4845	13.5776	13.5376	13.281	13.4085	13.5601	13.2837	13.0287	13.8179	13.9125	13.6267	12.6169	13.0071	12.9415	12.53
P05362	ICAM1	Intercellular adhesion molecule 1	Undefined	1.3316e-10	9.87563	0	1.09173	9.28988	+	+	3.68349e-16	15.4337	0	0.987631	11.6838	+	+	0.0770487	1.11323	0.289811	0.477835	1.79273			5.30245e-07	6.27552	1.06383e-05	1.21071	5.38175	+	+	13.0412	11.9524	12.5975	13.1892	11.543	13.1323	13.0887	12.1176	10.61	13.6221	14.0586	12.5018	12.7597	13.482	11.5863	11.8405	12.5694	13.1371
P62081	RPS7	40S ribosomal protein S7	Undefined	1.08493e-05	4.9646	1.06101e-05	1.08988	5.15383	+	+	0.165707	0.78066	0.176468	0.25483	1.40755			1.58888e-06	5.79891	0.000210169	-1.00958	-5.11727	+	+	0.00144561	2.83995	0.00321429	0.634842	3.26722	+	+	15.6736	15.0205	11.1973	16.9125	16.9449	14.4182	13.9928	16.6205	14.9263	15.4694	14.7187	14.424	14.1248	NaN	15.8159	13.9891	15.7354	14.4389
Q8NHP8	PLBD2	Putative phospholipase B-like 2	Undefined	9.46411e-08	7.02392	0	1.08685	7.20645	+	+	0.181097	0.742089	0.192297	0.413788	1.3571			0.194592	0.710876	0.460586	0.138121	1.30898			0.0278558	1.55508	0.0493351	0.367838	2.23513		+	14.0895	13.8055	14.0515	14.4787	14.8735	13.6026	13.8395	14.8723	14.1501	14.7966	7.73999	13.8228	13.5399	14.369	13.5687	13.1291	13.5418	13.7417
P14136	GFAP	Glial fibrillary acidic protein	Undefined	3.54021e-13	12.451	0	1.07971	11.2527	+	+	3.01729e-22	21.5204	0	1.03955	16.441	+	+	2.95902e-06	5.52885	0.000314961	0.588853	4.9667	+	+	2.98027e-23	22.5257	0	1.76373	12.592	+	+	21.588	19.9221	20.4172	21.5493	21.4486	20.9014	19.8789	20.7348	21.1056	22.3554	23.3337	20.2125	21.134	22.2591	19.7315	20.969	20.5286	22.3492
Q9UNK0	STX8	Syntaxin-8	Undefined	3.4353e-09	8.46404	0	1.06771	7.8216	+	+	1.76367e-12	11.7536	0	0.636889	9.19069	+	+	1.19752e-07	6.92172	8.98876e-06	-0.779334	-5.72153	+	+	6.91592e-08	7.16015	0	0.505632	5.77394		+	12.5759	12.3736	12.8291	13.1937	12.5347	12.8395	12.2657	12.0387	12.4782	12.3634	12.9724	12.4364	12.8357	12.4505	12.926	12.2181	12.2046	12.3703
Q92542	NCSTN	Nicastrin	Undefined	7.43986e-08	7.12844	0	1.05426	6.82598	+	+	1.39226e-08	7.85628	0	1.03891	6.74182	+	+	2.65905e-05	4.57527	0.00152428	-0.674798	-4.42358	+	+	0.880457	0.0552918	0.920666	0.0251297	0.150743			11.2599	11.567	11.4754	12.6174	13.6464	13.8111	13.603	13.2645	13.7042	13.9374	14.0243	14.3515	13.2892	13.6538	14.007	13.5448	13.3179	13.819
P10909	CLU	Clusterin	Undefined	4.97209e-17	16.3035	0	1.03644	15.2502	+	+	2.86349e-15	14.5431	0	1.249	11.0595	+	+	4.66901e-09	8.33077	0	0.404959	6.44272		+	3.47399e-08	7.45917	0	0.345232	5.92323		+	14.8956	14.5959	14.9735	14.7514	15.2707	15.2416	14.4501	14.487	14.89	14.8494	15.3527	14.6387	15.2069	14.9514	14.3928	14.9581	14.7143	14.8659
Q8N4L2	PIP4P2	Type 2 phosphatidylinositol 4,5-bisphosphate 4-phosphatase	Undefined	1.43084e-05	4.84441	1.04439e-05	1.02684	5.37118	+	+	0.0023137	2.63569	0.00183849	0.635345	3.26024	+	+	0.0303361	1.51804	0.178448	-0.331004	-2.20809			0.278377	0.555366	0.371472	-0.19437	-1.09056			12.4175	11.6797	NaN	NaN	12.2516	12.0847	13.38	13.0816	NaN	11.651	11.8201	12.3805	14.1554	11.2473	12.3176	12.608	10.8832	11.0069
Q9NP58	ABCB6	ATP-binding cassette sub-family B member 6	Undefined	0.00234846	2.62922	0.00314078	1.0055	3.84094	+	+	0.00191977	2.71675	0.00147176	0.783807	3.54449	+	+	0.0325043	1.48806	0.18528	-0.438509	-2.21724			0.00120546	2.91885	0.0026409	-0.575942	-3.44219		+	10.5332	NaN	9.76855	NaN	NaN	10.917	11.023	NaN	NaN	11.0952	11.4482	11.6224	11.1931	12.1639	NaN	NaN	NaN	9.58011
Q6IAA8	LAMTOR1	Ragulator complex protein LAMTOR1	Undefined	1.31052e-14	13.8826	0	1.00078	12.6444	+	+	1.86295e-14	13.7298	0	0.974017	10.5021	+	+	3.41753e-11	10.4663	0	-0.539051	-7.4862		+	0.264438	0.577676	0.354876	-0.0794192	-1.12153			12.6279	12.9802	12.849	13.1869	12.8902	13.4441	12.5917	12.9339	13.1126	12.9705	13.6617	12.6662	12.9214	12.8825	12.5024	12.947	12.8409	12.8957
P02745	C1QA	Complement C1q subcomponent subunit A	Undefined	0.000509876	3.29254	0.000784074	0.974076	3.89449	+	+	0.00236601	2.62598	0.0018781	0.555839	3.21817		+	0.000847052	3.07209	0.020179	-0.820294	-3.46151	+	+	0.71667	0.144681	0.79722	0.0673734	0.363941			11.3474	15.0612	9.39966	13.2065	16.1245	13.4909	NaN	16.6192	12.1263	14.2326	12.3796	13.2201	12.6985	13.3375	13.6751	13.6324	NaN	13.3485
Q9NRX5	SERINC1	Serine incorporator 1	Neuron	0.000187963	3.72593	0.000405063	0.97099	4.34761	+	+	2.65907e-05	4.57527	4.41014e-06	0.805698	4.81273	+	+	0.887202	0.0519775	0.946344	-0.0245543	-0.142412			0.0254253	1.59473	0.0450646	-0.385924	-2.28234		+	11.689	12.4516	NaN	NaN	11.5964	11.315	10.4917	10.1984	11.6578	10.8278	10.8249	11.448	11.7267	11.7277	NaN	11.2326	NaN	11.5352
Q9UM22	EPDR1	Mammalian ependymin-related protein 1	Undefined	6.35004e-11	10.1972	0	0.966104	9.24473	+	+	5.99665e-16	15.2221	0	1.05792	11.5341	+	+	1.22872e-08	7.91055	1.19048e-05	0.519873	6.23109		+	0.428039	0.368516	0.532489	0.0599177	0.795416			15.0182	15.4381	15.2667	14.8532	14.8939	14.9826	15.2646	15.1244	14.8795	15.0863	14.2752	15.1467	14.9602	15.1368	15.371	15.3457	15.0134	14.5628
P0C869-6	PLA2G4B	Cytosolic phospholipase A2 beta	Undefined	0.0117405	1.93031	0.0157308	0.960167	3.57308	+	+	7.58585e-06	5.12	4.90196e-06	0.31784	5.1213		+	5.1008e-05	4.29236	0.00249135	-1.19068	-4.45889	+	+	0.00162661	2.78872	0.00361052	0.52781	3.2651		+	10.4543	10.7348	NaN	11.8693	11.0198	12.0151	11.0545	10.6434	10.9598	10.9985	10.8269	10.9868	11.5812	10.745	10.8342	11.3264	11.2298	10.6686
P14317	HCLS1	Hematopoietic lineage cell-specific protein	Undefined	0.00249208	2.60344	0.00339277	0.958466	3.7362	+	+	0.0211608	1.67447	0.0199179	1.11116	2.45355	+	+	0.244414	0.611875	0.514393	-0.247481	-1.18019			0.38298	0.416824	0.485295	-0.528115	-0.879208			NaN	NaN	14.2902	0.857693	12.2441	13.168	13.1122	11.1931	11.9394	12.1388	NaN	13.4052	13.6646	NaN	11.4836	1.00444	11.1502	NaN
P02746	C1QB	Complement C1q subcomponent subunit B	Undefined	1.29815e-08	7.88668	0	0.955123	7.36534	+	+	3.77442e-09	8.42315	0	0.984557	7.10063	+	+	0.0161595	1.79157	0.125901	0.346545	2.44946			0.00328643	2.48328	0.0069539	0.383752	3.00533		+	15.2158	15.2489	15.4073	15.1686	14.3937	15.7904	14.2599	14.4938	14.4561	14.8075	14.6149	14.3445	15.0808	14.9815	14.1245	14.5192	14.4553	14.3382
P81605	DCD	Dermcidin	Undefined	0.0363107	1.43997	0.0497462	0.937034	2.17701	+	+	0.129937	0.886267	0.138443	0.455599	1.53872			0.00109171	2.96189	0.0238515	-1.29682	-3.36777	+	+	0.850278	0.0704392	0.899375	-0.0694811	-0.189197			14.3947	15.655	14.7988	17.5612	16.8611	16.8296	15.4923	16.8818	14.5828	14.2222	12.7868	12.5873	12.1587	13.1957	13.4341	15.3437	17.2457	11.8982
O00560-2	SDCBP	Syntenin-1	Undefined	1.00624e-09	8.9973	0	0.926976	8.25023	+	+	4.81595e-11	10.3173	0	0.593265	8.30763	+	+	0.000127857	3.89328	0.005303	-0.413274	-3.99275		+	0.0006034	3.21939	0.00132579	0.272076	3.53039		+	11.8694	12.3067	12.0361	11.3514	11.6102	12.3104	12.2062	11.6949	11.4302	11.1858	11.4985	12.1356	11.9957	11.8934	12.1359	11.6423	12.0199	11.3082
P11279	LAMP1	Lysosome-associated membrane glycoprotein 1	Undefined	6.56724e-06	5.18262	0	0.908763	5.29499	+	+	2.49414e-13	12.6031	0	0.884809	9.74763	+	+	0.000545277	3.26338	0.0149878	0.399707	3.57774		+	1.73516e-09	8.76066	0	0.680849	6.55407	+	+	15.0444	15.1763	14.7348	15.5356	15.5335	15.2832	14.7156	15.5204	14.8895	14.2901	14.4361	14.5757	14.6608	14.6366	15.1646	15.3427	15.4992	14.2369
P02788	LTF	Lactotransferrin	Undefined	0.00301016	2.52141	0.00393503	0.906238	3.19545	+	+	0.00898211	2.04662	0.00801319	0.460386	2.71668		+	0.00336693	2.47277	0.0492535	-0.658242	-3.0079	+	+	0.574775	0.240502	0.677641	0.106217	0.562699			14.2366	14.2072	13.6813	15.6024	16.0579	14.0162	13.5239	15.6027	12.9795	14.2228	13.4398	12.8846	13.6104	15.7552	13.8347	14.4657	15.269	13.3161
P17661	DES	Desmin	Undefined	1.76579e-05	4.75306	1.00756e-05	0.894081	4.96823	+	+	1.02193e-06	5.99058	0	0.698622	5.58258	+	+	0.209329	0.67917	0.476686	0.347403	1.26398			1.04672e-05	4.98017	2.98507e-05	1.07662	4.62048	+	+	14.3196	12.5356	14.5145	15.4262	15.8695	14.2041	12.9736	15.1297	13.8616	14.5627	15.5774	14.8507	13.9737	15.3239	15.1676	14.3245	14.6988	14.0922
Q96QA5	GSDMA	Gasdermin-A	Undefined	0.0185809	1.73093	0.0248183	0.884491	2.494	+	+	0.142953	0.844807	0.152593	0.320655	1.49218			0.393121	0.405474	0.64514	-0.283771	-0.858093			0.291279	0.535691	0.386986	0.279281	1.06066			12.0822	12.2547	12.9156	13.3339	13.6728	13.8926	12.0719	15.7979	12.6771	14.063	12.3051	13.1935	10.7992	13.4898	14.904	15.0007	15.4568	13.893
O95295	SNAPIN	SNARE-associated protein Snapin	Undefined	1.51144e-10	9.82061	0	0.883269	9.24006	+	+	7.01196e-11	10.1542	0	0.945014	9.67505	+	+	0.00339597	2.46904	0.0495032	-0.300888	-3.01735		+	0.0712899	1.14697	0.1163	-0.178315	-1.82732			12.5422	NaN	12.2407	12.3957	12.3684	12.2866	12.3961	12.6311	11.7343	12.5083	11.7894	12.0325	12.0857	12.6424	NaN	12.0925	12.2514	12.7871
Q9BTU6	PI4K2A	Phosphatidylinositol 4-kinase type 2-alpha	Undefined	0.000221673	3.65429	0.000454707	0.866942	4.31189	+	+	7.61698e-13	12.1182	0	1.37288	9.95753	+	+	0.000224511	3.64876	0.00787197	-0.577428	-3.87755		+	0.0130261	1.88519	0.0245298	-0.439634	-2.53124		+	10.0657	12.9505	NaN	10.4494	9.25916	10.3134	8.5597	8.56485	11.1519	9.88984	9.90704	12.5298	9.92807	11.1412	11.8742	11.1131	10.9133	11.1376
Q96B45	BORCS7	BLOC-1-related complex subunit 7	Undefined	0.01289	1.88975	0.0172591	0.866582	2.62084	+	+	6.90694e-05	4.16071	3.66599e-05	0.587576	4.34097	+	+	0.0163331	1.78693	0.126726	-0.584995	-2.44535			0.0790394	1.10216	0.126266	0.260632	1.77274			13.4	13.0582	8.79839	14.0237	12.7474	13.6278	14.0096	13.5748	13.7683	12.9524	13.6146	13.5833	13.8035	13.6633	14.1239	12.9736	14.8654	13.5185
P54803	GALC	Galactocerebrosidase	Undefined	1.47124e-05	4.83232	1.03359e-05	0.857615	5.76894	+	+	0.377419	0.423176	0.395377	-0.684154	-0.902719			0.582049	0.23504	0.776596	0.140632	0.554401			0.495658	0.304818	0.59955	-0.309355	-0.686462			14.1037	9.62635	14.5666	13.0752	NaN	14.2852	NaN	NaN	NaN	14.0595	14.0636	10.6184	12.1456	14.0631	NaN	14.1442	8.55759	14.5699
P52566	ARHGDIB	Rho GDP-dissociation inhibitor 2	Undefined	8.86706e-05	4.05222	9.44882e-05	0.855909	4.44607	+	+	5.78726e-12	11.2375	0	1.10979	8.90389	+	+	0.530449	0.275356	0.743011	0.103326	0.62973			0.00257724	2.58885	0.00544891	0.3745	3.08602		+	13.6757	12.6846	13.1567	13.2907	15.7556	14.218	14.1433	15.1013	14.1795	14.2948	13.7628	13.395	14.2074	14.1648	13.9204	14.1973	12.9832	13.9303
P51809	VAMP7	Vesicle-associated membrane protein 7	Undefined	0.000705992	3.1512	0.00100146	0.846066	3.74847	+	+	2.44757e-08	7.61126	0	1.08536	6.68621	+	+	0.492334	0.30774	0.71723	-0.119533	-0.689418			0.122395	0.912236	0.185949	0.229983	1.55748			14.5806	14.9521	14.1816	13.1812	13.9134	12.6497	12.5852	12.0372	13.0929	12.6067	13.6315	13.255	13.1572	13.3763	13.4133	12.2603	12.2954	12.791
P05114	HMGN1	Non-histone chromosomal protein HMG-14	Undefined	0.000827647	3.08216	0.00118582	0.842477	3.70304	+	+	2.17786e-12	11.662	0	1.01792	9.35043	+	+	0.833734	0.0789724	0.919429	0.0486081	0.210561			0.823518	0.0843269	0.880804	-0.045727	-0.223597			10.4781	12.492	8.06158	11.2927	10.4337	9.24081	9.76127	12.4336	12.191	10.8399	11.9356	12.0127	12.3616	11.4836	11.5849	11.9773	11.0382	11.5447
P07355	ANXA2	Annexin A2	Undefined	0.00690725	2.1607	0.00878629	0.837541	2.87062	+	+	0.000725207	3.13954	0.000524645	0.588263	3.59312	+	+	0.0163688	1.78598	0.126825	-0.597013	-2.44358			0.0799108	1.09739	0.127621	0.360004	1.7671			13.5159	13.0211	13.0405	15.6197	15.8326	13.4421	12.8125	15.2667	12.9044	14.5388	13.8474	13.1194	12.0998	14.0933	15.7496	15.0861	15.207	13.5052
Q0VGL1	LAMTOR4	Ragulator complex protein LAMTOR4	Undefined	1.23645e-11	10.9078	0	0.818965	9.85631	+	+	3.03564e-18	17.5177	0	0.874808	13.2085	+	+	3.66689e-05	4.4357	0.00192326	-0.359218	-4.32971		+	0.679497	0.167812	0.764295	0.0300601	0.414221			13.9625	14.0069	14.3987	14.0776	13.8308	14.0609	13.8437	13.6537	14.0555	13.9091	14.4741	13.9556	14.0945	13.9629	14.0218	14.0716	13.8448	14.304
Q9BXJ3	C1QTNF4	Complement C1q tumor necrosis factor-related protein 4	Undefined	3.09873e-06	5.50882	0	0.796338	5.63851	+	+	0.779006	0.108459	0.800021	-0.116154	-0.282991			0.732914	0.134947	0.864808	-0.0589071	-0.342507			0.679896	0.167557	0.764493	-0.10094	-0.414156			13.9537	13.4653	14.0315	11.0545	15.749	13.4402	12.2368	NaN	13.7	14.3363	8.37091	13.8155	12.0038	14.5968	NaN	13.8482	16.0547	13.2112
P08670	VIM	Vimentin	Undefined	1.11083e-12	11.9544	0	0.795417	10.7923	+	+	5.5525e-23	22.2555	0	0.962125	17.0854	+	+	8.62742e-10	9.06412	0	0.436427	6.80639		+	1.53688e-16	15.8134	0	0.767111	9.69596	+	+	16.6741	15.9428	15.938	16.6575	16.8843	16.3097	15.5876	16.6062	16.3586	17.3485	18.0008	16.5999	16.4879	17.0998	15.7306	16.271	16.062	17.0333
Q9NVJ2	ARL8B	ADP-ribosylation factor-like protein 8B	Undefined	1.02527e-08	7.98916	0	0.7931	7.44579	+	+	4.26344e-17	16.3702	0	1.12097	12.3572	+	+	0.0060967	2.21491	0.0712647	0.178561	2.80467			0.244193	0.612268	0.332341	0.0643499	1.17067			15.1906	15.2393	14.6855	14.8213	14.8843	14.9195	14.8858	14.8043	15.0909	15.2154	14.9495	14.7517	14.8432	15.0986	14.6838	15.1405	14.9546	15.0507
Q96BM9	ARL8A	ADP-ribosylation factor-like protein 8A	Undefined	8.49117e-07	6.07103	0	0.783241	5.96865	+	+	2.27841e-11	10.6424	0	0.934978	8.4749	+	+	0.162856	0.788197	0.42073	-0.170779	-1.40644			0.00976569	2.0103	0.0188189	0.262539	2.62902		+	13.2812	13.7578	13.576	13.1365	13.4884	14.2545	13.5378	12.7146	13.5554	13.2936	13.9191	12.9389	13.9179	13.7286	13.7168	13.4832	13.4184	13.8433
O14662	STX16	Syntaxin-16	Undefined	0.000936737	3.02838	0.00130748	0.767998	3.64568	+	+	1.51355e-08	7.82	0	0.553971	6.69553		+	3.04245e-05	4.51678	0.00167157	-0.988442	-4.38575	+	+	4.52261e-06	5.34461	1.69133e-05	0.731208	4.81915	+	+	11.3735	11.3931	12.7535	12.6159	12.8603	12.6648	12.0695	11.8315	12.7458	12.245	13.3752	12.9508	12.805	12.4627	11.026	12.3385	12.2381	12.9472
P06858	LPL	Lipoprotein lipase	Undefined	0.00829325	2.08128	0.0107777	0.758998	2.92927	+	+	0.394484	0.403971	0.41258	-0.271163	-0.86935			0.55943	0.252255	0.761896	-0.153967	-0.586621			0.0129377	1.88814	0.0243528	0.67766	2.5455	+	+	11.977	12.2569	12.3612	NaN	NaN	NaN	NaN	12.9854	NaN	14.102	NaN	NaN	12.6933	12.6049	12.9771	14.852	14.9689	13.0062
Q9BT88	SYT11	Synaptotagmin-11	Neuron	1.7047e-08	7.76835	0	0.74644	7.27273	+	+	2.59852e-14	13.5853	0	0.870797	10.4042	+	+	0.0827134	1.08242	0.300457	-0.156454	-1.75366			0.798935	0.0974888	0.864131	-0.019514	-0.255333			12.8951	13.1938	13.3946	13.8555	14.2708	13.2395	13.1295	13.6146	13.4572	13.0904	13.5157	13.2992	13.4819	13.3351	13.5964	13.2871	13.4199	12.7016
P07858	CTSB	Cathepsin B	Undefined	8.0593e-08	7.0937	0	0.735401	6.74963	+	+	2.23836e-15	14.6501	0	0.658506	11.1337	+	+	0.0495746	1.30474	0.231332	0.226683	1.98876			1.50675e-05	4.82196	3.57782e-05	0.312803	4.52407		+	15.4132	15.9786	15.2743	15.2365	15.6796	15.0961	15.5935	15.5426	15.3379	15.7042	15.183	15.5668	15.2439	15.7938	15.2431	15.9083	15.6411	15.5742
Q9UHL4	DPP7	Dipeptidyl peptidase 2	Undefined	9.8978e-05	4.00446	9.32039e-05	0.723049	4.48608	+	+	0.000492083	3.30796	0.000354256	1.02113	3.77073	+	+	0.300577	0.522044	0.568226	-0.122286	-1.0417			0.666672	0.176088	0.752882	0.105112	0.432039			13.0901	13.0502	2.41432	14.1168	11.5538	13.2073	14.7847	13.6469	13.6568	13.9575	13.4677	13.2629	NaN	13.3575	13.1379	12.3447	12.9228	12.9397
Q07954	LRP1	Prolow-density lipoprotein receptor-related protein 1	Undefined	1.65816e-12	11.7804	0	0.716838	10.6336	+	+	3.40243e-25	24.4682	0	0.66618	19.1343	+	+	9.07475e-05	4.04217	0.0040043	0.126101	4.08691		+	0.357945	0.446183	0.459103	-0.0254746	-0.923055			14.4939	14.3691	14.4458	14.0158	14.1633	14.229	14.2789	14.3144	14.2307	14.3269	14.3059	14.4233	14.2677	14.3334	14.2396	14.1769	14.2467	14.1585
P00450	CP	Ceruloplasmin	Undefined	2.38305e-08	7.62287	0	0.716685	7.27703	+	+	4.29491e-15	14.367	0	0.69886	11.1851	+	+	0.0203804	1.69079	0.143248	0.307993	2.36061			0.00325414	2.48756	0.00689618	0.335052	3.01047		+	11.9072	11.2293	11.5996	12.886	13.4203	12.6169	12.5641	12.1831	12.6578	12.5972	12.3053	11.7309	12.3899	12.9214	NaN	12.4197	12.3346	12.0007
P51790	CLCN3	H(+)/Cl(-) exchange transporter 3	Undefined	8.93767e-07	6.04878	0	0.711976	5.98759	+	+	1.13036e-08	7.94678	0	0.757217	6.82426	+	+	0.00748453	2.12584	0.0798725	-0.336505	-2.73367			0.0075828	2.12017	0.0150087	0.310019	2.7203		+	11.1529	13.5096	14.4916	12.7676	12.864	13.3683	13.0044	12.3071	12.8279	12.6018	13.3979	13.0246	13.4723	12.9019	NaN	12.6525	12.6298	13.2581
Q92563	SPOCK2	Testican-2	Neuron	0.000595351	3.22523	0.000858859	0.707345	4.20486	+	+	0.473498	0.324682	0.493764	0.22647	0.729323			0.66836	0.17499	0.832067	0.0857212	0.431942			0.661118	0.179721	0.747872	-0.163487	-0.441497			14.3951	NaN	NaN	NaN	13.5175	13.6876	13.8714	13.6861	10.8732	NaN	NaN	12.1049	NaN	13.9122	13.9876	NaN	13.5812	14.1225
P26038	MSN	Moesin	Undefined	1.03655e-13	12.9844	0	0.706836	11.7596	+	+	6.87922e-23	22.1625	0	1.10126	17.0029	+	+	5.66478e-09	8.24682	0	0.307023	6.40065		+	1.48467e-13	12.8284	0	0.437296	8.40002		+	16.4066	16.1025	15.7251	16.0241	16.3633	16.1946	15.7629	15.835	15.9881	16.3693	16.6156	15.695	16.0533	16.4886	15.8655	16.1597	15.6583	16.4943
O00468-6	AGRN	Agrin	Undefined	1.01645e-10	9.99292	0	0.701791	9.07217	+	+	3.712e-12	11.4304	0	0.453961	8.98115		+	8.26766e-08	7.08262	9.43396e-06	0.338691	5.8057		+	3.30729e-07	6.48053	1.15274e-05	0.366965	5.4272		+	15.2202	15.0597	14.7034	14.8519	15.0078	14.8687	14.5612	14.79	14.8507	15.6156	15.2274	14.9405	15.0178	14.9975	14.168	14.8549	14.6969	15.1021
Q9UEU0	VTI1B	Vesicle transport through interaction with t-SNAREs homolog 1B	Undefined	1.38117e-10	9.85975	0	0.697056	8.96045	+	+	5.2769e-16	15.2776	0	0.691693	11.5733	+	+	0.00127577	2.89423	0.0266181	0.150782	3.32051		+	0.289495	0.538359	0.384931	-0.0420808	-1.06427			13.2574	13.4442	13.2233	13.1885	12.9107	13.4467	13.1555	13.4777	13.0009	13.2056	13.3842	13.3124	13.0901	13.1116	12.9594	13.3309	13.0792	13.3217
Q99435	NELL2	Protein kinase C-binding protein NELL2	Undefined	1.0804e-05	4.96641	1.06383e-05	0.696364	5.13073	+	+	7.21931e-11	10.1415	0	0.675534	8.1561	+	+	0.00451141	2.34569	0.0590625	-0.256798	-2.90854			0.187577	0.726821	0.269114	0.101492	1.32581			14.299	13.6943	13.9265	14.0704	13.6838	14.0895	13.9818	13.5904	13.9663	13.4402	14.101	13.7955	14.2179	13.7435	13.6384	14.1527	13.503	13.5457
Q96QE2	SLC2A13	Proton myo-inositol cotransporter	Neuron	7.81886e-07	6.10686	0	0.692223	5.99585	+	+	2.07452e-09	8.68308	0	0.6686	7.35908	+	+	0.0864836	1.06307	0.30752	0.154183	1.73201			0.000629204	3.20121	0.00138117	0.270581	3.52086		+	13.6046	14.1463	13.1683	13.7679	13.5142	14.115	13.6978	13.4751	13.6818	13.2059	13.1161	13.9515	13.4847	13.6403	13.7153	13.5322	13.3448	13.082
P05067	APP	Amyloid-beta precursor protein	Undefined	1.15907e-11	10.9359	0	0.68692	9.88085	+	+	7.09836e-14	13.1488	0	0.820027	10.1107	+	+	4.19821e-10	9.37694	0	0.432163	6.95963		+	0.741872	0.129671	0.817583	-0.0182504	-0.330184			13.6452	13.3551	13.0158	13.1223	13.2487	13.4041	13.3805	13.1592	13.271	13.0784	13.0689	13.3783	13.2997	13.3245	13.1201	13.1751	13.3447	12.8835
P08294	SOD3	Extracellular superoxide dismutase	Undefined	4.90051e-09	8.30976	0	0.685756	7.69894	+	+	8.59913e-20	19.0655	0	0.853091	14.4068	+	+	0.0712423	1.14726	0.279046	-0.222037	-1.82414			4.89339e-09	8.31039	0	0.749326	6.33896	+	+	13.7402	13.1973	14.4471	13.5463	13.6317	14.0855	13.3179	13.0908	13.4575	13.4157	14.8729	13.8315	13.3683	14.2361	12.7522	13.2734	13.0828	14.0655
Q9UBP4	DKK3	Dickkopf-related protein 3	Neuron	2.26584e-14	13.6448	0	0.685245	12.4062	+	+	1.19149e-15	14.9239	0	0.66187	11.3246	+	+	0.000142795	3.84529	0.00579324	0.274773	3.9621		+	2.0356e-07	6.69131	1.21212e-05	0.368295	5.53593		+	15.5339	15.4397	15.4609	15.2534	15.6951	15.6768	15.261	14.8856	15.275	15.2263	15.6652	15.3833	15.5802	15.1788	14.8072	15.286	15.3783	15.4262
Q9NZM3	ITSN2	Intersectin-2	Undefined	1.61908e-06	5.79073	0	0.679526	5.82418	+	+	0.298363	0.525256	0.314791	0.0825574	1.05479			7.25091e-06	5.13961	0.000507205	-0.466355	-4.7572		+	0.10488	0.979307	0.162013	-0.139738	-1.63592			11.7139	11.6206	11.9632	10.9096	10.8844	11.3362	11.098	11.5834	11.3207	11.5705	11.2914	12.2887	11.5016	11.3557	11.894	11.0842	10.9714	11.093
Q92581	SLC9A6	Sodium/hydrogen exchanger 6	Undefined	1.92204e-06	5.71624	0	0.679393	5.69955	+	+	2.20956e-12	11.6557	0	0.614776	9.1271	+	+	0.0222322	1.65302	0.149746	-0.230609	-2.32404			0.000273771	3.56261	0.000680307	0.269106	3.7569		+	13.2791	13.397	13.1787	13.0959	13.3185	13.128	13.0368	13.2623	13.075	12.9969	13.0818	13.2551	13.1585	13.3216	13.0577	13.0883	12.6535	13.0492
P07602	PSAP	Prosaposin	Undefined	5.64714e-07	6.24817	0	0.678499	6.10322	+	+	5.17454e-18	17.2861	0	0.77653	13.0342	+	+	0.422956	0.373705	0.668186	0.0942638	0.804744			1.62121e-06	5.79016	9.54654e-06	0.447309	5.06252		+	16.5369	16.7684	15.8736	15.6012	16.2072	16.8153	16.0452	15.8687	16.5499	16.5344	15.9673	15.1651	15.9446	16.2101	15.7769	16.4714	16.0827	16.3844
Q9BQT9	CLSTN3	Calsyntenin-3	Ex	6.84859e-08	7.1644	0	0.677818	6.90797	+	+	1.73423e-09	8.76089	0	0.878859	7.48182	+	+	0.499115	0.301799	0.721694	0.0647439	0.678628			0.261805	0.582022	0.352684	0.132926	1.12832			14.22	13.0097	13.1761	14.3502	14.5353	NaN	15.6542	16.0727	16.2605	16.0676	16.5488	15.8067	16.255	16.2284	15.3917	15.9122	16.7773	16.6367
P01591	JCHAIN	Immunoglobulin J chain	Undefined	8.09953e-05	4.09154	8e-05	0.676806	4.4599	+	+	5.06599e-12	11.2953	0	0.768249	8.89393	+	+	0.193088	0.714245	0.458684	0.227624	1.31079			0.272526	0.564592	0.364711	0.177006	1.10269			12.615	13.1789	14.0599	14.7217	14.3192	14.2968	13.7457	14.555	13.441	12.8811	13.6025	13.1191	12.9088	14.0465	13.4467	14.5814	14.6209	12.6991
O75037	KIF21B	Kinesin-like protein KIF21B	Undefined	0.0156948	1.80424	0.0209589	0.672487	2.68385	+	+	0.0546252	1.26261	0.0559804	0.365356	1.98846			3.15608e-06	5.50085	0.000319249	-2.02881	-5.08645	+	+	0.00498866	2.30202	0.0101585	-0.780498	-2.8848	+	+	11.9562	10.5258	11.2757	12.1878	12.4899	11.1368	10.0605	12.2399	12.7755	13.0905	13.9169	NaN	12.4032	13.3908	10.6293	12.2239	12.8709	12.7534
P01024	C3	Complement C3	Mic	1.22774e-14	13.9109	0	0.661991	12.673	+	+	1.27053e-25	24.896	0	0.852599	19.5506	+	+	2.24199e-07	6.64937	1.69133e-05	0.393064	5.5778		+	0.00686864	2.16313	0.013591	0.154421	2.75369		+	14.6451	14.82	15.1226	15.0608	15.072	14.9703	14.7571	14.6239	14.7539	14.5675	14.7071	14.5124	15.0345	15.2539	14.4235	14.9616	15.0203	14.7437
Q15049	MLC1	Membrane protein MLC1	Undefined	0.000129631	3.88729	0.000120527	0.661256	4.33283	+	+	3.78464e-08	7.42198	0	0.432344	6.46672		+	4.80165e-05	4.31861	0.0023944	-0.799206	-4.2671	+	+	0.00520511	2.28357	0.0105518	0.340153	2.85157		+	12.6745	12.0851	11.0932	12.877	13.2382	12.5673	12.2771	11.4763	12.7367	13.3084	13.3225	12.5586	11.9815	12.7728	11.3985	12.5858	12.7559	12.7767
P07339	CTSD	Cathepsin D	Undefined	1.38215e-07	6.85944	0	0.661202	6.5697	+	+	4.34168e-23	22.3623	0	0.890136	17.1805	+	+	0.0873374	1.0588	0.308565	-0.130955	-1.72726			0.797081	0.0984974	0.862943	-0.0139612	-0.257734			16.9199	17.0656	16.5912	17.2991	17.3637	17.0884	16.9893	17.3722	17.2147	17.0803	17.0131	16.6432	17.0611	17.2926	16.9472	17.3516	17.0597	17.2882
P13473	LAMP2	Lysosome-associated membrane glycoprotein 2	Undefined	1.00749e-07	6.99676	0	0.659065	6.67508	+	+	1.20775e-11	10.918	0	0.509067	8.65129		+	5.4045e-11	10.2672	0	-0.754412	-7.39071	+	+	4.35328e-11	10.3612	0	0.586436	7.29774	+	+	14.277	14.1527	14.27	14.5852	14.4652	14.6848	13.7842	14.1738	14.1	14.4516	14.4026	13.8688	14.0832	14.0759	13.7899	14.0341	14.0393	14.4014
P04062	GBA1	Lysosomal acid glucosylceramidase	Undefined	0.00565932	2.24724	0.00709529	0.657422	3.00618	+	+	0.000315901	3.50045	0.000226619	0.537165	3.90941		+	0.294557	0.530831	0.562729	-0.193219	-1.05556			0.0647003	1.18909	0.106553	-0.315705	-1.86999			11.4556	13.6634	NaN	12.5733	13.2911	12.1431	11.1818	11.8022	11.7867	11.4481	13.6578	10.8777	9.4572	12.9293	12.9424	12.6519	12.9565	12.5306
Q14244	MAP7	Ensconsin	Oli	0.000425223	3.37138	0.000691824	0.654494	3.8928	+	+	9.62148e-09	8.01676	0	0.930045	6.81894	+	+	0.252212	0.598235	0.522578	0.165224	1.152			0.840197	0.0756187	0.892688	-0.0239497	-0.20211			13.7482	13.4794	13.7927	13.3602	13.2995	13.3946	13.0984	13.5315	13.3294	13.6014	12.9476	12.945	12.7119	11.2079	13.111	11.7626	12.8778	12.1218
Q96GS4	BORCS6	BLOC-1-related complex subunit 6	Undefined	3.40599e-05	4.46776	2.746e-05	0.654405	4.79145	+	+	4.01382e-07	6.39644	0	0.728184	5.90534	+	+	0.0229773	1.6387	0.152376	0.279288	2.31482			0.334606	0.475466	0.435339	0.123753	0.969511			11.9445	11.3912	14.8674	14.4297	11.2885	11.4269	12.7377	13.1595	12.9263	13.6374	13.1157	13.0894	13.2861	13.3418	12.3545	12.8595	12.6052	13.5354
P51693	APLP1	Amyloid beta precursor like protein 1	Undefined	3.72477e-10	9.4289	0	0.650468	8.60285	+	+	1.34272e-13	12.872	0	0.676788	9.92598	+	+	0.00393228	2.40536	0.0542873	0.285146	2.95509			0.336482	0.473039	0.436894	0.0642784	0.965248			14.7006	14.5766	13.9127	13.915	14.3369	14.352	14.4753	13.8737	14.3017	14.0329	13.9467	14.3757	14.6949	13.9368	14.1564	13.8093	14.2513	13.3905
P07998	RNASE1	Ribonuclease pancreatic	Undefined	5.23902e-05	4.28075	4.23729e-05	0.646399	4.68823	+	+	0.00333167	2.47734	0.00272174	0.367022	3.12199		+	0.0192177	1.7163	0.13869	0.393172	2.39156			0.0720246	1.14252	0.11745	-0.263954	-1.82113			13.248	14.0805	13.0566	NaN	NaN	13.0543	13.2706	12.4822	12.7835	13.0828	12.9739	14.0612	13.0186	13.0295	13.3076	12.4645	12.5373	NaN
Q8IV08	PLD3	5'-3' exonuclease PLD3	Neuron	6.54233e-10	9.18427	0	0.641681	8.40232	+	+	8.35239e-14	13.0782	0	0.689627	10.0634	+	+	0.0427073	1.3695	0.213842	0.15532	2.05387			0.0126578	1.89764	0.0238216	0.162013	2.53367		+	15.2508	15.3033	15.5139	15.0945	15.1972	14.815	15.0063	14.8324	15.1418	14.9897	15.2982	15.1188	14.901	15.5207	14.8805	15.128	15.1804	15.2356
Q13510	ASAH1	Acid ceramidase	Undefined	0.000142141	3.84728	0.000141791	0.636278	4.26962	+	+	7.96334e-18	17.0989	0	0.841411	12.8943	+	+	0.873753	0.0586114	0.940068	0.0206789	0.159318			0.077245	1.11213	0.123869	0.181574	1.78316			15.0666	15.4956	15.0805	15.2474	15.6005	14.9195	15.1961	15.4152	14.7398	15.4866	14.9573	14.5556	14.9317	15.3253	14.8277	15.1826	15.1039	15.3557
P04792	HSPB1	Heat shock protein beta-1	Undefined	1.46832e-05	4.83318	1.03627e-05	0.632328	5.02931	+	+	8.43577e-15	14.0739	0	0.645367	10.7365	+	+	0.272493	0.564644	0.541006	0.103023	1.10367			5.6554e-10	9.24754	0	0.593932	6.78348	+	+	17.1709	16.4582	16.3086	17.0761	17.5588	16.9427	15.9923	16.7792	16.6461	17.2114	17.517	16.4778	16.5435	17.0963	17.6219	17.2455	17.0254	17.0323
O14558	HSPB6	Heat shock protein beta-6	Undefined	5.67231e-11	10.2462	0	0.63146	9.28634	+	+	2.94021e-18	17.5316	0	0.842925	13.219	+	+	1.26693e-05	4.89725	0.000836957	0.458574	4.60465		+	1.33364e-10	9.87496	0	0.707559	7.07484	+	+	14.3394	13.7872	13.8486	14.229	14.4504	14.1419	13.3581	13.638	14.041	15.1461	14.7298	13.8765	14.0127	14.7764	13.5712	14.0918	13.7762	14.0707
P51793	CLCN4	H(+)/Cl(-) exchange transporter 4	Ex	3.04368e-06	5.5166	0	0.613398	5.54825	+	+	1.8248e-13	12.7388	0	0.864343	9.96239	+	+	4.92138e-09	8.30791	0	0.589308	6.4379	+	+	0.0352003	1.45345	0.0608889	0.172673	2.13214			13.6858	13.6046	13.2137	12.9728	12.9743	13.3588	13.1351	12.6336	13.219	13.0164	13.3607	13.3957	13.5158	13.3859	12.9019	13.0704	13.1817	13.216
P15311	EZR	Ezrin	Undefined	1.65158e-14	13.7821	0	0.607705	12.5434	+	+	3.03025e-19	18.5185	0	0.931688	13.9764	+	+	0.558622	0.252882	0.761466	0.0283806	0.586939			5.68234e-07	6.24547	1.05541e-05	0.273861	5.30457		+	16.4119	15.856	15.571	15.7112	15.8303	16.1573	15.699	15.598	15.785	16.0194	16.5165	15.6839	15.9905	16.1219	15.5907	16.0328	15.8176	16.2129
Q96T83	SLC9A7	Sodium/hydrogen exchanger 7	Undefined	0.00094102	3.0264	0.00131674	0.604155	3.71292	+	+	0.0106976	1.97071	0.00974206	0.696326	2.65841	+	+	0.104001	0.982961	0.336969	0.558967	1.64472			0.391663	0.407088	0.494616	0.28063	0.860297			11.9455	13.4335	11.2833	13.4934	11.7108	11.8102	10.8381	11.2465	13.6986	11.4565	13.9949	12.4425	12.2374	12.1416	11.4387	12.7024	12.3926	12.2588
P31949	S100A11	Protein S100-A11	Undefined	1.39277e-05	4.85612	1.04712e-05	0.598411	5.04679	+	+	5.39938e-11	10.2677	0	0.581397	8.23621		+	0.00016801	3.77466	0.00642643	0.395812	3.91674		+	0.00246702	2.60783	0.00519447	0.277948	3.09687		+	15.9366	15.2758	15.8251	16.1543	16.4426	15.507	15.1999	15.936	15.4965	15.6687	15.6399	14.9424	15.0525	15.7732	15.8334	15.9556	15.9321	15.4857
P01034	CST3	Cystatin-C	Ast	8.00377e-11	10.0967	0	0.587395	9.15966	+	+	4.28575e-17	16.368	0	0.798811	12.3556	+	+	0.000105664	3.97607	0.00456	0.365844	4.04527		+	0.163681	0.786001	0.238559	0.110933	1.40192			15.2626	15.4858	15.6945	14.6494	15.3422	15.1814	15.1385	14.9939	15.4589	15.1472	15.7568	15.3482	16.1989	14.9888	15.2406	14.7195	15.2738	14.643
Q9Y6R7	FCGBP	IgGFc-binding protein	Undefined	0.00132197	2.87878	0.00170302	0.586215	3.67687	+	+	0.000371094	3.43052	0.000282935	0.547096	3.9076		+	0.0869026	1.06097	0.308037	0.949981	1.73707			0.0751608	1.12401	0.121501	0.787439	1.80182			12.3915	11.7825	10.3186	11.2614	11.0208	11.87	10.5763	11.2533	11.8347	NaN	11.5885	10.2244	10.258	12.4953	10.2757	NaN	NaN	9.97812
Q96JN2	CCDC136	Coiled-coil domain-containing protein 136	Neuron	0.0147427	1.83142	0.0196254	-0.592303	-2.60555	+	+	0.988527	0.00501145	0.990051	0.0125961	0.0145186			0.4251	0.371509	0.669462	-0.177497	-0.801808			0.00039989	3.39806	0.000949398	-1.49056	-3.68109	+	+	9.03295	1.63422	NaN	12.3971	11.9265	10.2925	8.05773	12.8407	12.732	0.764713	11.2507	9.45997	8.86635	9.01233	1.51416	NaN	11.6163	12.4905
P05164	MPO	Myeloperoxidase	Undefined	0.0184753	1.73341	0.0247291	-0.624949	-3.43799	+	+	0.56029	0.251587	0.578866	-0.200083	-0.596613			0.850678	0.0702347	0.927738	0.146492	0.18939			0.38888	0.410184	0.492244	0.384418	0.86795			12.9192	NaN	NaN	NaN	14.3358	NaN	12.87	11.9611	10.4255	NaN	NaN	NaN	12.7134	12.4864	NaN	NaN	11.8757	NaN
Q9UPR0	PLCL2	Inactive phospholipase C-like protein 2	Ex	0.000416041	3.38086	0.00066877	-0.635128	-4.06794	+	+	0.000296962	3.5273	0.000217195	-0.585113	-4.22635	+	+	0.7902	0.102263	0.896969	0.0518152	0.267016			0.00336539	2.47297	0.00715473	-0.616002	-3.01824	+	+	12.2584	12.6804	10.9832	11.7145	11.3499	11.6146	11.8159	12.3475	12.3289	12.1614	11.1514	12.689	11.6648	11.9247	12.187	11.4698	11.6987	10.6274
Q13875	MOBP	Myelin-associated oligodendrocyte basic protein	Oli	3.2086e-07	6.49368	0	-0.644544	-6.47405	+	+	1.22244e-14	13.9128	0	-0.876702	-10.6265	+	+	0.362904	0.440208	0.621452	0.166421	0.914437			0.000171177	3.76655	0.000436562	0.544926	3.89138		+	14.2728	14.1503	11.7537	13.2816	12.4509	14.3198	13.128	13.7547	14.448	15.5972	14.2841	12.6021	13.25	14.6402	13.3447	14.9918	13.6214	14.844
P59665	DEFA1	Neutrophil defensin 1	Undefined	0.0014227	2.84689	0.00182338	-0.688038	-3.47297	+	+	0.0550801	1.25901	0.0563759	-0.248124	-1.96326			0.754711	0.122219	0.877584	0.0746237	0.313377			0.688585	0.162042	0.771947	0.0878896	0.401855			15.7641	16.0296	15.5012	16.303	16.8192	16.8073	15.6265	16.5503	15.3318	16.5156	14.8893	16.0524	16.7853	14.8132	15.7354	16.6498	16.2876	16.1312
O76094	SRP72	Signal recognition particle subunit SRP72	Undefined	0.0151582	1.81935	0.0201968	-0.705293	-2.56643	+	+	0.00321325	2.49306	0.00260553	-0.874803	-3.0958	+	+	0.398027	0.400087	0.648536	-0.371637	-0.848979			0.272584	0.564499	0.364629	0.390437	1.10251			12.6765	7.97807	9.08474	10.03	11.5443	13.4016	13.2144	13.6792	12.8003	13.6001	11.3748	12.8198	14.0557	11.5487	13.3533	9.88849	12.2643	11.8518
Q3ZCM7	TUBB8	Tubulin beta-8 chain	Undefined	0.0218131	1.66128	0.0296289	-0.731839	-2.40072	+	+	6.60943e-07	6.17984	0	-0.295546	-5.65931		+	6.58329e-07	6.18156	9.84848e-05	-0.847855	-5.32685	+	+	0.000414591	3.38238	0.000959233	-0.411508	-3.63867		+	14.7006	15.3251	14.0817	13.0409	14.2512	14.974	14.541	13.9319	13.8328	14.1306	14.1036	14.3401	14.4875	14.3326	15.2536	13.758	13.3734	13.3464
Q9Y342	PLLP	Plasmolipin	Undefined	0.000350747	3.45501	0.0006094	-0.768619	-4.45089	+	+	1.55828e-05	4.80736	4.64037e-06	-0.832417	-4.89761	+	+	0.851055	0.0700421	0.927741	-0.0459874	-0.188388			0.322093	0.492019	0.420602	-0.201863	-0.994903			13.1196	13.7427	14.7245	14.9331	13.6296	14.8244	12.9278	14.8915	13.0828	16.18	13.0569	13.9619	14.0496	12.4141	12.3448	14.9362	12.1839	13.3952
P60033	CD81	CD81 antigen	Undefined	0.00450557	2.34625	0.00576898	-0.780887	-3.04208	+	+	0.00271711	2.56589	0.00215567	-0.392729	-3.1486		+	3.02376e-06	5.51945	0.000314465	-1.00002	-4.96466	+	+	0.0373832	1.42732	0.0642226	-0.316873	-2.1064			16.0154	13.7819	12.2456	13.803	13.9991	13.4833	13.2856	13.5852	13.948	14.0767	13.6729	13.6828	14.002	14.1709	13.5571	13.5644	13.9518	13.5665
Q14832	GRM3	Metabotropic glutamate receptor 3	Undefined	0.0091123	2.04037	0.011938	-0.796603	-2.76104	+	+	0.0168202	1.77417	0.0157231	-0.445803	-2.47708		+	0.00178412	2.74858	0.032943	-0.453409	-3.21382		+	0.0032455	2.48872	0.00686679	-0.437013	-3.00767		+	12.2764	11.9295	10.4199	9.4852	12.558	12.5755	12.3749	12.5788	12.2979	12.6418	11.7179	12.3246	12.4459	12.3736	12.651	11.2629	12.3475	13.041
Q96RQ9	IL4I1	L-amino-acid oxidase	Undefined	1	0	0.998901	NaN	0			0.0270192	1.56833	0.0261538	6.52578	3.09456	+	+	0.203619	0.691183	0.469913	2.885	1.32219			0.59928	0.22237	0.697984	0.926839	0.533142			7.98068	0.651081	NaN	NaN	NaN	7.10341	NaN	NaN	NaN	7.22679	NaN	NaN	NaN	NaN	NaN	NaN	NaN	NaN
P0DPA2	VSIG8	V-set and immunoglobulin domain-containing protein 8	Undefined	0.63247	0.19896	0.702113	0.991623	0.651337			0.0333985	1.47627	0.0330767	4.36139	3.18427	+	+	0.0929481	1.03176	0.319022	2.51679	1.76011			0.796108	0.0990279	0.862172	-0.298134	-0.260776			NaN	12.5539	NaN	NaN	11.2182	NaN	NaN	NaN	NaN	NaN	NaN	NaN	NaN	12.5879	12.6856	NaN	NaN	NaN
Q86UX7	FERMT3	Fermitin family homolog 3	Undefined	0.0573926	1.24114	0.0776744	3.7261	2.34573			0.00072983	3.13678	0.000527546	2.30901	3.79305	+	+	0.00182122	2.73964	0.0333111	-4.3082	-3.39112	+	+	0.153827	0.812969	0.225846	-1.12032	-1.44609			NaN	NaN	NaN	9.18049	10.6445	7.74619	0.758921	12.9213	NaN	8.3141	NaN	NaN	NaN	9.25831	1.12527	8.26312	8.29181	NaN
Q96CG8	CTHRC1	Collagen triple helix repeat-containing protein 1	Undefined	1	0	0.994751	5.84476	0			0.000942329	3.0258	0.000711039	1.83563	4.25277	+	+	1	0	0.994137	1.09232	0			1	0	1	4.47725	0			NaN	NaN	NaN	NaN	NaN	11.7059	NaN	NaN	NaN	NaN	11.615	NaN	NaN	NaN	NaN	11.5078	11.0429	12.3711
P02743	APCS	Serum amyloid P-component	Undefined	0.964404	0.0157411	0.974379	0.0320411	0.0456547			3.57322e-06	5.44694	0	1.81556	5.98067	+	+	0.787148	0.103944	0.895499	-0.166499	-0.272715			0.00504356	2.29726	0.0102458	-1.37164	-2.977	+	+	NaN	NaN	12.1214	NaN	11.3323	11.0166	NaN	NaN	11.3177	NaN	11.1686	NaN	11.6807	12.5816	NaN	12.1945	10.6903	9.25677
P19971	TYMP	Thymidine phosphorylase	Undefined	0.0409735	1.3875	0.0560617	0.909079	2.17126			0.00483305	2.31578	0.00407022	1.73602	2.98393	+	+	0.549139	0.260318	0.755753	-0.224515	-0.602056			0.637572	0.195471	0.728369	-0.27041	-0.472794			2.77082	NaN	14.7815	15.3306	15.4098	9.7168	NaN	15.6873	NaN	NaN	10.3611	2.5104	15.2961	2.62863	10.1025	15.3081	15.4487	2.89436
Q92876	KLK6	Kallikrein-6	Undefined	0.0378048	1.42245	0.0515019	0.952866	2.20398			0.000104835	3.97949	5.51724e-05	1.60657	4.42459	+	+	0.256593	0.590755	0.526949	0.706164	1.14578			0.96631	0.0148834	0.980877	-0.0248274	-0.0423946			11.7954	NaN	7.86506	9.88433	11.5299	8.82742	8.96292	10.9159	11.6793	11.0969	6.98494	NaN	11.5174	1.10954	8.93066	8.82273	NaN	NaN
P14384	CPM	Carboxypeptidase M	Undefined	0.896112	0.0476375	0.921056	0.0939598	0.133933			5.93874e-05	4.22631	2.47423e-05	1.28512	4.53132	+	+	0.608603	0.215666	0.794496	0.200119	0.515848			0.032264	1.49128	0.0562508	-0.789343	-2.18884			NaN	11.8382	NaN	13.639	14.0367	13.7035	11.4612	13.1116	NaN	12.6572	12.1309	NaN	13.2844	12.5204	12.2369	12.4048	13.2127	13.4248
Q14258	TRIM25	E3 ubiquitin/ISG15 ligase TRIM25	Undefined	0.287078	0.542	0.354552	0.148477	1.08875			0.00538082	2.26915	0.00458015	1.22212	2.95723	+	+	9.41863e-05	4.02601	0.00412821	0.493879	4.15519		+	0.0340593	1.46776	0.0589455	-0.735486	-2.155			9.28816	10.2812	9.26616	10.0196	8.86788	14.6531	13.3811	8.87468	NaN	10.4241	9.40002	13.4814	14.499	9.1162	NaN	9.8296	10.5329	10.2816
Q9Y4B5	MTCL1	Microtubule cross-linking factor 1	Undefined	0.40442	0.393167	0.480167	-0.583744	-0.859729			0.0437304	1.35922	0.0442719	0.933387	2.14583	+	+	0.00728307	2.13769	0.0785033	-0.929609	-2.80298			0.000628482	3.20171	0.00136925	-1.63801	-3.63521	+	+	8.98777	10.3849	10.0181	NaN	NaN	10.0767	9.46664	NaN	9.3494	9.84187	7.83993	NaN	9.34085	9.63823	NaN	NaN	NaN	NaN
P08575	PTPRC	Receptor-type tyrosine-protein phosphatase C	Undefined	0.0402395	1.39535	0.0551374	1.96823	3.47366			0.0352267	1.45313	0.0349565	0.900082	2.86435	+	+	0.00639189	2.19437	0.0729107	-1.28874	-3.2448			0.758365	0.120122	0.830812	-0.122023	-0.313302			NaN	NaN	NaN	10.4046	11.7368	NaN	NaN	NaN	NaN	11.9701	NaN	NaN	NaN	NaN	NaN	NaN	NaN	NaN
Q13938-4	CAPS	Calcyphosin	Undefined	0.00156787	2.80469	0.00209719	0.466744	3.45611		+	4.00714e-15	14.3972	0	0.8109	10.9587	+	+	0.0711008	1.14813	0.278963	0.317322	1.82619			6.08084e-11	10.216	0	1.29882	7.25902	+	+	13.7103	12.659	12.6927	14.5032	15.3774	14.4587	13.1122	14.1441	14.5436	15.2694	16.0878	14.3447	14.4239	15.7683	11.6928	14.7057	14.2412	15.857
P06703	S100A6	Protein S100-A6	Undefined	1.93282e-05	4.71381	9.95025e-06	0.48037	4.93828		+	6.05416e-19	18.2179	0	0.809871	13.7431	+	+	1.28969e-14	13.8895	0	0.776409	9.09793	+	+	7.86112e-18	17.1045	0	0.880332	10.2511	+	+	17.0966	15.9788	16.0947	16.1646	17.5245	16.6772	15.6591	16.5754	15.8552	17.0717	17.6842	16.169	16.6544	17.131	15.7526	16.3083	15.9282	17.2309
O00299	CLIC1	Chloride intracellular channel protein 1	Undefined	0.304787	0.516004	0.374368	0.238844	1.04865			0.000142314	3.84675	9.27536e-05	0.761069	4.17549	+	+	0.791232	0.101696	0.897132	-0.0725479	-0.265598			0.282408	0.549124	0.376581	0.257131	1.08075			13.6407	13.5947	10.5159	10.8804	14.5232	13.5843	13.8219	11.6745	NaN	11.2987	12.9859	13.8646	15.4511	14.7883	13.7225	13.4622	13.6468	13.766
O00757	FBP2	Fructose-1,6-bisphosphatase isozyme 2	Undefined	0.627623	0.202301	0.697734	-0.169984	-0.507163			0.0370641	1.43105	0.0371562	0.756693	17.1568	+	+	0.348859	0.457349	0.609063	-0.379021	-0.948838			0.0759881	1.11925	0.122593	-0.706741	-1.8205			NaN	NaN	NaN	NaN	NaN	13.0903	NaN	NaN	NaN	NaN	10.4789	NaN	NaN	NaN	NaN	14.5368	NaN	10.7655
O00750	PIK3C2B	Phosphatidylinositol 4-phosphate 3-kinase C2 domain-containing subunit beta	Undefined	0.6541	0.184356	0.720519	0.414107	0.495771			0.00773342	2.11163	0.00683456	0.748436	3.1064	+	+	0.757312	0.120725	0.878477	0.202412	0.314357			0.422709	0.373959	0.526832	0.409942	0.813654			13.0475	12.4855	11.2917	NaN	12.6654	NaN	NaN	NaN	11.6779	NaN	11.5991	NaN	12.1169	12.4167	9.66603	NaN	NaN	12.728
P46940	IQGAP1	Ras GTPase-activating-like protein IQGAP1	Undefined	0.00306418	2.51369	0.00402307	0.369782	3.18875		+	2.93312e-10	9.53267	0	0.717397	7.77103	+	+	0.285045	0.545087	0.554237	0.140833	1.07532			0.000251791	3.59896	0.000632124	0.432269	3.78381		+	14.1666	13.3608	12.7967	14.2992	14.7862	14.4275	13.8707	14.1411	14.1802	14.5944	14.3941	13.7779	14.062	14.2099	13.9558	14.3245	13.4641	14.3596
Q9NYQ8	FAT2	Protocadherin Fat 2	Undefined	0.865027	0.0629702	0.89687	0.0524284	0.17181			0.0402368	1.39538	0.0405566	0.705758	2.124	+	+	0.504222	0.297378	0.725513	-0.172519	-0.670712			0.118102	0.927743	0.180212	-0.407125	-1.57636			13.5219	13.0007	16.4378	13.5503	13.3181	11.2557	11.9467	15.4208	15.1637	14.6262	12.8115	13.181	12.185	11.2485	11.0306	15.0308	14.9623	13.3069
Q16890	TPD52L1	Tumor protein D53	Undefined	0.01048	1.97964	0.0138102	0.568287	2.73065		+	9.97175e-05	4.00123	5.13834e-05	0.700043	4.27918	+	+	0.13049	0.884423	0.378896	0.67556	1.52787			0.464596	0.332924	0.567306	0.275113	0.734233			11.4249	12.1787	11.8489	10.6276	11.8663	11.7826	11.7099	11.8326	12.095	11.9765	11.9399	11.718	10.1435	12.527	13.957	11.9308	11.2702	12.5506
O14773	TPP1	Tripeptidyl-peptidase 1	Undefined	3.44596e-08	7.46269	0	0.574788	7.03474		+	7.42164e-19	18.1295	0	0.696792	13.6749	+	+	8.49899e-05	4.07063	0.00377367	0.389075	4.10476		+	0.00127099	2.89586	0.00279032	0.295505	3.30551		+	13.7323	13.6941	13.3533	13.2774	13.6156	13.9079	13.5299	13.3025	13.6521	14.4495	14.1734	13.5762	13.9883	13.8228	13.4639	13.6632	13.4053	14.1913
P15559	NQO1	NAD(P)H dehydrogenase	Undefined	0.0760431	1.11894	0.101817	0.165752	1.83165			1.31915e-12	11.8797	0	0.69666	9.38106	+	+	0.636668	0.196087	0.812433	0.0885383	0.473937			0.520828	0.283306	0.625451	0.103525	0.644155			12.9285	13.9044	12.9504	14.1405	14.5329	13.8258	12.9446	14.0134	14.3662	13.8582	16.3202	13.0321	12.8971	15.3213	12.9741	12.4315	13.8836	14.3259
P61769	B2M	Beta-2-microglobulin	Undefined	0.000823686	3.08424	0.00117781	0.519314	3.67034		+	2.57325e-10	9.58952	0	0.696027	7.84141	+	+	0.000343304	3.46432	0.0108201	0.612835	3.71625	+	+	3.84476e-05	4.41513	7.10824e-05	0.618898	4.28753	+	+	12.6174	11.8004	12.1488	13.7717	12.76	13.2539	12.495	12.8803	13.124	13.3004	12.8378	12.9445	13.356	13.697	11.6711	13.4664	12.5104	13.1087
Q8WXD2	SCG3	Secretogranin-3	Undefined	5.94833e-05	4.2256	4.158e-05	0.410188	4.56364		+	4.23731e-10	9.37291	0	0.673003	7.67035	+	+	0.016598	1.77994	0.127761	0.291351	2.4387			0.379383	0.420922	0.481491	0.119517	0.882526			12.5013	13.8165	12.984	13.019	13.3825	13.7469	13.302	13.0747	13.4143	13.1011	13.2867	13.3931	13.4936	13.1624	13.2268	12.7918	13.4048	13.0077
Q96JC1	VPS39	Vam6/Vps39-like protein	Undefined	0.000362693	3.44046	0.000614887	0.575022	3.9604		+	6.85149e-06	5.16421	4.94438e-06	0.67139	5.0123	+	+	0.031612	1.50015	0.182305	-0.261771	-2.18153			0.00242821	2.61471	0.00512281	0.284453	3.10261		+	11.6993	12.8054	13.1329	12.5972	12.7576	13.3509	13.2193	12.3263	13.1726	12.7365	13.3573	13.2157	13.6444	13.043	12.6635	12.8548	12.4505	13.5246
P02747	C1QC	Complement C1q subcomponent subunit C	Undefined	4.32562e-06	5.36395	0	0.583708	5.43254		+	2.07819e-11	10.6823	0	0.649892	8.50042	+	+	0.0111131	1.95417	0.101016	0.208889	2.58928			2.43732e-05	4.61309	5.47009e-05	0.360307	4.40283		+	15.9075	15.2758	15.4605	16.2175	15.8495	16.0037	15.1457	15.1791	15.5989	15.5169	15.9024	15.7919	16.0811	15.9843	15.7442	15.4707	15.8428	15.6144
P39060	COL18A1	Collagen alpha-1(XVIII) chain	Undefined	0.00943385	2.02531	0.0123622	0.411963	2.822		+	0.000238359	3.62277	0.00017037	0.642268	4.15297	+	+	0.0588908	1.22995	0.253057	0.360064	1.92445			0.836438	0.0775664	0.889913	0.0408291	0.207212			11.2956	11.3255	12.0221	12.1843	NaN	12.1872	12.0908	12.2906	9.88193	12.5198	12.1482	NaN	12.1345	12.0128	12.773	11.873	12.0115	10.9445
P47929	LGALS7	Galectin-7	Undefined	0.0621261	1.20673	0.0836669	0.929359	1.92889			0.031013	1.50846	0.0305389	0.635655	2.22838	+	+	0.0877102	1.05695	0.309374	-0.623518	-1.72557			0.646546	0.189401	0.73603	0.133533	0.459866			14.2522	13.8683	13.5046	15.6788	15.1229	15.4727	14.0658	16.5634	13.6871	14.2421	12.3549	13.5492	12.3559	15.2058	17.8109	16.2212	16.8634	13.6176
Q96FQ6	S100A16	Protein S100-A16	Undefined	0.0355262	1.44945	0.0486389	0.565424	2.18685		+	4.62353e-08	7.33503	0	0.629245	6.41158	+	+	0.242095	0.616014	0.511483	0.271932	1.17703			0.000269739	3.56906	0.000676056	0.644106	3.76217	+	+	11.8817	12.1135	11.2743	13.7893	13.8306	11.8474	12.1695	13.3762	11.998	13.1307	12.5771	11.7678	11.5761	11.6501	12.5017	12.2927	13.0692	11.9634
Q96AQ6	PBXIP1	Pre-B-cell leukemia transcription factor-interacting protein 1	Undefined	1.8241e-11	10.739	0	0.490933	9.70931		+	3.1333e-26	25.504	0	0.619501	20.154	+	+	4.3895e-05	4.35758	0.00224207	0.251961	4.28217		+	2.08317e-13	12.6813	0	0.500442	8.33534		+	15.0993	15.0059	14.1001	15.1138	15.2391	15.2135	14.6892	14.8412	15.3092	15.4971	15.804	14.7038	14.8321	15.4291	14.7152	15.1857	15.1436	15.6797
Q96BQ5	CCDC127	Coiled-coil domain-containing protein 127	Undefined	0.969735	0.013347	0.978509	0.00818872	0.0382297			0.0473921	1.32429	0.0484526	0.618599	2.04578	+	+	0.0215925	1.6657	0.147697	0.264973	2.33644			0.182161	0.739545	0.262374	-0.251498	-1.34294			15.5841	11.1628	17.3113	9.76188	10.2258	15.0924	11.1811	14.2233	15.0036	15.2412	15.4724	15.3864	14.5702	14.8924	14.4654	15.6823	14.7663	14.8125
P01860	IGHG3	Immunoglobulin heavy constant gamma 3	Undefined	5.02526e-05	4.29884	4.2735e-05	0.557258	4.62013		+	0.000833431	3.07913	0.000601479	0.617542	3.55638	+	+	0.299024	0.524294	0.566747	0.274939	1.04449			0.163607	0.786199	0.238674	-0.346614	-1.40277			12.4491	14.4826	14.7634	13.3925	14.085	13.7243	14.5303	13.2592	13.066	13.6795	12.4256	13.423	12.3243	13.6503	10.4549	12.0539	14.0938	12.4598
P35241	RDX	Radixin	Undefined	1.42205e-07	6.84709	0	0.336419	6.56022		+	1.02271e-14	13.9902	0	0.61524	10.6794	+	+	0.000134799	3.87031	0.00550974	0.177574	3.9781		+	7.59942e-11	10.1192	0	0.314531	7.18711		+	14.6907	14.3889	14.2006	13.9907	14.3716	14.6592	14.1327	13.9366	14.284	14.4607	14.6192	13.4303	14.6167	14.4795	14.0064	14.381	14.0695	14.4808
O75110	ATP9A	Probable phospholipid-transporting ATPase IIA	Ex	8.59432e-10	9.06579	0	0.555963	8.30583		+	2.55432e-12	11.5927	0	0.605692	9.08625	+	+	6.44405e-08	7.19084	9.63855e-06	-0.221346	-5.86202		+	0.0158697	1.79943	0.0292149	-0.0774298	-2.4488		+	14.7226	14.7594	14.186	14.4169	14.3975	14.4165	14.3558	14.4266	14.4014	14.4612	14.4369	14.7495	14.6918	14.5182	14.4846	14.2524	14.5286	14.5933
Q9Y2J8	PADI2	Protein-arginine deiminase type-2	Undefined	5.55582e-07	6.25525	0	0.514736	6.1086		+	4.53963e-20	19.343	0	0.603895	14.6282	+	+	0.0370554	1.43115	0.198674	-0.161931	-2.11459			4.79056e-11	10.3196	0	0.596071	7.27878	+	+	16.7424	16.271	15.1453	16.5431	16.7785	16.0453	15.7167	16.3423	16.4304	17.0531	17.1165	15.5868	16.455	16.9827	15.8338	16.7012	16.6427	17.1231
P08842	STS	Steryl-sulfatase	Undefined	0.10104	0.995506	0.133792	0.436796	1.68555			0.000439022	3.35751	0.000322078	0.601373	3.77045	+	+	0.226509	0.644915	0.494527	0.142931	1.21755			0.000254886	3.59365	0.000636481	0.509074	3.78272		+	12.1848	16.8096	11.5836	13.6469	14.8138	15.3563	15.746	14.2234	15.1708	13.3965	14.0175	14.4358	14.8041	14.766	15.4289	13.9024	13.6802	13.2535
Q96AX1	VPS33A	Vacuolar protein sorting-associated protein 33A	Undefined	0.00122823	2.91072	0.00159684	0.326731	3.51737		+	3.05457e-09	8.51505	0	0.599846	7.13139	+	+	1.92635e-09	8.71527	0	0.448059	6.63422		+	1.97748e-06	5.70389	9.36768e-06	0.374954	5.01593		+	11.7705	13.3101	12.9128	12.7955	12.1046	13.3519	13.2367	12.7871	13.116	12.9933	13.0925	13.1047	13.568	13.2577	12.9174	12.9623	12.5508	13.2904
Q9H223	EHD4	EH domain-containing protein 4	Undefined	6.69355e-07	6.17434	0	0.549542	6.1673		+	2.10666e-06	5.67641	0	0.593056	5.58574	+	+	0.128638	0.890629	0.376234	0.276467	1.53622			0.138927	0.857214	0.206444	0.241862	1.49452			12.111	11.6785	11.3532	12.1111	12.1447	11.6229	11.6226	12.071	11.7365	11.9313	12.2865	12.2259	11.7643	11.8573	11.823	12.3323	12.3703	12.2781
P01011	SERPINA3	Alpha-1-antichymotrypsin	Undefined	4.55532e-05	4.34148	4.37637e-05	0.376827	4.65297		+	6.21376e-15	14.2066	0	0.589814	10.8275	+	+	0.44907	0.347686	0.688516	-0.0595777	-0.76008			0.000813467	3.08966	0.00183459	-0.254369	-3.44087		+	13.6452	13.4091	14.0543	14.2234	14.56	14.7334	13.6292	14.0554	13.6689	14.1805	13.7092	13.9047	13.8872	14.5427	14.2172	14.3543	13.8446	13.552
P20916	MAG	Myelin-associated glycoprotein	Undefined	8.76976e-06	5.05701	1.0989e-05	-0.383769	-5.1996		+	8.93321e-18	17.049	0	-0.592441	-12.8571	+	+	0.0425149	1.37146	0.213355	0.223857	2.05582			0.000555726	3.25514	0.00123963	0.298154	3.55362		+	16.0757	15.6852	15.4752	15.1684	14.6739	15.808	15.1053	15.078	15.547	15.8658	15.411	15.0712	15.6196	15.6489	15.5723	15.8181	15.1561	15.7637
P46778	RPL21	60S ribosomal protein L21	Undefined	3.05419e-05	4.5151	2.7907e-05	-0.538325	-4.85197		+	5.05517e-08	7.29626	0	-0.603243	-6.53183	+	+	0.318313	0.497145	0.584275	-0.11288	-1.0032			0.283028	0.54817	0.377328	0.139228	1.07877			13.4768	12.8759	11.6899	12.0675	11.1965	13.8113	13.5333	13.0905	13.1241	13.2247	12.8324	13.6044	13.6603	13.8877	12.7559	12.9551	13.415	13.7928
Q8IXJ6	SIRT2	NAD-dependent protein deacetylase sirtuin-2	Undefined	4.33053e-09	8.36346	0	-0.417271	-7.74157		+	1.76917e-20	19.7522	0	-0.609015	-14.9585	+	+	0.0110409	1.95699	0.10063	0.216489	2.59168			0.0139136	1.85656	0.0260375	0.172957	2.49842		+	16.5405	16.2581	15.7236	15.9176	15.4574	16.0408	15.7056	15.6706	16.1767	16.5063	15.4329	15.5673	15.9677	15.9174	15.8214	16.2114	15.7992	16.2554
O75363-2	BCAS1	Breast carcinoma-amplified sequence 1	Undefined	0.125412	0.901661	0.165416	-0.398846	-1.57			1.47472e-11	10.8313	0	-0.616405	-8.6396	+	+	0.588803	0.23003	0.781295	0.0719376	0.542415			1.32683e-05	4.87718	3.64299e-05	0.509336	4.55765		+	12.6979	12.4941	12.4343	12.7303	12.7439	13.8735	12.774	12.1415	13.2538	13.3612	12.8202	12.1193	13.474	12.9965	12.6199	13.3655	12.4545	13.3901
P21926	CD9	CD9 antigen	Undefined	4.28807e-05	4.36774	4.43459e-05	-0.550299	-4.69238		+	1.15712e-12	11.9366	0	-0.649675	-9.30991	+	+	0.00276939	2.55762	0.0435372	-0.602377	-3.07168	+	+	0.0176529	1.75319	0.0322333	0.349721	2.40812		+	13.862	15.1149	13.6595	13.9517	13.8622	15.2828	14.0295	13.8969	14.1595	14.9229	13.5419	12.9385	14.5101	13.7752	14.0595	14.7202	13.903	14.6289
P18505	GABRB1	Gamma-aminobutyric acid receptor subunit beta-1	Undefined	2.21847e-06	5.65395	0	-0.536116	-5.65234		+	6.81914e-08	7.16627	0	-0.654162	-6.3468	+	+	1.38473e-05	4.85864	0.000889488	0.529423	4.58202		+	0.0294206	1.53135	0.0518782	0.253256	2.20582			12.2031	12.5337	13.4967	13.6634	12.8381	12.8046	13.2426	14.0462	13.2109	13.0646	12.8753	13.6499	12.9523	12.8418	12.7215	12.4105	13.2947	12.8943
P09543	CNP	2',3'-cyclic-nucleotide 3'-phosphodiesterase	Oli	9.64308e-10	9.01578	0	-0.439619	-8.26522		+	3.56424e-22	21.448	0	-0.65906	-16.3785	+	+	0.0145039	1.83852	0.118732	0.255459	2.48972			0.000214732	3.6681	0.00055409	0.307239	3.82495		+	19.2851	18.9926	18.3237	18.3339	18.1854	18.9158	18.2915	18.299	18.6391	19.2294	18.0825	17.9887	18.9011	18.6213	18.5863	19.2025	18.5481	18.9123
Q6UWR7	ENPP6	Glycerophosphocholine cholinephosphodiesterase ENPP6	Undefined	0.414956	0.381998	0.491176	-0.253572	-0.825607			2.96422e-06	5.52809	0	-0.672697	-5.29178	+	+	0.000363113	3.43996	0.0112933	-1.19749	-3.70144	+	+	5.83449e-06	5.234	2.43408e-05	0.732409	4.76403	+	+	11.5813	10.9337	10.0953	10.6415	9.1126	11.9797	11.516	11.7478	12.0841	13.0271	11.1864	11.8661	11.9438	11.8573	11.5341	12.3739	12.3989	12.6398
Q96PE5	OPALIN	Opalin	Undefined	2.14927e-05	4.66771	9.87654e-06	-0.42455	-4.90307		+	4.06252e-20	19.3912	0	-0.744678	-14.6669	+	+	0.00153316	2.81441	0.0298902	0.509582	3.26185		+	2.28829e-07	6.64049	1.2012e-05	0.657821	5.50982	+	+	16.3001	15.5038	15.2164	14.8934	14.7677	15.1546	14.7944	15.0173	15.3378	15.8879	14.6453	14.2384	15.121	14.9171	15.4636	15.6752	15.0488	15.6834
P60201	PLP1	Myelin proteolipid protein	Oli	4.67856e-10	9.32989	0	-0.580942	-8.52148		+	4.35581e-19	18.3609	0	-0.79903	-13.8538	+	+	0.00379881	2.42035	0.0530706	0.431278	2.96671			0.00289684	2.53807	0.00617462	0.367438	3.04485		+	18.4029	18.7432	16.6789	17.1051	17.0363	17.7385	17.236	17.0766	17.44	18.5433	16.3365	16.8445	17.125	17.3298	17.5254	17.9594	17.0134	17.537
Q16653	MOG	Myelin-oligodendrocyte glycoprotein	Oli	1.6928e-09	8.77139	0	-0.528773	-8.06774		+	1.8823e-17	16.7253	0	-0.800578	-12.6174	+	+	0.0714182	1.14619	0.279238	0.20943	1.82298			0.0128741	1.89028	0.0242071	0.243759	2.52738		+	17.5093	17.5402	16.9968	16.9316	16.4578	17.6529	16.8946	16.8002	17.2496	17.5723	16.299	16.3092	17.0944	16.9533	16.8266	17.2135	16.8279	17.5537
Q9NQW6	ANLN	Anillin	Undefined	0.0308345	1.51096	0.04189	-0.322393	-2.25284		+	1.46617e-12	11.8338	0	-0.813294	-9.2429	+	+	0.0255705	1.59226	0.162361	-0.401012	-2.26876			5.5717e-13	12.254	0	0.998532	8.16553	+	+	12.7059	12.3282	14.0812	13.7853	13.8715	14.1169	12.7277	13.2797	13.5309	14.2145	13.3996	12.4534	13.7358	13.4574	12.5917	14.3941	13.8046	14.1675
Q9Y5B9	SUPT16H	FACT complex subunit SPT16	Undefined	0.602076	0.220349	0.674179	0.0730629	0.529406			0.0113884	1.94354	0.0103625	-0.834362	-2.75061	+	+	0.00443659	2.35295	0.0585372	0.559492	2.95902			0.00034559	3.46144	0.000821782	-1.10482	-3.76869	+	+	14.6274	11.9665	14.4304	11.1164	11.2514	NaN	11.5671	11.1225	12.0515	11.7436	10.7586	12.0319	10.953	11.3332	10.51	11.5748	10.4771	10.7037
P02686-4	MBP	Myelin basic protein	Oli	0.000708169	3.14986	0.001	-0.413469	-3.71383		+	2.26648e-18	17.6446	0	-0.852938	-13.3045	+	+	1.83597e-06	5.73613	0.000213333	-1.00112	-5.08247	+	+	0.00142441	2.84636	0.00317214	0.433507	3.27032		+	17.0342	17.0016	15.5649	15.8166	15.1947	16.598	16.7633	15.5353	16.4729	17.4413	16.5904	16.0027	17.0556	17.1112	16.9334	17.6937	16.2757	17.7108
P02686	MBP	Myelin basic protein	Oli	1.24284e-08	7.90558	0	-0.515574	-7.38017		+	1.39698e-22	21.8548	0	-0.89858	-16.732	+	+	0.072867	1.13747	0.282196	0.319866	1.81358			0.0499316	1.30162	0.084542	0.25873	1.98178			20.5874	20.5227	18.3675	19.0913	18.8838	19.5965	19.3966	18.9536	19.6874	20.8264	18.8218	19.3042	19.4291	20.0658	20.0318	20.3728	19.1207	20.2222
O75508	CLDN11	Claudin-11	Oli	0.137327	0.862243	0.180941	-0.729035	-1.52964			5.84906e-12	11.2329	0	-0.973597	-9.30621	+	+	0.0908966	1.04145	0.315157	-0.595581	-1.71057			0.0213487	1.67063	0.0386558	0.330578	2.33855		+	14.3909	14.2171	11.6845	12.4954	11.9493	12.8337	12.6505	NaN	12.6464	14.2863	11.7055	12.4375	12.8839	13.4772	12.0377	14.119	12.8567	14.1898
Q04609	FOLH1	Glutamate carboxypeptidase 2	Undefined	0.409657	0.38758	0.485165	-0.385483	-0.89941			1.03279e-05	4.98599	4.81928e-06	-1.06037	-5.49825	+	+	0.0812663	1.09009	0.297849	-0.490261	-1.77599			0.0092854	2.0322	0.0180507	0.511718	2.66436		+	11.8719	NaN	NaN	11.0643	NaN	12.2552	11.3263	10.9632	11.3518	11.6769	10.719	NaN	11.9732	11.8807	10.3603	11.4297	10.5927	11.8274
Q8TF21	ANKRD24	Ankyrin repeat domain-containing protein 24	Undefined	0.168569	0.773222	0.218544	-0.365527	-1.44208			0.00746336	2.12707	0.00660741	-1.17305	-3.21208	+	+	0.0134703	1.87062	0.113584	0.626718	2.54386			0.993652	0.00276571	0.996907	0.00247342	0.00798731			13.698	14.8007	11.2033	NaN	NaN	NaN	10.9315	8.89735	NaN	12.5729	12.0463	12.9018	14.367	14.3625	NaN	10.9635	11.9637	NaN
O95394	PGM3	Phosphoacetylglucosamine mutase	Undefined	0.000750333	3.12475	0.00110983	0.216915	3.69336		+	1.09e-08	7.96257	0	0.225841	6.78496		+	1.44322e-09	8.84067	0	0.650222	6.69627	+	+	7.71416e-18	17.1127	0	0.815259	10.2547	+	+	15.0118	14.7815	14.752	14.5515	14.8848	14.9057	14.5588	14.4033	14.7047	14.6517	15.2225	14.482	14.711	14.7637	14.3767	14.4741	14.7386	15.0357
O75936	BBOX1	Gamma-butyrobetaine dioxygenase	Undefined	0.0187957	1.72594	0.0250347	0.142653	2.46403		+	1.0286e-09	8.98775	0	0.294217	7.42808		+	0.000121865	3.91412	0.00513215	0.316715	4.00601		+	8.93571e-17	16.0489	0	0.788367	9.79735	+	+	13.9668	13.4202	13.525	13.5275	13.7527	13.6703	13.2926	13.924	13.4565	14.4219	14.8346	13.2912	13.7837	13.6505	12.5787	13.4122	13.6267	14.1534
P16403	H1-2	Histone H1.2	Undefined	0.0233092	1.63247	0.031749	0.308096	2.37224		+	0.111988	0.95083	0.119759	0.156217	1.61728			0.000181208	3.74182	0.00683383	0.630587	3.89718	+	+	3.06398e-16	15.5137	0	1.29818	9.58102	+	+	17.1927	17.9003	17.8885	17.2343	16.9907	17.6495	17.3242	17.6798	16.9813	17.4126	17.7907	16.3093	18.0781	17.5668	16.2883	17.382	17.2699	18.7748
Q9BQ69	MACROD1	ADP-ribose glycohydrolase MACROD1	Undefined	0.156565	0.805306	0.204499	0.178669	1.44876			0.696161	0.15729	0.716827	0.0191967	0.392679			6.32094e-05	4.19922	0.00289686	-0.541276	-4.18684		+	3.24944e-16	15.4882	0	0.892348	9.55586	+	+	13.5597	14.1967	14.3524	14.0452	14.5579	14.4219	13.6072	14.2228	14.3329	14.3743	14.5116	14.2599	14.5539	14.5353	13.384	14.7285	14.385	14.5328
P68431	H3C1	Histone H3.1	Undefined	0.577782	0.238236	0.654963	0.0458621	0.561875			0.299915	0.523002	0.316435	0.0542977	1.04706			2.54239e-12	11.5948	0	0.769537	8.0228	+	+	1.37203e-15	14.8626	0	0.799934	9.28579	+	+	16.1222	15.6903	16.1358	15.7966	16.1591	15.9673	15.1185	15.7295	15.9023	15.9807	16.2079	15.0822	16.075	15.7604	15.2904	16.4819	15.964	16.3241
O43175	PHGDH	D-3-phosphoglycerate dehydrogenase	Undefined	0.0637428	1.19557	0.085743	0.0533654	1.91463			0.0248044	1.60547	0.023898	0.0734992	2.31144		+	1.47052e-09	8.83253	0	0.35172	6.69225		+	4.58166e-15	14.339	0	0.655759	9.05905	+	+	17.5497	17.0072	16.6586	16.3814	17.0896	17.314	16.5928	16.4466	16.8948	17.4095	17.9492	16.4728	17.1927	17.3287	16.4162	16.3167	16.801	17.5646
Q9Y617	PSAT1	Phosphoserine aminotransferase	Undefined	0.428256	0.368296	0.505825	0.0356952	0.80149			0.000419272	3.3775	0.000304196	0.137794	3.76953		+	0.100213	0.999076	0.331487	0.136103	1.65982			1.41364e-14	13.8497	0	0.710979	8.84648	+	+	16.2927	15.7656	15.8215	15.3379	16.2263	15.9384	15.616	15.3641	15.3051	15.7446	16.5077	14.6756	16.0004	16.1218	14.7427	15.511	15.4539	16.3529
P07305	H1-0	Histone H1.0	Undefined	0.00115339	2.93803	0.00153476	0.21697	3.53999		+	0.233861	0.631043	0.246064	0.0492519	1.20447			7.58095e-12	11.1203	0	0.618116	7.79807	+	+	1.82808e-14	13.738	0	0.667357	8.79786	+	+	17.3987	16.8065	16.9981	16.6872	17.1094	16.9608	16.3342	16.8571	16.8712	17.3812	17.4992	16.2409	17.1219	17.0712	16.8168	17.418	16.9221	17.4179
Q9UKA9	PTBP2	Polypyrimidine tract-binding protein 2	Oli	0.078669	1.1042	0.105318	0.179886	1.8147			0.00120329	2.91963	0.000916733	0.1886	3.43417		+	0.113217	0.946089	0.352536	-0.199047	-1.59882			1.17363e-13	12.9305	0	0.845461	8.4654	+	+	12.1678	11.6922	11.8028	11.5268	11.9087	12.3455	11.9855	12.525	12.4409	12.776	13.1412	12.0976	12.3818	12.6184	12.0301	12.049	12.3721	13.4305
O95881	TXNDC12	Thioredoxin domain-containing protein 12	Undefined	0.316595	0.499496	0.385982	-0.10646	-1.01691			0.00134364	2.87172	0.00101178	-0.182396	-3.38934		+	2.49063e-10	9.60369	0	-0.727614	-7.0701	+	+	1.74912e-13	12.7572	0	0.603697	8.36873	+	+	15.8306	15.1253	14.6792	14.6952	14.6469	15.0367	14.5656	14.9624	14.8518	15.0415	15.0104	15.0537	14.8801	15.0352	14.3309	15.1409	14.815	15.1404
P10412	H1-4	Histone H1.4	Undefined	0.0365316	1.43733	0.0499187	0.111766	2.17428		+	0.647083	0.18904	0.66553	0.01964	0.460492			8.13675e-07	6.08955	0.00012616	0.502972	5.27683		+	1.77251e-12	11.7514	0	0.779542	7.92384	+	+	17.4786	17.246	17.4439	16.9891	17.4402	17.637	16.6185	17.1188	17.3963	17.649	18.1267	16.5197	17.7219	17.1086	16.6466	17.7304	17.2409	17.9293
Q9BUT1	BDH2	Dehydrogenase/reductase SDR family member 6	Undefined	5.32554e-06	5.27364	0	0.302141	5.36405		+	5.20703e-15	14.2834	0	0.419952	10.8803		+	0.0328799	1.48307	0.186405	0.17836	2.16517			1.93795e-12	11.7127	0	0.641451	7.91511	+	+	13.6926	13.5096	13.3704	13.8067	14.241	13.9309	13.3984	13.6639	13.9329	14.1793	14.7265	13.1212	13.6237	14.1021	13.0246	13.7199	14.1382	14.2208
O15061	SYNM	Synemin	Undefined	7.30427e-07	6.13642	0	0.382269	6.0183		+	5.0963e-11	10.2927	0	0.489418	8.25216		+	0.494586	0.305758	0.718791	-0.0552797	-0.685678			4.58046e-12	11.3391	0	0.651526	7.74772	+	+	12.5471	13.0822	12.6516	13.9765	13.5166	13.2767	13.0012	13.4622	13.5127	14.033	14.5835	13.289	13.2326	13.9709	13.6131	13.1498	12.9338	13.7835
Q5SRE7	PHYHD1	Phytanoyl-CoA dioxygenase domain-containing protein 1	Undefined	0.00739249	2.13121	0.00961284	0.194517	2.87333		+	1.58134e-05	4.80098	4.62963e-06	0.265704	4.78005		+	0.426826	0.369749	0.670931	0.102127	0.798758			1.00093e-11	10.9996	0	0.829645	7.71959	+	+	13.1385	12.6372	12.8242	12.5645	13.2992	12.7259	13.2046	12.4444	13.5874	13.1601	14.144	13.0762	13.2563	13.0474	12.7151	12.9417	13.9045	14.12
Q86V88	MDP1	Magnesium-dependent phosphatase 1	Undefined	0.903278	0.0441787	0.926557	-0.0198033	-0.122432			0.355509	0.44915	0.375001	0.0693113	0.932264			0.103415	0.985415	0.336639	-0.21981	-1.64415			2.6862e-11	10.5709	0	0.731329	7.39318	+	+	12.071	13.5666	13.7548	14.1507	13.7384	14.0099	14.136	14.2054	13.1823	13.7781	13.6281	13.9432	14.0925	14.1279	13.5834	13.4482	13.4447	13.5123
P05556	ITGB1	Integrin beta-1	Undefined	0.00544269	2.26419	0.00688865	0.23126	2.96335		+	6.79523e-10	9.1678	0	0.338861	7.54125		+	0.490828	0.309071	0.716302	-0.0606471	-0.691648			3.23514e-11	10.4901	0	0.591461	7.35647	+	+	13.4131	12.9193	12.9836	12.9267	13.0085	13.0893	12.2239	12.5456	13.0112	13.4217	13.8619	12.8291	13.1099	13.5285	12.3133	13.3143	12.7722	13.5885
P55795	HNRNPH2	Heterogeneous nuclear ribonucleoprotein H2	Undefined	0.620599	0.207189	0.691884	0.0361315	0.499433			0.196079	0.707569	0.207394	-0.124261	-1.30963			0.201459	0.695813	0.467121	0.109156	1.28622			3.62441e-11	10.4408	0	0.615744	7.33401	+	+	14.8631	14.3736	14.8925	14.0377	15.4222	14.194	14.2834	14.232	14.0179	14.2645	14.4036	14.5545	14.4826	14.2414	15.0642	15.2715	15.0361	14.5087
Q9Y5Z4	HEBP2	Heme-binding protein 2	Undefined	0.0371484	1.43006	0.0506777	0.234422	2.16672			0.00140725	2.85163	0.00105477	0.220569	3.3738		+	0.00442078	2.3545	0.058491	0.525923	2.921			3.84897e-11	10.4147	0	0.99659	7.37359	+	+	13.6534	13.1494	13.9519	12.7945	13.4761	13.2294	13.257	12.8629	12.9183	13.1994	12.9909	13.606	13.776	13.213	12.3151	13.3037	13.3866	13.5518
P17655	CAPN2	Calpain-2 catalytic subunit	Undefined	0.0170101	1.76929	0.0226954	0.16634	2.50601		+	5.03599e-05	4.29791	2.09424e-05	0.174013	4.42046		+	0.00427515	2.36905	0.0571986	0.215168	2.92682			4.88957e-11	10.3107	0	0.590031	7.27472	+	+	14.0324	13.5815	13.3656	13.9045	14.1354	13.7994	13.2713	13.7407	13.563	14.2998	14.4008	13.5513	13.9455	14.3121	13.258	13.6418	13.4478	13.9185
P36405	ARL3	ADP-ribosylation factor-like protein 3	Undefined	0.00263637	2.57899	0.00353444	-0.252975	-3.23794		+	0.231678	0.635115	0.244037	-0.106224	-1.21019			2.17209e-05	4.66312	0.00124775	-0.516259	-4.4664		+	1.15014e-10	9.93925	0	0.62495	7.10445	+	+	13.9674	14.0011	13.798	13.6863	13.6868	13.9781	13.8154	13.5333	13.7044	13.6597	14.1359	13.1816	13.7597	13.8755	13.5653	13.7755	13.5259	13.7114
Q13418	ILK	Integrin-linked protein kinase	Undefined	0.714731	0.145857	0.772988	0.0830128	0.368573			0.0581612	1.23537	0.0599632	0.221857	1.93806			0.0217984	1.66158	0.148349	-0.518352	-2.33268			1.21045e-10	9.91705	0	1.28469	7.11366	+	+	12.6053	13.5956	11.8397	11.6348	12.8512	11.9123	11.6066	12.755	11.8119	12.4604	12.9365	12.4383	11.8513	13.4365	12.3208	11.9833	12.0479	13.5221
P0C0S5	H2AZ1	Histone H2A.Z	Undefined	0.0958053	1.01861	0.127434	-0.49079	-1.71168			0.0369291	1.43263	0.0368397	-0.33467	-2.14162		+	0.00996206	2.00165	0.0946222	-0.51979	-2.6294			2.31334e-10	9.63576	0	0.886728	6.96429	+	+	13.7068	13.0659	14.6869	13.9958	13.5757	13.2248	13.0658	13.6446	13.1895	14.8818	14.5564	13.3686	12.4934	14.456	13.1145	13.8812	12.192	15.1064
P51151	RAB9A	Ras-related protein Rab-9A	Undefined	0.0608453	1.21577	0.0821221	0.164	1.93704			0.238118	0.623207	0.250277	0.101312	1.19343			8.56697e-05	4.06717	0.00381779	-0.381161	-4.10259		+	6.42579e-10	9.19207	0	0.648483	6.7575	+	+	14.2044	15.0125	14.1224	13.8985	13.7251	14.7423	14.4885	14.3305	14.1552	14.4766	13.9063	13.7652	14.8435	14.4717	14.3977	14.1308	13.6564	14.3701
O00273	DFFA	DNA fragmentation factor subunit alpha	Undefined	0.268149	0.571623	0.334248	-0.2085	-1.12827			0.417388	0.37946	0.436158	0.102585	0.818021			0.00399684	2.39828	0.0548942	0.617972	2.96104			7.96831e-10	9.09863	0	1.22695	6.78011	+	+	11.4471	11.7637	11.8201	13.4968	13.0514	11.4785	11.2118	10.5055	12.5333	12.2665	12.8287	12.6157	12.6457	12.9908	12.2915	11.6701	10.6927	12.8593
P07108	DBI	Acyl-CoA-binding protein	Undefined	0.0205216	1.68779	0.0278802	0.278674	2.42677		+	4.025e-13	12.3952	0	0.302269	9.61049		+	0.711538	0.147802	0.854061	0.0556814	0.370888			9.21594e-10	9.03546	0	0.795237	6.68393	+	+	16.0391	16.2576	15.8885	14.8598	16.2032	16.4044	15.7365	15.4728	15.6628	15.6358	16.4063	14.505	16.2	16.4726	15.1672	16.1489	15.7575	16.6006
Q9UDY2	TJP2	Tight junction protein ZO-2	Undefined	0.000367342	3.43493	0.000626817	0.406655	3.94367		+	8.69394e-10	9.06078	0	0.381776	7.47397		+	0.171295	0.766254	0.430736	0.139114	1.37836			1.0906e-09	8.96234	0	0.650898	6.64948	+	+	13.0899	12.4623	12.2894	13.051	12.5693	13.2014	12.235	12.4161	13.0091	13.367	13.9949	12.2667	13.0911	13.2746	11.9818	13.4124	12.0701	13.6005
Q9Y5L3	ENTPD2	Ectonucleoside triphosphate diphosphohydrolase 2	Undefined	0.189258	0.722946	0.243225	0.181898	1.34435			0.00868973	2.06099	0.00774502	0.206181	2.73856		+	0.0117071	1.93155	0.104027	-0.425579	-2.57396			2.59032e-09	8.58665	0	0.807387	6.51362	+	+	13.3923	12.7052	12.125	12.3415	12.1986	12.9784	12.5868	12.1207	12.8286	12.8536	13.6495	12.3072	12.6959	13.5132	NaN	11.8281	12.9812	12.8542
O15230	LAMA5	Laminin subunit alpha-5	Undefined	0.448555	0.348185	0.526502	-0.0744594	-0.766438			0.0242676	1.61497	0.0233199	-0.134154	-2.32056		+	0.00834055	2.07881	0.085072	0.326049	2.69372			1.22915e-08	7.91039	0	0.632538	6.14519	+	+	12.6808	12.338	12.3266	12.3609	12.8792	12.0737	12.0811	12.527	12.7305	13.612	13.3411	12.7374	12.2961	12.8174	11.9303	12.5626	12.6843	13.3048
Q13501	SQSTM1	Sequestosome-1	Undefined	0.0575431	1.24001	0.0776563	0.284366	1.96779			0.474627	0.323648	0.494575	0.0654889	0.7202			0.00332332	2.47843	0.0489111	-0.481688	-3.01657		+	1.4357e-08	7.84294	0	0.808827	6.13417	+	+	13.5085	13.9029	14.9074	14.5856	14.0656	14.525	14.1159	14.6808	14.3429	14.7349	14.7292	15.1539	14.1184	15.1864	13.5616	14.5671	14.9608	14.7761
Q6BCY4	CYB5R2	NADH-cytochrome b5 reductase 2	Undefined	0.088237	1.05435	0.1177	-0.329778	-1.79224			7.92133e-07	6.1012	0	-0.46687	-5.65503		+	8.16859e-06	5.08785	0.00057468	-1.00724	-4.77361	+	+	1.51071e-08	7.82082	0	0.988652	6.12786	+	+	12.1655	11.4937	11.8401	11.7597	11.5642	12.4506	10.2181	11.2579	11.1432	11.8932	11.5947	10.1618	12.5876	11.3748	10.902	12.1589	11.8271	12.2738
P46939	UTRN	Utrophin	Undefined	0.0216157	1.66523	0.0293158	0.225539	2.41143		+	0.137074	0.863046	0.146566	0.120204	1.51009			0.808203	0.0924797	0.90682	-0.0317049	-0.243423			2.17793e-08	7.66196	0	0.713039	6.02345	+	+	12.8776	13.1266	12.4405	13.4548	13.2896	13.2485	12.9068	12.5621	12.8661	13.5396	13.4622	13.4456	13.1512	13.3031	12.8182	13.3076	12.3563	12.6844
P01303	NPY	Pro-neuropeptide Y	In	0.0036223	2.44102	0.00475932	0.461691	3.11887		+	3.64571e-10	9.43822	0	0.520118	7.74496		+	0.0523833	1.28081	0.238156	0.301215	1.96459			2.34331e-08	7.63017	0	0.806357	6.01182	+	+	14.3818	14.716	15.1151	15.3735	14.8534	14.7967	15.1485	14.5537	14.7177	15.2437	14.8476	15.137	15.3532	14.8666	14.6675	15.1681	14.9425	14.964
Q9Y303-2	AMDHD2	N-acetylglucosamine-6-phosphate deacetylase	Undefined	0.000204846	3.68857	0.00043964	0.473923	4.17389		+	5.67007e-06	5.24641	4.99376e-06	0.427364	5.07824		+	0.103883	0.983456	0.337013	-0.264185	-1.64241			2.74691e-08	7.56116	0	0.701915	5.98172	+	+	11.8793	11.2756	11.9032	12.8802	12.7432	12.5104	12.2758	12.5531	11.963	13.4064	12.7933	12.2008	12.446	12.6857	12.5492	12.2264	12.5833	12.9286
P04271	S100B	Protein S100-B	Undefined	0.506924	0.295058	0.585331	0.0472609	0.670526			0.000120835	3.91781	7.82014e-05	0.259792	4.15684		+	1.39232e-09	8.85626	0	-0.718158	-6.70398	+	+	3.42652e-08	7.46515	0	0.599184	5.92619	+	+	14.4113	13.9191	13.4059	14.4968	14.6559	14.3281	13.9451	14.0072	14.1988	14.5066	14.9824	14.0461	14.1844	14.5124	13.361	14.5843	14.8988	14.8662
Q9P0V9	SEPTIN10	Septin-10	Undefined	0.162074	0.790286	0.210677	-0.394023	-1.42919			0.000405023	3.39252	0.00030149	0.47376	3.78053		+	0.365087	0.437604	0.622342	0.16257	0.910266			6.30887e-08	7.20005	0	1.00051	5.81286	+	+	14.215	13.0371	12.3428	14.8522	15.4822	15.8102	15.5473	15.2539	14.5935	14.6939	15.2274	14.0529	15.4198	15.5614	15.7587	15.1635	14.7059	15.4918
Q15417	CNN3	Calponin-3	Undefined	0.0299417	1.52372	0.0406168	0.157314	2.26305		+	2.3865e-05	4.62224	4.45931e-06	0.199259	4.6408		+	0.0019806	2.7032	0.0351244	0.457708	3.18043		+	6.44781e-08	7.19059	0	0.695019	5.78922	+	+	15.3374	14.934	14.5353	14.9442	13.9115	15.11	14.74	14.3706	14.7595	14.8716	15.7344	14.6059	14.6476	15.6454	14.7899	14.5873	14.3424	14.2279
P16930	FAH	Fumarylacetoacetase	Undefined	0.0788349	1.10328	0.105495	0.141722	1.81034			5.49541e-09	8.26	0	0.320908	6.97146		+	1.23347e-05	4.90887	0.000819672	0.603947	4.6141	+	+	6.83467e-08	7.16528	0	0.739321	5.78013	+	+	13.7371	13.2369	13.7086	13.7716	13.8732	12.9349	13.3038	13.7337	13.4148	13.8374	14.0114	12.9858	13.5467	13.3263	12.066	13.176	13.4216	13.8916
Q8TAM6	ERMN	Ermin	Undefined	0.00017733	3.75122	0.000400729	-0.267145	-4.19427		+	1.70716e-10	9.76773	0	-0.405808	-7.91942		+	0.00218677	2.6602	0.0375744	0.475133	3.14857		+	8.48157e-08	7.07152	0	0.682822	5.72933	+	+	16.6523	15.6505	15.3483	15.2299	14.5579	15.6829	14.8563	14.8733	15.3738	15.7462	15.4209	14.5084	15.4995	15.3185	15.1361	16.0291	15.0907	15.5708
P61457	PCBD1	Pterin-4-alpha-carbinolamine dehydratase	Undefined	0.651154	0.186316	0.718309	0.043927	0.456074			0.0274138	1.56203	0.0265791	0.165653	2.26949		+	0.471227	0.32677	0.704815	-0.0879468	-0.723345			9.24821e-08	7.03394	0	0.675667	5.71036	+	+	15.5605	15.3003	15.5675	15.0736	15.0804	15.5896	15.2853	14.4408	15.1097	15.2099	15.7846	15.6535	15.6659	15.4989	14.7328	15.3437	15.3006	15.6506
P48506	GCLC	Glutamate--cysteine ligase catalytic subunit	Undefined	0.332891	0.477698	0.403036	0.207354	0.981894			0.0307733	1.51183	0.030299	0.25313	2.22041		+	2.01517e-06	5.69569	0.000229885	-1.09458	-5.05999	+	+	1.38577e-07	6.85831	1.26582e-05	0.717347	5.62129	+	+	14.5482	14.57	14.9655	14.6763	14.0043	14.7581	15.061	13.679	14.3932	14.0912	14.9474	13.9989	15.1148	14.7092	14.1909	13.4937	14.1786	15.0754
Q8N3E9	PLCD3	1-phosphatidylinositol 4,5-bisphosphate phosphodiesterase delta-3	Undefined	0.926011	0.0333837	0.944373	-0.0191583	-0.0935765			5.24839e-08	7.27997	0	0.38386	6.39796		+	0.989481	0.00459275	0.996344	0.00140301	0.0132213			3.74398e-07	6.42667	1.1236e-05	0.609141	5.42482	+	+	14.7999	14.9402	13.9647	14.137	13.9799	15.4343	14.6825	14.4836	15.3356	15.994	15.6407	14.6402	15.2627	15.1774	14.4118	14.7204	15.0185	15.237
Q13045	FLII	Protein flightless-1 homolog	Undefined	0.299091	0.524197	0.36808	0.205735	1.05608			0.0123895	1.90695	0.0112674	0.230398	2.59476		+	0.0225123	1.64758	0.150496	-0.355411	-2.32072			4.52985e-07	6.34392	1.07239e-05	0.63343	5.35904	+	+	13.9904	14.101	12.7591	13.0464	12.9712	13.3707	13.4847	12.8264	12.7745	12.7466	13.6982	12.8571	13.5478	13.6464	12.9172	13.7293	13.1982	13.3393
Q8NHG7	SVIP	Small VCP/p97-interacting protein	Undefined	0.00211149	2.67541	0.00282411	-0.435755	-3.3201		+	0.0378585	1.42184	0.0380273	-0.127546	-2.13075		+	0.00114063	2.94286	0.0245417	0.345614	3.35422		+	5.94429e-07	6.2259	1.04439e-05	0.589153	5.2943	+	+	14.7163	17.1241	16.4458	16.397	16.1217	16.3527	16.4631	15.6134	16.3016	16.3439	16.8443	16.5729	16.1456	16.4263	16.3498	16.5099	16.6273	16.3432
P24821	TNC	Tenascin	Undefined	0.526194	0.278854	0.604134	0.0892866	0.64062			6.62036e-05	4.17912	3.27533e-05	0.243922	4.33874		+	0.339732	0.468864	0.6024	0.119075	0.959792			1.23442e-06	5.90854	9.80392e-06	0.636536	5.13949	+	+	12.5357	12.8378	12.4653	14.1451	13.2953	13.939	13.1077	13.3899	13.3976	15.465	14.3683	13.322	13.4719	14.6415	13.0012	13.4556	12.9052	14.627
Q96IU4	ABHD14B	Putative protein-lysine deacylase ABHD14B	Undefined	0.193533	0.713246	0.248376	0.30541	1.33003			0.000223076	3.65155	0.000160298	0.292907	3.97987		+	0.0627602	1.20232	0.260845	-0.317073	-1.88593			1.32151e-06	5.87893	9.7561e-06	0.624043	5.13215	+	+	12.5691	12.1667	12.7502	12.4218	12.7798	14.5992	13.0009	13.241	13.8328	13.9566	14.6105	13.6937	14.7468	14.365	NaN	13.6961	13.7627	14.2722
P62841	RPS15	40S ribosomal protein S15	Undefined	0.675292	0.170508	0.738294	0.0566124	0.422768			0.011197	1.9509	0.010175	-0.402384	-2.63417		+	0.00260266	2.58458	0.0418488	0.756153	3.0947	+	+	1.38215e-06	5.85945	9.66184e-06	1.06652	5.10491	+	+	13.3061	12.8306	13.8798	14.8139	14.0483	14.3532	14.1069	14.2669	14.5656	14.4539	13.9557	14.5407	14.2463	14.5679	14.3385	14.377	14.5009	14.6788
P84095	RHOG	Rho-related GTP-binding protein RhoG	Undefined	0.628728	0.201537	0.698485	-0.114634	-0.487808			0.852187	0.069465	0.870509	0.0144347	0.187258			0.153539	0.813782	0.408145	0.352606	1.43852			2.43286e-06	5.61388	9.07029e-06	0.750899	4.96706	+	+	14.0365	13.2737	12.7478	13.092	12.8882	13.7779	13.1671	12.8051	13.3749	13.7206	13.4821	13.0982	13.6766	13.6728	12.3552	13.8335	13.1355	13.9837
P02452	COL1A1	Collagen alpha-1(I) chain	Undefined	0.304798	0.515988	0.37421	0.208231	1.04147			0.120363	0.919506	0.12859	-0.193165	-1.57916			0.000748635	3.12573	0.0184268	0.685741	3.48411	+	+	3.61341e-06	5.44208	8.69565e-06	0.845073	4.87523	+	+	13.8558	14.4517	14.2964	15.7069	14.9281	15.1719	13.7999	14.7494	16.3822	16.0988	15.7034	13.3802	15.4338	14.9304	14.502	14.8074	14.2739	16.3399
P49789	FHIT	Bis(5'-adenosyl)-triphosphatase	Undefined	0.364965	0.437748	0.438198	-0.528333	-0.91861			0.783254	0.106098	0.803554	-0.0530638	-0.276509			2.37266e-11	10.6248	0	-3.24934	-7.56203	+	+	7.92279e-06	5.10112	2.32558e-05	1.46837	4.68307	+	+	10.1635	13.9063	13.9109	13.3309	12.6473	14.2517	13.5522	11.8355	13.8609	12.6287	13.9791	14.292	14.4969	13.7474	13.1168	11.5892	12.0506	13.2621
P16401	H1-5	Histone H1.5	Undefined	0.0697421	1.15651	0.0934666	0.228621	1.87088			0.000359522	3.44427	0.000273535	0.398756	3.82354		+	0.000467271	3.33043	0.0133652	0.707287	3.63347	+	+	9.912e-06	5.00384	3.02457e-05	0.866747	4.64466	+	+	15.0283	15.2847	15.4963	16.8204	16.8293	16.901	15.7189	16.6629	16.7364	16.5554	17.4615	16.2685	17.3241	16.0939	16.0788	16.9373	17.0184	17.689
Q8N128	FAM177A1	Protein FAM177A1	Undefined	0.00567682	2.24589	0.0071139	0.501559	2.95873		+	0.00209668	2.67847	0.0016492	0.353958	3.23832		+	0.345279	0.46183	0.606395	-0.132226	-0.948456			1.02059e-05	4.99115	3.00752e-05	0.615688	4.62083	+	+	12.7297	12.708	15.0589	15.5179	15.7592	14.2189	14.4051	15.9192	14.7763	16.0018	15.189	14.2716	13.9113	14.3944	15.0932	14.8592	14.3377	14.7053
P04004	VTN	Vitronectin	Undefined	0.0981592	1.00807	0.130359	0.261688	1.69918			0.650744	0.18659	0.669196	0.0314244	0.455363			0.00203835	2.69072	0.0357997	0.580074	3.17121		+	1.09121e-05	4.96209	2.97952e-05	0.587443	4.6043	+	+	14.7684	14.1854	15.4924	15.1319	14.066	14.0182	14.705	14.2751	14.5458	14.6503	13.7627	14.1301	13.8944	14.2696	14.482	14.5513	14.2362	14.6676
Q2TAA2	IAH1	Isoamyl acetate-hydrolyzing esterase 1 homolog	Undefined	0.310958	0.507298	0.379958	0.294585	1.02809			0.420662	0.376067	0.439108	0.127819	0.811704			0.238517	0.622481	0.508073	-0.295904	-1.18608			1.47356e-05	4.83163	3.59066e-05	1.0259	4.52963	+	+	17.5644	17.3682	18.1956	19.2139	17.5031	17.3213	16.8615	18.183	16.432	17.9507	15.5358	15.0672	15.3941	15.1466	15.8086	16.7918	17.5109	15.3064
Q96DE0	NUDT16	U8 snoRNA-decapping enzyme	Undefined	0.853984	0.0685505	0.888835	0.0657207	0.185443			0.0846514	1.07237	0.0898051	0.147268	1.75789			0.000312836	3.50468	0.0100351	-1.01214	-3.74165	+	+	4.91376e-05	4.30859	0.00010675	0.715166	4.22222	+	+	12.875	12.907	13.3224	14.2159	13.1545	13.2107	13.2205	12.7719	12.6784	12.8707	13.6067	13.9712	13.4993	12.7639	11.6557	11.7587	12.7526	12.6455
P24043	LAMA2	Laminin subunit alpha-2	Undefined	0.0646352	1.18953	0.0869835	-0.212111	-1.9079			0.000216184	3.66518	0.000157009	-0.482107	-3.97781		+	0.0384309	1.41532	0.202836	0.494238	2.09942			9.8055e-05	4.00853	0.000280702	0.808074	4.04062	+	+	11.7934	10.9796	10.9771	11.3145	11.0389	10.9301	10.9101	11.4384	11.5202	12.034	11.6457	11.6165	11.3926	11.6915	10.8244	11.4888	10.8747	11.4766
Q01469	FABP5	Fatty acid-binding protein 5	Undefined	0.246224	0.608669	0.310959	0.275816	1.17932			0.37087	0.430778	0.389609	0.149829	0.902657			0.248813	0.604127	0.518708	0.178156	1.16028			0.000141519	3.84918	0.000356546	0.631315	3.93992	+	+	14.4355	14.2692	13.8897	15.6796	16.8434	14.4479	14.6624	15.879	13.8333	15.1198	14.5315	13.9734	14.0261	15.7176	17.234	16.0556	16.0391	14.304
P36959	GMPR	GMP reductase 1	Undefined	0.958633	0.0183476	0.970096	-0.0186186	-0.0522528			0.732399	0.135252	0.752572	0.0593812	0.343779			9.33558e-05	4.02986	0.0040984	-1.16033	-4.08105	+	+	0.000211691	3.6743	0.000555556	0.865146	3.83006	+	+	14.3409	15.1858	13.1498	14.3288	13.9183	14.4312	13.8062	14.102	14.5017	14.1564	15.3513	13.5562	14.718	15.1201	13.7343	13.6407	14.5302	15.2639
P20810	CAST	Calpastatin	Undefined	0.693577	0.158905	0.754294	-0.0849223	-0.397699			0.0350063	1.45585	0.0347331	-0.439073	-2.16723		+	0.900291	0.045617	0.951735	-0.0293493	-0.125636			0.000394654	3.40378	0.000942029	0.819725	3.65697	+	+	15.3605	15.7719	15.0059	15.8737	13.7626	14.6455	15.047	13.537	13.526	16.135	13.797	13.9505	13.61	14.0061	14.0314	13.6861	14.8489	16.049
P01031	C5	Complement C5	Undefined	0.000295726	3.52911	0.000526667	0.356482	4.01873		+	0.000433522	3.36299	0.000309028	0.25785	3.76908		+	0.00135178	2.86909	0.0274205	0.886774	3.30459	+	+	0.000413842	3.38317	0.000955582	0.882176	3.64434	+	+	13.005	14.7535	14.0977	12.8162	13.6696	12.2207	15.6555	12.6201	14.9554	15.6348	12.7903	13.0194	15.807	13.1461	13.0685	12.9917	12.888	12.4686
Q9UBL0	ARPP21	cAMP-regulated phosphoprotein 21	Undefined	0.374682	0.426337	0.449288	-0.203265	-0.90532			0.137437	0.861896	0.146921	-0.27229	-1.53267			0.0388109	1.41105	0.203381	0.322358	2.10311			0.000451547	3.3453	0.00101767	0.898343	3.66349	+	+	13.4111	14.1623	14.0394	NaN	14.2001	13.5027	14.3367	14.151	NaN	13.5767	NaN	13.6587	13.593	NaN	13.3766	NaN	14.0655	12.6174
O60437	PPL	Periplakin	Undefined	0.723681	0.140453	0.78143	0.104918	0.35677			0.172855	0.762319	0.18383	0.254974	1.38509			0.729738	0.136833	0.862837	0.0890377	0.346563			0.000611192	3.21382	0.00134086	0.797266	3.53452	+	+	14.2645	13.4024	14.7801	14.3296	13.8953	12.7436	13.0091	13.766	14.5978	13.4123	13.5963	13.3052	12.4643	13.3861	14.4829	13.7412	13.6245	12.3584
P13640-2	MT1G	Metallothionein-1G	Undefined	0.912635	0.0397029	0.933865	0.0487476	0.110512			0.633384	0.198333	0.652378	-0.134009	-0.479797			0.161712	0.791258	0.419113	-0.503565	-1.4102			0.000666118	3.17645	0.00148775	1.09437	3.50032	+	+	14.5045	14.9048	17.076	17.3827	16.3574	15.5012	14.7756	16.5895	14.622	15.4873	13.4426	15.3173	12.604	14.9979	15.2986	15.4803	17.5917	12.9666
Q13336	SLC14A1	Urea transporter 1	Undefined	0.712156	0.147425	0.770902	0.0393502	0.372157			0.138574	0.858318	0.148098	0.13291	1.50566			0.109708	0.959763	0.346803	0.28204	1.61584			0.000679325	3.16792	0.00152993	0.627727	3.50208	+	+	13.5854	13.8376	12.4189	13.0947	12.4754	14.3562	13.0613	12.7817	13.7268	14.3074	13.8794	13.1664	12.453	14.2782	13.1865	12.7322	11.9304	13.4336
P23229	ITGA6	Integrin alpha-6	Undefined	0.047013	1.32778	0.063898	0.778339	2.06858			0.255941	0.591861	0.269966	-0.30177	-1.14976			0.550646	0.259128	0.756333	-0.243733	-0.599269			0.000783113	3.10618	0.00175271	1.24225	3.46585	+	+	13.889	13.4652	13.657	13.9512	9.09036	13.5288	13.0542	13.3958	13.3988	14.8032	12.975	13.852	13.5431	11.8763	15.8896	11.9915	13.8762	13.3427
O60664	PLIN3	Perilipin-3	Undefined	0.0212167	1.67332	0.0287723	0.273462	2.42323		+	0.0119083	1.92415	0.0108049	0.259205	2.60829		+	0.0533411	1.27294	0.240305	0.440218	1.95878			0.000937784	3.0279	0.00213474	0.614685	3.40421	+	+	12.0817	11.5219	12.6999	10.2698	12.2594	12.4499	12.4821	12.1288	12.6605	12.6451	12.4516	11.6329	12.1024	11.9931	11.2962	12.2978	11.6488	12.6973
P06454	PTMA	Prothymosin alpha	Undefined	0.103031	0.987031	0.136244	0.858407	1.67407			0.00781247	2.10721	0.00692637	0.254106	2.76721		+	0.411286	0.385856	0.659945	-0.367645	-0.825232			0.00178243	2.74899	0.00386167	0.956564	3.20031	+	+	16.5681	15.6714	17.069	13.9716	15.5972	15.4034	15.4969	14.7939	14.6493	14.8903	15.6945	14.0738	15.6837	14.8346	13.5513	15.0939	14.7663	15.3302
P05204	HMGN2	Non-histone chromosomal protein HMG-17	Undefined	0.000614741	3.21131	0.000874251	0.461479	3.76374		+	0.0011936	2.92314	0.000907937	0.247597	3.42894		+	0.16895	0.772242	0.427725	0.419223	1.38603			0.00359362	2.44447	0.00757193	0.720536	2.97405	+	+	13.3128	12.7303	12.5139	11.944	13.1404	13.0748	11.5239	12.7808	12.6268	13.374	12.9443	11.6336	12.8599	11.7098	11.5407	12.6861	12.1388	12.3519
P30566	ADSL	Adenylosuccinate lyase	Undefined	0.52338	0.281183	0.601437	-0.119542	-0.644807			0.371099	0.43051	0.38958	0.194189	0.902222			0.903473	0.0440847	0.952858	-0.0267681	-0.121617			0.00394878	2.40354	0.00819775	0.724024	2.94558	+	+	12.6987	11.87	12.0617	14.7288	15.4435	13.8902	13.5269	16.3914	13.6044	13.0555	14.416	13.5171	13.6767	16.272	20.3799	14.2293	14.6225	13.2263
P04083	ANXA1	Annexin A1	Undefined	0.081733	1.0876	0.109148	0.525144	1.7923			0.00733553	2.13457	0.00649831	0.375169	2.79077		+	0.221019	0.65557	0.489388	-0.294179	-1.23184			0.00458532	2.33863	0.00938318	0.644021	2.89255	+	+	14.4212	13.972	13.9126	15.103	15.9277	15.0216	13.78	14.9645	13.5695	15.1458	15.9149	14.0907	14.4531	15.389	16.3123	14.9342	14.9473	15.3723
P68036	UBE2L3	Ubiquitin-conjugating enzyme E2 L3	Undefined	0.626276	0.203234	0.696902	-0.122125	-0.49187			0.144163	0.841147	0.153815	-0.353029	-1.48371			0.480334	0.318457	0.70945	-0.243673	-0.708681			0.00648044	2.1884	0.0128968	0.640449	2.77591	+	+	11.9587	13.6792	11.3118	13.1462	11.6376	13.6807	13.555	13.5148	12.5238	13.1776	13.1579	12.6725	13.5119	13.3085	14.7652	12.0197	11.9814	12.326
O00303	EIF3F	Eukaryotic translation initiation factor 3 subunit F	Undefined	0.608829	0.215504	0.680687	-0.109678	-0.51639			0.841201	0.0751001	0.859923	-0.0662927	-0.201362			0.313981	0.503096	0.580747	-0.346675	-1.01221			0.00754569	2.1223	0.0149333	0.932611	2.72068	+	+	14.1755	11.7722	13.8657	11.5158	13.678	13.7221	11.2593	15.2688	13.5638	13.645	14.0367	13.4921	13.841	13.638	11.3724	14.8661	15.1732	11.5535
P61221	ABCE1	ATP-binding cassette sub-family E member 1	Undefined	0.722154	0.14137	0.780565	-0.0902919	-0.358633			0.206944	0.684147	0.218727	-0.31358	-1.27966			0.937268	0.0281362	0.970821	0.0238428	0.0789171			0.00824096	2.08402	0.0161216	0.701604	2.6917	+	+	14.235	10.2409	14.0099	11.1031	14.0675	13.1686	12.9506	14.0756	13.4326	14.124	12.4498	12.9628	12.961	13.6082	13.5637	12.8885	11.5702	13.0974
P11171	EPB41	Protein 4.1	Undefined	0.108048	0.966383	0.142694	0.431012	1.65648			0.9475	0.0234207	0.954996	-0.022271	-0.0662507			0.0934642	1.02935	0.319895	0.450264	1.69991			0.0125626	1.90092	0.0237799	0.867872	2.55075	+	+	12.8702	13.6751	9.92264	11.7599	11.5071	12.5734	12.579	NaN	11.5073	12.4457	12.2684	11.7801	12.5247	13.0535	16.2344	12.0007	12.5808	12.4252
P02730	SLC4A1	Band 3 anion transport protein	Undefined	0.905623	0.0430525	0.928266	-0.0246353	-0.119535			0.00451903	2.34495	0.00380723	-0.559983	-2.99291		+	0.284698	0.545615	0.554026	-0.223292	-1.07638			0.0254887	1.59365	0.0451534	0.613549	2.26622	+	+	14.8431	11.1022	2.97231	14.8149	NaN	12.6935	10.1513	16.3816	12.1612	13.5816	14.1321	11.8159	14.5885	14.5524	13.0451	13.9189	13.8905	12.6065
Q9UGL9	CRCT1	Cysteine-rich C-terminal protein 1	Undefined	0.685573	0.163946	0.74663	0.357527	0.446384			0.713264	0.14675	0.734803	0.501801	0.379294			0.000379362	3.42095	0.0115913	5.41054	4.00237	+	+	0.0265279	1.5763	0.0468485	2.99122	2.30136	+	+	NaN	4.13391	13.5581	11.7445	11.6909	6.87171	1.31469	10.0564	NaN	0.931581	NaN	10.0734	NaN	9.70729	14.3767	11.9522	13.207	NaN
Q8IV01	SYT12	Synaptotagmin-12	Undefined	0.153731	0.813239	0.200932	-0.0653653	-1.45809			0.769821	0.11361	0.790431	-0.00930192	-0.294141			1.25616e-15	14.901	0	-0.567301	-9.56875		+	3.14962e-22	21.5017	0	-0.948111	-12.1461	+	+	14.574	15.1425	14.6204	14.5085	14.4427	14.2354	15.2204	14.6905	15.1524	14.0189	14.166	15.0784	14.5587	14.7632	15.7194	14.9015	14.8037	14.1475
Q9Y2J0	RPH3A	Rabphilin-3A	Neuron	0.00093653	3.02848	0.00130929	-0.174073	-3.61457		+	5.62816e-07	6.24963	0	-0.213365	-5.70389		+	0.130409	0.884692	0.378908	0.104733	1.52555			1.26086e-20	19.8993	0	-0.959982	-11.4529	+	+	15.746	16.3517	15.6303	15.8443	15.0823	15.8785	16.7429	16.0002	16.6146	14.9061	15.0622	16.7881	15.6596	15.8095	16.9689	15.76	15.8142	14.9967
O15240	VGF	Neurosecretory protein VGF	Undefined	1.78035e-08	7.74949	0	0.406036	7.25799		+	4.47398e-17	16.3493	0	0.579735	12.342		+	0.688683	0.161981	0.842732	-0.0370292	-0.401856			6.06953e-20	19.2168	0	-1.39747	-11.1589	+	+	13.3131	14.7234	13.9053	13.7189	13.8144	13.4646	15.4898	13.7591	14.974	12.808	13.4385	15.914	13.6795	16.2181	15.1572	13.468	14.0656	12.9928
Q99726	SLC30A3	Probable proton-coupled zinc antiporter SLC30A3	Ex	0.000122944	3.91029	0.000113636	-0.199612	-4.31888		+	1.23445e-05	4.90853	4.73934e-06	-0.178507	-4.83238		+	1.05401e-06	5.97715	0.000172352	-0.294847	-5.21542		+	1.58571e-18	17.7998	0	-0.714125	-10.5498	+	+	13.7307	14.6188	14.1728	13.9808	13.9299	14.1491	14.237	13.9088	14.3143	13.79	13.6891	14.6177	13.8249	13.7319	14.3071	13.7554	14.0274	13.7577
Q9UI08	EVL	Ena/VASP-like protein	Undefined	0.00101411	2.99391	0.00141758	0.24057	3.58613		+	0.0485024	1.31424	0.049672	0.0740729	2.02044		+	0.103714	0.984161	0.33694	-0.135391	-1.64271			6.24334e-17	16.2046	0	-0.72092	-9.86434	+	+	12.9265	12.6943	12.256	12.4524	12.3907	12.451	12.698	12.723	12.3902	12.2826	12.0206	12.9325	12.3598	11.9317	12.7808	11.84	12.0607	11.7863
Q5TDH0	DDI2	Protein DDI1 homolog 2	Undefined	0.0199716	1.69959	0.0271397	-0.113951	-2.43832		+	1.98787e-05	4.70161	4.52489e-06	-0.147872	-4.69417		+	8.72532e-07	6.05922	0.00013945	-0.287478	-5.26029		+	4.08805e-16	15.3885	0	-0.589037	-9.51286	+	+	13.9393	13.9415	13.8993	13.7986	13.6876	14.1036	14.279	13.7473	13.7559	13.6114	14.0335	14.2865	14.0161	13.9768	14.1226	13.926	13.8753	13.8103
Q8N3V7-2	SYNPO	Synaptopodin	Undefined	0.000935702	3.02886	0.00131111	-0.160758	-3.61488		+	1.85326e-09	8.73206	0	-0.316389	-7.26754		+	0.787037	0.104005	0.895725	-0.0281711	-0.270916			4.78327e-14	13.3203	0	-0.797426	-8.61558	+	+	15.7797	16.2298	15.6504	15.5961	15.4607	15.7589	16.1129	15.5369	15.3549	15.0118	15.6545	15.8436	15.3198	14.5137	15.9633	14.642	15.6631	14.6915
P57105	SYNJ2BP	Synaptojanin-2-binding protein	Undefined	0.660483	0.180138	0.724782	0.0388649	0.443123			0.212751	0.672128	0.225053	-0.110254	-1.26624			0.254118	0.594965	0.524237	-0.126106	-1.14758			7.29241e-10	9.13713	0	-0.718449	-6.78537	+	+	13.2452	13.0054	NaN	12.1146	12.3285	12.606	12.4342	12.1735	12.5639	12.8767	12.2437	13.1219	13.5269	12.4865	13.2747	13.0345	12.6262	12.3852
O00451	GFRA2	GDNF family receptor alpha-2	Undefined	0.0656187	1.18297	0.0882949	-0.0963018	-1.90058			0.801535	0.0960778	0.82118	0.0182808	0.252676			0.319279	0.495829	0.585052	0.0747593	1.00119			1.24462e-09	8.90496	0	-0.780933	-6.62765	+	+	12.6488	12.6349	13.3491	12.8636	12.447	13.5631	14.019	12.9687	13.4119	12.2694	10.8902	13.752	12.5651	13.1519	13.2417	12.252	13.2014	12.0941
P48539	PCP4	Calmodulin regulator protein PCP4	Neuron	0.797054	0.098512	0.840964	0.0149481	0.259128			0.188517	0.72465	0.1997	0.102797	1.33395			0.334215	0.475973	0.596903	0.0954995	0.970542			1.31298e-09	8.88174	0	-0.699286	-6.62199	+	+	13.8474	14.2543	14.1667	14.1793	14.2374	14.495	15.0613	14.6786	15.4463	13.9606	14.6111	15.1554	14.1588	13.2279	14.6846	13.6271	14.6278	13.6996
P84074	HPCA	Neuron-specific calcium-binding protein hippocalcin	Undefined	0.00115127	2.93882	0.00153681	-0.459519	-3.68909		+	0.629192	0.201217	0.649148	0.0893355	0.488641			0.121831	0.914241	0.365799	-0.237082	-1.56415			4.38165e-09	8.35836	0	-1.12417	-6.5666	+	+	11.2961	10.5083	10.4147	NaN	10.7711	11.372	10.9094	11.0375	NaN	10.8319	11.4524	11.0793	9.81037	12.0272	11.3103	NaN	NaN	11.9983
Q9UK76	JPT1	Jupiter microtubule associated homolog 1	Undefined	0.278113	0.555778	0.345302	-0.0597492	-1.10169			0.00828675	2.08162	0.00733955	-0.146339	-2.74506		+	0.152657	0.816284	0.407255	0.126969	1.44164			1.40855e-08	7.85123	0	-0.592999	-6.1163	+	+	13.3665	13.5172	13.5344	12.8758	12.7203	13.2613	13.7368	13.0785	13.1742	12.599	12.3816	13.5793	12.8617	11.7844	13.247	11.7919	13.0392	11.9374
O75592	MYCBP2	E3 ubiquitin-protein ligase MYCBP2	In	0.585956	0.232135	0.66245	0.0670229	0.552143			0.0632692	1.19881	0.0655447	0.56286	1.92414			0.877053	0.0569742	0.941295	-0.0173682	-0.155162			1.65662e-07	6.78078	1.25e-05	-1.14389	-5.65674	+	+	11.9613	11.9318	11.5317	10.9977	NaN	10.6083	11.3426	11.3084	14.3153	10.9507	10.8377	NaN	11.0095	9.48976	11.8926	15.0621	NaN	9.53275
Q9Y566	SHANK1	SH3 and multiple ankyrin repeat domains protein 1	Undefined	0.210013	0.677753	0.267661	-0.125169	-1.27923			0.015653	1.8054	0.0145178	-0.551174	-2.53371		+	0.000232144	3.63424	0.00804633	-0.471381	-3.83037		+	1.98612e-07	6.70199	1.21951e-05	-0.747039	-5.56524	+	+	12.2534	10.9624	13.4363	10.1898	9.80835	10.2994	11.4704	12.2132	11.6017	10.3796	11.3963	12.7701	11.6335	11.8365	11.912	NaN	12.218	11.2416
Q6IPX3	TCEAL6	Transcription elongation factor A protein-like 6	Undefined	0.00891134	2.05006	0.0116615	-0.362693	-2.81896		+	0.145187	0.838072	0.15481	-0.37845	-1.50012			0.0522732	1.28172	0.23794	0.264698	1.96949			2.67583e-06	5.57254	8.90869e-06	-0.997267	-5.00847	+	+	12.3703	11.8432	11.4815	11.219	11.5231	14.9558	11.8663	11.9895	12.3274	NaN	11.5394	12.5968	10.534	NaN	15.567	10.1262	11.961	11.3134
P02585	TNNC2	Troponin C, skeletal muscle	Undefined	0.0771252	1.1128	0.103067	1.3112	1.97015			0.289366	0.538552	0.304615	0.931451	1.13467			0.000617315	3.20949	0.0163893	-1.86046	-3.60196	+	+	2.79263e-05	4.55399	5.36913e-05	-2.24346	-4.49839	+	+	NaN	11.677	NaN	9.75423	9.76256	NaN	9.98928	10.9998	10.59	NaN	NaN	NaN	10.4502	10.2933	10.7316	NaN	10.4923	NaN
P21359	NF1	Neurofibromin	In	0.077519	1.11059	0.103553	-0.935969	-1.84101			0.913276	0.0393981	0.921251	-0.0744589	-0.110367			0.000733304	3.13472	0.0181678	-0.84995	-3.55664	+	+	3.62873e-05	4.44025	6.48298e-05	-1.49177	-4.46842	+	+	11.7945	11.1862	12.3029	NaN	NaN	9.31436	9.22698	NaN	NaN	11.7757	8.38992	10.2168	7.52569	9.39483	NaN	10.8949	8.53301	NaN
Q9Y295	DRG1	Developmentally-regulated GTP-binding protein 1	Undefined	0.910502	0.0407192	0.932693	0.0229147	0.114456			0.325835	0.487002	0.344329	0.175977	0.993893			2.91119e-07	6.53593	1.64271e-05	-0.623361	-5.68309	+	+	4.8764e-05	4.3119	0.000106918	-0.706675	-4.25215	+	+	11.639	11.5759	12.3987	11.7996	14.8862	12.5108	11.7545	15.0561	12.2468	12.2714	12.6658	14.3932	12.1809	11.3586	11.5256	11.5875	14.4733	NaN
Q9UKX2	MYH2	Myosin-2	Undefined	0.0369089	1.43287	0.0503952	-0.772078	-2.34707			0.185277	0.732179	0.196526	2.93915	1.53541			0.223313	0.651087	0.491708	-0.529412	-1.23072			5.88365e-05	4.23035	0.000166924	-2.71939	-4.3468	+	+	NaN	11.7271	NaN	NaN	NaN	0.652723	11.4242	11.4532	NaN	NaN	NaN	NaN	NaN	NaN	9.35877	NaN	10.9542	11.8811
P13535	MYH8	Myosin-8	Undefined	0.159074	0.798401	0.207028	0.800187	1.5015			0.353588	0.451503	0.372842	0.638916	0.948652			0.00327741	2.48447	0.048518	-1.20851	-3.04205	+	+	6.25683e-05	4.20365	0.000177642	-1.92996	-4.21254	+	+	10.6839	NaN	NaN	9.77757	12.5878	15.2921	12.246	NaN	11.7242	10.7959	10.1027	NaN	11.3978	0.829162	10.7778	12.5993	10.5152	NaN
P29590	PML	Protein PML	Undefined	0.116185	0.934851	0.153557	0.606347	1.76148			0.162078	0.790276	0.172462	0.406757	1.4407			0.213326	0.670957	0.480754	-0.254375	-1.26628			9.97008e-05	4.0013	0.000286131	-0.953158	-4.19063	+	+	9.476	12.2617	11.2183	11.5346	12.1284	NaN	NaN	11.8711	15.7686	NaN	11.3119	10.8596	NaN	12.265	NaN	11.0777	NaN	NaN
Q96MM6	HSPA12B	Heat shock 70 kDa protein 12B	Undefined	0.659929	0.180503	0.724388	0.205209	0.462635			0.121242	0.916345	0.129459	-0.463809	-1.58707			0.000424283	3.37234	0.0124723	-1.64119	-3.72835	+	+	0.000118471	3.92639	0.000307255	-1.18294	-4.01744	+	+	NaN	14.3615	NaN	NaN	15.4806	14.7675	15.2532	12.9199	NaN	NaN	NaN	NaN	NaN	NaN	15.9942	NaN	15.4485	16.7153
P62847	RPS24	40S ribosomal protein S24	Ex	0.552865	0.257381	0.629359	-0.104097	-0.601274			0.338682	0.470209	0.357396	-0.257649	-0.970043			1.06786e-06	5.97148	0.000172043	-0.598418	-5.24456	+	+	0.000251729	3.59907	0.000632944	-0.623576	-3.79523	+	+	14.5328	10.5399	9.80701	NaN	NaN	10.6454	14.6388	12.6108	12.589	12.6976	14.7794	14.9061	12.8108	10.8668	14.8279	NaN	14.377	14.4813
P30711	GSTT1	Glutathione S-transferase theta-1	Undefined	0.375878	0.424953	0.450422	0.289835	0.903827			0.115678	0.936747	0.123456	0.830663	1.61443			3.02602e-05	4.51913	0.0016638	-0.998013	-4.42405	+	+	0.000293381	3.53257	0.000748092	-1.23254	-3.76484	+	+	10.1764	9.68109	9.04361	NaN	13.1614	10.1889	9.75912	9.34375	13.7606	NaN	7.80168	12.8727	NaN	10.1811	9.26222	10.2224	8.56601	13.4649
P61923	COPZ1	Coatomer subunit zeta-1	Undefined	0.29121	0.535793	0.359248	-0.200875	-1.08029			0.24039	0.619083	0.252831	-0.145492	-1.1901			0.000566726	3.24663	0.0153183	-0.751348	-3.5929	+	+	0.000327188	3.4852	0.00079203	-0.755258	-3.72302	+	+	11.3245	10.7227	7.4249	10.735	9.68337	9.65641	11.0334	10.6253	12.3329	10.9709	11.0939	11.5952	10.9464	11.1012	8.76719	10.8808	10.5018	10.3427
Q15700-3	DLG2	Disks large homolog 2	Undefined	0.591708	0.227893	0.666418	-0.10404	-0.543069			0.187821	0.726255	0.198919	-0.234627	-1.34408			0.265382	0.576129	0.534743	0.197099	1.12115			0.000450116	3.34668	0.00101887	-0.755245	-3.62916	+	+	11.6109	11.3624	11.0245	NaN	NaN	12.8522	12.115	15.2568	12.4388	11.8714	13.2371	12.8431	12.4913	11.9975	11.2642	11.9634	12.4867	13.4925
P41208	CETN2	Centrin-2	Undefined	0.611326	0.213727	0.683225	0.478468	0.514638			0.676848	0.169509	0.696889	-0.308921	-0.419695			0.000925823	3.03347	0.0214393	-2.54874	-3.43713	+	+	0.000472965	3.32517	0.0010726	-2.59074	-3.61466	+	+	NaN	0.240875	0.637848	0.00138943	-0.462372	-0.391907	7.36313	-0.345457	-0.258654	-0.628629	-0.24132	NaN	-0.197237	-0.170772	0.621606	6.88862	NaN	8.30545
P17540	CKMT2	Creatine kinase S-type, mitochondrial	Undefined	0.434185	0.362325	0.512014	-1.83025	-0.818542			0.0587585	1.23093	0.0607031	-5.41855	-2.32853			0.0213306	1.671	0.146623	-3.12862	-2.37532			0.000531028	3.27488	0.001219	-4.81716	-3.67277	+	+	NaN	NaN	NaN	0.548761	NaN	12.2459	11.258	NaN	NaN	NaN	0.306061	NaN	NaN	NaN	12.4684	NaN	NaN	NaN
Q96NT1	NAP1L5	Nucleosome assembly protein 1-like 5	Undefined	0.256863	0.590299	0.322995	0.295139	1.16555			0.573837	0.241211	0.592628	0.675549	0.571787			0.161022	0.793113	0.418545	-0.333695	-1.41643			0.000544802	3.26376	0.00122864	-2.62254	-3.60486	+	+	8.23364	NaN	14.6535	14.0983	13.98	14.7588	9.01066	14.2888	14.9549	6.59408	1.61985	NaN	9.02976	NaN	1.982	NaN	14.7654	1.95613
A0A0C4DH29	IGHV1-3	Immunoglobulin heavy variable 1-3	Undefined	0.551282	0.258626	0.628371	-0.128942	-0.602868			0.605329	0.218009	0.625498	0.186191	0.521463			0.141714	0.848587	0.393549	-0.213082	-1.48447			0.000803124	3.09522	0.00180367	-0.798091	-3.47339	+	+	12.0393	12.5247	13.6977	17.3538	14.8576	13.0624	13.8789	16.1251	NaN	13.8302	10.6203	12.8632	16.7817	13.757	11.0845	13.443	14.9937	17.0037
Q9HCK4	ROBO2	Roundabout homolog 2	Neuron	0.535909	0.270909	0.613081	-0.156774	-0.628871			0.0769438	1.11383	0.0815795	1.0203	1.8557			3.24889e-05	4.48826	0.00175243	-0.925856	-4.41876	+	+	0.000867058	3.06195	0.00195736	-1.35433	-3.46072	+	+	10.79	11.1585	10.6523	NaN	9.75212	10.4494	NaN	NaN	6.96357	NaN	10.5169	7.12374	11.4609	NaN	9.74631	9.25852	10.2868	10.3041
Q8NF37	LPCAT1	Lysophosphatidylcholine acyltransferase 1	Undefined	0.748	0.126098	0.801302	0.0463039	0.324152			0.827081	0.0824521	0.84633	-0.0579019	-0.220089			0.165617	0.780896	0.42438	0.26549	1.39845			0.000912632	3.0397	0.00208034	-0.73585	-3.4251	+	+	7.29845	11.8477	12.2686	12.0708	12.2224	11.8817	12.5188	12.2076	10.3183	12.7135	12.0374	12.8439	10.12	11.8301	9.39892	9.35463	8.56125	11.699
Q8N1F7	NUP93	Nuclear pore complex protein Nup93	Undefined	0.749783	0.125064	0.801905	0.0304328	0.322199			0.617731	0.209201	0.637902	-0.109427	-0.503976			2.67812e-12	11.5722	0	-1.23163	-8.36183	+	+	0.000939514	3.0271	0.00213445	-0.683151	-3.42804	+	+	11.4732	10.1708	13.3391	13.8835	14.0385	11.8834	13.0444	13.4981	11.4505	13.7678	11.4902	11.7139	10.5292	10.8224	12.7028	13.3012	13.2421	13.2997
Q9NQ86	TRIM36	E3 ubiquitin-protein ligase TRIM36	Undefined	0.272395	0.564801	0.338322	-0.243006	-1.13672			0.898555	0.0464551	0.909901	-0.147811	-0.144208			0.459039	0.338151	0.695553	-0.172315	-0.745875			0.00104872	2.97934	0.00237591	-1.80795	-3.50411	+	+	9.98507	NaN	NaN	NaN	NaN	NaN	NaN	NaN	NaN	NaN	NaN	NaN	10.5082	NaN	9.26362	NaN	NaN	NaN
Q15428	SF3A2	Splicing factor 3A subunit 2	Undefined	0.84553	0.072871	0.882138	0.0237117	0.196577			0.824988	0.0835521	0.8453	0.0480307	0.222553			0.0393409	1.40516	0.204809	0.290735	2.09367			0.00146615	2.83382	0.00324431	-0.600928	-3.27592	+	+	11.3149	10.0879	13.0402	NaN	10.8502	10.7846	10.4259	13.0727	13.168	11.4009	9.44575	10.1236	9.35295	7.77237	9.53806	12.2579	12.346	12.4625
P42330	AKR1C3	Aldo-keto reductase family 1 member C3	Undefined	0.267739	0.572288	0.333978	-1.23472	-1.17363			0.207379	0.683235	0.219053	0.503167	1.37174			0.00394376	2.40409	0.0543972	-3.0556	-3.36463			0.00181881	2.74021	0.00392352	-7.12603	-3.6895	+	+	NaN	11.1241	NaN	9.74288	10.4617	10.1689	2.81626	9.41761	9.41585	10.7765	12.101	NaN	NaN	NaN	NaN	NaN	NaN	11.4445
Q5JTZ9	AARS2	Alanine--tRNA ligase, mitochondrial	Undefined	0.598265	0.223106	0.671995	0.883926	0.57146			0.204907	0.688444	0.216867	-1.10619	-1.32529			0.209931	0.677923	0.476787	-1.47492	-1.27593			0.00201421	2.6959	0.00434405	-2.26285	-3.23182	+	+	NaN	NaN	11.1095	10.81	9.54753	NaN	9.45516	10.4121	11.3232	8.77411	11.1544	9.46546	NaN	11.0863	9.84632	NaN	NaN	11.043
P06732	CKM	Creatine kinase M-type	Undefined	0.396473	0.401786	0.472746	0.142793	0.858472			0.258086	0.588235	0.272115	-0.1199	-1.14346			4.81368e-05	4.31752	0.00238882	-1.00907	-4.25767	+	+	0.00231802	2.63488	0.00493657	-0.610851	-3.11688	+	+	14.5442	15.3584	14.376	14.3018	13.9137	13.8831	14.3367	14.0326	13.8222	14.2933	14.1293	14.2885	12.8598	14.4586	14.3724	14.4474	14.5731	14.7966
Q8WXS5	CACNG8	Voltage-dependent calcium channel gamma-8 subunit	Neuron	0.349686	0.456322	0.421368	-0.10015	-0.950035			0.475443	0.322901	0.495055	0.157853	0.722433			0.138038	0.860001	0.388	-0.173164	-1.4974			0.0023696	2.62532	0.0050325	-0.652834	-3.12826	+	+	10.0478	10.0497	12.1949	12.9384	12.6055	12.2746	10.4362	12.4644	12.6002	11.8005	11.8692	9.87808	11.9108	NaN	13.0237	NaN	11.9707	NaN
Q7Z739	YTHDF3	YTH domain-containing family protein 3	Undefined	0.680569	0.167128	0.74316	-0.046862	-0.415727			0.519829	0.28414	0.53777	-0.197543	-0.649067			0.00770434	2.11326	0.0813922	0.513382	2.72399			0.00269084	2.57011	0.00569091	-0.751462	-3.07203	+	+	11.981	11.1284	12.2767	11.123	9.86387	11.0104	11.4557	9.79713	12.2525	11.9348	11.9312	11.9839	11.386	11.4498	12.0554	11.8349	11.627	10.9872
Q8IUQ0	CLVS1	Clavesin-1	Undefined	0.723445	0.140595	0.78144	0.0607103	0.357197			0.247453	0.606507	0.260743	-0.346533	-1.17565			0.00186047	2.73038	0.0337251	-0.805912	-3.21608	+	+	0.00337409	2.47184	0.00715901	-1.02438	-3.00886	+	+	12.8744	12.8376	2.08827	9.87965	12.3401	6.95892	8.89232	12.1451	9.1436	8.96992	9.23087	12.9151	12.7205	9.02302	12.9944	12.5203	9.0223	12.268
Q96A32	MYL11	Myosin regulatory light chain 11	Undefined	0.996941	0.0013306	0.997687	-0.000991004	-0.00399644			0.417835	0.378996	0.436544	0.221878	0.831671			0.0116685	1.93298	0.103842	-0.983637	-2.60031			0.00394109	2.40438	0.00818419	-0.889175	-2.97494	+	+	12.725	11.6616	NaN	NaN	NaN	12.5984	11.7142	14.8328	NaN	13.2983	11.6006	NaN	11.8865	12.4633	12.5758	13.0981	13.8889	NaN
Q12874	SF3A3	Splicing factor 3A subunit 3	Undefined	0.936175	0.0286429	0.952118	0.0171577	0.0807307			0.490694	0.309189	0.508952	0.146375	0.694651			0.00014847	3.82836	0.00597556	-0.782444	-3.97034	+	+	0.00407395	2.38998	0.00847364	-0.615239	-2.93889	+	+	13.8593	13.1375	13.9258	9.34803	13.8657	13.6596	12.8643	13.3577	15.5597	14.875	14.6507	14.1713	13.9224	14.9643	14.4563	14.6797	14.3209	15.2793
P61006	RAB8A	Ras-related protein Rab-8A	Undefined	0.189398	0.722625	0.243294	-0.18398	-1.36395			0.646308	0.18956	0.665063	-0.0799674	-0.468973			0.195431	0.709006	0.461267	0.206107	1.31224			0.0044018	2.35637	0.00905802	-0.585368	-2.97779	+	+	11.735	11.8972	NaN	NaN	NaN	NaN	NaN	10.5328	10.6561	11.4583	10.8284	9.93179	10.5166	NaN	10.8151	10.6257	NaN	11.0243
Q96RL7	VPS13A	Intermembrane lipid transfer protein VPS13A	Undefined	0.0903863	1.0439	0.120172	-1.01865	-1.75875			0.798396	0.0977816	0.818545	-0.10074	-0.257494			0.000217606	3.66233	0.00775439	-1.23171	-3.86357	+	+	0.00532453	2.27372	0.0107221	-0.858326	-2.84969	+	+	10.9716	11.4464	10.0971	10.7161	NaN	9.61325	11.855	8.30904	10.943	NaN	10.6825	9.67894	11.4895	9.70723	9.89752	6.7154	0.490483	8.28712
P51688	SGSH	N-sulphoglucosamine sulphohydrolase	Undefined	0.00643329	2.19157	0.00815494	0.428059	2.95377		+	0.00409271	2.38799	0.0034396	0.378567	3.05075		+	0.000176409	3.75348	0.00669591	-0.777015	-3.99985	+	+	0.00576462	2.23923	0.0115581	-0.594284	-2.84589	+	+	12.7394	11.5672	12.3831	13.2703	13.3581	12.2605	12.0359	12.6337	NaN	12.6794	12.76	12.6568	12.4622	12.4115	14.2605	13.0646	12.9938	12.5077
P05976	MYL1	Myosin light chain 1/3, skeletal muscle isoform	Undefined	0.932478	0.0303612	0.94939	0.109536	0.0883436			1	0	1	-10.1346	0			0.443025	0.353571	0.683703	-1.02404	-0.77349			0.00583682	2.23382	0.0117202	-4.39598	-2.88847	+	+	9.62457	NaN	NaN	NaN	NaN	NaN	2.05931	NaN	NaN	1.67619	2.06349	NaN	NaN	NaN	NaN	NaN	9.49463	NaN
Q08AI8	MAB21L4	Protein mab-21-like 4	Undefined	0.868448	0.061256	0.899162	-0.0570847	-0.170421			0.338341	0.470645	0.357113	0.299763	1.01118			0.0571162	1.24324	0.248418	0.488092	1.95753			0.00616145	2.21032	0.0123173	-0.818122	-2.87127	+	+	10.5682	12.9416	NaN	NaN	NaN	12.7934	13.2165	NaN	NaN	NaN	14.2798	14.4197	14.2049	13.5067	NaN	NaN	NaN	NaN
O14983	ATP2A1	Sarcoplasmic/endoplasmic reticulum calcium ATPase 1	Undefined	1	0	0.986805	NaN	0			1	0	1	0.312034	0			0.296306	0.52826	0.564336	3.22708	1.07393			0.0074651	2.12696	0.0147844	-6.2384	-2.94637	+	+	NaN	NaN	NaN	NaN	NaN	NaN	NaN	NaN	3.18897	NaN	NaN	NaN	NaN	NaN	NaN	NaN	NaN	NaN
Q9UMZ2	SYNRG	Synergin gamma	Undefined	0.171301	0.76624	0.221174	-0.312068	-1.40849			0.529856	0.275842	0.547076	0.414998	0.637466			0.0393129	1.40547	0.204816	-0.42447	-2.09319			0.00898564	2.04645	0.0175216	-1.03123	-2.67057	+	+	11.1253	11.2081	11.2681	NaN	NaN	11.5373	10.8597	11.9886	10.8287	NaN	8.5226	8.35151	NaN	7.98239	10.8257	7.76576	11.9902	11.503
Q9P2M7	CGN	Cingulin	Undefined	0.165521	0.781148	0.214601	3.31558	1.57853			0.14842	0.828508	0.158295	1.76645	1.51391			0.00658959	2.18114	0.0740342	-3.87283	-3.07059			0.00997661	2.00102	0.0191691	-3.36627	-2.72475	+	+	0.392282	0.537983	NaN	0.298498	6.23216	3.61686	NaN	-0.0483487	8.24973	7.40304	NaN	NaN	7.90336	0.126337	NaN	8.43188	0.359179	10.2853
Q8NE35	CPEB3	Cytoplasmic polyadenylation element-binding protein 3	Undefined	0.633549	0.19822	0.702702	-0.111226	-0.481201			0.547949	0.26126	0.566556	-0.12908	-0.606116			0.0156734	1.80484	0.1238	-0.803661	-2.46318			0.0107643	1.96801	0.0204488	-0.728185	-2.59896	+	+	10.8899	7.20888	11.9325	11.166	11.5804	9.48915	8.42107	11.5105	11.612	11.454	11.6531	11.6862	12.5498	12.1729	11.167	12.3503	12.6112	13.5923
P12882	MYH1	Myosin-1	Undefined	0.0461442	1.33588	0.0626989	0.404433	2.07211			0.435692	0.360821	0.454578	-0.152452	-0.785677			0.00287713	2.54104	0.0446384	-0.881581	-3.05998	+	+	0.0108178	1.96586	0.020559	-0.659612	-2.59185	+	+	13.2486	12.6174	15.2235	13.7039	13.6046	13.8635	14.0696	13.5894	13.9353	13.6851	14.287	13.4952	13.8017	12.5929	13.0025	13.3495	13.6297	13.1904
Q8NEX9	SDR9C7	Short-chain dehydrogenase/reductase family 9C member 7	Undefined	0.0834954	1.07834	0.11125	1.63907	1.87457			0.245065	0.610719	0.258134	1.21056	1.20167			8.11386e-05	4.09077	0.00359389	-2.27923	-4.22989	+	+	0.0108922	1.96289	0.0206289	-1.58192	-2.60944	+	+	NaN	0.613656	NaN	12.6703	12.8683	-0.0191264	11.1169	11.8439	NaN	9.31713	NaN	NaN	10.2246	11.6594	12.5127	NaN	11.0115	11.1409
Q92609	TBC1D5	TBC1 domain family member 5	Oli	0.258961	0.586765	0.324629	-0.420755	-1.15512			0.167525	0.77592	0.178293	-0.72998	-1.41836			0.540362	0.267316	0.749815	0.175524	0.614874			0.0117793	1.92888	0.0222882	-0.914952	-2.57356	+	+	12.51	12.5535	10.5369	NaN	NaN	11.7409	12.2397	NaN	10.9222	6.93795	9.3284	9.21018	12.5849	11.6153	12.4582	12.0236	11.1835	NaN
Q14134	TRIM29	Tripartite motif-containing protein 29	Undefined	0.572872	0.241942	0.649525	0.478034	0.61324			0.217794	0.661954	0.230471	-1.30596	-1.27711			0.1641	0.784891	0.422167	-0.72162	-1.41449			0.0144297	1.84074	0.026842	-1.23696	-2.51959	+	+	NaN	NaN	NaN	13.2932	13.6787	9.7442	12.8041	11.2565	NaN	12.39	NaN	NaN	8.01912	NaN	13.5887	13.3705	13.8071	NaN
P01861	IGHG4	Immunoglobulin heavy constant gamma 4	Undefined	0.943971	0.0250413	0.958899	-0.0288926	-0.071466			0.177386	0.751082	0.188552	0.5407	1.38246			0.364171	0.438694	0.621597	0.481801	0.914277			0.0166917	1.7775	0.0305455	-1.26377	-2.44903	+	+	NaN	10.2082	NaN	NaN	11.7854	10.9898	10.3121	10.1724	11.3883	11.3984	9.24676	NaN	8.91109	NaN	11.8599	NaN	8.18902	8.82182
P29120	PCSK1	Neuroendocrine convertase 1	Undefined	0.10932	0.9613	0.144392	0.729722	1.64864			0.226323	0.645271	0.239031	0.659023	1.23221			6.05291e-06	5.21804	0.000469208	-1.44592	-4.80578	+	+	0.0189645	1.72206	0.0347626	-1.04827	-2.38706	+	+	8.08929	2.235	10.8279	1.99551	8.89591	11.0263	12.7836	10.9647	1.73548	7.78233	NaN	12.8937	10.8401	1.82336	11.6945	NaN	10.1933	6.97194
O60242	ADGRB3	Adhesion G protein-coupled receptor B3	Neuron	0.0790151	1.10229	0.105732	-0.451671	-1.82052			0.869975	0.0604931	0.884819	0.0549132	0.165008			0.633751	0.198082	0.810848	-0.126128	-0.478139			0.0200144	1.69866	0.0365374	-0.620598	-2.36472	+	+	11.7811	11.4097	NaN	NaN	11.2708	10.9911	11.1388	10.2396	12.6558	11.3424	12.0385	11.7444	10.5509	11.4748	NaN	10.8777	10.0063	11.0042
Q9BY89	KIAA1671	Uncharacterized protein KIAA1671	Undefined	0.427821	0.368738	0.505523	0.188839	0.816624			0.0463764	1.3337	0.0472228	0.522389	2.27246		+	0.0644958	1.19047	0.264409	0.479018	1.88807			0.0203004	1.6925	0.0369604	-0.650023	-2.39135	+	+	11.8601	11.4013	NaN	NaN	NaN	NaN	10.7679	NaN	NaN	11.4017	12.1001	10.7511	11.3811	9.49477	NaN	11.4394	NaN	9.5371
P32320	CDA	Cytidine deaminase	Undefined	0.761844	0.118134	0.810766	0.253745	0.32009			0.0768013	1.11463	0.0814422	0.599101	1.84908			0.913218	0.0394255	0.95859	-0.0596453	-0.109639			0.0208838	1.68019	0.0379864	-0.776365	-2.36682	+	+	13.1372	NaN	NaN	15.5489	15.2868	12.1903	12.6051	15.633	NaN	15.844	NaN	13.289	11.5226	14.0521	15.7243	14.962	15.0779	NaN
O14732	IMPA2	Inositol monophosphatase 2	Undefined	0.529777	0.275907	0.606816	0.310467	0.66097			0.22367	0.650393	0.236042	0.332492	1.24779			0.531135	0.274795	0.743383	0.161137	0.63115			0.0214864	1.66784	0.0388691	-0.791961	-2.3545	+	+	NaN	NaN	14.8183	15.0061	14.7698	14.7365	NaN	15.2248	14.9087	15.1859	NaN	NaN	13.5573	16.7933	14.2596	11.2786	12.0781	NaN
P12883	MYH7	Myosin-7	Undefined	0.0717906	1.14393	0.0962063	0.292288	1.86418			0.230228	0.637842	0.242637	0.537062	1.21745			0.0339705	1.4689	0.189753	-0.493229	-2.15256			0.0217739	1.66206	0.0393473	-0.947162	-2.32867	+	+	10.4289	3.50505	3.90202	3.26556	14.6951	18.2762	13.4424	12.3507	14.8159	13.7545	14.6014	NaN	14.3426	13.6903	NaN	14.0144	14.6535	14.4996
P30838	ALDH3A1	Aldehyde dehydrogenase, dimeric NADP-preferring	Undefined	0.78886	0.103	0.835136	-0.0960364	-0.270465			0.650654	0.18665	0.669344	-0.11916	-0.455834			0.00802366	2.09563	0.0831938	-0.686232	-2.71358			0.0218707	1.66014	0.039467	-0.588007	-2.32759	+	+	10.6186	11.4472	12.0898	8.83423	11.7075	10.9651	10.9406	10.6691	13.0328	13.4241	14.524	14.3487	13.7263	14.617	14.7285	15.7702	15.0566	14.8616
Q8WWY7	WFDC12	WAP four-disulfide core domain protein 12	Undefined	0.549238	0.26024	0.626243	-0.535295	-0.625225			0.491956	0.308074	0.510206	0.28081	0.700056			0.833351	0.0791719	0.919443	-0.0846685	-0.211266			0.0246697	1.60784	0.043865	-1.26815	-2.29033	+	+	NaN	1.42658	14.1116	12.5251	10.3054	11.0383	NaN	11.7861	13.3387	NaN	NaN	15.0495	13.4913	12.9141	13.402	14.6339	14.5838	13.7089
Q9BRP8	PYM1	Partner of Y14 and mago	Undefined	0.224923	0.647966	0.285916	-0.223915	-1.24094			0.77017	0.113414	0.79057	-0.208403	-0.294365			0.052704	1.27816	0.239017	0.321406	1.96618			0.0274875	1.56086	0.0486301	-0.988	-2.2394	+	+	2.55654	9.30508	3.22297	12.7767	13.7296	13.6843	9.25897	13.6012	12.1071	13.055	13.8038	13.5314	2.38788	NaN	2.70594	12.7202	13.2009	12.5861
O43488	AKR7A2	Aflatoxin B1 aldehyde reductase member 2	Undefined	0.0448996	1.34776	0.0612407	0.112177	2.08014			6.63558e-16	15.1781	0	0.27909	11.5031		+	8.31925e-23	22.0799	0	0.638973	12.9602	+	+	7.13086e-08	7.14686	0	0.268067	5.76726		+	15.584	15.038	15.2427	14.9446	15.1342	15.236	14.9559	14.8478	15.0546	15.163	15.5161	15.0179	15.2415	15.3006	14.8249	15.0996	15.0404	15.2389
P52272	HNRNPM	Heterogeneous nuclear ribonucleoprotein M	Undefined	0.5587	0.252821	0.635066	-0.0323724	-0.590423			0.000573829	3.24122	0.000439149	-0.169698	-3.66899		+	1.88674e-21	20.7243	0	0.732069	12.3062	+	+	8.90975e-07	6.05013	1.0101e-05	0.295033	5.20149		+	15.5921	15.1216	15.5762	14.7826	15.2722	15.2575	14.9848	14.9189	15.1028	15.262	15.456	15.3816	15.3055	15.2097	14.9707	15.2537	15.2892	15.2088
Q15843	NEDD8	NEDD8	Undefined	0.35618	0.448331	0.429244	-0.0664966	-0.935029			0.0607122	1.21672	0.0628454	-0.129944	-1.91721			2.6633e-20	19.5746	0	1.01224	11.758	+	+	0.00642264	2.19229	0.0127811	0.288016	2.7771		+	17.0441	16.8418	17.0646	15.9489	16.297	16.8665	16.9721	16.507	16.6576	16.1982	16.5335	16.6759	16.8152	16.4156	16.8991	16.3624	16.4939	16.3505
Q9H330	TMEM245	Transmembrane protein 245	Undefined	0.0406838	1.39058	0.0556937	-0.0852469	-2.12542			1.51118e-10	9.82068	0	-0.204655	-7.9529		+	8.93566e-18	17.0489	0	0.619449	10.5696	+	+	0.0280286	1.5524	0.0495864	0.110126	2.22556		+	15.7348	15.6391	15.554	14.9285	15.1742	15.3724	15.1775	15.318	15.0376	15.077	15.0586	14.8461	14.5172	14.8593	14.9283	15.1703	14.9301	14.8936
Q9HD42	CHMP1A	Charged multivesicular body protein 1a	Undefined	0.539048	0.268373	0.615527	-0.0424045	-0.620528			0.127249	0.895346	0.135673	0.197025	1.55193			1.2111e-17	16.9168	0	0.868331	10.5079	+	+	0.244043	0.612534	0.33227	0.143748	1.17122			9.80494	15.6235	13.2401	15.4437	17.0919	15.1781	15.1166	15.6855	15.0655	15.4378	15.2251	14.8139	15.1884	15.0768	14.7693	14.9455	15.2449	15.2533
Q8IXS6-2	PALM2	Paralemmin-2	Undefined	0.0139034	1.85688	0.0186439	-0.119231	-2.58976		+	0.000113372	3.94549	7.07269e-05	-0.17451	-4.17626		+	8.59134e-17	16.0659	0	0.65652	10.111	+	+	0.13395	0.873058	0.200104	-0.0842464	-1.50955			15.5304	15.4389	15.2935	15.0307	14.7378	15.2633	15.2921	14.8275	15.2288	15.047	15.2737	15.1684	15.0624	15.1062	15.2412	15.4694	14.9295	15.1122
O43813	LANCL1	Glutathione S-transferase LANCL1	Undefined	1.50709e-06	5.82186	0	-0.246541	-5.77962		+	0.0156779	1.80471	0.0145436	-0.0744411	-2.49832		+	1.70142e-15	14.7692	0	0.593853	9.50744	+	+	0.000175884	3.75477	0.00043962	0.252624	3.88026		+	18.0264	17.6961	17.2397	17.5778	17.1914	17.5291	17.5944	17.5266	17.3138	17.7994	17.5017	17.4995	17.682	17.9689	17.5253	17.5541	17.521	17.7843
Q9NWV8	BABAM1	BRISC and BRCA1-A complex member 1	Undefined	0.0166309	1.77908	0.0223151	0.132215	2.51544		+	0.92272	0.0349303	0.930224	-0.00311295	-0.0974805			3.69802e-15	14.432	0	0.638173	9.35055	+	+	0.00705786	2.15133	0.0140257	-0.153623	-2.74418		+	15.0119	14.8365	15.0705	14.6454	14.5678	14.5523	14.8014	14.702	14.5764	14.6393	14.3466	14.2414	13.993	13.8251	14.7573	14.5156	14.4256	13.9892
A6NGN9	IGLON5	IgLON family member 5	Undefined	0.00136526	2.86478	0.00173595	-0.233134	-3.47919		+	0.000251568	3.59934	0.000176309	-0.349981	-3.95464		+	8.22987e-14	13.0846	0	0.926786	8.72241	+	+	0.000790099	3.10232	0.00176381	-0.453896	-3.45044		+	12.3289	12.9888	12.4417	11.9361	12.1046	12.4433	12.5996	12.8446	12.3752	11.9952	11.5539	12.8304	12.6342	11.8807	12.1883	11.616	11.9355	12.0123
Q15042-3	RAB3GAP1	Rab3 GTPase-activating protein catalytic subunit	Undefined	0.238251	0.622966	0.3019	-0.0873338	-1.19987			0.189031	0.723467	0.200163	-0.0586074	-1.33089			1.36447e-13	12.865	0	0.678585	8.61974	+	+	0.219481	0.658603	0.305718	0.0861147	1.23476			13.9688	13.7633	13.3575	12.8583	13.116	13.5644	13.4783	13.4444	13.1186	13.1126	12.9614	13.5217	13.3969	13.2228	13.411	12.9323	13.2279	13.26
Q13613	MTMR1	Myotubularin-related protein 1	Undefined	0.536868	0.270132	0.613716	0.0669117	0.627853			0.490581	0.30929	0.509046	-0.269269	-0.704632			1.48503e-13	12.8283	0	1.22841	9.23001	+	+	0.0144742	1.8394	0.0269114	0.438373	2.50507		+	9.58043	12.8933	13.0364	13.1987	13.0551	9.87127	12.4763	NaN	12.9636	13.175	12.7527	11.0387	NaN	NaN	NaN	NaN	10.8638	NaN
P09496	CLTA	Clathrin light chain A	Ex	0.0045511	2.34188	0.00580659	-0.156187	-3.03212		+	3.75582e-07	6.4253	0	-0.172856	-5.81583		+	1.76667e-13	12.7528	0	0.613507	8.56723	+	+	0.989177	0.00472578	0.994073	-0.000847014	-0.0135945			17.8486	18.1186	17.0988	17.0422	16.7406	17.0286	17.4593	17.0286	17.1846	16.9695	16.6845	17.5735	17.152	17.4219	17.4091	17.3915	17.1377	16.9512
Q9NQ79	CRTAC1	Cartilage acidic protein 1	Undefined	0.455803	0.341222	0.532354	0.0333827	0.75415			0.00603713	2.21917	0.00521154	0.134531	2.86292		+	2.41428e-13	12.6172	0	0.593933	8.50371	+	+	4.17271e-07	6.37958	1.08992e-05	0.409138	5.37472		+	14.3901	14.2815	14.7728	14.1825	13.5597	14.6953	14.2397	14.1638	14.3415	14.6058	14.741	14.2034	14.8589	14.4055	13.642	14.2015	14.063	14.3619
Q92747	ARPC1A	Actin-related protein 2/3 complex subunit 1A	Undefined	1.71671e-05	4.7653	1.0101e-05	-0.17189	-4.97757		+	2.17815e-05	4.66191	4.48934e-06	-0.141233	-4.6675		+	2.71686e-13	12.5659	0	0.64616	8.47968	+	+	0.196619	0.706374	0.279677	0.102415	1.29891			15.9753	15.968	15.4292	15.1876	15.5439	15.5232	15.5332	15.4489	15.2411	15.4206	15.3127	15.2616	15.6746	15.4831	15.445	15.0887	15.2034	15.5184
Q01130	SRSF2	Serine/arginine-rich splicing factor 2	Undefined	0.442153	0.354427	0.519956	-0.0346242	-0.777387			0.000383888	3.4158	0.000288732	-0.18863	-3.79755		+	6.12929e-13	12.2126	0	0.736467	8.31386	+	+	7.58839e-05	4.11985	0.00023988	0.307504	4.10777		+	15.5945	14.9013	15.5806	15.0536	15.2708	15.0282	14.7786	15.2184	15.0455	15.2997	15.3266	15.3258	15.0343	14.8694	15.0217	14.9414	15.3145	14.9945
Q15599	NHERF2	Na(+)/H(+) exchange regulatory cofactor NHE-RF2	Undefined	0.0180648	1.74317	0.024137	0.177907	2.48075		+	0.0169509	1.77081	0.0158691	0.199905	2.46712		+	7.51914e-13	12.1238	0	0.781553	8.27214	+	+	0.0399535	1.39845	0.0684684	0.233876	2.07822			14.341	13.9628	13.7746	13.2404	13.3726	14.1419	13.6559	13.8124	14.0565	13.8661	14.3973	13.997	13.9322	13.8982	13.1567	13.5346	13.7287	13.1083
Q14019	COTL1	Coactosin-like protein	Undefined	0.022889	1.64037	0.0311373	0.14486	2.38006		+	4.91682e-09	8.30832	0	0.321089	7.00175		+	9.46279e-13	12.024	0	0.629638	8.22517	+	+	1.33718e-09	8.87381	0	0.532358	6.60767		+	15.7	14.9283	15.4763	15.2444	15.4729	15.5347	15.1986	15.2464	15.3032	15.2905	15.4235	14.5525	15.5065	15.442	15.3452	15.2652	15.2948	15.5108
Q8IW45	NAXD	ATP-dependent	Undefined	0.759939	0.119221	0.809694	-0.0165672	-0.307959			0.000584586	3.23315	0.000442177	0.158357	3.663		+	3.18396e-12	11.497	0	0.646293	7.97661	+	+	0.00519211	2.28466	0.0105305	0.266395	2.85035		+	14.4853	14.4622	14.214	14.0219	14.2006	14.2119	14.208	14.2622	14.327	14.2298	14.3555	14.0512	14.5361	14.4024	13.9212	14.1586	14.125	14.4021
Q96BJ3	AIDA	Axin interactor, dorsalization-associated protein	Undefined	0.0400969	1.39689	0.0548914	-0.169103	-2.1492			0.064248	1.19214	0.0665497	-0.242048	-1.89409			6.24668e-12	11.2044	0	0.861956	7.9643	+	+	0.232374	0.633813	0.319849	0.164832	1.20127			11.8006	12.1764	14.7706	13.971	13.2818	12.0395	14.1826	13.4349	14.2505	14	14.3318	14.1535	14.1684	13.9653	12.9072	13.9595	13.9823	14.343
P98160	HSPG2	Basement membrane-specific heparan sulfate proteoglycan core protein	Undefined	0.029248	1.5339	0.0396526	-0.131862	-2.27338		+	2.94626e-08	7.53073	0	-0.20921	-6.51393		+	2.66165e-11	10.5748	0	0.59426	7.53816	+	+	3.43625e-05	4.46391	6.52529e-05	0.301069	4.31495		+	15.1929	15.0533	14.4078	14.7703	14.8499	14.5884	14.2909	14.8084	14.8649	15.5127	15.159	15.1543	14.7261	14.6873	14.6087	14.9285	14.7832	14.7756
Q05682	CALD1	Caldesmon	Undefined	0.460355	0.336908	0.53659	0.0652091	0.746494			3.61139e-05	4.44233	1.71674e-05	0.244673	4.51904		+	3.41923e-11	10.4661	0	0.708832	7.48609	+	+	9.42376e-06	5.02578	3.05344e-05	0.364752	4.64048		+	13.8525	13.655	13.2231	13.1568	13.3956	13.5089	13.1237	13.1008	13.4961	14.0358	13.8438	13.2195	13.4525	13.5699	12.9653	13.6874	13.2093	13.4822
Q9P0L2	MARK1	Serine/threonine-protein kinase MARK1	Neuron	0.00222808	2.65207	0.00297311	-0.257951	-3.30028		+	1.17024e-06	5.93173	0	-0.22639	-5.50028		+	7.29405e-11	10.137	0	0.606733	7.32808	+	+	0.0547461	1.26165	0.0919124	-0.13838	-1.94102			13.666	13.6681	13.4055	13.046	12.7065	13.4676	14.0166	13.1474	13.5758	13.2007	13.3294	13.6169	13.6349	13.4803	13.4621	13.2732	12.9486	13.157
P55042	RRAD	GTP-binding protein RAD	Undefined	0.963764	0.0160295	0.973974	-0.00528383	-0.0464764			0.2056	0.686977	0.217504	-0.403725	-1.30833			3.15466e-10	9.50105	0	0.897406	7.85772	+	+	0.135546	0.867912	0.202214	0.136768	1.51328			13.883	13.6161	13.9511	14.0227	NaN	13.6782	13.6942	NaN	13.9032	14.1155	13.4057	13.2042	13.8812	NaN	NaN	13.8815	13.059	13.9825
P27635	RPL10	60S ribosomal protein L10	Undefined	7.65261e-05	4.11619	8.06452e-05	-0.304511	-4.47901		+	7.71751e-10	9.11252	0	-0.409479	-7.5065		+	3.31096e-10	9.48005	0	0.62133	7.00993	+	+	0.685466	0.164014	0.769742	0.0319467	0.406061			13.4485	12.7443	14.0334	13.4749	13.2641	13.4259	13.3823	13.4056	13.4932	13.5399	13.3524	13.5351	13.4125	13.5137	13.434	13.6985	13.5282	13.7189
Q9NUP9	LIN7C	Protein lin-7 homolog C	Undefined	0.026913	1.57004	0.036346	-0.142426	-2.30988		+	0.616652	0.20996	0.636773	-0.0236611	-0.503624			4.18719e-10	9.37808	0	0.601504	6.96841	+	+	5.92226e-06	5.22751	2.42424e-05	0.442502	4.75609		+	13.7379	13.6838	13.3489	13.3654	13.1812	13.6015	13.5369	13.3244	13.319	13.7371	13.62	12.9997	13.7434	13.6887	13.5259	13.2481	13.2577	14.0281
Q9Y2V2	CARHSP1	Calcium-regulated heat-stable protein 1	Undefined	0.695837	0.157492	0.755859	-0.0295879	-0.394184			0.666963	0.175898	0.687008	-0.0179816	-0.432782			4.35295e-10	9.36122	0	0.638831	6.95196	+	+	0.0001576	3.80245	0.000401651	0.336442	3.91046		+	15.2273	15.1583	15.341	14.835	14.4497	15.3847	15.0194	14.9698	14.7575	14.8022	15.3928	15.44	14.7732	14.7667	14.3342	14.2048	14.8109	15.0275
P48730	CSNK1D	Casein kinase I isoform delta	Undefined	0.000697478	3.15647	0.000988235	0.231171	3.7192		+	2.24667e-07	6.64846	0	0.310716	5.95754		+	2.72497e-09	8.56464	0	0.612762	6.55943	+	+	0.000483411	3.31568	0.00109813	0.307305	3.59426		+	15.1207	14.672	14.5765	14.328	14.184	14.7311	14.2874	14.2508	14.5405	14.4206	14.8564	14.6051	14.8073	14.802	14.3346	14.4808	14.1357	14.6986
O43674	NDUFB5	NADH dehydrogenase	Undefined	0.000419488	3.37728	0.000674016	-0.287863	-3.89752		+	0.00308356	2.51095	0.00249084	-0.229455	-3.10431		+	5.33386e-09	8.27296	0	0.68796	6.41376	+	+	0.00529832	2.27586	0.0106811	0.313789	2.84343		+	14.1204	15.5314	14.7249	14.8621	14.5956	15.1267	15.024	14.5141	14.9505	15.2077	14.6424	15.1739	14.8959	14.9211	14.9965	14.1944	14.786	14.7611
Q8N135	LGI4	Leucine-rich repeat LGI family member 4	Ast	0.173066	0.761788	0.223469	-0.161755	-1.39565			0.0577667	1.23832	0.0594778	-0.260895	-1.94305			6.92008e-09	8.15989	1.29032e-05	0.866346	6.49037	+	+	0.000619352	3.20806	0.00134234	0.528933	3.54109		+	11.6871	14.5214	12.9063	12.0237	12.1283	11.4183	12.0548	11.0437	13.2175	12.0404	14.7764	13.8605	13.9715	13.9177	12.8209	13.9046	13.7172	13.7696
Q9UII2	ATP5IF1	ATPase inhibitor, mitochondrial	Undefined	0.769363	0.113869	0.81762	0.0291204	0.295494			0.351193	0.454454	0.370242	0.0394258	0.94073			9.19071e-09	8.03665	1.24224e-05	0.674714	6.29487	+	+	0.000726126	3.13899	0.00163776	0.238338	3.47474		+	15.6508	15.9479	15.6087	15.0926	15.0737	15.436	15.4772	15.2365	15.5014	15.3665	15.5672	15.5453	15.3621	15.4037	15.4748	15.4315	15.3569	15.2962
P63218	GNG5	Guanine nucleotide-binding protein G(I)/G(S)/G(O) subunit gamma-5	Undefined	0.0664332	1.17761	0.0893675	0.199989	1.89459			0.00252969	2.59693	0.00200299	0.186087	3.17347		+	9.48296e-09	8.02306	1.23457e-05	0.68179	6.28801	+	+	0.0143019	1.84461	0.0266504	0.232796	2.48809		+	15.6965	15.1934	14.9263	15.6005	15.6625	15.6163	15.4206	15.3223	15.37	16.1013	15.6026	15.4072	15.2857	14.7712	15.3612	14.7041	14.8467	15.4918
P39687	ANP32A	Acidic leucine-rich nuclear phosphoprotein 32 family member A	Undefined	0.565742	0.247381	0.641935	0.0663871	0.580351			0.0529155	1.27642	0.0542293	0.295438	1.98079			9.61413e-09	8.01709	1.22699e-05	0.704995	6.3041	+	+	0.18007	0.744559	0.259789	0.194147	1.34896			11.6201	9.98158	10.194	14.5139	14.4872	14.5671	14.8784	14.3746	14.7623	14.4559	15.345	14.7979	14.6326	14.9624	14.7185	14.912	15.1584	15.0629
O75880	SCO1	Protein SCO1 homolog, mitochondrial	Undefined	0.0574242	1.24091	0.0776786	0.14084	1.96472			3.20618e-05	4.49401	8.70511e-06	0.252229	4.55414		+	1.10795e-08	7.95548	1.21212e-05	0.605941	6.25385	+	+	0.104139	0.982388	0.161279	0.157206	1.63831			15.6838	15.3405	14.9984	14.7719	14.7308	15.0502	14.9734	15.208	15.4783	15.5982	15.7065	15.7457	15.2325	15.545	15.2183	15.5249	15.3459	15.4242
Q15836	VAMP3	Vesicle-associated membrane protein 3	Undefined	0.00819543	2.08643	0.010723	0.291764	2.80322		+	9.41309e-08	7.02627	0	0.308569	6.19642		+	1.25905e-08	7.89996	1.18343e-05	0.77588	6.22572	+	+	0.0097216	2.01226	0.0187753	0.271046	2.63025		+	14.7211	13.7354	13.8098	14.298	13.4759	14.4193	14.1842	14.1106	13.8344	14.1375	14.2353	13.991	13.8054	14.0428	13.897	13.6769	13.6575	13.5811
O60234	GMFG	Glia maturation factor gamma	Undefined	0.606683	0.217038	0.678866	-0.0419918	-0.519499			0.813914	0.0894215	0.834621	-0.0136202	-0.236578			1.55812e-08	7.8074	1.15607e-05	0.770583	6.17874	+	+	3.25708e-07	6.48717	1.15607e-05	0.500103	5.43064		+	16.0802	15.9335	16.0338	15.9446	15.6124	16.2189	15.9362	15.6184	15.6215	15.9415	16.2828	15.6767	16.1492	15.918	15.6713	15.966	15.7133	15.7115
Q7LBR1	CHMP1B	Charged multivesicular body protein 1b	Undefined	4.25813e-05	4.37078	4.44444e-05	0.440315	4.67551		+	0.00472439	2.32565	0.00399718	0.358569	2.96963		+	1.94946e-08	7.71009	1.09589e-05	0.777113	6.20882	+	+	0.0338116	1.47093	0.0587235	0.27188	2.15316			12.7202	11.9574	11.2979	10.8526	NaN	12.4127	12.4817	11.5798	12.7237	12.6053	12.5402	11.6839	12.9049	12.674	12.4779	12.2309	12.5513	12.1847
O00555	CACNA1A	Voltage-dependent P/Q-type calcium channel subunit alpha-1A	Neuron	0.665043	0.17715	0.729576	-0.067268	-0.437275			0.365805	0.43675	0.38506	0.187097	0.914748			2.86646e-08	7.54265	1.0582e-05	1.48449	6.09887	+	+	0.568713	0.245107	0.671813	-0.126658	-0.571841			11.013	10.2242	12.2588	12.696	11.822	9.46638	9.89606	10.8653	10.6837	12.8974	12.4239	10.3717	10.2717	10.9343	12.4321	12.1429	11.6802	11.7835
Q7Z2K6	ERMP1	Endoplasmic reticulum metallopeptidase 1	Undefined	0.681195	0.166728	0.743403	-0.0539212	-0.416604			0.391934	0.406787	0.410796	-0.064821	-0.868651			4.71304e-08	7.3267	1.02041e-05	0.757678	6.11445	+	+	0.00417986	2.37884	0.00862543	0.338824	2.94781		+	13.9226	13.3365	13.227	12.9857	12.6627	12.7992	12.5355	12.8379	12.6302	13.1248	12.6366	NaN	12.1854	12.0847	NaN	12.2396	12.0617	12.9044
Q9NZJ7	MTCH1	Mitochondrial carrier homolog 1	Undefined	0.73183	0.13559	0.788301	-0.0201976	-0.345442			0.00713364	2.14669	0.00630738	-0.148063	-2.80118		+	1.34102e-07	6.87256	8.90869e-06	0.673135	5.69571	+	+	0.140964	0.850892	0.209378	0.175747	1.4826			15.8465	15.7125	15.3502	15.3119	15.1039	15.011	15.4197	15.3758	15.1833	15.3749	15.1354	15.8221	15.5813	15.1379	15.1789	15.3177	15.3401	15.1898
P49257	LMAN1	Protein ERGIC-53	Undefined	0.180834	0.742719	0.233669	0.146782	1.36542			0.0591921	1.22774	0.061154	0.15368	1.92989			3.67716e-07	6.43449	2.40481e-05	0.587371	5.46321	+	+	7.1714e-05	4.1444	0.000223228	0.495276	4.12277		+	13.8929	14.114	13.978	14.2162	14.9708	14.3638	14.0902	14.467	14.1519	14.4644	14.2414	14.3064	14.1727	14.5815	14.276	14.4038	14.0043	14.2727
Q9Y2Z9	COQ6	Ubiquinone biosynthesis monooxygenase COQ6, mitochondrial	Undefined	0.00071555	3.14536	0.00101022	0.282818	3.73172		+	0.705343	0.151599	0.726754	-0.0387434	-0.380831			4.09663e-07	6.38757	2.38095e-05	0.747001	5.48451	+	+	0.0975867	1.01061	0.152606	-0.204522	-1.67265			12.6439	12.6032	NaN	12.1236	11.8459	12.1037	12.3315	11.8635	11.6028	12.0366	11.7672	12.3217	12.0569	12.1392	12.6163	11.9923	12.1192	11.5492
P00488	F13A1	Coagulation factor XIII A chain	Undefined	0.0061397	2.21185	0.00770401	0.432109	3.01703		+	0.180496	0.743533	0.191822	0.127241	1.36366			4.30591e-07	6.36594	3.15582e-05	1.06764	5.63978	+	+	0.335486	0.474325	0.436156	0.161468	0.969267			12.0878	12.3834	12.7119	11.6053	12.1271	NaN	12.3247	11.367	10.462	10.5722	10.5942	NaN	12.0543	11.6725	12.3445	12.178	11.4432	10.7412
P16144	ITGB4	Integrin beta-4	Undefined	0.0751246	1.12422	0.100699	-0.180508	-1.83594			0.504869	0.296821	0.522046	0.0270657	0.671601			6.50957e-07	6.18645	9.86717e-05	0.598887	5.34163	+	+	0.0173286	1.76124	0.0316546	0.187995	2.41589		+	13.9822	14.7849	13.2561	14.6324	14.3973	14.7916	14.6791	14.7239	14.5034	14.7846	14.5959	14.859	14.661	14.6475	14.728	14.4628	14.4597	14.4353
P35749	MYH11	Myosin-11	Undefined	0.312866	0.504642	0.381784	-0.126998	-1.02399			0.429701	0.366833	0.449426	-0.271711	-0.796887			9.52508e-07	6.02113	0.000145455	0.744966	5.27221	+	+	0.0205648	1.68687	0.0374005	0.507408	2.35367		+	7.77688	10.3664	16.261	14.4979	13.5907	14.2189	14.6495	12.7432	12.6987	12.7987	13.3413	13.1413	12.5869	12.1605	12.5328	12.6197	12.3699	12.7757
Q5T447	HECTD3	E3 ubiquitin-protein ligase HECTD3	Undefined	0.0510742	1.2918	0.0688818	-0.39975	-2.02014			0.0162343	1.78957	0.0151572	-0.22482	-2.49744		+	1.0979e-06	5.95944	0.000171123	0.74255	5.21707	+	+	0.131281	0.881798	0.196786	0.220261	1.52072			15.2443	15.2549	15.1294	14.8098	14.8396	16.3632	16.4648	16.2207	16.4046	16.8053	16.7537	16.8874	16.911	16.4313	NaN	16.8447	16.5412	16.7015
Q6NXE6	ARMC6	Armadillo repeat-containing protein 6	Undefined	0.27832	0.555455	0.345419	-0.130221	-1.10227			0.34817	0.458208	0.366794	0.0763278	0.947619			1.6459e-06	5.7836	0.000216216	0.695296	5.1159	+	+	0.0330004	1.48148	0.0575284	0.32288	2.16005			14.7758	14.803	14.8724	14.8782	17.467	16.9166	17.1937	17.5813	16.979	16.9927	17.5327	17.1971	16.8696	17.1862	16.8456	17.2851	16.6647	17.4667
P19823	ITIH2	Inter-alpha-trypsin inhibitor heavy chain H2	Undefined	8.17246e-06	5.08765	0	0.505398	5.33692		+	2.58146e-05	4.58814	4.41989e-06	0.567251	4.71235		+	1.07122e-05	4.97012	0.000690808	1.07339	4.73411	+	+	0.0218139	1.66127	0.0394016	0.478627	2.3371		+	12.1967	11.8195	12.1985	12.1347	11.5292	NaN	12.7766	11.9762	11.1647	11.9005	11.4688	11.4415	12.0252	12.2075	9.32131	11.0162	11.852	11.8178
Q92623	TTC9	Tetratricopeptide repeat protein 9A	Undefined	0.0235526	1.62796	0.0320487	-0.17235	-2.36776		+	0.183383	0.73664	0.194725	-0.164193	-1.3491			1.6925e-05	4.77147	0.00105013	0.61681	4.53068	+	+	0.0316266	1.49995	0.0554139	-0.363293	-2.17614			13.7737	11.119	12.9098	12.9073	12.5888	13.4178	13.4153	13.1207	13.2749	13.0014	12.8865	13.7684	13.3024	13.1522	13.5474	12.371	13.2683	12.8665
P29144	TPP2	Tripeptidyl-peptidase 2	Undefined	0.101042	0.995498	0.133719	-0.175729	-1.6842			0.356161	0.448354	0.375573	-0.0730813	-0.931502			2.41689e-05	4.61674	0.00136709	0.753921	4.4411	+	+	0.11579	0.936331	0.176972	0.214861	1.5851			12.4236	12.7528	12.1287	12.5346	12.7595	12.8959	13.1568	12.8702	12.5544	13.2411	12.2119	12.3853	13.2866	12.7927	12.6086	12.9573	12.4676	12.9574
P09012	SNRPA	U1 small nuclear ribonucleoprotein A	Undefined	0.587118	0.231275	0.662886	0.106647	0.553515			0.0721869	1.14154	0.0760421	0.641829	1.89827			2.43957e-05	4.61269	0.00136536	0.855925	4.53085	+	+	0.127083	0.895913	0.191767	-0.365129	-1.54237			11.7656	12.6085	13.094	NaN	NaN	10.7311	11.2787	11.7676	12.9339	11.1583	9.40709	10.6561	11.0901	11.5067	11.9974	12.5061	11.0569	9.99047
Q9UMS4	PRPF19	Pre-mRNA-processing factor 19	Undefined	0.00319169	2.49598	0.00416073	-0.312134	-3.16653		+	0.000437905	3.35862	0.000318891	-0.196308	-3.75568		+	3.10823e-05	4.50749	0.00167931	0.613208	4.37312	+	+	0.521852	0.282453	0.626251	0.0781796	0.642497			13.731	14.4216	14.4223	13.7169	13.8835	14.1129	14.2284	14.4214	14.0859	14.348	14.4956	14.2244	14.0649	13.4054	13.8526	13.6154	14.1043	13.8898
P17600-2	SYN1	Synapsin-1	Ex	0.986964	0.00569883	0.989816	-0.00263434	-0.0164565			0.84448	0.0734105	0.863348	0.0218868	0.19723			3.53595e-05	4.45149	0.00186988	0.799098	4.34151	+	+	0.964993	0.0154756	0.979821	0.00699435	0.0439884			13.5626	13.9424	13.712	14.8413	13.8558	14.2288	14.9035	13.9036	13.5336	14.4764	13.9519	14.0887	14.2209	13.8582	14.4838	14.1348	13.4463	13.8547
Q9BYK8	HELZ2	Helicase with zinc finger domain 2	Undefined	1	0	0.985868	0.473384	0			1	0	1	NaN	0			5.01168e-05	4.30002	0.00246296	1.37095	5.75143	+	+	0.587509	0.230986	0.688896	0.145986	0.554351			NaN	14.3959	NaN	NaN	NaN	NaN	NaN	NaN	NaN	NaN	NaN	NaN	14.1697	NaN	NaN	NaN	NaN	NaN
P61513	RPL37A	60S ribosomal protein L37a	Neuron	0.954362	0.0202867	0.966968	0.0119589	0.0581331			0.526292	0.278773	0.544351	0.262305	0.760688			5.03273e-05	4.2982	0.00246936	1.06196	4.75338	+	+	0.829041	0.0814242	0.885086	0.0826801	0.219283			NaN	NaN	NaN	NaN	NaN	NaN	10.9061	NaN	NaN	NaN	NaN	NaN	NaN	NaN	11.5287	NaN	NaN	11.1939
Q6UB35	MTHFD1L	Monofunctional C1-tetrahydrofolate synthase, mitochondrial	Undefined	0.800235	0.0967827	0.843102	0.0463215	0.255753			0.54989	0.259725	0.568683	0.220137	0.60772			6.20146e-05	4.20751	0.00288414	1.2568	4.38169	+	+	0.747507	0.126384	0.822062	-0.117167	-0.323642			13.4295	12.8341	8.35181	10.465	NaN	10.2347	11.389	10.5023	NaN	13.1684	10.1644	10.8229	12.5557	11.5494	11.2715	10.9239	10.3669	11.8746
Q15904	ATP6AP1	V-type proton ATPase subunit S1	Undefined	0.0125075	1.90283	0.0167193	-0.262822	-2.63316		+	0.179847	0.745097	0.191225	0.135103	1.35989			6.9618e-05	4.15728	0.00317869	0.805167	4.15881	+	+	0.380943	0.41914	0.483296	0.156151	0.87963			12.4417	13.3388	14.7826	14.51	14.5169	15.0835	14.8613	14.479	14.7677	14.21	14.5517	14.4183	15.0509	15.0741	15.2858	15.3035	14.2216	15.0796
P02647	APOA1	Apolipoprotein A-I	Undefined	0.0419773	1.37699	0.0575598	0.219013	2.11111			1.98559e-05	4.70211	4.53001e-06	0.331517	4.69451		+	0.000101493	3.99357	0.00440592	0.604859	4.06006	+	+	0.000590042	3.22912	0.00130909	0.428366	3.5379		+	13.414	13.1796	14.5051	13.6898	13.8427	13.0196	13.824	13.7701	13.9509	13.9193	12.4768	13.5859	13.5568	14.0925	12.8492	12.6588	12.9743	12.5519
P02675	FGB	Fibrinogen beta chain	Undefined	0.0993673	1.00276	0.131636	-0.134461	-1.69286			0.0116415	1.93399	0.0105958	-0.163455	-2.61522		+	0.000165278	3.78179	0.00635743	0.620814	3.92133	+	+	0.00663481	2.17817	0.0132113	0.376056	2.76578		+	14.8535	15.9827	15.2884	15.8078	15.0881	16.4475	15.0188	15.0813	15.095	14.4174	15.3298	13.6593	15.4518	15.4969	14.9663	16.1588	14.9208	14.2681
Q9BWS9	CHID1	Chitinase domain-containing protein 1	Undefined	0.236387	0.626376	0.300139	-0.144383	-1.20474			0.98343	0.00725644	0.985969	-0.00703764	-0.0208957			0.000170775	3.76758	0.00652547	0.76457	3.92092	+	+	0.932573	0.0303172	0.95952	-0.0281247	-0.0848216			0.967272	13.7555	12.8822	12.9047	9.419	13.6281	13.8171	12.9556	9.89914	12.7142	12.6424	12.8678	12.8742	12.4376	11.8144	11.8038	12.4492	12.6373
Q14210	LY6D	Lymphocyte antigen 6D	Undefined	0.357914	0.446222	0.431535	0.571103	1.08345			0.077979	1.10802	0.082682	-0.789436	-2.63516			0.00028813	3.54041	0.00946916	3.00941	4.16175	+	+	0.748737	0.125671	0.822501	0.236044	0.324173			NaN	NaN	NaN	NaN	13.472	11.3775	NaN	13.5421	NaN	NaN	NaN	NaN	NaN	12.1328	12.6959	NaN	NaN	NaN
Q9Y653	ADGRG1	Adhesion G-protein coupled receptor G1	Undefined	0.00114853	2.93986	0.00153351	0.398336	3.62123		+	0.0193227	1.71393	0.0180609	0.255441	2.43764		+	0.000335161	3.47475	0.0106313	0.721048	3.79391	+	+	0.0741585	1.12984	0.120221	0.311026	1.81162			11.5186	12.9238	12.0255	11.8455	12.2736	12.0348	11.4227	11.2122	12.4689	12.2346	12.603	13.0092	11.7419	12.2179	12.2613	11.9371	12.2238	12.1318
Q9UEW8	STK39	STE20/SPS1-related proline-alanine-rich protein kinase	Undefined	0.134289	0.871961	0.176978	-0.394026	-1.54375			0.151604	0.81929	0.161612	-1.11725	-1.47137			0.000410623	3.38656	0.0121973	1.09422	3.70577	+	+	0.539985	0.267619	0.643893	-0.297151	-0.615384			13.2023	12.9437	9.77755	NaN	NaN	12.8773	12.7349	11.9294	11.6992	6.79713	7.09614	1.10275	12.375	12.1196	12.4895	7.35405	1.45382	7.83299
P00738	HP	Haptoglobin	Undefined	0.435802	0.360711	0.513448	-0.0702746	-0.788346			0.149016	0.826766	0.158887	-0.124306	-1.46472			0.000721045	3.14204	0.0179865	0.653158	3.49422	+	+	0.0225033	1.64775	0.0404292	0.365463	2.31351		+	14.0821	14.9922	14.6817	14.6569	14.3912	15.1459	14.4441	13.6335	14.6898	13.1061	13.475	13.2593	14.9646	14.7873	14.2118	15.2516	13.8502	13.8388
P20290	BTF3	Transcription factor BTF3	Undefined	0.145894	0.835962	0.191438	-0.237481	-1.49295			0.940085	0.0268328	0.948558	0.026271	0.0756617			0.00257335	2.5895	0.0416759	0.807086	3.10651	+	+	0.876404	0.0572956	0.917226	0.0428742	0.155958			10.6255	9.66427	15.4759	13.7374	13.6126	15.4814	12.1816	12.4779	14.6695	9.36605	15.0577	11.1474	11.2661	13.0517	12.3228	NaN	13.0682	13.1219
O15078	CEP290	Centrosomal protein of 290 kDa	Undefined	0.12641	0.898217	0.166473	-0.39948	-1.57534			0.510451	0.292046	0.527738	0.238552	0.66423			0.00266307	2.57462	0.0424575	1.47467	3.10106	+	+	0.596229	0.224587	0.695094	0.226576	0.531721			NaN	12.3201	NaN	13.0166	12.2806	11.0014	11.6193	12.3011	12.3908	11.6702	10.7326	12.1707	11.2015	NaN	10.8597	8.14039	12.1595	11.326
Q8IW75	SERPINA12	Serpin A12	Undefined	0.238938	0.621715	0.302708	-0.384603	-1.33662			0.528112	0.277274	0.545967	-0.158729	-0.638574			0.00281859	2.54997	0.0438991	0.765808	3.16868	+	+	0.0721601	1.1417	0.117571	0.407043	1.82696			15.7227	NaN	NaN	14.0413	14.0883	12.7036	12.3961	13.5901	NaN	12.5566	NaN	12.34	12.2244	11.3117	13.1681	12.773	12.3894	NaN
Q9NXU5	ARL15	ADP-ribosylation factor-like protein 15	Undefined	0.00929215	2.03188	0.0121739	-0.342748	-2.75323		+	3.34302e-08	7.47586	0	-0.38715	-6.50088		+	6.27046e-21	20.2027	0	-1.33858	-12.091	+	+	0.53389	0.272549	0.637615	-0.0493962	-0.624011			11.2138	12.0679	12.6475	12.7321	13.0876	12.8812	12.602	12.3022	13.2264	12.4102	12.8031	12.7988	13.041	13.0602	13.0385	12.7443	12.5165	12.428
P51784	USP11	Ubiquitin carboxyl-terminal hydrolase 11	Neuron	0.00892952	2.04917	0.0116774	-0.216002	-2.77392		+	3.14004e-05	4.50306	8.7146e-06	-0.245976	-4.58669		+	4.54271e-19	18.3427	0	-0.823389	-11.1761	+	+	0.00107838	2.96723	0.00242813	-0.230082	-3.3558		+	12.7411	12.8137	12.0169	12.8225	13.0157	12.5088	12.9982	13.0346	12.6993	12.8403	13.1529	13.2812	12.4892	13.2644	13.1458	12.8265	12.6955	12.6564
Q9H9A6	LRRC40	Leucine-rich repeat-containing protein 40	Undefined	0.376389	0.424364	0.450849	0.0542338	0.895973			0.0138862	1.85742	0.0127661	-0.0824105	-2.54636		+	1.30478e-18	17.8845	0	-0.97215	-10.9608	+	+	0.829135	0.0813746	0.884891	0.0146184	0.216311			13.3972	13.2499	13.3482	13.6576	13.6964	13.5052	13.264	13.5663	13.4111	13.1876	13.669	13.222	13.3275	13.2349	12.8494	13.1297	13.4736	13.2312
Q99418	CYTH2	Cytohesin-2	Undefined	0.131581	0.880805	0.173268	-0.109422	-1.54401			0.000691141	3.16043	0.000507563	-0.155618	-3.61324		+	3.51718e-18	17.4538	0	-0.858064	-10.759	+	+	0.0254061	1.59506	0.0450653	-0.172541	-2.2652		+	12.9332	13.7782	13.844	14.2604	13.6342	13.7236	14.1352	13.7085	14.0321	13.5048	13.7308	13.8426	13.7661	13.5767	13.6203	13.3588	13.6693	13.3621
Q8N9R8	SCAI	Protein SCAI	Neuron	2.76068e-06	5.55898	0	-0.331823	-5.58037		+	2.18552e-06	5.66045	0	-0.247122	-5.32529		+	3.57661e-18	17.4465	0	-0.677726	-10.7556	+	+	1.44641e-10	9.83971	0	-0.365985	-7.05859		+	13.751	13.9969	13.2901	13.4644	13.7674	13.5486	13.6579	13.5463	13.9035	13.1672	13.3727	13.7346	13.5048	13.6036	13.5342	13.4985	13.6713	13.5627
P39656	DDOST	Dolichyl-diphosphooligosaccharide--protein glycosyltransferase 48 kDa subunit	Undefined	0.928631	0.0321567	0.946418	-0.00780442	-0.0902143			0.251378	0.599673	0.264872	-0.0481765	-1.15992			5.82217e-18	17.2349	0	-0.952679	-10.6565	+	+	0.115645	0.936872	0.176813	0.110644	1.58551			12.7391	13.1119	12.5836	13.2106	13.3769	12.7856	12.6769	13.2535	12.8372	13.0973	12.8426	12.9282	12.8011	12.9077	13.0068	12.6486	12.8872	13.1009
O95870	ABHD16A	Phosphatidylserine lipase ABHD16A	Undefined	0.0544123	1.2643	0.0732741	-0.45444	-1.99234			0.0442717	1.35387	0.0448543	-0.118796	-2.06149		+	7.82584e-18	17.1065	0	-0.903606	-10.5965	+	+	0.217535	0.662471	0.303956	-0.0903191	-1.24002			11.5143	12.3274	11.6	11.872	11.9787	11.9565	11.7074	11.5411	12.1446	11.74	11.8692	12.1522	11.9879	11.8197	11.5715	11.5921	11.5445	11.9682
P51665	PSMD7	26S proteasome non-ATPase regulatory subunit 7	Undefined	0.283517	0.547421	0.351286	0.10045	1.08918			0.964682	0.0156159	0.969644	-0.00302873	-0.0444931			2.57122e-17	16.5899	0	-1.07492	-10.3552	+	+	0.189833	0.721628	0.272117	-0.12105	-1.31901			14.2494	15.2324	15.4145	14.8207	15.0804	15.2736	15.2072	15.11	15.2105	15.2272	15.7492	14.8225	15.2879	15.3553	15.2148	15.9573	15.2485	15.3726
Q6ZWB6	KCTD8	BTB/POZ domain-containing protein KCTD8	Ex	0.00291716	2.53504	0.00385981	-0.539257	-3.21475		+	1.80007e-07	6.74471	0	-0.351812	-6.01851		+	5.11963e-17	16.2908	0	-1.122	-10.2158	+	+	0.0017395	2.75957	0.00379884	0.247283	3.20797		+	11.6185	11.3012	12.2383	12.2568	11.8497	11.8612	11.6317	11.9344	11.6739	11.7416	12.178	11.8853	11.5624	11.8608	11.2003	11.7091	11.1747	11.7692
Q14694	USP10	Ubiquitin carboxyl-terminal hydrolase 10	Undefined	0.600722	0.221326	0.673673	0.0451683	0.528452			2.11912e-05	4.67384	4.49944e-06	-0.218958	-4.68454		+	1.33043e-16	15.876	0	-0.8451	-10.044	+	+	0.237394	0.624531	0.324765	-0.105875	-1.18782			12.4348	11.2023	13.2604	13.014	13.386	12.3076	12.5651	13.1992	12.9878	12.8559	12.8673	12.9178	12.6082	12.4528	13.2649	12.4887	12.8394	12.0979
P16389	KCNA2	Potassium voltage-gated channel subfamily A member 2	Undefined	0.00180377	2.74382	0.00236704	-0.47519	-3.3779		+	3.07241e-20	19.5125	0	-0.569097	-14.7645		+	1.58674e-16	15.7995	0	-0.940548	-9.9869	+	+	0.336046	0.473601	0.436476	-0.0585605	-0.966123			13.3553	13.1377	12.6696	13.0237	12.8059	13.1327	13.1171	13.3086	12.7326	13.124	12.8819	13.6096	13.4747	13.584	13.4654	13.1155	13.4406	12.7594
Q8IUR7-6	ARMC8	Armadillo repeat-containing protein 8	Undefined	0.792681	0.100902	0.837337	0.0404515	0.265549			0.0199526	1.7	0.0187574	-0.161222	-2.40424		+	1.17321e-15	14.9306	0	-1.17686	-9.77339	+	+	0.0108701	1.96377	0.0205966	0.216255	2.5913		+	11.1936	11.2767	10.8686	11.8356	11.8904	11.2668	11.2331	11.7604	11.6217	11.17	11.1758	11.7463	11.8296	11.5339	11.1041	11.311	11.0854	11.399
Q96ME1	FBXL18	F-box/LRR-repeat protein 18	Undefined	0.312933	0.504549	0.381717	-0.156534	-1.03661			0.487909	0.311661	0.506637	-0.134804	-0.700838			3.20968e-15	14.4935	0	-1.51631	-9.5824	+	+	0.000260164	3.58475	0.000632391	-0.576835	-3.78189		+	11.3427	11.3262	13.4144	NaN	11.1654	11.1926	11.2979	11.3765	12.44	11.0178	11.7394	11.3236	11.0098	10.8513	11.1062	11.8686	14.9272	11.5106
Q96EY1	DNAJA3	DnaJ homolog subfamily A member 3, mitochondrial	Undefined	0.901031	0.0452601	0.92549	-0.0104911	-0.125264			0.00313198	2.50418	0.00253402	-0.184816	-3.09883		+	3.6366e-15	14.4393	0	-0.703079	-9.35393	+	+	0.831071	0.0803618	0.886669	-0.0135965	-0.213822			13.0338	13.5509	12.635	13.1201	13.8588	13.0925	13.0605	13.0661	13.2771	12.8663	13.139	13.1307	13.0908	13.1931	13.3539	13.3061	12.7539	12.7829
O15173	PGRMC2	Membrane-associated progesterone receptor component 2	Undefined	7.04644e-06	5.15203	0	-0.385631	-5.27177		+	4.9471e-10	9.30565	0	-0.267607	-7.62799		+	5.2715e-15	14.2781	0	-0.715316	-9.27888	+	+	0.296254	0.528336	0.391791	0.0667849	1.04936			13.9117	14.0672	13.7602	14.1656	14.0254	13.8334	13.7884	13.7395	13.874	14.0482	13.974	14.0893	14.0363	13.9892	13.8425	13.6335	13.8354	14.0809
O60524	NEMF	Ribosome quality control complex subunit NEMF	Undefined	0.544331	0.264137	0.621214	0.0654838	0.614664			0.138801	0.857606	0.148244	-0.157543	-1.50894			8.04612e-15	14.0944	0	-0.87651	-9.30318	+	+	0.0484544	1.31467	0.0822912	-0.230473	-1.9964			10.4198	11.3486	12.1721	11.9446	11.7621	11.744	11.8297	12.0954	12.0748	12.1473	12.0935	12.061	12.1171	12.7192	12.6389	12.2761	NaN	13.0701
O75348	ATP6V1G1	V-type proton ATPase subunit G 1	Undefined	0.586652	0.231619	0.662527	0.0431	0.548763			0.226252	0.645407	0.239045	0.0517655	1.22458			9.54091e-15	14.0204	0	-0.698778	-9.15891	+	+	0.311914	0.505964	0.409127	0.0656369	1.01576			13.9553	13.6816	13.5876	14.1275	14.6643	13.6227	13.7378	14.2815	14.207	13.9266	14.0354	14.1162	13.9378	14.1314	13.9869	14.0698	14.2249	13.6466
P61966	AP1S1	AP-1 complex subunit sigma-1A	Undefined	0.168847	0.772506	0.218795	-0.219373	-1.40496			0.00148551	2.82812	0.00113219	-0.225255	-3.35558		+	1.4628e-14	13.8348	0	-1.00883	-9.07244	+	+	0.23664	0.625912	0.324354	0.111752	1.18975			12.0731	12.6183	12.6684	12.055	12.2149	12.6057	12.3183	11.7414	12.529	11.8412	12.3839	12.3528	12.4745	12.1118	11.8693	12.2286	11.9185	12.3147
P47736-2	RAP1GAP	Rap1 GTPase-activating protein 1	Undefined	0.235366	0.628256	0.299216	0.074824	1.20742			0.388497	0.410612	0.407209	-0.0334061	-0.869634			1.71867e-14	13.7648	0	-0.714073	-9.03982	+	+	0.66362	0.17808	0.750215	-0.027115	-0.436067			12.8598	12.8145	13.709	13.0566	12.9869	13.2869	12.962	13.0289	13.1532	12.7292	13.1024	12.9178	13.0624	12.7453	13.0917	12.8876	12.9185	12.9422
O14980	XPO1	Exportin-1	Undefined	0.0550336	1.25937	0.0740136	-0.419315	-1.98493			0.442086	0.354493	0.460171	-0.0336716	-0.774597			2.67193e-14	13.5732	0	-0.893339	-8.95048	+	+	0.00190277	2.72061	0.00411787	-0.192255	-3.1797		+	12.0503	12.3241	11.6385	12.2535	12.1879	12.0528	11.9895	11.8573	11.6403	12.0829	11.9062	11.8999	11.8228	11.8049	12.0707	11.7177	11.6597	11.4387
Q8IXI2	RHOT1	Mitochondrial Rho GTPase 1	Undefined	0.0106511	1.97261	0.0141915	-0.290691	-2.6984		+	0.000865503	3.06273	0.000625205	-0.149408	-3.53528		+	5.50068e-14	13.2596	0	-0.698532	-8.80414	+	+	0.364319	0.438518	0.465653	0.0540904	0.910839			14.891	15.0658	14.5342	15.0851	14.8701	14.6748	14.6211	14.7684	14.9932	14.7703	14.6873	14.8987	14.8794	14.6568	14.5643	14.254	14.8105	14.7837
Q9Y6T7	DGKB	Diacylglycerol kinase beta	Neuron	0.000125666	3.90078	0.000120755	-0.373414	-4.31145		+	3.81287e-10	9.41875	0	-0.46253	-7.69922		+	6.43567e-14	13.1914	0	-0.645315	-8.7723	+	+	3.19152e-11	10.496	0	-0.468698	-7.35915		+	11.5628	11.7665	11.4746	11.4576	12.0695	11.8891	11.9072	11.2758	11.7266	11.3875	11.5557	11.7009	11.5789	11.2661	11.2382	11.0285	11.6887	10.9872
Q9BRX8	PRXL2A	Peroxiredoxin-like 2A	Undefined	0.122212	0.912885	0.161164	-0.337272	-1.58628			0.504039	0.297536	0.521629	-0.0514627	-0.672824			1.33894e-13	12.8732	0	-0.852324	-8.63813	+	+	0.0678825	1.16824	0.111079	-0.136975	-1.84346			10.5092	11.8328	12.0239	11.9499	12.3003	11.6737	11.845	12.5879	12.4239	12.021	11.8563	11.5788	11.7785	12.1564	12.5616	11.9793	11.8475	12.0386
Q96KP1	EXOC2	Exocyst complex component 2	Undefined	0.279754	0.553223	0.346701	-0.174461	-1.09788			0.523811	0.280825	0.541764	-0.0609968	-0.641817			1.5485e-13	12.8101	0	-0.89577	-8.59403	+	+	0.0640946	1.19318	0.105738	0.152362	1.86984			12.1019	11.9865	11.7744	12.8133	12.3898	12.6131	12.4362	12.2503	12.7988	11.9886	12.2981	11.9305	12.3847	12.2066	12.2073	11.3506	12.0019	12.4045
Q07817	BCL2L1	Bcl-2-like protein 1	Undefined	0.0142923	1.8449	0.0190676	0.33052	2.59108		+	0.378751	0.421646	0.396764	0.0766559	0.888409			1.8298e-13	12.7376	0	-1.15574	-8.60396	+	+	0.0107375	1.9691	0.0204251	0.249357	2.59496		+	10.5951	11.0247	10.7752	11.6489	12.0868	11.9241	11.7966	11.8187	11.3923	11.5312	11.61	11.6453	11.8091	11.8105	11.5941	10.8658	10.9249	10.6018
P43007	SLC1A4	Neutral amino acid transporter A	Undefined	0.135767	0.867207	0.178918	-0.0839694	-1.52799			0.944886	0.0246205	0.952293	0.00288513	0.0694646			3.04127e-13	12.5169	0	-0.659078	-8.47054	+	+	0.000492632	3.30748	0.00113419	-0.273167	-3.58877		+	13.912	14.3459	13.9557	14.0502	13.9883	13.8156	13.7484	13.9873	13.9956	13.8966	14.0741	13.6428	13.4835	13.6672	13.6913	13.6958	14.1289	13.8401
O60645	EXOC3	Exocyst complex component 3	Undefined	0.059898	1.22259	0.0808167	-0.28729	-1.94457			0.0184486	1.73404	0.0173007	-0.191365	-2.44334		+	3.89394e-13	12.4096	0	-1.10867	-8.41998	+	+	0.526521	0.278584	0.630958	0.0593463	0.635366			13.1043	13.0475	11.6439	11.3007	12.9688	11.6582	11.6986	12.0897	12.9924	12.3786	12.4433	11.8976	12.2795	11.6426	12.2115	12.7717	12.3046	12.6316
Q9NR31	SAR1A	GTP-binding protein SAR1a	Undefined	0.0431181	1.36534	0.0589254	-0.404021	-2.0988			1.26556e-05	4.89772	4.72813e-06	-0.259692	-4.82519		+	4.57613e-13	12.3395	0	-0.835589	-8.37347	+	+	0.0731726	1.13565	0.119093	-0.142982	-1.8086			13.1433	14.1926	13.1551	13.9929	13.7799	13.2405	13.5356	14.1658	13.8666	14.3676	13.2015	13.5051	13.2857	13.4428	13.6414	13.6827	13.8664	13.4213
B5ME19	EIF3CL	Eukaryotic translation initiation factor 3 subunit C-like protein	Undefined	0.0665586	1.1768	0.0894524	-0.202346	-1.89367			0.00420237	2.37651	0.0035232	-0.159408	-2.99444		+	7.97161e-13	12.0985	0	-0.930715	-8.26021	+	+	1.36599e-05	4.86455	3.62976e-05	0.428738	4.54855		+	12.2377	11.965	12.243	12.8021	12.5991	12.4018	12.1673	11.9369	12.3759	12.3193	12.5927	12.2724	12.216	12.3336	11.9386	12.0104	12.1877	12.2882
Q96RP9	GFM1	Elongation factor G, mitochondrial	Undefined	0.944414	0.0248374	0.959048	-0.00819504	-0.0702553			0.534409	0.272126	0.551947	-0.0347848	-0.625454			9.73483e-13	12.0117	0	-0.764047	-8.2322	+	+	0.724272	0.140099	0.803525	-0.0287774	-0.353635			12.0782	13.467	13.0758	12.9993	13.5546	12.7963	13.4177	14.0534	13.4962	12.8415	13.1418	12.9588	13.1089	12.7105	13.0883	13.023	13.2143	12.9658
Q13310-2	PABPC4	Polyadenylate-binding protein 4	Undefined	0.0149028	1.82673	0.0198553	-0.149984	-2.56109		+	1.44729e-05	4.83945	4.67836e-06	-0.191831	-4.78638		+	2.12091e-12	11.6735	0	-0.661943	-8.05997	+	+	0.000582365	3.2348	0.00129989	-0.250229	-3.5399		+	12.1607	12.2149	12.436	12.0633	12.1972	12.4053	12.3476	12.1624	12.5626	12.1483	12.2309	12.359	12.28	12.105	12.0121	11.9766	12.299	12.0282
Q2M389	WASHC4	WASH complex subunit 4	Undefined	0.404693	0.392874	0.480287	-0.0708181	-0.843774			0.248652	0.604408	0.262027	-0.0555559	-1.16671			2.73301e-12	11.5634	0	-0.764143	-8.00796	+	+	0.875004	0.0579898	0.91667	0.0116858	0.157662			12.2047	12.7333	12.7011	13.1729	12.9695	13.4153	13.8669	13.5667	13.3451	13.3367	13.1669	12.9697	13.5463	13.2948	13.1768	12.7742	13.4647	13.306
P50150	GNG4	Guanine nucleotide-binding protein G(I)/G(S)/G(O) subunit gamma-4	In	0.000548167	3.26109	0.000802432	-0.460345	-3.88367		+	1.48039e-08	7.82962	0	-0.414302	-6.80184		+	3.59673e-12	11.4441	0	-0.713512	-7.98764	+	+	9.31969e-06	5.0306	3.05927e-05	-0.381577	-4.64717		+	12.2569	12.8977	11.4053	12.6413	12.2112	12.7567	12.7942	13.0136	13.2442	13.1826	12.8269	13.3456	12.9487	13.0991	13.2744	12.9228	13.0986	13.0499
Q9UG56	PISD	Phosphatidylserine decarboxylase proenzyme, mitochondrial	Undefined	0.0065974	2.18063	0.00838945	-0.478574	-2.94343		+	0.00138622	2.85817	0.00103529	-0.243315	-3.39924		+	4.05595e-12	11.3919	0	-1.05101	-7.98797	+	+	7.65424e-06	5.1161	2.3301e-05	0.487744	4.69768		+	10.7452	12.3957	13.2457	11.1514	11.7037	11.673	11.7251	12.1422	12.4261	12.1893	12.7164	12.992	12.9113	12.6216	12.1231	11.9113	12.5777	12.7702
Q9NQP4	PFDN4	Prefoldin subunit 4	Undefined	0.264366	0.577794	0.330545	-0.133261	-1.13545			0.0745295	1.12767	0.0787206	-0.101476	-1.81992			4.32244e-12	11.3643	0	-0.662315	-7.93725	+	+	0.613793	0.211978	0.707963	-0.0326783	-0.506083			12.553	11.9636	13.48	13.1466	13.5541	13.5894	13.6013	13.3579	13.5028	13.0014	13.5197	13.0244	13.646	13.4261	13.1869	13.8201	13.6001	13.6593
Q92845	KIFAP3	Kinesin-associated protein 3	Neuron	0.0132543	1.87764	0.0176718	-0.308676	-2.61351		+	0.00156354	2.80589	0.00117611	-0.158131	-3.34569		+	5.07635e-12	11.2944	0	-0.781969	-7.8807	+	+	0.389583	0.4094	0.492676	0.0533355	0.863699			11.7596	12.0499	12.1116	12.5247	12.3962	12.4572	12.4029	12.2925	12.8664	12.4556	12.5311	12.4707	12.441	12.0769	12.2502	12.2647	12.0879	12.336
P30040	ERP29	Endoplasmic reticulum resident protein 29	Undefined	0.577542	0.238416	0.654927	0.0358193	0.562231			1.231e-05	4.90974	4.74496e-06	-0.17225	-4.83318		+	6.66656e-12	11.1761	0	-0.622915	-7.82457	+	+	0.0880292	1.05537	0.138471	0.109905	1.72077			13.3438	13.8901	13.3802	13.9484	14.1539	13.9563	13.6839	13.7604	13.7973	13.334	13.5283	12.918	13.6968	13.6074	14.0263	13.7795	13.8326	13.6409
Q9UJ41	RABGEF1	Rab5 GDP/GTP exchange factor	Undefined	0.0583877	1.23368	0.0788432	-0.246283	-1.96786			0.00178293	2.74886	0.0013774	-0.278118	-3.32636		+	7.8996e-12	11.1024	0	-0.805459	-7.83567	+	+	0.00557257	2.25394	0.0112113	-0.306072	-2.82924		+	11.6377	11.5232	11.4886	NaN	NaN	11.8073	11.888	11.619	13.8474	12.7124	12.8266	12.9418	13.0306	13.1619	13.0582	13.2401	13.4881	12.745
Q8NB37	GATD1	Glutamine amidotransferase-like class 1 domain-containing protein 1	Undefined	0.182114	0.739658	0.234791	-0.118609	-1.36132			0.0503001	1.29843	0.0515075	-0.0875205	-2.00393			1.08432e-11	10.9648	0	-0.587407	-7.72419	+	+	0.700777	0.15442	0.78268	-0.0181742	-0.385249			13.1198	13.6982	12.7892	13.0013	13.4283	13.5095	13.5381	13.0164	13.4437	13.0097	13.1802	13.1697	13.4234	13.1689	13.2571	12.9364	13.125	13.0244
Q9HAR2	ADGRL3	Adhesion G protein-coupled receptor L3	OPC	0.0537264	1.26981	0.0725412	-0.32413	-2.00053			4.25604e-05	4.37099	1.69492e-05	-0.293189	-4.47844		+	1.20245e-11	10.9199	0	-0.86599	-7.71361	+	+	0.229461	0.639291	0.317008	0.093007	1.20834			11.4536	12.1425	11.6899	12.7906	12.3591	12.4837	12.2664	11.6916	13.0142	12.5301	12.8034	12.4776	12.3099	12.1118	12.4904	11.6545	11.9845	12.1246
Q9H019	MTFR1L	Mitochondrial fission regulator 1-like	Undefined	0.479386	0.319314	0.557019	-0.207707	-0.714943			0.00863557	2.06371	0.00769435	-0.164931	-2.72951		+	1.55233e-11	10.809	0	-0.940101	-7.64997	+	+	0.0139864	1.85429	0.0261569	0.206784	2.49646		+	11.5248	11.9681	12.0219	11.2427	11.4768	11.7783	11.514	11.3623	11.4302	11.7546	11.6558	12.028	11.9936	11.3904	11.8327	11.7617	11.5127	11.3086
Q9BXW6	OSBPL1A	Oxysterol-binding protein-related protein 1	Undefined	0.272227	0.565069	0.338402	-0.208041	-1.11552			0.629031	0.201328	0.649179	-0.0527131	-0.485969			1.74899e-11	10.7572	0	-1.08732	-7.63577	+	+	0.593686	0.226443	0.693743	-0.0795665	-0.535035			12.7822	12.2356	14.1824	15.9597	15.8259	14.1513	14.2819	14.6444	13.7965	14.1837	13.4981	14.0187	13.7233	14.3431	13.8845	14.321	15.9942	13.9409
Q8N461	FBXL16	F-box/LRR-repeat protein 16	Ex	0.000671879	3.17271	0.000967552	-0.345849	-3.73241		+	0.000143825	3.84217	9.26641e-05	-0.181943	-4.10358		+	1.83175e-11	10.7371	0	-0.596063	-7.61569	+	+	3.28194e-10	9.48387	0	-0.453896	-6.89376		+	12.2786	12.461	11.8345	12.2111	12.6251	11.9314	12.2288	12.3769	12.1109	12.0348	11.8357	12.1172	12.0004	11.9894	12.2878	11.9511	12.0486	11.7165
Q76NI1	KNDC1	Kinase non-catalytic C-lobe domain-containing protein 1	Undefined	0.0443622	1.35299	0.0604799	-0.326953	-2.09042			0.000163645	3.7861	0.000111005	-0.386564	-4.07009		+	2.45377e-11	10.6102	0	-0.821649	-7.55505	+	+	0.00132705	2.87711	0.00294082	-0.283088	-3.29221		+	12.6799	11.9515	12.3773	12.7497	12.2996	12.094	12.3413	12.4922	12.6826	12.2177	12.6707	12.7233	12.1915	11.5419	12.5428	11.5093	12.4959	11.9229
Q92643	PIGK	GPI-anchor transamidase	Undefined	0.0990274	1.00424	0.131346	0.215414	1.70425			0.0913199	1.03943	0.0971545	-0.177693	-1.74859			2.52233e-11	10.5982	0	-0.809447	-7.73249	+	+	0.00208342	2.68122	0.00443315	-0.32929	-3.16802		+	11.4076	10.7839	11.0715	NaN	NaN	10.7555	10.6586	NaN	11.8144	12.0659	11.4714	11.1691	11.4464	10.6282	11.6302	11.1271	12.0205	11.4881
Q9Y4E8	USP15	Ubiquitin carboxyl-terminal hydrolase 15	Undefined	0.45982	0.337412	0.536133	-0.118709	-0.747636			0.000958024	3.01862	0.000721683	-0.191459	-3.50185		+	4.62648e-11	10.3347	0	-0.874039	-7.4329	+	+	0.134736	0.870517	0.201119	0.11137	1.50648			12.4157	12.8394	11.8273	12.8985	13.0174	12.7674	12.633	12.2868	12.4601	12.6748	12.9519	12.7774	12.345	12.8558	12.5936	12.6279	12.6741	12.1459
Q7L2E3	DHX30	ATP-dependent RNA helicase DHX30	Undefined	0.162145	0.790096	0.210654	0.202279	1.42894			0.358473	0.445544	0.377053	0.066221	0.926819			7.36221e-11	10.133	0	-0.718141	-7.33557	+	+	0.000110971	3.95479	0.000291845	0.313255	4.00596		+	12.939	12.1671	13.4671	13.3247	13.1421	13.1907	13.0463	13.2284	13.133	13.1525	13.4011	12.774	13.0572	13.0714	12.3508	12.7399	12.7667	13.4926
Q13049	TRIM32	E3 ubiquitin-protein ligase TRIM32	Undefined	5.81464e-05	4.23548	4.16667e-05	0.308605	4.58939		+	0.000431814	3.3647	0.000306087	0.223338	3.76514		+	8.02241e-11	10.0957	0	-0.884417	-7.31754	+	+	0.977089	0.010066	0.988168	0.00267705	0.0287828			12.0997	12.1057	11.8729	11.7272	12.3393	12.4606	12.6445	11.9866	12.3252	11.7049	12.5423	11.8647	12.3167	12.3729	13.3229	11.6194	11.8999	11.754
Q8N2G8	GHDC	GH3 domain-containing protein	Undefined	0.854352	0.0683631	0.888652	0.0307695	0.185476			0.252558	0.597639	0.266265	-0.079612	-1.15809			8.13195e-11	10.0898	0	-1.1218	-7.39818	+	+	0.015303	1.81522	0.0282093	0.278716	2.46327		+	11.9129	11.8045	NaN	11.3374	12.1681	12.194	11.7733	12.1132	12.3182	13.1058	13.1388	13.1983	13.3267	12.7305	12.6042	12.4623	11.8751	13.0987
P62304	SNRPE	Small nuclear ribonucleoprotein E	Undefined	0.990602	0.00410062	0.993558	0.000956959	0.0118628			0.0165397	1.78147	0.0154399	-0.140296	-2.47696		+	9.55005e-11	10.02	0	-0.668231	-7.27167	+	+	0.0904268	1.0437	0.141913	0.120703	1.70776			12.513	12.1618	12.4623	12.7092	12.9477	12.2217	11.9937	12.6816	12.5333	12.7636	12.5579	12.3907	12.4584	12.3294	12.0785	11.9648	12.5902	12.7871
P14406	COX7A2	Cytochrome c oxidase subunit 7A2, mitochondrial	Undefined	0.272289	0.564969	0.338323	-0.0653706	-1.11538			0.506431	0.29548	0.523521	-0.0308247	-0.669037			1.10104e-10	9.9582	0	-0.730299	-7.24185	+	+	0.00153709	2.8133	0.00343026	-0.241005	-3.24666		+	14.2841	14.9888	14.7806	14.3169	13.8828	13.9977	14.4866	14.519	14.3695	14.7351	13.967	14.3944	14.048	14.3775	14.5869	14.4745	14.2747	14.4537
P23258	TUBG1	Tubulin gamma-1 chain	Undefined	0.0692487	1.15959	0.092877	-0.367349	-1.87435			0.0483027	1.31603	0.0494825	-0.105245	-2.0223		+	1.44187e-10	9.84107	0	-0.865577	-7.18522	+	+	0.000545535	3.26318	0.00122722	0.319706	3.55903		+	12.6692	12.8626	12.7973	12.3215	12.7088	12.6305	12.6231	12.4612	12.5586	12.547	12.7427	13.1345	12.4618	11.9455	11.8663	11.9815	12.6761	12.4072
P49441	INPP1	Inositol polyphosphate 1-phosphatase	Undefined	0.897366	0.0470304	0.921825	-0.0185345	-0.12993			0.057552	1.23994	0.059252	-0.17677	-1.94209			1.49365e-10	9.82575	0	-0.745562	-7.18674	+	+	0.161037	0.793075	0.23554	0.120145	1.41093			12.1141	11.7398	11.5563	11.6086	11.8073	12.0036	11.9869	11.87	12.2384	11.9647	12.2457	11.5746	11.9092	11.5632	11.5419	12.0485	11.8585	11.9774
Q9Y5R8	TRAPPC1	Trafficking protein particle complex subunit 1	Undefined	0.162697	0.78862	0.211136	0.155127	1.4261			0.826453	0.0827819	0.846145	-0.0110796	-0.220361			1.52576e-10	9.81651	0	-1.03886	-7.17334	+	+	0.639255	0.194326	0.729811	0.0431068	0.470008			12.4464	12.5104	13.3057	12.9343	12.857	12.6523	12.461	12.4798	12.9319	12.1803	12.973	12.6686	12.6643	12.0418	12.3418	12.2463	12.5828	12.2117
Q9Y4D1	DAAM1	Disheveled-associated activator of morphogenesis 1	Undefined	0.334201	0.475992	0.404427	-0.0773017	-0.979603			0.0903222	1.04421	0.0959367	-0.0993743	-1.72711			1.88327e-10	9.72509	0	-0.663593	-7.1378	+	+	1.7673e-07	6.75269	1.24224e-05	0.429189	5.57395		+	12.4789	12.8792	12.8314	14.6184	14.5364	14.009	13.6301	13.9195	13.8494	13.5054	13.7526	13.5516	13.8461	13.8683	13.367	14.0252	14.3255	13.6621
P23743	DGKA	Diacylglycerol kinase alpha	Undefined	0.0232795	1.63303	0.0317455	-0.460793	-2.37598		+	0.123156	0.909544	0.131175	-0.136706	-1.56926			2.42883e-10	9.6146	0	-0.666529	-7.08399	+	+	0.116766	0.932683	0.178206	-0.145548	-1.5807			11.4541	11.319	10.0347	11.4486	12.0653	12.5655	12.7926	12.6627	12.6205	11.7213	12.5598	12.3849	12.3839	12.677	12.5656	11.5275	11.32	12.289
O43427	FIBP	Acidic fibroblast growth factor intracellular-binding protein	Undefined	0.000637173	3.19574	0.000909361	-0.360267	-3.75111		+	7.98427e-09	8.09776	0	-0.336144	-6.89466		+	2.59184e-10	9.58639	0	-0.603994	-7.06169	+	+	0.00193557	2.71319	0.00417062	-0.223779	-3.1743		+	11.8514	12.3341	12.3912	12.4514	12.5012	12.4037	12.988	12.6265	12.2983	12.7361	12.3143	12.4366	12.7633	12.9049	13.0059	12.0629	12.6849	12.0454
Q99653	CHP1	Calcineurin B homologous protein 1	Undefined	0.613081	0.212482	0.684704	-0.0845506	-0.510247			0.000119418	3.92293	7.82779e-05	-0.258813	-4.16044		+	3.16377e-10	9.49979	0	-0.967497	-7.01955	+	+	0.264703	0.577241	0.355087	-0.0816915	-1.12091			11.8195	13.1512	13.3138	13.9575	13.342	13.0035	12.8628	13.9449	13.7988	13.4433	13.2989	13.8881	13.2603	13.5814	13.0838	13.0574	13.2363	13.312
Q9UFN0	NIPSNAP3A	Protein NipSnap homolog 3A	Undefined	0.0208835	1.6802	0.0282845	0.329628	2.42269		+	0.00671615	2.17288	0.00590463	0.149915	2.82358		+	5.30923e-10	9.27497	0	-1.00385	-6.91785	+	+	0.50219	0.299132	0.605288	-0.0663999	-0.673207			12.1848	12.8005	12.3304	12.7379	13.2621	11.9892	12.2573	12.5357	13.047	12.8908	12.4524	11.7176	12.2172	12.226	12.098	12.7773	12.3825	12.3035
P68402	PAFAH1B2	Platelet-activating factor acetylhydrolase IB subunit alpha2	Undefined	0.000618148	3.20891	0.000884903	-0.317005	-3.76179		+	0.000145965	3.83575	9.6432e-05	-0.23757	-4.09905		+	8.00426e-10	9.09668	0	-0.677596	-6.82239	+	+	3.05185e-05	4.51544	6.57895e-05	0.322551	4.34542		+	14.3889	14.3407	14.6242	14.3718	14.3608	13.9573	14.2234	14.2853	13.8529	14.042	14.5341	14.2012	14.3111	14.4571	13.6523	13.9646	14.0598	14.462
O14522	PTPRT	Receptor-type tyrosine-protein phosphatase T	Neuron	0.741517	0.129879	0.796761	-0.0517405	-0.33263			0.0145144	1.8382	0.0133694	0.258298	2.53427		+	8.07323e-10	9.09295	0	-0.844203	-6.83629	+	+	0.392451	0.406214	0.495204	0.0916528	0.858527			10.5191	10.2654	10.5751	11.2425	11.8536	10.9129	11.1047	NaN	11.6804	11.0125	11.3298	11.6052	11.9043	11.1563	11.4166	10.6126	11.3236	11.8618
O14841	OPLAH	5-oxoprolinase	Undefined	0.00331783	2.47915	0.0042691	0.350074	3.19062		+	7.36746e-06	5.13268	4.914e-06	0.354879	4.98073		+	9.46018e-10	9.0241	0	-0.775225	-6.84438	+	+	0.00273445	2.56313	0.00582246	0.329159	3.06614		+	12.5185	11.3076	11.6732	11.6894	12.4445	12.7427	12.2955	11.6825	12.2683	12.6071	13.2627	12.2405	12.5879	12.8	11.5357	11.6602	12.3366	12.6596
Q92529	SHC3	SHC-transforming protein 3	Neuron	0.579045	0.237288	0.655852	-0.181636	-0.560002			0.452418	0.34446	0.470891	0.113501	0.757194			1.08313e-09	8.96532	0	-1.22071	-6.76536	+	+	0.0192125	1.71642	0.0351139	0.323043	2.37605		+	12.6639	13.1312	13.0499	13.8573	14.0532	12.9312	13.0059	13.4828	12.6697	12.7843	11.3903	13.3574	12.3293	13.5633	14.3765	12.1725	11.8701	12.1076
Q8N4Q0	PTGR3	Prostaglandin reductase 3	Undefined	0.051796	1.2857	0.0697495	0.202638	2.01355			0.32772	0.484497	0.346565	0.070418	0.988016			1.17442e-09	8.93018	0	-0.883018	-6.74045	+	+	0.512922	0.289949	0.617016	0.0680494	0.656368			12.3198	13.2764	13.4041	12.9665	12.7283	12.3233	13.2133	12.02	12.9884	12.6918	12.7323	13.5787	13.069	12.8978	12.7788	12.1667	12.4923	12.6401
P62861	FAU	FAU ubiquitin-like and ribosomal protein S30	Undefined	0.482319	0.316665	0.559686	0.301707	0.710145			0.0502865	1.29855	0.0515116	-0.237989	-2.00405			1.27763e-09	8.8936	0	-2.31583	-6.72241	+	+	0.0149228	1.82615	0.0275997	0.364202	2.47209		+	13.5268	13.7241	14.1364	13.49	13.2396	14.7308	14.1675	13.9645	13.8646	14.0585	14.2372	14.5455	14.3729	14.1673	13.2995	13.1237	14.0271	14.3474
Q9HBH5	RDH14	Retinol dehydrogenase 14	Undefined	5.98992e-06	5.22258	0	0.426204	5.32531		+	2.9149e-11	10.5354	0	0.456853	8.40663		+	2.3334e-09	8.63201	0	-0.635403	-6.59292	+	+	0.0643339	1.19156	0.105927	0.133637	1.86813			13.6577	13.7236	14.0203	13.5399	13.2467	13.5858	13.3365	13.1505	13.4725	13.146	13.577	13.5722	13.768	13.4041	13.1797	13.2176	13.2133	13.5328
Q15165	PON2	Serum paraoxonase/arylesterase 2	Undefined	0.658298	0.181577	0.723831	-0.0748275	-0.446702			0.387272	0.411984	0.405903	-0.0681016	-0.872043			2.41928e-09	8.61631	0	-1.20138	-6.61439	+	+	0.00874462	2.05826	0.0171225	0.372948	2.66916		+	11.3461	11.7896	9.05866	10.8759	12.3921	12.1953	11.6221	11.5381	12.3944	13.0589	13.0201	12.5176	10.7672	12.7752	11.3774	12.1591	11.9098	12.9602
Q15126	PMVK	Phosphomevalonate kinase	Undefined	0.227736	0.642568	0.28955	-0.145428	-1.22839			0.941228	0.0263052	0.949277	-0.00271466	-0.0740838			2.54724e-09	8.59393	0	-0.667748	-6.58103	+	+	5.19088e-08	7.28476	0	0.42199	5.83638		+	12.5978	13.0576	12.6805	13.0757	12.8871	12.8446	12.9118	12.9257	12.9957	13.3691	13.4432	13.1138	13.1157	12.926	12.5974	12.8183	12.922	13.2136
Q9Y276	BCS1L	Mitochondrial chaperone BCS1	Undefined	0.596064	0.224707	0.670634	0.0376364	0.534955			0.751622	0.124001	0.772181	0.0293738	0.318214			2.97914e-09	8.52591	0	-0.638588	-6.54015	+	+	2.22715e-05	4.65225	5.50775e-05	-0.390193	-4.42572		+	11.6387	12.6898	12.6259	13.4528	12.8151	12.5332	12.9963	13.2179	12.9633	12.8926	12.4956	12.835	12.3255	12.1346	13.1671	12.974	12.7027	12.4271
Q9NS69	TOMM22	Mitochondrial import receptor subunit TOM22 homolog	Undefined	0.298404	0.525195	0.367201	-0.111709	-1.05602			0.0951797	1.02146	0.101177	0.115326	1.70023			3.85796e-09	8.41364	0	-0.630015	-6.48416	+	+	0.000111228	3.95379	0.000291013	-0.347586	-4.00663		+	11.7131	14.0643	NaN	13.6445	13.9281	13.4181	14.0243	13.5058	13.709	13.1149	13.981	13.849	13.6395	13.5525	14.4086	13.5007	13.4062	13.1896
Q14643	ITPR1	Inositol 1,4,5-trisphosphate receptor type 1	Neuron	0.794586	0.0998593	0.838418	0.0308244	0.262355			0.890525	0.0503537	0.903397	0.0151169	0.138343			5.88868e-09	8.22998	0	-0.590972	-6.3922	+	+	0.002714	2.56639	0.00575318	0.242713	3.06604		+	12.9844	12.9154	14.5002	14.8039	14.397	13.9887	14.0733	14.4207	13.9984	14.2369	14.317	14.2364	14.0052	14.2786	14.3639	14.1074	14.1266	14.5694
O75340	PDCD6	Programmed cell death protein 6	Undefined	0.197036	0.705455	0.252642	-0.110398	-1.31508			0.220051	0.657477	0.232564	-0.0656972	-1.24134			6.03063e-09	8.21964	0	-0.707777	-6.387	+	+	0.0605151	1.21814	0.100422	0.164168	1.89599			13.6583	13.1641	14.3069	13.6198	14.1013	13.9353	13.6179	13.302	13.9117	13.4605	14.1206	13.8257	14.2338	14.0235	13.6622	13.7473	13.5821	14.0162
Q15119	PDK2	[Pyruvate dehydrogenase	Undefined	0.668915	0.174629	0.732742	0.036401	0.431273			0.96105	0.0172542	0.966421	0.00253247	0.0490723			6.74781e-09	8.17084	1.2945e-05	-0.608441	-6.36248	+	+	0.00721233	2.14192	0.0143264	-0.210067	-2.73658		+	14.854	16.8119	16.8524	16.9262	16.4038	16.3488	16.3984	16.4306	16.7845	16.4198	16.4388	16.6891	16.4842	16.2153	16.972	16.3032	16.8465	16.6821
O00562	PITPNM1	Membrane-associated phosphatidylinositol transfer protein 1	Undefined	0.104982	0.978885	0.138949	-0.255743	-1.67752			0.000402815	3.39489	0.000298507	-0.395352	-3.82289		+	9.84884e-09	8.00662	1.21951e-05	-0.756258	-6.34117	+	+	0.215283	0.666991	0.301236	-0.123703	-1.24649			11.5564	10.7242	12.5962	10.4143	11.8866	11.4168	11.7249	10.1349	12.2322	11.8964	11.4161	11.9714	12.5499	12.1619	12.0594	11.709	12.0699	12.2834
P83731	RPL24	60S ribosomal protein L24	Undefined	0.000173468	3.76078	0.00016819	-0.326817	-4.20178		+	2.97239e-09	8.52689	0	-0.458236	-7.13882		+	1.44142e-08	7.84121	1.16279e-05	-0.618105	-6.19592	+	+	0.456652	0.340414	0.559444	-0.0596082	-0.746938			13.6101	13.7778	14.1618	13.4998	13.877	14.0098	13.4445	13.2704	14.2016	13.7523	13.7757	13.9294	13.8898	13.7804	13.8547	13.9626	14.1497	13.9071
Q6P9B6	MEAK7	MTOR-associated protein MEAK7	Undefined	0.216334	0.664876	0.275232	-0.153271	-1.26126			0.0110696	1.95587	0.0100683	-0.229697	-2.6451		+	1.65773e-08	7.78049	1.14943e-05	-0.712984	-6.17699	+	+	0.0119789	1.92158	0.0226323	-0.240099	-2.5552		+	11.8946	11.6215	11.5015	11.4853	10.2198	12.5776	12.5509	12.5371	12.8713	12.4627	12.5281	13.0519	12.616	12.4672	12.4956	12.3157	12.5376	12.4407
Q13405	MRPL49	39S ribosomal protein L49, mitochondrial	Undefined	0.634102	0.197841	0.702963	0.0470632	0.480414			0.182614	0.738466	0.193849	-0.0738884	-1.35273			1.69288e-08	7.77137	1.14613e-05	-0.599329	-6.1663	+	+	2.41091e-09	8.61782	0	-0.575354	-6.50135		+	12.3976	11.7897	11.6449	11.4072	11.8467	12.2086	12.4095	12.1034	12.3479	12.1861	11.9025	12.9178	12.5907	12.6154	12.6317	12.18	12.2916	12.5357
O00534	VWA5A	von Willebrand factor A domain-containing protein 5A	Undefined	0.835464	0.0780721	0.873022	-0.0621681	-0.210426			0.295077	0.530064	0.310889	0.0995355	1.05837			1.82891e-08	7.73781	1.10803e-05	-1.04898	-6.31204	+	+	4.34429e-05	4.36208	0.000101587	0.461701	4.27674		+	10.3685	10.388	10.0426	10.5467	9.54083	11.0957	10.5074	NaN	10.254	10.5538	11.4402	10.2362	10.8685	11.3155	10.274	10.0712	11.228	11.6855
Q9Y4D8	HECTD4	Probable E3 ubiquitin-protein ligase HECTD4	Undefined	0.563502	0.249104	0.640103	-0.128245	-0.583718			0.18676	0.728716	0.197795	-0.113334	-1.33822			2.60558e-08	7.5841	1.06667e-05	-0.810453	-6.07622	+	+	0.0402764	1.39495	0.068995	0.19073	2.07501			11.5836	11.6699	11.6201	13.6729	12.5729	11.7807	11.9098	11.5892	12.0412	11.8279	12.3718	11.4296	11.8263	12.0009	11.1689	11.7725	12.0797	11.7068
Q9BYT8	NLN	Neurolysin, mitochondrial	Undefined	0.0670012	1.17392	0.0900721	-0.233341	-1.96517			0.75161	0.124007	0.772438	-0.095428	-0.319537			4.37342e-08	7.35918	1.02828e-05	-0.752565	-6.25297	+	+	0.0464103	1.33339	0.0790809	-0.525767	-2.02609			13.5405	10.1906	9.7764	13.6469	10.1878	13.6023	10.5482	13.3668	10.3745	13.2478	7.71859	13.3672	13.85	13.6227	NaN	13.5576	13.1638	13.6171
A5YKK6	CNOT1	CCR4-NOT transcription complex subunit 1	Undefined	0.733395	0.134662	0.788994	0.115238	0.346618			0.00491799	2.30821	0.00415708	-0.287785	-2.94867		+	5.1181e-08	7.29089	1.00756e-05	-1.34199	-6.03115	+	+	0.00337479	2.47175	0.00715975	0.426353	2.99909		+	10.2539	10.1275	NaN	11.2997	11.3705	10.2519	9.66784	9.62755	10.6138	10.2869	11.008	10.5712	10.8923	10.2895	10.2411	10.244	10.1017	10.9794
Q92871	PMM1	Phosphomannomutase 1	Undefined	0.00506873	2.2951	0.00633727	-0.283165	-2.9908		+	0.000229347	3.63951	0.000163417	-0.205809	-3.95942		+	8.63879e-08	7.06355	9.36768e-06	-0.688526	-5.80073	+	+	0.190693	0.719664	0.272751	0.119163	1.3165			12.54	12.8444	12.2073	11.9652	12.9965	13.0627	12.8698	12.7167	12.5107	12.2928	12.4762	13.0031	12.9857	12.3946	12.5398	12.4066	12.2014	12.5107
Q9Y376	CAB39	Calcium-binding protein 39	Undefined	0.820052	0.0861585	0.860043	-0.0214617	-0.229194			0.552553	0.257626	0.570749	-0.0409545	-0.597823			1.23222e-07	6.90931	8.94855e-06	-0.695403	-5.71502	+	+	0.000408582	3.38872	0.000957882	0.340727	3.64288		+	13.1325	13.2052	13.2873	12.591	12.8731	13.2181	12.792	12.4899	12.661	12.0885	12.7899	12.4872	12.9315	12.7582	12.5849	12.2067	12.4975	13.2191
O00194	RAB27B	Ras-related protein Rab-27B	Undefined	0.038951	1.40948	0.0533314	-0.295317	-2.15032			0.0105428	1.97704	0.00958701	-0.194168	-2.65542		+	1.48996e-07	6.82683	1.75824e-05	-0.811921	-5.67633	+	+	2.991e-05	4.52418	6.62252e-05	0.471679	4.35222		+	14.843	13.6505	13.2634	13.3155	13.204	13.4514	13.3369	13.4306	13.1069	13.5908	13.5775	13.4531	13.8659	13.0222	12.6397	12.3941	12.712	12.7952
O14561	NDUFAB1	Acyl carrier protein, mitochondrial	Undefined	0.205289	0.687635	0.261999	-0.233091	-1.29136			0.272151	0.565191	0.287408	0.135939	1.1099			1.56269e-07	6.80613	1.75055e-05	-0.712983	-5.67506	+	+	0.369466	0.432426	0.470424	0.117575	0.901139			12.5954	12.9012	11.6076	12.2799	12.7987	11.9959	12.3084	12.5097	12.2343	12.369	12.3262	12.5337	12.4743	12.1089	12.7316	12.4715	12.4805	12.4785
A2RTX5	TARS3	Threonine--tRNA ligase 2, cytoplasmic	Undefined	0.263344	0.579477	0.329824	0.0867065	1.13735			0.317942	0.497652	0.336076	-0.0726004	-1.00838			1.71568e-07	6.76556	1.73536e-05	-0.587731	-5.64395	+	+	0.000540639	3.26709	0.00123006	0.31937	3.56167		+	12.8907	13.2822	13.6272	14.619	14.4278	13.5771	13.3766	14.2296	13.2745	13.8695	13.6028	13.281	13.6232	13.9219	15.3655	13.7238	13.7111	13.365
P35244	RPA3	Replication protein A 14 kDa subunit	Undefined	0.0269839	1.56889	0.036399	-0.313234	-2.3298		+	0.813895	0.0894318	0.834883	0.020136	0.236626			1.86943e-07	6.72829	1.71674e-05	-0.837021	-5.63367	+	+	0.0223308	1.6511	0.0402069	0.261944	2.31684		+	13.1133	11.6362	12.1022	11.9618	12.4479	12.5164	12.6102	11.9692	11.2919	11.8112	12.5442	12.6108	11.3322	12.4547	11.9162	11.3002	12.0633	11.8582
Q04446	GBE1	1,4-alpha-glucan-branching enzyme	Undefined	0.670085	0.17387	0.734051	-0.143907	-0.429755			0.229931	0.638403	0.242699	0.11571	1.2148			2.01738e-07	6.69521	1.7094e-05	-1.29018	-5.60665	+	+	0.150971	0.821105	0.222009	0.167192	1.44591			9.22988	11.2629	11.9644	11.6433	11.9724	11.6416	11.5665	11.6001	11.0424	12.2039	11.9518	11.6118	11.7215	12.0904	10.486	10.9603	11.4542	11.4104
Q15631	TSN	Translin	Undefined	0.192739	0.715031	0.247501	0.235745	1.33056			0.172699	0.762711	0.183706	0.123817	1.38259			2.22357e-07	6.65295	1.69492e-05	-1.09897	-5.59348	+	+	0.000538807	3.26857	0.00122685	0.496248	3.56552		+	11.72	10.9657	12.0046	11.1009	11.6211	11.517	10.9759	10.834	11.4278	11.5487	12.1903	11.7012	12.0048	11.4215	10.6038	11.3827	11.0378	11.7956
O14830	PPEF2	Serine/threonine-protein phosphatase with EF-hands 2	Undefined	0.149519	0.825305	0.196275	0.254169	1.47461			0.814354	0.0891867	0.834873	-0.0321478	-0.236007			2.25083e-07	6.64766	1.68421e-05	-0.939572	-5.58596	+	+	0.589071	0.229832	0.689919	0.0782663	0.541744			12.0844	12.1452	12.0525	13.3381	13.4716	11.9253	11.958	14.0765	12.9119	12.9017	11.5255	12.1536	11.5441	12.062	13.7882	12.7828	13.4215	11.8848
P23763	VAMP1	Vesicle-associated membrane protein 1	Undefined	0.047692	1.32155	0.0647085	-0.176369	-2.05217			1.24851e-06	5.90361	0	-0.210531	-5.4822		+	2.62945e-07	6.58013	1.65975e-05	-0.585494	-5.541	+	+	0.0737096	1.13248	0.1197	-0.137315	-1.80518			14.0468	14.0006	12.7611	13.9086	13.1864	13.623	13.7858	13.8911	14.0701	13.7277	14.0763	14.6131	13.8557	14.4666	14.2355	13.8958	13.9267	13.855
Q8NE86	MCU	Calcium uniporter protein, mitochondrial	Undefined	0.644418	0.190832	0.712122	0.140576	0.465674			0.003253	2.48772	0.00264633	0.372358	3.1014		+	2.96294e-07	6.52828	1.63599e-05	-1.07461	-5.52214	+	+	0.425565	0.371035	0.529756	0.135626	0.799749			13.9118	14.0032	12.7961	13.1858	15.5782	14.6363	15.1701	14.9895	15.0586	14.7299	13.8928	15.5425	14.2837	15.1075	15.4135	14.1083	15.0362	NaN
Q9NRF2	SH2B1	SH2B adapter protein 1	Undefined	0.51325	0.289671	0.591662	0.149812	0.667761			0.215427	0.666699	0.228071	-0.200181	-1.26231			5.13529e-07	6.28944	8.577e-05	-0.878546	-5.44628	+	+	0.9878	0.00533115	0.993616	0.00209781	0.0153306			10.9336	11.2043	9.28525	9.63009	9.81755	11.3182	11.1252	11.2194	9.89774	11.1187	11.238	10.4609	10.5955	10.8791	11.05	NaN	8.43283	9.82597
P12235	SLC25A4	ADP/ATP translocase 1	Undefined	0.747795	0.126217	0.801351	0.0266344	0.324094			0.368724	0.433299	0.388006	-0.0731433	-0.906746			5.58927e-07	6.25264	9.21305e-05	-0.609891	-5.36534	+	+	0.0209222	1.67939	0.0380286	-0.261889	-2.34218		+	14.6419	14.7042	13.1799	13.8001	13.7917	13.398	13.0837	13.8799	12.6585	14.1734	12.526	13.7698	13.3223	13.5307	14.0335	13.2645	13.8829	13.0271
Q9ULH1	ASAP1	Arf-GAP with SH3 domain, ANK repeat and PH domain-containing protein 1	Undefined	0.655854	0.183193	0.721663	-0.0411018	-0.449597			0.0173592	1.76047	0.0162662	-0.143444	-2.45756		+	8.2394e-07	6.0841	0.000125693	-0.587942	-5.27771	+	+	0.0424805	1.37181	0.0726041	-0.152243	-2.052			12.5653	13.2492	13.408	12.8229	12.9695	12.6877	12.9085	12.4931	12.9875	12.7949	12.8673	12.7779	12.6879	12.6373	12.9713	12.9004	12.6104	12.4662
P33121	ACSL1	Long-chain-fatty-acid--CoA ligase 1	Undefined	0.483462	0.315638	0.56048	0.0819672	0.714026			0.0151713	1.81898	0.0140413	0.541488	2.55756		+	1.52057e-06	5.81799	0.000191126	-0.678145	-5.30123	+	+	0.00463928	2.33355	0.00952122	-0.534459	-2.91295		+	15.3418	14.8132	15.3886	15.5826	11.0706	15.4981	14.8984	15.5361	NaN	11.7749	15.3168	15.4147	15.5866	12.4216	NaN	15.3547	12.4838	NaN
Q96MC5	BMERB1	bMERB domain-containing protein 1	Undefined	0.857972	0.0665269	0.891816	0.0751568	0.180281			0.00022192	3.6538	0.000160448	0.560104	3.96967		+	2.67735e-06	5.57229	0.00029393	-1.08311	-4.99108	+	+	0.941608	0.0261297	0.965946	-0.0104189	-0.0734116			12.4757	14.6941	13.5546	14.2314	14.9277	15.3113	14.4469	14.509	13.1422	14.5363	14.5535	14.1979	14.578	15.2429	13.6962	15.2806	14.3077	14.3698
Q5JVS0	HABP4	Intracellular hyaluronan-binding protein 4	Undefined	0.0374378	1.42669	0.0511108	-0.266192	-2.16572			0.000317405	3.49839	0.000226212	-0.415074	-3.8869		+	2.76451e-06	5.55838	0.000297468	-0.756314	-4.98656	+	+	0.833416	0.0791383	0.888251	0.023454	0.210814			12.569	11.8216	12.5937	12.155	11.9042	12.49	12.7219	11.9913	11.77	12.2122	12.589	13.1272	12.3855	11.9887	12.3542	11.0583	12.0739	11.8312
P20648	ATP4A	Potassium-transporting ATPase alpha chain 1	Undefined	0.943049	0.0254657	0.958036	-0.0066078	-0.0719527			0.000835323	3.07815	0.000600985	-0.19012	-3.54692		+	6.21482e-06	5.20657	0.000467836	-0.611225	-4.78382	+	+	0.0310228	1.50832	0.0544005	-0.180175	-2.18408			17.8896	17.7945	17.8874	17.4351	17.1517	18.2869	18.0498	17.2086	17.8306	17.3259	18.1811	18.2258	18.5851	18.3334	18.2219	17.9606	17.744	17.8681
P00491	PNP	Purine nucleoside phosphorylase	Undefined	0.0994182	1.00253	0.13162	0.656045	1.717			0.396472	0.401788	0.41441	0.122767	0.855143			6.35886e-06	5.19662	0.000478832	-1.52193	-4.84283	+	+	0.0565737	1.24739	0.0945686	0.35289	1.92786			10.8426	10.1914	10.9655	12.308	12.3781	10.8899	9.74392	11.7449	10.2499	11.3177	11.6018	10.3248	11.3012	11.4027	12.5724	12.1849	12.7517	11.2656
P98179	RBM3	RNA-binding protein 3	Undefined	0.133472	0.874611	0.175734	-0.205722	-1.54899			0.988607	0.00497647	0.989805	0.0021642	0.0143652			6.36352e-06	5.1963	0.000478134	-0.981337	-4.80325	+	+	0.0433903	1.36261	0.0740612	-0.32886	-2.04419			12.0776	12.5933	12.9833	12.8646	9.96127	7.65514	11.1853	12.0511	12.5918	12.539	12.0392	13.2285	11.2761	11.5419	12.0273	12.001	12.1469	11.8588
Q96I15	SCLY	Selenocysteine lyase	Undefined	0.111389	0.953158	0.147149	0.280623	1.6403			0.830665	0.0805741	0.84981	0.0447293	0.215184			1.09154e-05	4.96196	0.000699029	-0.982539	-4.67237	+	+	0.226682	0.644583	0.314147	0.253328	1.21651			12.4352	10.8955	9.18844	10.91	15.7615	13.0193	12.7974	12.1246	12.6347	11.7019	12.3414	13.0527	11.6165	14.1173	13.3378	12.5871	13.9794	NaN
Q13616	CUL1	Cullin-1	Undefined	0.0488815	1.31086	0.065993	0.375166	2.04515			0.916868	0.0376934	0.924576	0.0119313	0.104955			1.16241e-05	4.93464	0.000751715	-0.642378	-4.63756	+	+	0.758108	0.120269	0.830814	-0.0342897	-0.308741			13.409	12.5196	12.0203	13.701	12.775	13.8293	13.3944	15.4238	13.5334	13.4275	13.8569	13.333	13.2441	13.9085	12.8326	13.3554	14.2956	13.9743
Q1L5Z9	LONRF2	LON peptidase N-terminal domain and RING finger protein 2	Neuron	0.0700141	1.15481	0.0937809	0.313732	1.88124			0.0587405	1.23106	0.0607143	0.22597	1.93937			1.34837e-05	4.87019	0.000872629	-0.969656	-4.60244	+	+	0.318329	0.497124	0.416666	0.152266	1.00257			11.03	10.8917	11.3583	11.8648	11.8633	11.1623	10.4059	10.9924	11.3404	11.4634	11.8253	12.1663	11.1913	11.6015	11.868	11.3381	12.4521	11.3748
Q567U6	CCDC93	Coiled-coil domain-containing protein 93	Undefined	0.00571805	2.24275	0.00714345	0.239956	3.01188		+	0.180413	0.743733	0.191827	0.15717	1.35847			2.1964e-05	4.65829	0.00127017	-0.59417	-4.54112	+	+	0.631942	0.199323	0.723161	0.0664087	0.480566			13.0122	13.2189	12.9585	12.8265	12.2025	9.79268	8.87385	11.5656	10.6156	11.1026	11.6201	13.2177	11.834	13.2232	12.1618	12.2119	11.6699	12.5497
Q05193-2	DNM1	Dynamin-1	Neuron	0.106266	0.973607	0.140507	-0.214195	-1.65795			0.00799159	2.09737	0.00705678	-0.213284	-2.75871		+	2.44323e-05	4.61204	0.00136364	-0.801443	-4.43591	+	+	0.0143042	1.84454	0.0266342	-0.330823	-2.48803		+	15.7932	15.7614	15.8902	16.3306	16.0249	15.8586	15.1847	15.4447	15.0906	15.077	14.7333	13.8098	15.6514	15.0309	14.3709	16.0962	15.7273	15.5481
O75064	DENND4B	DENN domain-containing protein 4B	Undefined	0.284759	0.545522	0.352169	-0.125019	-1.08735			0.00962133	2.01676	0.00865013	-0.206063	-2.68848		+	3.13742e-05	4.50343	0.00169682	-0.697895	-4.37295	+	+	0.000138606	3.85822	0.000351464	0.458124	3.9456		+	12.9053	13.102	13.4887	12.8923	12.627	13.2256	12.9761	12.9388	13.0729	12.0128	12.7528	13.2955	13.488	12.939	12.4157	12.2265	12.3962	12.9214
Q13595	TRA2A	Transformer-2 protein homolog alpha	Undefined	0.391737	0.407005	0.467453	0.144955	0.869456			0.198553	0.702124	0.210288	-0.160714	-1.30537			3.32918e-05	4.47766	0.00180848	-0.744243	-4.35968	+	+	0.000837206	3.07717	0.00188889	0.412705	3.43483		+	11.9189	10.7644	11.5419	12.1853	12.1192	11.4164	11.4903	11.7289	11.9672	11.6527	12.7871	12.4	12.483	11.9209	11.4374	12.0645	12.6604	12.2671
Q13867	BLMH	Bleomycin hydrolase	Undefined	0.0234255	1.63031	0.0318959	0.402522	2.37009		+	0.846304	0.0724736	0.865184	0.017798	0.194806			3.34494e-05	4.47561	0.00180895	-0.695637	-4.35388	+	+	0.832172	0.0797869	0.887578	-0.028321	-0.212407			14.8635	14.9846	14.4889	16.8099	16.8273	15.1155	15.5874	16.5957	14.9713	15.1681	14.9855	14.5784	14.4666	14.7201	15.2257	15.2365	15.9953	15.1178
Q96BY6	DOCK10	Dedicator of cytokinesis protein 10	Undefined	0.0839785	1.07583	0.111766	0.495222	1.81409			0.372085	0.429358	0.390406	0.199284	0.906135			3.76463e-05	4.42428	0.0019378	-1.20768	-4.41068	+	+	0.033114	1.47999	0.0576541	-0.431423	-2.16919			9.89478	10.3868	NaN	13.7863	12.677	9.93698	12.0686	11.7491	13.7128	11.7052	11.152	NaN	10.5506	NaN	11.2339	10.6877	NaN	11.5313
Q9NZT2	OGFR	Opioid growth factor receptor	Undefined	0.440216	0.356334	0.517809	0.190906	0.78072			0.505096	0.296626	0.522122	0.0544991	0.671149			5.08894e-05	4.29337	0.00249423	-0.791781	-4.24495	+	+	0.314675	0.502138	0.412359	-0.116176	-1.00999			13.4913	12.5127	12.9273	13.2931	13.4062	12.8144	12.9551	13.452	12.8446	13.3922	13.0462	13.3522	13.1577	12.9767	12.7695	13.0431	13.9317	12.9195
O75223	GGCT	Gamma-glutamylcyclotransferase	Undefined	0.0966801	1.01466	0.128479	0.25314	1.707			0.357001	0.44733	0.376495	0.0930216	0.929351			5.18228e-05	4.28548	0.00250917	-0.641304	-4.23801	+	+	0.550402	0.25932	0.65279	-0.078414	-0.598955			13.3708	14.1769	14.0757	15.7975	15.4455	14.1759	13.6707	15.0015	13.4544	13.2937	13.0453	13.2987	13.0364	13.092	14.1703	14.5039	15.1862	13.0312
P35221	CTNNA1	Catenin alpha-1	Undefined	0.157774	0.801965	0.206031	0.407049	1.54072			0.0574319	1.24085	0.0591302	0.528457	2.01601			7.82108e-05	4.10673	0.00348246	-0.866619	-4.35567	+	+	0.129584	0.88745	0.194736	-0.312096	-1.53686			NaN	NaN	NaN	NaN	11.8357	NaN	NaN	NaN	11.6112	12.1899	11.8899	NaN	10.7788	9.81293	8.68268	11.3611	NaN	11.5283
P53618	COPB1	Coatomer subunit beta	Undefined	0.478577	0.320048	0.556153	0.132158	0.716498			0.57178	0.242771	0.59037	-0.0814036	-0.569341			8.53643e-05	4.06872	0.00379153	-0.669338	-4.11147	+	+	0.00126075	2.89937	0.00277172	0.47796	3.31278		+	11.924	11.6815	12.1665	15.0108	12.7353	14.079	13.0976	13.031	13.1737	12.7403	13.2041	12.4478	13.319	12.8982	13.4672	12.4015	12.199	13.8326
Q9BRK0	REEP2	Receptor expression-enhancing protein 2	Undefined	0.180865	0.742646	0.233592	0.243686	1.36532			0.00147087	2.83242	0.00111751	-0.24578	-3.3626		+	8.91764e-05	4.04975	0.00398274	-0.637992	-4.09167	+	+	1.0186e-09	8.992	0	-0.575268	-6.66346		+	11.9422	12.2113	11.5396	12.3013	12.3432	12.2208	12.3146	12.2254	12.4754	12.1493	11.3678	12.1849	12.0013	11.8571	12.2566	12.0343	12.3342	11.6248
O43166	SIPA1L1	Signal-induced proliferation-associated 1-like protein 1	Neuron	0.901574	0.0449987	0.925858	-0.0238904	-0.12469			0.438935	0.3576	0.457375	0.0867864	0.780774			9.67756e-05	4.01423	0.00425559	-0.657407	-4.07707	+	+	0.0783924	1.10573	0.1253	-0.21197	-1.77695			11.5746	10.8203	11.1278	9.61062	11.1527	11.1822	11.5429	11.6857	12.4528	11.809	11.9765	12.0969	11.5102	11.2148	11.542	11.1538	10.8135	10.9468
P29508	SERPINB3	Serpin B3	Undefined	0.0453545	1.34338	0.0618528	1.06473	2.09484			0.169528	0.770759	0.180454	0.299773	1.39563			0.000119615	3.92222	0.00504583	-1.47251	-4.02254	+	+	0.542326	0.265739	0.645734	-0.152492	-0.611275			12.0923	13.1573	11.7332	14.3311	14.8006	13.0892	12.9887	15.5127	12.3981	13.695	13.5246	12.3936	12.2683	13.0383	15.6894	14.5844	14.9818	12.6674
Q8NDA8	MROH1	Maestro heat-like repeat-containing protein family member 1	Undefined	0.874349	0.058315	0.903243	0.0405661	0.164022			0.00368464	2.43361	0.00305036	0.315747	3.10047		+	0.000148925	3.82703	0.00597762	-0.845435	-4.05517	+	+	0.0402907	1.3948	0.0689845	0.256102	2.08017			11.1535	11.961	11.1997	11.2687	11.9845	10.9678	10.9974	11.3212	11.6746	11.5067	10.9388	10.4145	11.161	10.9955	NaN	NaN	NaN	11.4548
Q9BZ71	PITPNM3	Membrane-associated phosphatidylinositol transfer protein 3	Undefined	0.2077	0.682564	0.264909	-0.422504	-1.28365			0.313768	0.503392	0.331622	-0.208394	-1.01988			0.000168385	3.7737	0.006428	-0.8119	-3.91951	+	+	0.0495018	1.30538	0.0839063	-0.494161	-1.98658			10.0635	10.5744	13.8675	13.4781	9.19374	11.6237	11.7703	11.9446	12.6716	11.6196	13.4817	12.8728	13.2044	12.26	12.1424	11.8092	11.524	11.8306
P83916	CBX1	Chromobox protein homolog 1	Undefined	0.35479	0.450028	0.427522	0.475031	0.945266			0.629369	0.201095	0.649121	-0.375864	-0.486661			0.000177024	3.75197	0.00670916	-2.31572	-3.95236	+	+	0.209221	0.679395	0.294361	-0.846453	-1.26466			11.2274	1.92247	12.7469	1.68296	13.1902	1.28967	1.43608	13.9154	NaN	13.5312	12.7027	NaN	1.48436	13.3767	13.8674	12.8763	11.8494	13.2104
Q99622	C12orf57	Protein C10	Undefined	0.0643728	1.1913	0.0866808	0.438089	1.9117			0.0746922	1.12672	0.0788682	0.161215	1.81887			0.000196699	3.7062	0.00725545	-0.805876	-3.87244	+	+	0.229604	0.639021	0.316935	-0.120598	-1.20791			10.9908	12.084	13.7004	13.6314	13.1944	14.0957	13.7401	13.357	13.9036	13.4677	14.5549	14.0414	13.8606	13.9108	14.038	13.7704	14.0421	13.481
Q13641	TPBG	Trophoblast glycoprotein	Undefined	0.236475	0.626214	0.300121	0.534433	1.25218			0.0496797	1.30382	0.050866	3.82652	2.1824			0.000207943	3.68206	0.00754028	-1.14093	-3.90263	+	+	0.168358	0.773767	0.244359	-1.00328	-1.39009			NaN	14.0497	9.93202	14.1878	NaN	NaN	NaN	12.5819	9.55191	13.7025	9.69975	2.70097	2.79275	10.4978	NaN	13.8243	13.861	14.1572
Q86YQ8	CPNE8	Copine-8	Undefined	0.204631	0.689029	0.261042	1.34555	1.85576			0.166083	0.779675	0.176762	-0.519325	-1.43241			0.000244797	3.61119	0.00837476	-2.17664	-3.93366	+	+	0.0677537	1.16907	0.11093	0.505561	1.85142			9.10555	9.53075	9.02608	11.7884	NaN	9.52771	10.0134	NaN	NaN	10.7026	10.2083	9.66906	10.2187	9.83013	NaN	9.09361	10.1666	8.55547
P31151	S100A7	Protein S100-A7	Undefined	0.14071	0.851676	0.184363	0.882988	1.52347			0.542816	0.265347	0.560869	0.158101	0.613441			0.000255627	3.59239	0.00862298	-1.63764	-3.81145	+	+	0.437665	0.358858	0.540204	-0.237346	-0.779201			12.4365	11.1318	11.7194	14.1215	13.342	12.9083	11.8109	12.7098	11.239	12.3851	11.473	11.6499	13.2266	NaN	13.1163	12.6115	13.3136	12.5772
P06702	S100A9	Protein S100-A9	Undefined	0.817823	0.0873406	0.858302	0.118842	0.232086			0.341517	0.466588	0.359792	0.2197	0.959962			0.000289844	3.53784	0.00950887	-1.30038	-3.76214	+	+	0.611209	0.21381	0.706486	-0.148398	-0.509767			12.9389	13.3958	12.9466	16.0322	16.9678	15.0705	14.3392	15.6344	14.0732	13.6322	12.0786	12.5285	13.0074	12.796	15.0535	14.2494	15.1099	14.1871
Q96P63-2	SERPINB12	Serpin B12	Undefined	0.0485947	1.31341	0.06575	1.07919	2.05881			0.269431	0.569552	0.284554	0.224694	1.11652			0.000348127	3.45826	0.0109635	-1.57054	-3.71683	+	+	0.256896	0.590243	0.346985	0.290619	1.13968			12.9054	12.9353	11.7366	15.7855	17.2923	14.0648	13.5959	16.4848	13.3312	15.6084	13.1275	13.8726	13.451	14.4894	15.5968	15.443	16.2435	13.3333
Q8IXI1	RHOT2	Mitochondrial Rho GTPase 2	Undefined	0.740277	0.130606	0.795578	0.0762622	0.33457			0.00769941	2.11354	0.00680429	0.389175	2.77715		+	0.00067667	3.16962	0.0173651	-0.639974	-3.51846	+	+	0.787228	0.1039	0.85516	-0.042726	-0.270565			10.6986	10.6439	11.8436	9.48242	12.1849	9.71433	11.8373	12.0639	12.5127	11.4602	11.5731	11.4714	11.6587	12.0023	12.7949	9.69469	12.8747	12.6586
Q86V81	ALYREF	THO complex subunit 4	Undefined	0.405706	0.391788	0.481259	-0.341688	-0.841635			0.181833	0.740328	0.193016	-0.12198	-1.35324			0.000792112	3.10121	0.0192233	-0.808508	-3.46583	+	+	0.00379958	2.42026	0.00796853	-0.334919	-2.95555		+	13.8288	13.5285	12.9278	13.3158	13.0666	13.5925	13.2875	13.2771	13.4406	13.8511	13.8038	13.9157	13.4042	12.3508	13.6573	11.0064	12.0178	13.1991
Q96PQ0	SORCS2	VPS10 domain-containing receptor SorCS2	Ex	0.0489065	1.31063	0.0659916	0.512758	2.27568			0.00126421	2.89818	0.000944708	0.472709	3.67242		+	0.000895794	3.04779	0.0209951	-0.827368	-3.55747	+	+	0.160441	0.794686	0.234759	0.228616	1.4218			NaN	NaN	NaN	NaN	NaN	NaN	10.4522	10.4924	11.2363	10.7955	11.3098	10.7793	9.35911	10.6139	9.82199	10.0969	NaN	10.2394
A6NCE7	MAP1LC3B2	Microtubule-associated proteins 1A/1B light chain 3 beta 2	Undefined	0.231223	0.63597	0.294116	-0.178593	-1.2184			0.12784	0.893332	0.136294	-0.294866	-1.54736			0.00104549	2.98068	0.0233252	-0.773303	-3.3811	+	+	0.0790338	1.10219	0.12632	0.398579	1.77234			11.1017	11.1184	12.7962	12.2397	11.1292	11.6678	13.1056	11.7319	12.5826	11.0098	11.1685	11.1289	13.1345	11.5825	11.6742	10.179	11.1833	11.4792
Q8N465	D2HGDH	D-2-hydroxyglutarate dehydrogenase, mitochondrial	Undefined	0.265442	0.576031	0.331838	-0.409763	-1.13635			0.580602	0.236121	0.600181	0.0587746	0.556931			0.00127013	2.89615	0.0265429	-0.6935	-3.32878	+	+	0.00792892	2.10079	0.0155632	0.421947	2.70792		+	11.5621	11.8344	11.3025	11.4433	11.6637	11.4813	10.9781	11.4458	11.6317	11.5178	12.2882	11.0483	12.7702	12.4315	13.9617	10.9509	12.8229	13.2116
Q8IWT6	LRRC8A	Volume-regulated anion channel subunit LRRC8A	Undefined	0.173576	0.76051	0.22404	0.311757	1.39182			0.875195	0.057895	0.889394	0.015704	0.15794			0.00128768	2.89019	0.0266898	-0.691893	-3.31869	+	+	0.0052669	2.27845	0.0106267	-0.400474	-2.847		+	10.7655	9.97008	8.39769	10.1231	12.6024	11.9074	11.6951	11.6641	12.6145	12.554	12.1762	12.8429	12.0756	12.959	12.1699	11.932	12.5656	12.4529
P31321	PRKAR1B	cAMP-dependent protein kinase type I-beta regulatory subunit	Undefined	0.801104	0.0963113	0.843503	0.0739734	0.254022			0.00558728	2.2528	0.00473757	-0.367104	-2.89899		+	0.00180445	2.74366	0.0331229	-0.615007	-3.21118	+	+	0.663433	0.178203	0.75028	0.0593035	0.436325			12.3884	11.6203	13.2296	13.1235	12.2026	12.2206	12.9965	13.3487	12.5179	13.1752	12.1746	12.68	12.5242	11.923	12.6913	12.8276	13.7069	12.1138
Q96PU8	QKI	KH domain-containing RNA-binding protein QKI	Undefined	0.15885	0.799014	0.206829	0.596112	1.46358			0.585943	0.232145	0.605134	0.315873	0.550118			0.00181179	2.74189	0.0332039	-1.89661	-3.23641	+	+	0.588191	0.230482	0.689151	0.297118	0.543411			11.7195	11.0965	1.34147	7.76596	9.63494	NaN	0.458113	0.358182	11.692	11.6346	12.2446	NaN	11.5189	10.867	8.80803	11.6787	7.6611	11.5067
Q9UJ68	MSRA	Mitochondrial peptide methionine sulfoxide reductase	Undefined	0.161831	0.790938	0.210584	-0.451949	-1.44158			0.0672154	1.17253	0.0700933	0.200072	1.88136			0.00198901	2.70136	0.0351324	-0.796661	-3.19572	+	+	0.256686	0.590597	0.346844	-0.223408	-1.14105			11.5415	11.1926	NaN	NaN	11.1557	NaN	11.6762	10.5571	NaN	12.3596	11.9299	8.98767	11.9843	11.8666	10.8652	11.2056	10.5931	11.783
P41217	CD200	OX-2 membrane glycoprotein	Undefined	0.564002	0.24872	0.640452	0.176514	0.582443			0.140257	0.853076	0.149835	-0.457977	-1.49863			0.00259349	2.58612	0.0417904	-1.29467	-3.09405	+	+	0.950923	0.0218547	0.971037	-0.0235109	-0.0616885			16.8794	14.3922	14.9629	13.8302	13.7905	18.118	17.2412	14.7972	13.8484	15.009	17.9737	17.7835	13.3152	NaN	14.3158	13.2331	14.028	13.0604
O15372	EIF3H	Eukaryotic translation initiation factor 3 subunit H	Undefined	0.0542867	1.26531	0.073191	0.26993	1.9914			0.112472	0.948955	0.120235	-0.218779	-1.6145			0.00280237	2.55248	0.0438296	-0.649185	-3.0678	+	+	0.515974	0.287372	0.620438	-0.130974	-0.651613			12.4147	12.1754	12.5382	11.9309	12.0595	13.8211	12.689	11.9733	12.7271	13.6205	13.4153	13.0236	13.1715	11.9284	12.0097	12.9111	11.7875	13.2327
Q13835-2	PKP1	Plakophilin-1	Undefined	0.0412015	1.38509	0.056449	0.758318	2.13015			0.880963	0.0550423	0.894041	0.0349938	0.150583			0.00282661	2.54873	0.0439251	-1.02145	-3.06849	+	+	0.055924	1.2524	0.0935873	0.43686	1.93325			14.1757	13.8652	13.0851	14.5373	14.3816	13.6147	12.6608	15.4722	NaN	14.2382	13.5236	14.3094	13.0786	14.2482	15.0327	14.617	14.6773	NaN
P61353	RPL27	60S ribosomal protein L27	Ex	0.472812	0.325312	0.549508	-0.143817	-0.72576			0.111938	0.951022	0.119765	-0.216633	-1.62205			0.00298682	2.52479	0.0456853	-0.643916	-3.04937	+	+	0.479028	0.319639	0.582939	-0.141392	-0.710357			11.4644	11.4488	11.6164	13.6117	8.85383	13.7729	13.2841	13.0957	12.7223	13.0242	13.6601	12.4275	13.6419	13.4386	12.9592	13.1129	12.9851	13.3112
P09488	GSTM1	Glutathione S-transferase Mu 1	Undefined	0.908425	0.0417111	0.930586	-0.0309538	-0.116197			0.763104	0.117416	0.783804	-0.0751567	-0.30391			0.00322256	2.4918	0.047949	-0.743092	-3.05237	+	+	0.207733	0.682494	0.292563	-0.402945	-1.26997			12.3061	14.2363	NaN	NaN	13.5129	13.5898	10.5048	9.53699	11.3128	12.8915	14.1237	NaN	NaN	12.4771	NaN	NaN	12.1614	12.6987
P01023	A2M	Alpha-2-macroglobulin	End	0.270468	0.567884	0.336993	0.070631	1.1197			0.00366924	2.43542	0.00302664	0.111943	3.04286		+	2.70733e-06	5.56746	0.000292994	0.407909	4.98837		+	0.00154355	2.81148	0.00344652	0.242273	3.24536		+	14.7949	14.6571	15.3287	15.3788	15.186	15.1916	14.8448	15.0076	15.2887	14.8983	14.7566	14.5667	15.101	15.2896	14.2064	14.7034	15.2401	14.632
A8K2U0	A2ML1	Alpha-2-macroglobulin-like protein 1	Undefined	0.766763	0.115339	0.815136	-0.108071	-0.300679			0.992653	0.00320253	0.99327	0.00515393	0.00927236			0.0787979	1.10349	0.293166	-0.481049	-1.78199			0.389148	0.409885	0.492354	-0.359629	-0.86535			17.3504	15.1066	NaN	15.6626	15.7256	NaN	NaN	15.101	NaN	13.645	15.1438	14.8655	17.1393	NaN	16.7997	13.9556	12.8125	3.83952
Q2M2I8	AAK1	AP2-associated protein kinase 1	Undefined	0.00229251	2.63969	0.00306943	-0.0935136	-3.28975		+	1.66138e-05	4.77953	4.5977e-06	-0.119827	-4.74637		+	0.0976984	1.01011	0.3264	-0.066397	-1.67242			2.5011e-16	15.6019	0	-0.420147	-9.60485		+	15.0552	14.9938	14.5096	14.7972	14.2812	14.5594	14.9531	14.6661	14.7461	14.3749	14.4928	15.166	14.6663	14.9091	15.139	14.4239	14.6266	14.2258
P49588	AARS1	Alanine--tRNA ligase, cytoplasmic	Undefined	0.0114252	1.94214	0.0152481	-0.0769624	-2.67001		+	0.00142644	2.84575	0.00108438	-0.0576517	-3.36925		+	9.67393e-11	10.0144	0	0.324046	7.26897		+	0.0514908	1.28827	0.0869564	0.0763133	1.96823			16.4533	16.3642	16.2748	16.1382	16.2208	16.3427	16.2457	16.248	16.1888	16.3793	16.2478	16.1486	16.434	16.4086	16.2317	16.202	16.24	16.094
Q9BTE6	AARSD1	Alanyl-tRNA editing protein Aarsd1	Undefined	0.175025	0.7569	0.22578	-0.059103	-1.38432			0.289133	0.538902	0.304452	-0.048323	-1.07118			0.101248	0.994614	0.333191	0.101526	1.65489			0.00677873	2.16885	0.0134475	0.160514	2.75923		+	14.1059	14.1791	14.3256	13.9983	13.8793	14.2493	14.2677	14.1815	14.0002	14.0473	14.1343	14.413	14.1962	14.1054	13.7394	13.724	13.9213	14.2683
Q9NRN7	AASDHPPT	L-aminoadipate-semialdehyde dehydrogenase-phosphopantetheinyl transferase	Undefined	0.166295	0.77912	0.215529	-0.0678046	-1.41366			0.0214702	1.66816	0.0202024	-0.104102	-2.37119		+	0.308734	0.510415	0.5763	-0.0654371	-1.02331			9.83051e-06	5.00742	3.03605e-05	-0.268151	-4.63007		+	14.1378	14.5578	13.9785	13.8032	13.8256	14.1183	14.2108	13.9025	13.9951	13.7846	14.2006	14.1236	14.2102	14.2015	14.0828	14.1527	13.9363	14.2446
P80404	ABAT	4-aminobutyrate aminotransferase, mitochondrial	Undefined	0.87073	0.0601165	0.900583	0.00488459	0.163929			0.0820783	1.08577	0.0871017	0.0476644	1.77304			0.990826	0.00400254	0.996671	-0.000390908	-0.0115279			7.61128e-09	8.11854	0	-0.213969	-6.24636		+	16.2306	15.9796	15.5189	15.7328	15.5365	15.7225	15.5322	15.8015	15.9238	15.7662	15.6194	15.8643	15.6988	15.9042	15.8112	15.6258	15.7213	15.6008
Q9NUJ1	ABHD10	Palmitoyl-protein thioesterase ABHD10, mitochondrial	Undefined	0.14004	0.853747	0.183764	-0.0703947	-1.50992			0.0770579	1.11318	0.081679	-0.0776773	-1.80379			0.0522603	1.28183	0.238016	0.151318	1.96538			0.0009536	3.02063	0.0021574	0.202727	3.39309		+	14.0702	14.4441	14.0583	13.3947	13.947	14.2821	14.1855	13.7574	13.8259	13.9116	13.8276	14.1315	14.1339	13.8497	13.82	13.7782	13.7913	13.3457
Q8NFV4	ABHD11	Protein ABHD11	Undefined	0.316489	0.499642	0.386037	0.0979403	1.01624			3.72957e-06	5.42834	0	0.323553	5.17449		+	0.00023351	3.63169	0.0080616	-0.359648	-3.82388		+	0.497845	0.302906	0.601525	0.0537415	0.68008			12.8058	12.3871	12.2359	11.8189	12.3785	12.527	12.3193	12.7197	12.4789	12.5054	12.6114	12.7742	12.7545	12.4034	12.6648	12.405	12.6907	12.4266
Q8IZP0	ABI1	Abl interactor 1	Undefined	0.971461	0.0125748	0.979242	-0.00196388	-0.0360333			0.0630067	1.20061	0.065269	0.0897768	1.89984			6.75304e-06	5.1705	0.000504348	0.331201	4.76312		+	0.977661	0.00981174	0.988451	0.00224367	0.0280636			15.3275	15.3097	15.0362	15.1135	14.9233	15.1665	15.0703	14.8162	14.8429	15.0116	15.1809	15.1631	15.0303	15.3973	15.1138	14.8903	15.1012	15.0096
Q9NYB9	ABI2	Abl interactor 2	Ex	0.023372	1.6313	0.0318176	-0.104104	-2.37107		+	0.0606538	1.21714	0.0628082	-0.060407	-1.91766			7.48551e-07	6.12578	0.00011194	0.326404	5.29656		+	0.000323198	3.49053	0.00078803	-0.219265	-3.70992		+	15.4787	15.7026	15.0951	15.0504	14.934	15.2935	15.4437	14.9503	15.0548	14.9128	15.1436	15.2584	15.2605	15.0143	15.1744	14.9488	14.9611	14.9279
P42684	ABL2	Tyrosine-protein kinase ABL2	Undefined	0.0136889	1.86363	0.0182342	-0.186237	-2.59616		+	0.280009	0.552828	0.295255	-0.181005	-1.09213			0.000209401	3.67902	0.00754946	0.350844	3.85477		+	0.167342	0.776395	0.243113	0.11329	1.38973			12.7081	12.6945	12.1519	12.3506	12.4348	12.2342	12.2708	12.1044	12.4773	12.3707	12.3599	12.7755	12.3732	12.1236	12.065	12.2026	12.8644	12.3654
O14639	ABLIM1	Actin-binding LIM protein 1	Ast	0.0866031	1.06247	0.115328	0.0710881	1.76316			0.0251931	1.59872	0.0242935	0.0593601	2.30495		+	0.00118805	2.92517	0.0253525	0.251269	3.3416		+	0.0240766	1.61841	0.0428427	0.143837	2.28669		+	14.5813	14.4625	14.0165	14.2562	13.5953	14.2637	14.3118	13.7927	14.1719	14.1654	14.7251	14.5599	13.9686	14.3094	14.0181	14.1678	13.8382	13.9812
Q6H8Q1-2	ABLIM2	Actin-binding LIM protein 2	Neuron	2.57702e-05	4.58888	2.8777e-05	-0.235761	-4.8428		+	2.49523e-05	4.60289	4.43951e-06	-0.168569	-4.62776		+	0.131927	0.879665	0.381094	0.093579	1.51948			8.48725e-12	11.0712	0	-0.467551	-7.61939		+	15.6298	15.4441	14.7124	15.0593	14.8099	15.0344	15.2178	15.054	15.0036	14.7584	15.0283	15.5642	14.9494	14.7773	15.1719	14.7776	15.1187	14.4866
Q12979	ABR	Active breakpoint cluster region-related protein	Undefined	0.000926715	3.03305	0.00129248	-0.119199	-3.61833		+	0.00127007	2.89617	0.000947119	-0.0790131	-3.4082		+	0.604925	0.218298	0.792431	-0.0230726	-0.519043			4.18193e-06	5.37862	1.70576e-05	-0.194443	-4.83798		+	13.9818	13.9005	13.9	13.8519	13.8371	13.897	13.9329	14.0618	13.8975	13.992	13.9479	14.1518	13.8764	13.9914	13.9876	13.7892	13.819	13.888
Q15018	ABRAXAS2	BRISC complex subunit Abraxas 2	Undefined	0.611743	0.213431	0.683247	-0.0236933	-0.512178			0.0611704	1.21346	0.0632628	-0.0872645	-1.9137			1.08932e-06	5.96284	0.000171429	0.259155	5.20757		+	0.566271	0.246976	0.669416	-0.0247185	-0.575242			13.935	13.7441	13.0785	13.3034	13.1842	13.4021	13.5785	13.5494	13.3014	13.4631	13.3972	13.4037	13.4332	13.5406	13.651	13.3638	13.0951	13.0708
P09110	ACAA1	3-ketoacyl-CoA thiolase, peroxisomal	Undefined	5.21712e-05	4.28257	4.24628e-05	0.201467	4.60759		+	2.92632e-10	9.53368	0	0.286074	7.77167		+	0.00222068	2.65351	0.0378694	-0.167333	-3.1436		+	0.197399	0.704655	0.280622	-0.0613833	-1.29663			14.3491	13.8408	13.8125	14.2032	14.1234	13.8784	14.1644	14.0775	14.2659	13.8605	14.0954	14.0351	13.9761	13.9387	13.528	14.1012	13.9139	14.0274
P42765	ACAA2	3-ketoacyl-CoA thiolase, mitochondrial	Undefined	6.94302e-06	5.15845	0	0.211566	5.27664		+	2.61273e-18	17.5829	0	0.335642	13.2577		+	0.000703981	3.15244	0.0177936	0.218547	3.50143		+	0.0576091	1.23951	0.0960563	0.1116	1.9182			15.0441	14.3086	14.0727	14.429	14.6732	14.6834	14.4187	14.6788	14.8106	14.8731	14.887	14.854	14.7534	14.6854	14.3391	14.2915	14.358	14.7255
Q13085	ACACA	Acetyl-CoA carboxylase 1	Undefined	0.132099	0.879101	0.173965	-0.0354964	-1.54187			0.0655037	1.18373	0.0682962	0.0368519	1.88153			0.23188	0.634736	0.50147	0.041854	1.20314			5.63946e-08	7.24876	0	-0.165061	-5.81838		+	14.0764	14.2994	14.1211	14.0866	13.9756	14.0296	14.1767	14.0837	14.194	14.1293	14.1176	14.2342	14.117	14.0119	14.0086	13.9928	13.9316	14.0303
Q9UKU7	ACAD8	Isobutyryl-CoA dehydrogenase, mitochondrial	Undefined	0.0403323	1.39435	0.0552797	0.128274	2.12938			0.2621	0.581534	0.276622	0.0431705	1.13375			1.37094e-07	6.86298	8.88889e-06	-0.474009	-5.69067		+	0.0274363	1.56167	0.0485677	-0.176907	-2.23422		+	15.325	15.1861	15.0585	15.076	15.0572	15.1708	15.0245	14.8618	14.7883	15.0006	15.3493	14.8904	15.3405	15.357	14.6777	15.1343	14.7678	15.3516
Q9H845	ACAD9	Complex I assembly factor ACAD9, mitochondrial	Undefined	0.181345	0.741494	0.234116	0.0926163	1.36378			0.220954	0.655699	0.233352	0.0587725	1.23888			0.0084225	2.07456	0.0854692	-0.195892	-2.69021			0.477809	0.320745	0.581635	-0.0376799	-0.712199			14.4365	14.245	14.265	14.3857	14.5218	14.2918	14.1922	14.166	14.2629	14.5819	14.2909	14.0601	14.211	14.1941	14.4447	14.1256	14.4505	14.3923
P11310	ACADM	Medium-chain specific acyl-CoA dehydrogenase, mitochondrial	Undefined	1.55569e-07	6.80808	0	0.345935	6.53034		+	8.66145e-17	16.0624	0	0.329496	12.1338		+	0.197095	0.705323	0.462367	-0.101814	-1.29888			0.00374382	2.42669	0.00787402	0.172322	2.96047		+	14.2542	14.0781	13.9606	14.0697	14.2634	14.0554	13.5745	14.1676	14.3092	14.5582	14.614	13.4944	14.5487	14.5818	13.8669	13.8411	14.0933	14.5567
P16219	ACADS	Short-chain specific acyl-CoA dehydrogenase, mitochondrial	Undefined	0.00631669	2.19951	0.00796323	0.345499	2.92959		+	0.511651	0.291026	0.528627	-0.449045	-0.663918			0.561888	0.25035	0.763743	-0.0736961	-0.582988			0.163347	0.786888	0.238525	-0.462647	-1.40893			14.2431	14.1815	NaN	15.1555	10.5935	14.3752	13.993	15.0231	14.3464	9.96134	10.8654	7.20283	14.6912	14.4134	14.4244	NaN	NaN	13.9648
P45954	ACADSB	Short/branched chain specific acyl-CoA dehydrogenase, mitochondrial	Undefined	0.320361	0.49436	0.390008	-0.0892367	-1.00802			0.0507651	1.29443	0.0520154	0.0979474	1.99974			0.969596	0.0134092	0.986964	0.00364614	0.0382146			0.950742	0.0219375	0.971151	-0.00499679	-0.0619129			13.7433	13.8181	13.4109	14.5026	13.3038	13.0264	13.3871	13.8273	13.7332	13.9697	13.7136	13.0026	13.3151	13.6268	14.0961	13.1641	13.7325	13.4848
P49748	ACADVL	Very long-chain specific acyl-CoA dehydrogenase, mitochondrial	Undefined	1.67103e-08	7.77702	0	0.262658	7.2795		+	4.69912e-20	19.328	0	0.387908	14.6162		+	0.983241	0.00734009	0.993536	0.00126882	0.0210608			0.00578083	2.23801	0.0115914	0.1613	2.81353		+	14.9381	14.6079	13.9492	14.5651	15.1128	14.4708	14.4864	14.8123	14.4372	14.7688	14.929	14.1583	14.5978	14.9338	14.5553	14.4413	14.3956	15.1816
P16112	ACAN	Aggrecan core protein	Undefined	0.0243716	1.61312	0.0330419	0.220584	2.35299		+	0.0204731	1.68882	0.0192529	0.128061	2.39216		+	0.0837745	1.07689	0.302655	0.213773	1.74735			0.00565758	2.24737	0.0113757	0.28477	2.82143		+	14.0217	13.4635	13.1012	13.6525	12.9677	13.5443	12.8337	13.4832	13.3238	13.5522	13.0649	13.1879	13.2496	13.4678	13.2922	12.8814	13.3798	13.1187
P24752	ACAT1	Acetyl-CoA acetyltransferase, mitochondrial	Undefined	0.000626484	3.20309	0.000894188	0.147634	3.75707		+	6.76386e-07	6.16981	0	0.140755	5.6529		+	7.99665e-05	4.09709	0.00356284	0.26711	4.12131		+	0.429043	0.367499	0.533343	0.0408729	0.793684			16.2698	16.059	15.4741	15.3786	15.5575	15.7089	15.7849	15.4676	15.8224	15.6759	15.9642	15.4063	15.9334	15.9991	15.7143	15.7993	15.7591	15.846
Q9BWD1	ACAT2	Acetyl-CoA acetyltransferase, cytosolic	Undefined	0.00178975	2.74721	0.0023609	-0.110937	-3.38075		+	0.000159641	3.79686	0.000107589	-0.12844	-4.07154		+	0.421071	0.375644	0.666984	0.0451244	0.808029			0.834942	0.0783439	0.889046	-0.00970561	-0.20885			14.4304	14.1974	14.3628	14.1878	13.9687	14.5624	13.8419	14.1505	13.7975	14.0354	14.1681	13.6949	14.327	14.1202	13.8667	14.1261	14.0386	14.0836
Q8N6N7	ACBD7	Acyl-CoA-binding domain-containing protein 7	Undefined	0.0650233	1.18693	0.0874097	0.0894692	1.905			9.48107e-06	5.02314	4.84262e-06	0.176859	4.9084		+	0.147943	0.829905	0.401573	-0.122563	-1.45859			0.0192378	1.71584	0.0351393	0.209177	2.37491		+	14.3653	14.3488	14.8507	13.7569	13.8239	14.1392	14.5426	14.3011	14.1125	13.9332	15.0064	13.9998	14.2986	14.4885	13.8024	14.2728	14.5037	14.5504
P53396	ACLY	ATP-citrate synthase	Undefined	0.0470737	1.32722	0.0639604	-0.0467853	-2.05823			3.13109e-08	7.5043	0	-0.109134	-6.49733		+	7.17984e-15	14.1439	0	0.286314	9.21641		+	0.544328	0.264139	0.647407	0.0162165	0.608121			15.5533	15.1982	15.3553	15.3423	15.026	15.3515	15.1531	15.0945	15.2165	15.2912	15.0958	15.0693	15.3742	15.3627	15.0748	15.239	15.2381	15.0261
P21399	ACO1	Cytoplasmic aconitate hydratase	Undefined	0.82655	0.0827307	0.864999	0.0516637	0.220775			0.169738	0.770222	0.180521	0.0525812	1.39237			0.955449	0.0197924	0.979737	0.0140901	0.0560113			0.0803851	1.09482	0.128309	0.283541	1.76429			13.0187	12.8235	12.9754	12.6522	12.9001	12.8991	13.022	12.6657	12.8344	12.8125	12.8479	12.7208	13.0384	12.7278	11.9862	12.4472	12.9734	13.168
Q99798	ACO2	Aconitate hydratase, mitochondrial	Undefined	0.00426126	2.37046	0.00552062	0.0952703	3.05724		+	1.43008e-06	5.84464	0	0.110094	5.44424		+	0.237362	0.62459	0.507592	0.0557834	1.18903			2.51825e-09	8.5989	0	-0.266203	-6.47714		+	17.7927	18.0815	17.5233	17.4185	17.2304	17.4952	17.7036	17.3076	17.7698	17.3928	17.4978	17.9383	17.5849	17.6916	17.8275	17.5829	17.6918	17.4254
Q86TX2	ACOT1	Acyl-coenzyme A thioesterase 1	Undefined	0.00414621	2.38235	0.00536313	0.118038	3.06766		+	6.13803e-09	8.21197	0	0.187492	6.94134		+	0.233508	0.631698	0.503416	0.109235	1.19892			0.0306994	1.51287	0.0538428	0.189908	2.18839			16.0369	15.519	15.6384	15.8335	15.63	15.5948	15.5675	15.6087	15.6236	15.2664	15.8266	14.5376	15.2131	15.7918	14.6614	15.2368	15.5062	15.2831
Q9NPJ3	ACOT13	Acyl-coenzyme A thioesterase 13	Undefined	0.000367957	3.4342	0.000624799	0.142704	3.94309		+	1.70901e-08	7.76726	0	0.141674	6.66243		+	1.47596e-06	5.83093	0.00019211	0.385444	5.13497		+	0.435084	0.361427	0.538479	-0.0507742	-0.78331			15.2707	15.5536	15.6584	15.2739	15.2859	15.3951	15.4439	15.2278	15.4278	15.2076	15.2513	15.6151	15.4685	15.2565	15.3019	14.3391	15.238	15.1123
O00154-4	ACOT7	Cytosolic acyl coenzyme A thioester hydrolase	Undefined	0.0416605	1.38028	0.0570885	-0.067897	-2.11458			1.5522e-05	4.80905	4.64576e-06	-0.125951	-4.76609		+	0.000378135	3.42235	0.011587	0.127972	3.68527		+	8.16219e-09	8.08819	0	-0.195299	-6.23165		+	16.6972	16.6379	16.6846	16.3575	16.3346	16.5665	16.7191	16.3658	16.5385	16.3091	16.5316	16.6041	16.6968	16.4572	16.5125	16.6185	16.5681	16.3877
Q9Y305	ACOT9	Acyl-coenzyme A thioesterase 9, mitochondrial	Undefined	0.0138329	1.85909	0.018554	0.102319	2.59185		+	0.0010596	2.97486	0.000819936	0.0842742	3.46853		+	0.485939	0.313418	0.713321	-0.0338342	-0.699487			0.702606	0.153288	0.784455	0.0160673	0.382775			14.8557	14.9409	14.998	14.7652	14.8439	14.6778	14.7651	14.7317	14.7741	14.8021	14.6089	14.8555	14.7345	14.7502	14.6184	14.5831	14.8854	14.6831
P24666	ACP1	Low molecular weight phosphotyrosine protein phosphatase	Undefined	0.121217	0.916437	0.159856	-0.0646257	-1.58828			0.000425548	3.37105	0.0003034	-0.109574	-3.7648		+	0.00631501	2.19963	0.0724751	0.165598	2.79237			0.302432	0.519372	0.398191	-0.0568088	-1.03596			15.0783	15.0689	14.9461	15.0538	14.9128	14.9177	15.0281	14.9676	14.8157	14.76	14.5728	15.0486	14.8764	14.715	14.5428	15.0743	14.9704	14.542
P11117	ACP2	Lysosomal acid phosphatase	Undefined	0.0418719	1.37808	0.0574832	0.578717	2.20064			0.469539	0.328328	0.489573	0.468106	0.734398			0.706474	0.150904	0.851646	0.100904	0.378594			0.654324	0.184207	0.743059	0.213834	0.449904			14.3822	14.5302	NaN	15.3793	NaN	NaN	14.4591	10.1381	NaN	12.2856	11.7663	11.1772	NaN	11.998	9.51868	11.7076	9.79548	10.3916
Q4G176	ACSF3	Malonate--CoA ligase ACSF3, mitochondrial	Undefined	0.000895794	3.04779	0.0012605	0.15387	3.63042		+	0.0363025	1.44006	0.036112	0.0699444	2.14909		+	0.034313	1.46454	0.190886	0.233377	2.14699			0.668131	0.175138	0.754252	0.0383779	0.429839			13.8548	13.5529	13.6407	13.5847	13.3191	13.203	13.2099	13.4058	13.9844	13.8199	13.0644	13.3537	13.3777	13.1129	13.3981	13.4363	13.7818	13.332
O95573	ACSL3	Fatty acid CoA ligase Acsl3	Undefined	0.819582	0.0864075	0.859792	-0.0188591	-0.229804			0.0103672	1.98434	0.0094401	-0.127635	-2.65992		+	0.020232	1.69396	0.14273	-0.212682	-2.36129			0.136247	0.865674	0.202895	-0.101259	-1.5006			13.8424	13.7215	12.7212	13.135	13.2321	13.3151	13.7002	13.7184	13.2549	13.3738	13.0825	13.6932	12.9389	13.437	13.1952	13.1265	13.6671	13.2037
Q9UKU0	ACSL6	Long-chain-fatty-acid--CoA ligase 6	Undefined	0.242364	0.615532	0.306329	-0.0522621	-1.18921			0.0350473	1.45534	0.0347544	-0.0760611	-2.1644		+	0.096362	1.01609	0.323968	-0.10758	-1.67922			0.476959	0.321519	0.580789	0.0391361	0.713579			13.3463	13.5526	12.9863	12.9473	13.0568	13.2904	13.2717	13.0015	13.3575	13.2321	13.1821	12.9426	13.3823	13.4462	13.1149	13.0806	13.2851	13.3584
Q9NUB1	ACSS1	Acetyl-coenzyme A synthetase 2-like, mitochondrial	Ast	7.54546e-05	4.12231	8.08081e-05	0.274536	4.48376		+	5.03079e-06	5.29836	5.04414e-06	0.245591	5.08956		+	0.151655	0.819143	0.406083	-0.104416	-1.44521			0.738386	0.131716	0.814573	-0.023823	-0.334814			14.1662	14.0691	13.3307	13.6939	13.5001	13.6505	13.584	13.4895	14.1338	14.3649	14.3078	13.9135	12.9657	14.1169	14.0646	13.9916	13.5747	13.9353
P62736	ACTA2	Actin, aortic smooth muscle	Undefined	0.363162	0.4399	0.43651	-0.0625347	-0.921376			0.547421	0.261678	0.566103	-0.0208575	-0.60559			0.0061411	2.21175	0.0715778	-0.180392	-2.80214			0.0035245	2.4529	0.00745167	-0.175095	-2.98048		+	18.5567	18.5178	17.9938	17.8867	18.2085	18.3333	18.4004	18.3874	18.1911	17.9537	18.1592	18.1997	18.3451	18.5919	18.6885	18.414	18.3174	17.8616
P60709	ACTB	Actin, cytoplasmic 1	Undefined	0.554063	0.256441	0.630289	-0.022302	-0.597435			0.185895	0.730732	0.19705	0.0289092	1.34055			3.18986e-07	6.49623	2.43902e-05	-0.290961	-5.49625		+	8.0216e-08	7.09574	0	-0.275975	-5.74154		+	22.0696	22.1458	21.6484	21.5672	21.7559	21.875	21.9167	21.6914	21.7466	21.6113	21.7313	21.7315	21.8329	21.8531	21.7966	21.8538	21.7623	21.5114
Q562R1	ACTBL2	Beta-actin-like protein 2	Undefined	0.77288	0.111888	0.82079	0.0174629	0.290853			0.0934918	1.02923	0.0993882	0.0597013	1.70858			0.7723	0.112214	0.886961	-0.0173871	-0.290186			0.000126919	3.89647	0.000333805	-0.192072	-3.96958		+	21.1011	21.3474	20.8106	20.6164	20.7551	21.1138	21.1018	20.7256	20.7118	20.7982	21.0445	20.9842	21.2252	21.2469	21.2135	21.2147	21.0936	20.9257
P12814-3	ACTN1	Alpha-actinin-1	Undefined	0.00398338	2.39975	0.00520179	-0.0808653	-3.08288		+	0.000118404	3.92663	7.83546e-05	-0.111701	-4.16303		+	0.00328531	2.48342	0.0485314	0.109886	3.01525		+	1.42779e-18	17.8453	0	-0.411931	-10.5693		+	16.5614	16.7715	16.5583	16.3119	16.469	16.4462	16.6226	16.4344	16.3595	16.1006	16.4064	16.3784	16.5272	16.3768	16.8241	16.2677	16.4213	16.0926
P35609	ACTN2	Alpha-actinin-2	Undefined	0.00108039	2.96642	0.00146883	-0.110014	-3.56346		+	2.59343e-10	9.58613	0	-0.267611	-7.80475		+	0.102107	0.990946	0.334459	-0.0653217	-1.65051			3.34784e-20	19.4752	0	-0.561088	-11.2701		+	14.4309	14.8029	14.6008	14.617	14.1123	14.52	15.0508	14.6589	14.59	13.9739	14.3302	14.799	14.5385	14.3106	14.9946	14.3693	14.5497	13.9038
Q08043	ACTN3	Alpha-actinin-3	Undefined	1	0	0.98712	1.65957	0			1	0	1	NaN	0			0.83915	0.0761602	0.921708	-0.167952	-0.204541			0.960421	0.0175385	0.977903	0.0430719	0.0499927			NaN	NaN	NaN	NaN	NaN	NaN	NaN	NaN	NaN	NaN	NaN	NaN	NaN	NaN	NaN	NaN	NaN	NaN
O43707	ACTN4	Alpha-actinin-4	Undefined	0.129217	0.888682	0.170117	0.0430329	1.55385			0.825661	0.0831981	0.845504	0.00450946	0.221383			0.0967467	1.01436	0.324544	0.0604291	1.67725			1.50091e-16	15.8236	0	-0.311062	-9.70039		+	14.5131	14.4486	14.2791	14.1911	14.2283	14.5117	14.545	14.2806	14.4401	14.2654	14.4394	14.1811	14.5314	14.525	14.9256	14.5008	14.445	14.2059
Q9NZ32	ACTR10	Actin-related protein 10	Undefined	0.23508	0.628784	0.2989	-0.0723032	-1.20818			0.785861	0.104654	0.806111	0.0112049	0.273097			0.00905718	2.04301	0.0894726	-0.181329	-2.66401			0.137658	0.861198	0.204744	-0.0793662	-1.49517			12.3737	13.4946	13.1436	12.9814	13.0084	13.2861	13.2625	13.0675	13.0122	12.927	12.7965	13.0257	13.0849	12.8787	12.6193	12.8409	12.7283	12.8653
P61163	ACTR1A	Alpha-centractin	Undefined	0.52823	0.277177	0.60532	-0.0633922	-0.637061			0.631727	0.199471	0.650757	0.0191335	0.482145			2.69953e-09	8.56871	0	-0.505456	-6.56145		+	4.11613e-06	5.38551	1.7094e-05	-0.369624	-4.84178		+	13.6769	14.0826	13.2466	13.7018	13.774	13.5612	13.5381	13.702	13.6833	13.8103	13.7022	13.5333	13.722	13.6838	13.9192	13.9319	13.6314	13.5267
P42025	ACTR1B	Beta-centractin	Undefined	0.61827	0.208822	0.689135	-0.0143566	-0.502777			0.642517	0.192115	0.661112	0.0130803	0.466906			0.0597619	1.22358	0.254393	0.0968344	1.90509			0.297106	0.527089	0.392386	-0.0399794	-1.0475			17.0786	17.1451	16.6685	16.4235	16.3541	16.7338	16.6432	16.2608	16.6464	16.7423	16.588	16.3376	16.7557	16.7927	16.6046	16.9744	16.5065	16.8464
P61160	ACTR2	Actin-related protein 2	Ex	0.724772	0.139798	0.782422	-0.012703	-0.35493			0.00304429	2.51651	0.00244347	0.13622	3.10881		+	6.07807e-06	5.21623	0.000468521	0.295348	4.78936		+	0.127936	0.893009	0.192625	-0.110818	-1.53355			16.0022	16.126	16.0562	15.3954	16.1835	16.069	15.7104	15.649	15.6854	15.7061	15.8498	15.7544	16.0409	15.9339	15.9604	15.6798	15.6989	15.8644
P61158	ACTR3	Actin-related protein 3	Undefined	0.3991	0.398918	0.475212	0.0300743	0.853657			4.57509e-06	5.3396	0	0.150681	5.11654		+	0.225853	0.646174	0.493796	0.0438712	1.21894			0.0151481	1.81964	0.0279462	-0.0879267	-2.46643		+	15.3141	15.3676	15.093	15.1695	15.2689	15.3575	15.092	14.9343	14.9548	14.9591	15.0815	15.0332	15.1891	15.2205	15.2163	15.0486	15.1327	15.0167
Q9P1U1	ACTR3B	Actin-related protein 3B	Undefined	0.000154681	3.81056	0.000162963	-0.132643	-4.24085		+	0.0955066	1.01997	0.10153	-0.0478315	-1.69789			5.95969e-08	7.22478	9.73236e-06	0.255456	5.87963		+	0.00153567	2.8137	0.00342576	-0.144306	-3.24695		+	16.1181	16.3418	16.227	15.872	16.1174	16.1452	16.0378	15.9025	15.9552	15.7955	16.0424	16.0371	16.3221	16.1072	15.9874	16.0241	15.9194	16.0689
P07311	ACYP1	Acylphosphatase-1	Undefined	0.00540501	2.2672	0.00686079	-0.182382	-2.96603		+	3.35002e-05	4.47495	8.66739e-06	-0.197557	-4.54121		+	0.540248	0.267407	0.749976	0.0618366	0.614638			0.007756	2.11036	0.0152839	0.216412	2.71097		+	13.5053	13.698	13.4751	12.9947	13.177	13.55	13.4132	13.0293	13.4338	12.9222	13.2313	13.0367	13.6891	13.2424	13.0572	13.025	13.1977	13.1864
P14621	ACYP2	Acylphosphatase-2	Undefined	0.249275	0.60332	0.314402	0.0719259	1.17159			4.32588e-06	5.36393	0	0.172941	5.13244		+	6.56844e-06	5.18254	0.000493469	0.338879	4.77004		+	2.00385e-05	4.69814	5.55556e-05	0.257572	4.45244		+	15.3078	15.1363	14.9031	14.8611	15.1611	14.9703	15.1426	14.92	15.0599	15.3987	15.691	14.7364	15.3133	15.3077	14.9265	15.2677	14.9674	15.2377
O14672	ADAM10	Disintegrin and metalloproteinase domain-containing protein 10	Undefined	0.614903	0.211193	0.686398	0.12442	0.510678			0.789488	0.102655	0.809349	0.0532198	0.269222			0.0854096	1.06849	0.305315	-0.483875	-1.74479			0.309179	0.50979	0.406477	-0.239133	-1.02314			10.6826	10.5954	NaN	13.274	12.1701	10.6007	9.6746	11.9609	9.60935	12.3	10.6932	10.3765	10.1016	10.3878	7.36556	12.4424	11.9252	10.7382
Q9P0K1	ADAM22	Disintegrin and metalloproteinase domain-containing protein 22	In	3.55634e-10	9.449	0	-0.353456	-8.6194		+	9.82843e-13	12.0075	0	-0.35859	-9.3562		+	0.0222124	1.65341	0.14981	0.134651	2.3244			0.189221	0.723031	0.271379	-0.0692461	-1.32085			14.3929	14.1996	13.49	13.8751	13.8197	14.493	14.3769	14.2606	14.0209	13.8673	13.5914	13.7652	14.09	14.1606	14.06	13.8036	13.5461	14.0752
O75077	ADAM23	Disintegrin and metalloproteinase domain-containing protein 23	Undefined	0.000251991	3.59861	0.000483816	-0.224285	-4.07387		+	6.07923e-07	6.21615	0	-0.270645	-5.68251		+	0.960975	0.0172881	0.983182	-0.00239097	-0.0490584			0.653418	0.184809	0.742298	0.0182868	0.450214			14.842	14.7685	14.6731	14.5254	14.2875	14.7375	14.8942	14.5948	14.7387	14.4522	14.1377	14.7032	14.6681	14.7169	14.1649	14.421	14.562	14.343
O75689	ADAP1	Arf-GAP with dual PH domain-containing protein 1	Undefined	0.0198331	1.70261	0.0270134	-0.200453	-2.44128		+	4.05339e-05	4.39218	1.70213e-05	-0.183885	-4.4849		+	0.000378119	3.42237	0.0115975	-0.213458	-3.68528		+	0.36754	0.434696	0.469138	-0.0477908	-0.904718			13.635	13.6929	13.7386	13.3154	13.3001	13.6568	13.5005	13.3658	13.5198	13.4937	13.7672	13.764	13.5292	13.5807	13.4713	13.7265	13.4859	13.3893
P55265	ADAR	Double-stranded RNA-specific adenosine deaminase	Undefined	0.120734	0.91817	0.159619	0.0868163	1.59158			0.668904	0.174636	0.688841	-0.0333797	-0.430355			0.347031	0.459632	0.607922	-0.0815589	-0.945152			0.104827	0.979525	0.16202	-0.137126	-1.63538			14.2189	13.5274	13.9398	13.6956	14.0669	14.4255	14.1987	13.8827	14.4481	14.3366	14.4532	14.4483	14.3603	14.1968	14.2538	14.0838	14.2754	14.2267
Q08828	ADCY1	Adenylate cyclase type 1	Neuron	0.00291696	2.53507	0.00386433	-0.472482	-3.21477		+	1.53077e-06	5.81509	0	-0.485833	-5.53326		+	0.0769437	1.11383	0.289685	-0.243983	-1.78813			0.00167944	2.77484	0.00371595	-0.399668	-3.22265		+	10.9299	11.2796	12.0679	11.2968	10.5297	12.1501	12.209	12.396	12.0029	11.8467	11.5909	12.9865	11.5461	12.2529	11.7169	11.7138	11.7166	11.3025
O95622	ADCY5	Adenylate cyclase type 5	Undefined	0.0539028	1.26839	0.0727522	-0.403024	-1.99476			0.000800865	3.09644	0.000574732	-0.295852	-3.56503		+	0.00335532	2.47427	0.0491811	-0.426754	-3.00824		+	0.00389353	2.40966	0.00810783	0.295517	2.94797		+	13.3222	13.5676	14.5914	13.7616	13.6899	13.9573	13.6459	12.9156	14.0549	13.782	13.9753	14.0691	13.958	13.8918	13.6997	14.1777	13.785	13.9943
P35611	ADD1	Alpha-adducin	Undefined	0.00123762	2.90741	0.0016	-0.0875597	-3.51462		+	0.0123712	1.90759	0.0112644	-0.0525028	-2.5916		+	1.99654e-12	11.6997	0	0.317337	8.07236		+	0.858434	0.0662932	0.904719	-0.0062203	-0.178776			16.6531	16.6006	16.2355	16.1574	15.7807	16.2063	16.1894	16.0174	16.1808	16.1514	16.4322	16.2839	16.1348	16.2978	16.2068	16.2034	16.0268	16.086
P35612	ADD2	Beta-adducin	Undefined	4.51141e-11	10.3457	0	-0.234315	-9.37102		+	6.86415e-18	17.1634	0	-0.276735	-12.9424		+	8.73149e-13	12.0589	0	0.200357	8.24161		+	2.68044e-11	10.5718	0	-0.176813	-7.3936		+	15.8695	15.8716	15.6811	15.5648	15.4947	15.699	15.6622	15.6496	15.5559	15.4132	15.5162	15.778	15.5801	15.5355	15.5627	15.6924	15.5278	15.3579
Q9UEY8	ADD3	Gamma-adducin	Ast	0.0253077	1.59675	0.0342646	0.0715033	2.33666		+	4.08275e-10	9.38905	0	0.181699	7.68051		+	6.72239e-05	4.17248	0.00304677	0.156809	4.16824		+	0.00215207	2.66714	0.00456767	0.12245	3.14062		+	16.7904	16.7916	16.4163	16.5389	16.2746	16.6464	16.3409	16.3553	16.6006	16.671	17.0522	16.3544	16.5762	16.71	16.2489	16.5509	16.3604	16.7282
O14514	ADGRB1	Adhesion G protein-coupled receptor B1	Undefined	0.984734	0.006681	0.988313	-0.0050924	-0.0194353			0.998134	0.000811126	0.997769	-0.000998285	-0.00241266			0.241464	0.617148	0.510842	-0.203286	-1.17998			0.221178	0.655258	0.307978	-0.219966	-1.23315			NaN	10.8538	9.61614	12.7125	NaN	10.4679	10.7997	NaN	11.0314	NaN	10.5592	NaN	NaN	NaN	11.6102	NaN	NaN	NaN
O94910	ADGRL1	Adhesion G protein-coupled receptor L1	Undefined	0.332302	0.478467	0.402408	-0.0427728	-0.983107			0.436397	0.360118	0.455163	-0.0256331	-0.784344			5.51901e-08	7.25814	9.82801e-06	-0.336377	-5.89692		+	0.00384553	2.41504	0.00804181	-0.166482	-2.95155		+	13.0852	13.2935	12.9465	13.3626	12.9756	12.9461	13.0167	13.0212	13.1611	12.9393	13.1259	13.4085	13.0162	13.0303	12.9021	12.8379	12.9991	12.7174
P11766	ADH5	Alcohol dehydrogenase class-3	Undefined	0.27738	0.556925	0.34425	0.0618507	1.10341			0.005222	2.28216	0.00442897	0.0941998	2.91598		+	0.00190748	2.71954	0.0343029	0.262109	3.19248		+	6.16035e-11	10.2104	0	0.46272	7.22886		+	14.598	14.5619	14.6028	13.94	14.4304	14.5402	14.3746	14.0885	14.4125	14.3358	14.7536	13.7587	14.591	14.5092	13.9052	14.5652	14.3536	14.7687
P40394	ADH7	All-trans-retinol dehydrogenase	Undefined	1	0	0.980275	NaN	0			1	0	1	NaN	0			1	0	0.99558	NaN	0			0.850288	0.0704339	0.899091	-0.117548	-0.205567			NaN	NaN	NaN	NaN	NaN	NaN	NaN	NaN	NaN	NaN	NaN	NaN	11.4943	NaN	12.5322	NaN	NaN	NaN
P55263	ADK	Adenosine kinase	In	0.0284272	1.54627	0.0385012	0.548439	2.2859		+	0.674776	0.17084	0.694809	0.104032	0.422297			0.261514	0.582506	0.531248	-0.272415	-1.12954			0.199166	0.700784	0.282726	0.287127	1.29171			11.0806	9.93685	11.6991	15.7935	14.1092	15.0603	14.889	14.2515	14.4147	14.2179	15.1792	12.7614	15.2425	15.0361	13.5349	13.8024	13.9111	13.915
Q6IQ32	ADNP2	Activity-dependent neuroprotector homeobox protein 2	Undefined	0.322614	0.491316	0.392069	0.333957	1.00415			0.283987	0.546702	0.299499	0.178284	1.08281			0.224063	0.64963	0.492105	-0.390051	-1.22452			0.130432	0.884616	0.195704	0.389908	1.52433			14.9648	15.0139	14.5821	14.2731	13.503	16.8737	17.6157	16.3179	15.9654	15.8876	16.2322	15.8297	15.9774	17.5278	18.6142	15.6232	15.6056	16.5152
Q96SZ5	ADO	2-aminoethanethiol dioxygenase	Undefined	0.45085	0.345968	0.527866	-0.0789485	-0.762788			0.000427953	3.3686	0.000303136	-0.222507	-3.763		+	0.0659254	1.18095	0.267099	0.269032	1.86038			0.11139	0.953154	0.170841	0.181453	1.60452			13.3705	13.2709	13.2695	13.097	12.9521	12.7998	12.7641	12.8825	13.2644	12.8297	12.9674	13.4276	12.9462	13.0463	12.7442	12.7207	12.9269	13.1267
Q9NX46	ADPRS	ADP-ribosylhydrolase ARH3	Undefined	0.138068	0.859906	0.181623	0.130683	1.51771			0.640685	0.193356	0.659399	0.0350866	0.469486			0.454715	0.342261	0.691888	0.0897609	0.750624			0.00618547	2.20863	0.0123497	0.304907	2.79016		+	14.0262	13.2539	13.7292	14.4054	14.2508	13.8259	13.6144	13.5817	12.922	13.8533	13.7231	13.4555	13.6537	13.6208	12.7299	13.8611	13.726	13.3332
Q16186	ADRM1	Proteasomal ubiquitin receptor ADRM1	Undefined	0.231242	0.635933	0.293997	0.0835542	1.21834			0.111333	0.953377	0.119195	-0.0573116	-1.61976			0.108588	0.964217	0.345121	-0.129459	-1.61965			0.0565749	1.24738	0.0945129	0.129007	1.92633			16.0472	15.6556	16.3752	15.4951	15.1094	15.3554	15.6057	15.6755	15.3067	15.4441	15.6067	15.6921	15.3518	15.0609	15.1152	15.3532	15.4379	15.5397
P30520	ADSS2	Adenylosuccinate synthetase isozyme 2	Undefined	0.606813	0.216945	0.678738	-0.0324981	-0.51931			0.0844408	1.07345	0.0896818	-0.0949808	-1.75912			0.00778113	2.10896	0.0817913	0.15497	2.71857			0.3374	0.471855	0.437766	0.0531319	0.963408			13.7259	14.2775	14.0841	14.4121	14.3686	14.3659	14.3741	14.6196	14.2639	14.348	14.206	14.2222	14.2423	14.1523	14.9831	14.1873	14.5104	13.8734
P55196	AFDN	Afadin	Undefined	0.308024	0.511416	0.377922	-0.0408592	-1.03444			0.170334	0.7687	0.181116	-0.0515351	-1.39039			1.05483e-10	9.97682	0	0.329822	7.25084		+	0.0212942	1.67174	0.0385873	-0.0962957	-2.33527		+	13.2911	13.8351	13.7317	13.901	13.2644	13.6819	13.6664	13.4481	13.3806	13.7273	13.828	13.8979	13.4724	13.5408	13.5073	13.6588	13.4607	13.5651
Q9Y4W6	AFG3L2	AFG3-like protein 2	Undefined	0.185616	0.731385	0.238454	0.0534742	1.35021			0.838122	0.0766929	0.857282	0.00409222	0.205323			0.700073	0.154856	0.848278	0.016949	0.386376			0.00246967	2.60736	0.00519705	-0.104397	-3.09652		+	14.6922	14.912	14.6302	14.7148	14.3471	14.5376	14.6387	14.6986	14.8481	14.5302	14.5785	14.6966	14.6226	14.6728	14.8234	14.5872	14.604	14.5429
Q9UPQ3	AGAP1	Arf-GAP with GTPase, ANK repeat and PH domain-containing protein 1	Undefined	0.497616	0.303106	0.575022	-0.0467624	-0.685384			0.786778	0.104148	0.806583	0.0215509	0.271897			0.0901343	1.04511	0.314234	0.111305	1.71195			0.112292	0.94965	0.172062	0.115461	1.60044			12.7934	13.6424	13.7688	13.9061	13.8012	13.6632	13.4671	13.7326	13.4231	13.6129	13.5105	13.529	13.4263	13.7071	14.2101	13.4385	13.7299	13.6253
Q99490	AGAP2	Arf-GAP with GTPase, ANK repeat and PH domain-containing protein 2	Undefined	8.01272e-05	4.09622	8.03213e-05	-0.205569	-4.46353		+	1.73813e-09	8.75992	0	-0.255939	-7.28502		+	0.000221973	3.6537	0.00779786	0.151068	3.83826		+	1.76598e-05	4.75302	5.61404e-05	-0.196684	-4.48427		+	13.8201	13.8633	13.8468	13.5382	13.2589	13.7532	13.909	13.4957	13.4938	13.4176	13.8675	13.96	13.6899	13.5537	13.6133	13.2462	13.4196	13.5639
Q96P47	AGAP3	Arf-GAP with GTPase, ANK repeat and PH domain-containing protein 3	Undefined	0.00517588	2.28602	0.00647537	-0.106183	-2.98274		+	0.000487746	3.31181	0.000354561	-0.0972886	-3.72123		+	2.55969e-08	7.59181	1.06952e-05	0.296388	6.06875		+	0.0001508	3.8216	0.00039834	-0.194683	-3.92255		+	14.2899	14.2514	14.2175	14.1698	14.0578	14.1874	14.3017	14.266	14.2564	13.9973	14.4134	14.5435	14.2736	13.9416	13.8998	14.0682	14.0364	14.1574
P52594	AGFG1	Arf-GAP domain and FG repeat-containing protein 1	Undefined	0.0770371	1.1133	0.103076	0.148148	1.82182			0.161611	0.791528	0.172135	-0.0769229	-1.41988			0.15806	0.801177	0.414959	-0.153685	-1.42271			0.283398	0.547603	0.377635	-0.0932466	-1.07785			13.6799	14.2758	13.2426	13.592	13.5076	14.1012	14.0646	13.2977	13.9347	13.4459	14.1808	13.7854	14.1092	13.7355	13.7753	13.4857	13.4254	13.5916
Q53H12	AGK	Acylglycerol kinase, mitochondrial	Undefined	6.31947e-05	4.19932	5.7971e-05	-0.291208	-4.56117		+	0.728246	0.137722	0.748409	-0.019056	-0.349414			0.927488	0.0326916	0.966183	0.00760526	0.0912474			0.861203	0.0648943	0.906081	-0.0157983	-0.175245			11.8064	11.7272	13.3156	12.476	12.7768	12.491	12.3901	12.4837	12.891	12.724	12.5085	12.2418	12.785	12.3743	12.7623	13.0901	12.0136	12.8728
P35573	AGL	Glycogen debranching enzyme	Undefined	0.75635	0.121277	0.806267	-0.0129154	-0.312719			0.00751096	2.1243	0.00664694	-0.0647146	-2.78195		+	0.564649	0.248221	0.765119	-0.0344377	-0.577952			0.353237	0.451933	0.454061	0.0437082	0.932168			13.9802	13.9042	13.5754	13.8537	13.8823	13.8819	13.5159	13.7976	13.4811	13.5702	13.439	13.5582	13.4225	13.658	13.8236	13.5979	13.4571	13.6929
Q9NUQ2	AGPAT5	1-acyl-sn-glycerol-3-phosphate acyltransferase epsilon	Undefined	0.52129	0.28292	0.600235	0.0665709	0.64788			0.00189197	2.72308	0.00146177	0.175973	3.27694		+	0.00260144	2.58479	0.0418705	0.340321	3.09394		+	0.441799	0.354775	0.544709	0.0779739	0.771951			14.3042	14.5313	12.996	14.4396	14.4862	14.0844	13.9363	14.5075	14.1523	14.4077	13.9898	14.0286	13.8811	14.1024	13.6928	14.0611	14.6262	14.4715
P23526	AHCY	Adenosylhomocysteinase	Undefined	0.0272474	1.56468	0.0367842	-0.0861426	-2.30448		+	0.0542965	1.26523	0.0556965	-0.0447288	-1.96897			1.6018e-09	8.79539	0	0.293691	6.67389		+	0.0473255	1.3249	0.0804598	0.0918348	2.00526			15.6784	15.7458	15.4995	15.4535	15.6815	15.6397	15.5865	15.3605	15.5885	15.6364	15.4447	15.1288	15.6381	15.5517	15.2865	15.7799	15.399	15.4977
O43865	AHCYL1	S-adenosylhomocysteine hydrolase-like protein 1	Undefined	0.346986	0.459688	0.418508	-0.0339512	-0.95328			0.509327	0.293004	0.526537	-0.0188754	-0.664468			0.22484	0.648127	0.492548	0.0850165	1.22163			0.036209	1.44118	0.0625242	-0.0921542	-2.11983			14.7991	14.8721	14.2744	14.3713	14.1464	14.6423	14.7118	14.4471	14.7904	14.6748	14.7816	14.4616	14.4104	14.7452	14.5152	14.553	14.5966	14.4733
Q96HN2	AHCYL2	Adenosylhomocysteinase 3	Ast	0.860777	0.0651092	0.893208	0.0110498	0.176681			0.256431	0.591029	0.270393	0.0492264	1.14749			0.00119377	2.92308	0.0254377	0.360324	3.34011		+	0.79434	0.0999933	0.860888	-0.0273604	-0.261295			15.1949	15.1709	15.0132	14.7455	14.4272	14.8085	15.01	14.6197	15.2911	14.7386	15.0496	15.0653	14.5954	14.8813	14.451	14.3783	14.9858	14.621
Q09666	AHNAK	Neuroblast differentiation-associated protein AHNAK	Undefined	0.00670992	2.17328	0.00855522	0.250527	2.88198		+	1.98107e-11	10.7031	0	0.346233	8.51371		+	0.000453769	3.34316	0.0131155	0.320332	3.63196		+	2.91508e-10	9.53535	0	0.530151	6.91769		+	15.0457	15.1136	14.6151	15.358	15.5115	15.6845	14.7376	15.1454	15.0713	15.3267	15.8669	14.5632	15.0871	15.1638	14.9039	15.5606	15.2238	15.6048
Q8IVF2	AHNAK2	Protein AHNAK2	Undefined	0.505978	0.295868	0.584327	-0.0716292	-0.672028			0.0191514	1.7178	0.0179329	-0.19663	-2.41939		+	0.00212738	2.67215	0.0368167	0.321592	3.15745		+	0.00504872	2.29682	0.0102574	-0.234486	-2.8599		+	18.9608	20.1228	20.0094	19.308	19.4419	20.4164	20.5232	19.9536	20.1313	20.2093	19.8549	20.2834	20.0551	19.5845	20.4952	19.4038	19.3992	19.6102
O95433	AHSA1	Activator of 90 kDa heat shock protein ATPase homolog 1	Undefined	1.04775e-06	5.97974	0	-0.235466	-5.89936		+	5.7568e-14	13.2398	0	-0.234885	-10.1716		+	0.122683	0.911214	0.366938	0.0639584	1.55733			0.119075	0.924181	0.181599	-0.0548787	-1.57059			15.6141	15.5746	15.4316	15.399	15.4324	15.397	15.6027	15.1322	15.5356	15.4602	15.2551	15.2311	15.5507	15.5101	15.5923	15.5612	15.4095	15.3219
O95831	AIFM1	Apoptosis-inducing factor 1, mitochondrial	Undefined	0.957102	0.0190418	0.968935	0.00163894	0.0541774			0.111414	0.953059	0.11922	0.0403447	1.61938			2.43893e-06	5.6128	0.000276527	0.198181	5.01376		+	2.64908e-05	4.5769	5.42373e-05	-0.146539	-4.38161		+	14.514	14.6404	14.3936	14.1106	14.087	14.1832	14.3237	13.8886	14.5153	14.3121	14.2229	14.1011	14.2711	14.2759	14.5332	14.2885	14.248	14.2545
Q12904	AIMP1	Aminoacyl tRNA synthase complex-interacting multifunctional protein 1	Undefined	0.0098679	2.00578	0.0129493	-0.149744	-2.72915		+	0.145341	0.837611	0.15491	-0.0686248	-1.47837			0.259797	0.585366	0.529919	0.0661777	1.13357			9.75184e-05	4.01091	0.000281113	0.218156	4.04076		+	13.2341	13.4854	13.0696	13.4836	13.5161	13.484	13.2458	13.4923	13.2418	13.6514	13.4882	13.0389	13.3744	13.2262	13.1447	13.7305	13.2386	13.4052
O00170	AIP	AH receptor-interacting protein	Undefined	0.313904	0.503203	0.382532	0.0699268	1.02176			0.796551	0.0987861	0.817176	0.00868308	0.259139			0.000254487	3.59433	0.00862357	-0.254108	-3.79938		+	0.0744085	1.12838	0.12059	0.0985496	1.80076			14.5303	14.3544	14.2857	14.5767	14.4375	14.3656	13.8878	14.2142	14.5001	14.4956	14.508	14.148	14.4497	14.4847	13.9491	14.6138	14.4456	14.6507
C9J069	AJM1	Apical junction component 1 homolog	Undefined	4.57619e-05	4.3395	4.36681e-05	-0.226009	-4.65144		+	4.23466e-08	7.37318	0	-0.290699	-6.4149		+	0.124136	0.906103	0.368807	0.0864753	1.55124			1.4798e-06	5.8298	9.61538e-06	-0.281143	-5.08385		+	13.7461	13.7572	13.3564	13.3826	13.0578	13.4633	13.5924	13.4165	13.4191	13.1769	13.4881	13.7824	13.5034	13.3137	13.5151	13.1461	13.2172	12.8849
P00568	AK1	Adenylate kinase isoenzyme 1	Undefined	0.520262	0.283778	0.599153	-0.0200688	-0.64949			0.00892701	2.04929	0.00797885	0.0527382	2.71695		+	7.65248e-06	5.1162	0.000509299	0.168021	4.73186		+	0.0093658	2.02846	0.0181916	0.0933964	2.64369		+	17.0665	16.785	16.6732	16.9225	17.0152	16.665	16.677	16.7833	16.7578	17.062	17.2158	16.543	16.6358	17.0695	16.6319	17.1129	16.8423	16.9891
P54819	AK2	Adenylate kinase 2, mitochondrial	Undefined	0.0251073	1.6002	0.0339551	0.268835	2.34011		+	3.28793e-07	6.48308	0	0.316864	5.85257		+	0.000909428	3.04123	0.0212171	0.340529	3.42384		+	2.86391e-05	4.54304	5.34224e-05	0.449336	4.3617		+	14.971	14.7757	14.4556	14.5081	14.6069	14.8237	14.6761	15.279	15.0063	14.8824	15.1695	14.8046	14.9899	14.7537	14.9574	14.6336	14.6012	15.079
Q9UIJ7	AK3	GTP:AMP phosphotransferase AK3, mitochondrial	Undefined	7.45727e-07	6.12742	0	0.303349	6.01146		+	4.73266e-23	22.3249	0	0.396642	17.1471		+	7.23206e-11	10.1407	0	0.478195	7.32986		+	0.149496	0.825372	0.219892	0.0790009	1.4512			16.0694	15.8504	15.6885	15.6697	15.9154	15.865	15.3915	15.711	16.2224	15.8749	15.9344	15.65	15.7106	15.5975	15.4313	15.6817	15.5498	16.1002
P27144	AK4	Adenylate kinase 4, mitochondrial	Undefined	0.0141591	1.84896	0.018902	0.092144	2.58225		+	3.92127e-06	5.40657	0	0.139356	5.16029		+	2.19657e-08	7.65826	1.08401e-05	0.377396	6.10273		+	0.408787	0.388502	0.512938	0.0532331	0.829115			15.2285	15.3735	15.1357	15.0964	15.3914	14.8517	14.9048	14.8477	15.0837	15.142	15.1514	15.2772	15.1828	15.2117	14.9432	14.936	15.1666	14.9248
Q9Y6K8	AK5	Adenylate kinase isoenzyme 5	Undefined	2.79236e-05	4.55403	2.83688e-05	-0.172458	-4.81612		+	3.37468e-15	14.4718	0	-0.297336	-11.0102		+	1.43547e-05	4.843	0.000919355	-0.255871	-4.57283		+	0.0553039	1.25724	0.0926305	-0.0851528	-1.9365			14.8418	14.9469	14.6485	14.5279	14.6511	14.6919	14.7624	14.5916	14.6437	14.5399	14.6249	14.7831	14.9903	14.7197	14.8327	14.611	14.4942	14.7143
O43572	AKAP10	A-kinase anchor protein 10, mitochondrial	Undefined	0.711962	0.147543	0.770922	0.0271359	0.372236			0.527633	0.277668	0.54565	-0.0253244	-0.635896			0.00112433	2.94911	0.0242536	-0.280083	-3.35867		+	0.951584	0.021553	0.971078	0.00480333	0.0608532			12.984	13.2384	13.2816	12.9229	13.0766	12.9892	12.952	12.9269	13.3079	13.0142	13.2154	13.4642	13.3247	13.094	12.964	13.3032	12.9577	13.4665
Q02952	AKAP12	A-kinase anchor protein 12	Undefined	0.0937056	1.02823	0.124592	-0.0716488	-1.72305			0.000701121	3.15421	0.000513423	-0.088408	-3.60411		+	8.78192e-06	5.05641	0.00059887	0.326686	4.69732		+	0.983988	0.00701027	0.992989	0.00111088	0.0201141			16.1614	16.1972	16.0807	15.2111	15.3239	15.8462	15.9833	15.4912	15.501	15.358	15.734	15.6185	15.7144	15.8861	15.8005	15.9633	15.574	15.5124
P24588	AKAP5	A-kinase anchor protein 5	Undefined	0.00114817	2.93999	0.00153557	-0.283274	-3.54162		+	8.64278e-06	5.06335	4.87211e-06	-0.303332	-4.93498		+	0.00157542	2.8026	0.0303809	0.306052	3.25327		+	0.968893	0.013724	0.982844	0.00299343	0.0390829			13.1097	14.9019	14.2443	14.1653	14.6655	14.1901	14.2405	14.0742	13.6651	13.4779	14.1267	13.9876	13.8948	13.9716	14.332	13.9326	13.7738	13.6073
P14550	AKR1A1	Aldo-keto reductase family 1 member A1	Undefined	0.00105199	2.97799	0.00144414	-0.116129	-3.57301		+	0.489103	0.3106	0.507622	0.0213255	0.696685			0.0756087	1.12143	0.287337	0.143612	1.7962			0.00465543	2.33204	0.00955386	0.168786	2.88742		+	15.1444	14.7222	14.2454	14.5351	13.8703	14.5023	14.602	14.3755	14.4086	14.7765	14.5805	14.3457	13.9547	14.9784	14.5367	14.7397	14.4762	14.895
P15121	AKR1B1	Aldo-keto reductase family 1 member B1	Undefined	0.684114	0.164872	0.745712	0.0170468	0.410263			0.000182877	3.73784	0.000125237	0.122944	4.02965		+	7.75505e-09	8.11042	1.27796e-05	0.492596	6.33207		+	1.6907e-06	5.77193	9.50119e-06	0.358068	5.0527		+	17.5133	17.0347	17.012	16.6895	16.6659	17.0366	16.8809	16.6825	16.9609	16.9936	17.1141	16.5528	17.1554	16.9396	16.6423	16.9111	16.6743	17.2018
O60218	AKR1B10	Aldo-keto reductase family 1 member B10	Undefined	1	0	0.988062	-0.0992563	0			1	0	1	NaN	0			0.0452523	1.34436	0.220774	-5.4701	-2.28689			0.822832	0.0846889	0.881591	-0.694387	-0.231375			NaN	NaN	NaN	NaN	NaN	NaN	NaN	NaN	NaN	NaN	NaN	NaN	10.6302	NaN	NaN	NaN	NaN	NaN
P13716	ALAD	Delta-aminolevulinic acid dehydratase	Undefined	0.712757	0.147059	0.771339	-0.0211271	-0.371158			2.98923e-06	5.52444	0	0.180054	5.23706		+	0.000244216	3.61223	0.00837512	0.274546	3.81112		+	2.94926e-11	10.5303	0	0.486036	7.37474		+	14.8969	14.3805	14.5448	14.4153	14.4797	14.5786	14.5537	14.3956	14.7941	14.6655	15.0443	14.1313	14.4855	14.6939	13.7123	14.3067	14.3776	14.6186
P02768	ALB	Albumin	Undefined	0.759527	0.119457	0.809477	-0.0284433	-0.308505			3.44101e-05	4.46331	1.2931e-05	0.202346	4.53331		+	0.00107952	2.96677	0.0237348	0.476502	3.37123		+	0.0894073	1.04863	0.140418	0.204311	1.71326			16.5323	16.449	17.0931	16.0069	16.6884	16.5806	16.6369	16.6203	16.2045	15.636	15.8359	15.2567	16.5074	16.9255	14.9219	16.1221	16.146	15.6664
Q13740	ALCAM	CD166 antigen	Undefined	8.69155e-07	6.0609	0	-0.307153	-5.96096		+	0.000115618	3.93698	7.84314e-05	-0.180312	-4.17029		+	0.13532	0.868638	0.384796	-0.0865293	-1.50612			0.000748428	3.12585	0.0016918	0.18978	3.46575		+	14.2303	14.4282	13.1816	14.1458	13.8824	13.7822	13.5397	13.7243	13.8925	13.9687	14.0537	13.7017	13.7163	13.8718	13.6313	13.9259	13.3505	13.9846
P00352	ALDH1A1	Aldehyde dehydrogenase 1A1	Undefined	0.808834	0.0921406	0.850396	0.0256408	0.243768			0.372373	0.429021	0.390652	-0.036932	-0.899803			0.000382633	3.41722	0.0116676	-0.436781	-3.68183		+	0.186603	0.729082	0.268045	0.109679	1.32876			12.6892	13.1941	12.7571	13.4261	12.5019	13.33	13.2709	13.2033	13.5083	13.8752	13.9692	12.0952	13.5913	13.7356	12.8914	13.4026	12.8043	13.905
P30837	ALDH1B1	Aldehyde dehydrogenase X, mitochondrial	Undefined	0.504147	0.297443	0.582569	0.06555	0.676703			0.0046281	2.3346	0.00390382	0.193174	2.98412		+	0.0697286	1.15659	0.2758	-0.225054	-1.83604			0.319974	0.494886	0.418403	0.118922	0.9992			13.0215	12.1561	10.3996	10.8006	11.7936	12.0244	11.745	11.2863	12.0878	12.84	11.1039	12.6751	12.2818	11.5959	13.1565	10.9202	NaN	12.5184
O75891	ALDH1L1	Cytosolic 10-formyltetrahydrofolate dehydrogenase	Undefined	1.01001e-05	4.99567	1.07239e-05	0.166217	5.15298		+	2.30162e-14	13.638	0	0.246657	10.4399		+	0.00488358	2.31126	0.0619687	-0.214278	-2.88144			0.000498245	3.30256	0.00115152	0.247306	3.58548		+	14.7155	14.087	14.5097	14.2529	14.8489	14.2848	14.1946	14.1233	14.4728	14.3927	14.883	14.3919	14.2226	14.5689	14.2524	14.3932	14.3204	14.7855
P05091	ALDH2	Aldehyde dehydrogenase, mitochondrial	Undefined	2.76439e-11	10.5584	0	0.235587	9.5533		+	4.72933e-19	18.3252	0	0.292344	13.8261		+	0.00320384	2.49433	0.0477842	0.137562	3.02359		+	0.979317	0.00907656	0.989575	0.00114429	0.0259822			16.4294	16.0217	15.8333	15.7605	15.9207	16.0538	15.7841	15.8539	16.3226	16.152	16.0015	15.7648	16.2072	16.1899	15.8122	16.078	15.9167	16.1026
P51648	ALDH3A2	Aldehyde dehydrogenase family 3 member A2	Undefined	0.85585	0.0676022	0.889972	0.00890046	0.183005			0.000178365	3.74869	0.000117983	0.109625	4.03736		+	5.3239e-06	5.27377	0.000447761	-0.261422	-4.82226		+	8.07762e-06	5.09272	2.32108e-05	-0.241124	-4.67833		+	13.2793	13.439	13.054	13.5287	13.7477	13.18	12.943	13.5436	13.2458	13.7252	13.493	13.0978	13.0756	13.233	13.3068	13.6087	13.643	13.4925
P30038	ALDH4A1	Delta-1-pyrroline-5-carboxylate dehydrogenase, mitochondrial	Undefined	3.83742e-12	11.416	0	0.354079	10.3053		+	3.18409e-25	24.497	0	0.421399	19.1621		+	4.35337e-05	4.36117	0.00223059	0.239579	4.28436		+	0.377751	0.422795	0.479652	-0.0413608	-0.885531			16.4654	16.1299	15.6567	15.9464	16.3384	16.0235	15.989	15.6119	16.4266	16.0146	16.3048	16.2603	16.0727	16.2849	16.296	16.2222	15.8632	16.097
P51649	ALDH5A1	Succinate-semialdehyde dehydrogenase, mitochondrial	Undefined	0.0802027	1.09581	0.107404	0.0564557	1.80176			0.0007814	3.10713	0.000566694	0.0707092	3.56877		+	9.15695e-05	4.03825	0.00402144	0.282481	4.08445		+	0.227658	0.642718	0.314975	-0.0627274	-1.213			16.4526	16.3219	16.2778	15.746	16.2513	16.0306	16.3189	16.1291	16.417	16.2994	16.1809	16.074	16.1103	16.164	16.3639	15.9384	16.1861	16.2912
Q02252	ALDH6A1	Methylmalonate-semialdehyde dehydrogenase	Undefined	2.26563e-12	11.6448	0	0.271006	10.5108		+	3.19738e-19	18.4952	0	0.340273	13.9582		+	0.00534011	2.27245	0.065371	0.151248	2.85069			0.214693	0.668182	0.300469	0.0594416	1.24777			17.5368	17.1131	16.7784	16.8697	17.1418	16.9916	16.7699	16.786	17.4038	17.1992	17.1792	16.6123	16.9766	17.0477	16.8604	16.8874	16.9172	16.9683
P49419	ALDH7A1	Alpha-aminoadipic semialdehyde dehydrogenase	Undefined	1.41736e-10	9.84852	0	0.161147	8.95105		+	2.53197e-15	14.5965	0	0.252833	11.0966		+	0.000401433	3.39639	0.0120432	0.233229	3.66785		+	0.00561062	2.25099	0.0113079	0.172358	2.82381		+	17.2911	17.0361	16.8424	17.0564	17.1552	16.8506	16.7595	16.7074	17.0557	17.099	17.0773	16.5829	17.0172	16.8876	16.7219	16.7224	16.1734	16.9957
P49189	ALDH9A1	4-trimethylaminobutyraldehyde dehydrogenase	Undefined	3.1464e-06	5.50219	0	0.175571	5.53733		+	1.2782e-17	16.8934	0	0.258292	12.7416		+	2.66101e-13	12.575	0	0.522443	8.48391		+	5.11789e-08	7.29091	0	0.35706	5.83945		+	16.9819	16.575	16.5236	16.3265	16.8297	16.6768	16.5238	16.4375	16.7492	16.4922	17.0922	16.4458	16.7822	16.7869	16.1678	16.5237	16.5461	16.8295
P04075	ALDOA	Fructose-bisphosphate aldolase A	Neuron	0.000306676	3.51332	0.000528053	-0.0997778	-4.00617		+	1.70542e-08	7.76817	0	-0.138806	-6.66301		+	1.22104e-10	9.91327	0	0.291081	7.22014		+	0.000262982	3.58007	0.000646983	-0.14587	-3.76822		+	20.0339	20.0903	19.7728	19.371	19.4572	19.902	19.9698	19.553	19.5808	19.3955	19.407	19.7252	19.8043	19.5899	19.8208	19.6761	19.5537	19.4519
P09972	ALDOC	Fructose-bisphosphate aldolase C	Undefined	0.856623	0.0672103	0.890558	0.00426817	0.182013			0.578102	0.237995	0.597388	0.0118958	0.559677			1.73067e-08	7.76179	1.13314e-05	0.273957	6.15553		+	0.0291542	1.5353	0.0513978	0.100561	2.20953			18.4293	18.3384	18.4775	17.5388	17.8692	18.2523	18.3487	18.0711	18.1753	17.6756	18.0002	18.1025	18.196	18.1348	17.9626	18.1522	18.1971	18.1206
O75342	ALOX12B	Arachidonate 12-lipoxygenase, 12R-type	Undefined	0.726329	0.138867	0.784165	-0.202053	-0.357118			0.850813	0.0701659	0.869164	-0.0548638	-0.189711			0.697182	0.156654	0.847069	-0.169358	-0.391032			0.170398	0.768536	0.246938	-0.372364	-1.38322			13.8846	12.0608	12.685	13.7894	13.5366	12.7274	14.1252	14.5095	NaN	12.6495	NaN	12.0563	14.1432	10.8434	13.8213	11.8357	13.7891	11.4149
Q9BYJ1	ALOXE3	Hydroperoxide isomerase ALOXE3	Undefined	0.510988	0.29159	0.589522	0.21309	0.707276			0.680267	0.16732	0.700489	-0.642648	-0.443604			0.472639	0.32547	0.705661	0.441308	0.726278			0.226752	0.644448	0.31411	-0.871595	-1.22979			NaN	NaN	NaN	NaN	11.7793	NaN	NaN	13.8318	NaN	NaN	NaN	NaN	NaN	NaN	9.42635	NaN	NaN	NaN
Q8N7J2	AMER2	APC membrane recruitment protein 2	Undefined	0.566537	0.246771	0.642635	-0.0341175	-0.57864			2.22666e-11	10.6523	0	-0.222621	-8.48128		+	8.30633e-06	5.08059	0.000585227	0.376749	4.71131		+	0.0778872	1.10853	0.124787	0.110015	1.77925			15.7822	15.4235	15.3506	15.2114	15.0514	15.5343	15.1199	15.0941	15.2013	15.39	15.146	14.7866	15.2392	14.973	15.0505	15.3688	15.13	15.2396
Q01433	AMPD2	AMP deaminase 2	Undefined	0.209615	0.678577	0.267227	0.040157	1.27813			0.420599	0.376132	0.439214	-0.0193895	-0.811814			0.00221116	2.65538	0.0377979	0.134354	3.14499		+	4.32034e-07	6.36448	1.08108e-05	0.20399	5.36685		+	14.5932	14.4897	14.4982	14.2847	14.7163	14.4338	13.8857	14.045	14.2807	14.1429	14.4534	14.1631	14.2587	14.2038	13.9926	14.3694	14.3144	14.3427
P49418	AMPH	Amphiphysin	Neuron	6.3732e-08	7.19564	0	-0.154069	-6.82818		+	4.81205e-07	6.31767	0	-0.127849	-5.74729		+	1.43433e-06	5.84335	0.000193437	0.194145	5.14183		+	0.0175909	1.75471	0.0321362	-0.0886979	-2.40947		+	16.0201	16.0315	15.8549	15.3395	15.6949	15.9424	16.0034	15.6268	15.6458	15.4294	15.5519	15.6142	15.8724	15.7536	15.6159	15.8541	15.6898	15.599
P0DTE7	AMY1B	Alpha-amylase 1B	Undefined	0.723126	0.140786	0.781355	0.316621	0.367015			0.227564	0.642896	0.240271	0.96023	1.23474			0.353965	0.45104	0.613374	-0.486134	-0.934546			0.325517	0.487427	0.424859	-0.579549	-0.989672			8.51431	1.42542	NaN	12.1796	12.9603	7.06084	10.8451	13.0581	12.6915	NaN	NaN	NaN	12.2458	12.3167	NaN	13.5079	12.2384	1.2795
P16157	ANK1	Ankyrin-1	Undefined	0.211484	0.674723	0.269593	-0.0753345	-1.27279			0.124677	0.904212	0.132648	-0.072587	-1.56063			0.000565103	3.24787	0.0153074	-0.275868	-3.56714		+	0.217185	0.663171	0.303665	-0.0826704	-1.24098			14.7451	14.4069	14.652	15.0893	14.8667	14.2694	14.5318	15.1254	14.8186	14.4461	14.5456	14.6188	14.7076	14.6469	14.8795	14.955	14.6795	14.3965
Q01484-5	ANK2	Ankyrin-2	Undefined	7.60332e-10	9.119	0	-0.160938	-8.34911		+	1.06211e-06	5.97383	0	-0.104633	-5.52733		+	4.02542e-07	6.39519	2.38569e-05	0.150573	5.44213		+	0.906787	0.0424945	0.938708	0.00286158	0.117355			17.8539	17.8165	17.5169	17.5233	17.5534	17.7001	17.631	17.6009	17.5958	17.5155	17.7335	17.6901	17.7788	17.85	17.5413	17.7966	17.621	17.645
Q01484	ANK2	Ankyrin-2	Undefined	5.80135e-05	4.23647	4.1841e-05	-0.121641	-4.57203		+	9.9778e-13	12.001	0	-0.17539	-9.35192		+	0.000704647	3.15203	0.0177988	0.111984	3.50115		+	5.39784e-10	9.26778	0	-0.216853	-6.79295		+	16.9211	17.0462	16.6479	16.5627	16.5946	16.8335	16.916	16.7594	16.6536	16.4156	16.4351	16.7151	16.7996	16.6557	16.6607	16.7283	16.5506	16.4939
Q12955	ANK3	Ankyrin-3	Oli	1.01506e-09	8.99351	0	-0.227107	-8.24715		+	5.37391e-18	17.2697	0	-0.257873	-13.0219		+	9.84937e-07	6.00659	0.00015942	0.157773	5.23154		+	0.000226745	3.64446	0.000562418	-0.104938	-3.80977		+	17.057	17.0937	16.9114	16.8354	16.6263	16.9728	16.9714	16.8756	16.8167	16.8399	16.7866	16.8681	16.9531	16.8496	16.8711	16.8342	16.7739	16.8085
Q9P2R3	ANKFY1	Rabankyrin-5	Undefined	0.358707	0.44526	0.432053	0.134279	0.932138			0.940597	0.0265963	0.948861	-0.0121702	-0.0749776			0.659936	0.180498	0.827036	-0.0744801	-0.441588			0.314331	0.502613	0.412088	0.196405	1.01165			11.9118	10.8489	11.5394	NaN	12.2934	11.6694	11.0869	11.4778	12.0687	12.4152	12.6506	11.718	12.014	11.4697	14.2117	11.724	11.7979	13.5188
Q8IV38	ANKMY2	Ankyrin repeat and MYND domain-containing protein 2	Undefined	0.00502128	2.29919	0.00629494	-0.227517	-2.99441		+	0.00384106	2.41555	0.00319484	-0.268345	-3.02935		+	0.0386081	1.41332	0.203075	0.295748	2.09715			0.0145044	1.8385	0.0269293	0.390464	2.48315		+	13.7596	14.0165	13.2501	13.4575	13.2329	14.156	14.2638	14.0717	13.5298	13.9033	13.5278	13.8064	14.0658	13.8942	13.7861	13.4613	13.7453	13.4152
Q8N283	ANKRD35	Ankyrin repeat domain-containing protein 35	Undefined	0.750132	0.124862	0.80179	-0.277596	-0.349024			0.516368	0.287041	0.534152	0.220698	0.675448			0.219486	0.658593	0.487389	0.599458	1.26231			0.945326	0.0244184	0.967641	-0.0212858	-0.0691353			NaN	NaN	NaN	NaN	NaN	NaN	NaN	10.698	NaN	11.8719	10.455	NaN	NaN	12.0311	NaN	11.2878	11.6637	10.3601
Q7Z6G8-3	ANKS1B	Ankyrin repeat and sterile alpha motif domain-containing protein 1B	Undefined	0.00215265	2.66703	0.00284804	-0.17346	-3.31298		+	1.20931e-07	6.91746	0	-0.336327	-6.12774		+	0.0017266	2.76281	0.0322877	-0.116633	-3.22424		+	1.32703e-19	18.8771	0	-0.45504	-11.0127		+	14.8968	15.0399	14.9196	14.9637	15.0981	14.4515	14.9732	14.9389	14.9828	14.4933	14.725	14.8023	14.8809	14.612	15.1015	14.6827	14.8291	14.5234
P23352	ANOS1	Anosmin-1	Undefined	0.0635296	1.19702	0.0854685	0.495795	2.0441			0.437972	0.358553	0.456538	-0.349907	-0.792291			0.235578	0.627866	0.505698	-0.196363	-1.20028			0.659042	0.181087	0.746542	-0.114335	-0.443478			14.0682	14.6879	NaN	NaN	NaN	13.5982	NaN	NaN	13.6047	13.6098	13.0497	NaN	NaN	NaN	NaN	14.085	13.4379	13.3582
P50995	ANXA11	Annexin A11	Undefined	0.0346826	1.45989	0.0475129	0.0515718	2.19764		+	0.00768142	2.11456	0.00680537	0.0635059	2.77355		+	0.0329321	1.48238	0.186502	-0.0956731	-2.16417			0.113585	0.944677	0.173655	0.0553417	1.59464			14.97	15.3396	15.1759	15.4931	15.4182	15.1326	15.0819	15.1789	15.2329	15.5602	15.4178	15.551	15.1566	15.1707	15.183	15.3508	15.3927	15.5211
P12429	ANXA3	Annexin A3	Undefined	0.1702	0.76904	0.220289	-0.213666	-1.40315			0.0210478	1.67679	0.0198476	-0.32861	-2.39501		+	0.0532268	1.27387	0.240254	-0.392945	-1.95884			0.000656302	3.1829	0.00146429	0.579788	3.51132		+	11.9915	10.7035	11.3033	11.5202	12.6877	10.2102	11.3508	12.8166	12.4185	12.1113	11.8927	12.1159	12.0812	11.8531	10.0525	12.3641	12.1686	11.7644
P09525	ANXA4	Annexin A4	Undefined	0.00182936	2.7377	0.00241294	0.309626	3.37274		+	2.57921e-09	8.58851	0	0.372465	7.17747		+	0.686973	0.16306	0.841948	-0.0311604	-0.404189			1.03137e-05	4.98659	2.99625e-05	0.310895	4.61824		+	13.3722	13.1454	12.7779	13.6107	14.0796	13.0927	13.0007	13.3092	13.0008	13.5588	13.6096	13.3415	13.3461	13.4125	13.8689	13.516	13.7655	13.4059
P08758	ANXA5	Annexin A5	Undefined	7.25265e-07	6.1395	0	0.359167	6.02064		+	5.21585e-16	15.2827	0	0.439948	11.5768		+	0.068872	1.16196	0.27402	-0.154104	-1.83991			4.00071e-12	11.3979	0	0.575572	7.766		+	15.2003	15.2432	15.2072	15.2642	15.2594	15.5424	14.7849	14.8725	15.1317	15.8336	15.4699	14.7839	15.2599	15.3672	14.7814	15.2916	15.0223	15.975
P08133	ANXA6	Annexin A6	Undefined	7.64439e-12	11.1167	0	-0.287036	-10.0396		+	4.07266e-15	14.3901	0	-0.250973	-10.9538		+	0.685444	0.164028	0.841011	-0.0212002	-0.406276			0.287406	0.541504	0.382599	-0.0460885	-1.06887			15.9496	16.0394	15.7244	15.4913	15.3506	16.0494	15.9063	15.5457	15.5697	15.9123	15.7874	14.8112	15.9184	15.9742	15.8756	15.8165	15.4434	15.8279
P20073	ANXA7	Annexin A7	Undefined	0.18417	0.734781	0.236908	-0.0384305	-1.35478			0.452385	0.344491	0.471048	0.014152	0.757136			5.28776e-08	7.27673	1e-05	0.208865	5.90655		+	0.413508	0.383516	0.517637	-0.0275978	-0.820765			16.078	15.8243	15.5523	15.831	15.8032	15.8223	15.7579	15.9358	15.7082	16.0307	16.0241	15.9468	15.8232	15.8104	15.8077	15.8333	15.7237	15.7143
P13928	ANXA8	Annexin A8	Undefined	0.380153	0.420042	0.454914	0.0659398	0.888849			0.83793	0.0767925	0.857353	0.0115044	0.20559			0.415164	0.38178	0.662773	0.0903397	0.818386			0.000896518	3.04744	0.00202757	0.372862	3.4117		+	13.3083	12.5147	13.8498	13.8198	13.8254	12.9979	12.9567	13.6024	13.1874	13.6117	13.2509	12.73	13.154	12.8056	12.5415	12.8803	13.4182	13.5292
Q10567	AP1B1	AP-1 complex subunit beta-1	Undefined	7.4025e-10	9.13062	0	-0.191679	-8.35858		+	1.96146e-05	4.70742	4.53515e-06	-0.111998	-4.69807		+	2.06812e-07	6.68442	1.70213e-05	0.297484	5.5964		+	0.0305447	1.51506	0.0536914	-0.116212	-2.19046			15.3956	15.4049	15.2663	14.9888	15.1483	15.0585	15.2078	15.1785	15.1625	15.0975	14.8399	14.9292	15.1381	15.1183	15.0916	15.0599	15.0935	15.002
O43747	AP1G1	AP-1 complex subunit gamma-1	Undefined	0.0155771	1.80751	0.0208344	-0.107935	-2.54273		+	0.313665	0.503534	0.331646	0.0460744	1.01742			2.18225e-06	5.6611	0.000241042	0.359753	5.04072		+	0.594193	0.226072	0.694114	-0.0301066	-0.534286			13.4495	13.4206	13.0865	12.9175	12.7651	13.228	13.2073	13.119	13.2707	12.9422	13.1064	13.1653	13.2317	13.0588	12.809	12.6535	13.0529	13.0934
Q9BXS5	AP1M1	AP-1 complex subunit mu-1	Undefined	0.114371	0.941683	0.151453	-0.0781173	-1.61925			0.0329584	1.48203	0.0326859	-0.0966431	-2.19097		+	0.722359	0.141247	0.858285	-0.0267132	-0.356351			0.671046	0.173248	0.756762	0.0265679	0.425825			13.8949	14.3065	14.254	14.2479	14.2258	13.8323	14.0192	14.1959	13.8838	13.9573	13.7288	13.9491	14.1746	13.8578	13.7877	13.9645	14.0095	14.0535
O95782	AP2A1	AP-2 complex subunit alpha-1	Undefined	6.61002e-10	9.1798	0	-0.181893	-8.39867		+	4.55157e-11	10.3418	0	-0.181188	-8.28337		+	8.46526e-10	9.07236	0	0.318415	6.81044		+	0.00207648	2.68267	0.00442224	-0.139232	-3.15201		+	16.6465	16.7702	16.5114	16.3785	16.4862	16.4342	16.5721	16.4639	16.4208	16.3197	16.0799	16.5081	16.4625	16.4536	16.6023	16.396	16.49	16.1432
O94973	AP2A2	AP-2 complex subunit alpha-2	Undefined	2.33785e-10	9.63118	0	-0.166206	-8.77002		+	6.77024e-08	7.1694	0	-0.135793	-6.28665		+	0.00604177	2.21884	0.0708112	0.0939041	2.80783			3.30925e-06	5.48027	8.73362e-06	-0.153669	-4.89399		+	15.1825	15.2811	15.091	14.8543	14.9586	15.0006	15.1336	14.8766	14.9728	14.7597	14.6647	14.9204	15.0785	14.9267	14.9982	14.9738	14.8294	14.7141
P63010	AP2B1	AP-2 complex subunit beta	Undefined	2.69202e-05	4.56992	2.85714e-05	-0.167447	-4.82829		+	6.69907e-08	7.17399	0	-0.174178	-6.28954		+	2.99985e-05	4.5229	0.00166585	0.257454	4.38241		+	0.0122156	1.91308	0.0230918	-0.128435	-2.54683		+	15.8365	15.9617	15.5826	15.2485	15.156	15.5122	15.7245	15.3259	15.4839	15.2781	15.179	15.4685	15.7097	15.6781	15.7107	15.4728	15.4213	15.3711
Q96CW1	AP2M1	AP-2 complex subunit mu	Undefined	4.45596e-05	4.35106	4.40529e-05	-0.15444	-4.66034		+	9.93948e-10	9.00264	0	-0.149773	-7.43743		+	2.1737e-05	4.6628	0.00124615	0.153648	4.46621		+	4.39174e-05	4.35736	0.000101426	-0.128713	-4.25148		+	17.5359	17.523	17.4455	17.1585	17.1385	17.3039	17.5043	17.1623	17.3431	17.2518	16.9897	17.2253	17.3963	17.3277	17.3863	17.2408	17.1339	17.1133
P53680	AP2S1	AP-2 complex subunit sigma	Undefined	0.0673117	1.17191	0.0904414	-0.106008	-1.88819			0.327412	0.484905	0.34633	-0.0412628	-0.988651			0.0311298	1.50682	0.181127	-0.116218	-2.18756			0.439181	0.357357	0.541753	-0.0447114	-0.776322			16.488	16.8612	17.0398	16.5376	16.3487	16.4839	16.6463	16.4987	16.5048	16.5388	16.3098	16.4765	16.5751	16.3991	16.4723	16.2493	16.3792	16.6211
Q13367	AP3B2	AP-3 complex subunit beta-2	Undefined	9.39393e-05	4.02715	9.41176e-05	-0.145928	-4.40991		+	5.78819e-07	6.23746	0	-0.137446	-5.69612		+	2.05203e-06	5.68782	0.000236066	0.224132	5.05561		+	1.99425e-08	7.70022	0	-0.238075	-6.04228		+	15.8834	15.9282	15.6773	15.445	15.4321	15.5581	15.8677	15.7412	15.7622	15.6111	15.2804	15.8116	15.6932	15.6016	15.7308	15.6553	15.617	15.4793
O14617	AP3D1	AP-3 complex subunit delta-1	Undefined	0.292382	0.534049	0.360321	-0.0326009	-1.06901			0.314273	0.502693	0.332075	-0.0252751	-1.01613			0.141206	0.850147	0.39292	-0.0446175	-1.48354			1.2516e-12	11.9025	0	-0.239799	-7.99106		+	15.0883	14.8985	14.8912	14.8129	14.7061	14.8657	15.0046	14.8552	14.9282	14.9766	14.9067	15.1416	15.0438	14.9916	14.9136	15.0021	14.9736	14.9038
P53677	AP3M2	AP-3 complex subunit mu-2	Undefined	0.122255	0.912732	0.161145	-0.126701	-1.58371			0.698312	0.155951	0.718714	-0.0209276	-0.389752			0.0593959	1.22624	0.253619	0.18678	1.90787			0.110562	0.956393	0.169746	-0.166868	-1.60829			13.6636	14.5462	14.4316	14.0516	14.2838	14.3516	14.4965	13.8369	14.5209	13.936	14.275	13.9964	14.5621	14.1742	14.347	14.3097	14.1032	14.5803
Q92572	AP3S1	AP-3 complex subunit sigma-1	Undefined	0.0476567	1.32188	0.0647232	-0.153381	-2.05251			0.161914	0.790715	0.172442	0.0702411	1.41883			0.246681	0.607865	0.516163	0.0893951	1.16556			0.000179678	3.7455	0.000471545	-0.318505	-3.87437		+	13.0397	13.6873	13.4386	13.084	13.1277	13.6164	13.9602	13.0522	13.4339	13.2679	13.5361	14.0266	13.7905	13.7314	13.9055	13.4978	13.0761	13.406
Q02410	APBA1	Amyloid-beta A4 precursor protein-binding family A member 1	In	0.0139186	1.85641	0.0186559	0.0991623	2.58931		+	0.643691	0.191322	0.662302	-0.014591	-0.465255			7.4487e-17	16.1279	0	0.569027	10.1399		+	0.657359	0.182197	0.74598	0.0189601	0.444739			13.9459	13.6651	13.5685	13.6503	13.429	13.5286	13.5818	13.5162	13.4618	13.3591	13.5439	13.6203	13.5251	13.7093	13.5244	13.4973	13.2694	13.4804
Q99767	APBA2	Amyloid-beta A4 precursor protein-binding family A member 2	Undefined	0.18268	0.73831	0.235208	-0.230437	-1.36523			0.0978481	1.00945	0.10423	-0.231743	-1.69217			0.53725	0.269823	0.747729	-0.112676	-0.61949			0.000676797	3.16954	0.00152444	0.539553	3.50527		+	13.4379	14.7445	14.2197	12.037	13.2925	15.0603	14.8092	13.345	13.0768	13.3286	13.5491	13.6071	14.4285	14.5711	14.3236	13.8729	13.3611	13.5745
P13798	APEH	Acylamino-acid-releasing enzyme	Undefined	0.950569	0.0220166	0.963668	-0.00262687	-0.0624389			0.0899085	1.0462	0.095593	-0.0480042	-1.72808			0.00313362	2.50395	0.0470925	-0.178365	-3.03094		+	0.352522	0.452814	0.453897	-0.0487979	-0.933559			15.1289	15.2932	15.4312	15.2085	15.3212	15.2499	15.1672	15.0553	15.2118	14.8779	14.8238	14.4657	15.1851	14.9501	15.3397	14.9887	15.0574	14.7048
P27695	APEX1	DNA-(apurinic or apyrimidinic site) endonuclease	Undefined	0.598327	0.223062	0.671834	-0.0935392	-0.531794			0.00956179	2.01946	0.00857778	0.19079	2.69084		+	0.0212714	1.6722	0.146568	0.2031	2.34196			1.51738e-07	6.81891	1.26183e-05	0.387875	5.60121		+	14.6048	13.9726	13.3867	13.5656	14.0542	13.7445	13.6468	13.7443	14.2889	14.1395	13.6588	13.9377	13.8737	13.7542	12.862	13.7277	14.0384	13.5544
Q9BZZ5	API5	Apoptosis inhibitor 5	Undefined	0.978779	0.00931518	0.984034	0.00241778	0.02679			0.0137496	1.86171	0.012643	-0.118279	-2.55025		+	0.257079	0.589934	0.527346	-0.0890274	-1.14018			0.365262	0.437395	0.466323	0.0654398	0.909076			14.5813	14.1665	14.1183	14.3011	14.0398	14.2936	14.0865	14.0384	14.2435	14.1165	14.4879	14.3921	14.1387	13.7775	14.2728	13.3014	14.0493	13.8199
Q9HDC9	APMAP	Adipocyte plasma membrane-associated protein	Undefined	0.00173946	2.75958	0.00229219	-0.183404	-3.39116		+	7.23606e-05	4.1405	3.65482e-05	-0.127697	-4.31205		+	1.68853e-05	4.77249	0.00105152	0.24647	4.53128		+	0.751322	0.124174	0.824437	0.0177412	0.317669			15.6485	15.8542	15.5113	15.2383	15.5948	15.7168	15.5404	15.6453	15.5321	15.533	15.562	15.6942	15.7139	15.6454	15.237	15.3835	15.5593	15.5914
P06727	APOA4	Apolipoprotein A-IV	Undefined	0.685563	0.163953	0.746888	0.0976505	0.408476			0.413939	0.383064	0.432901	0.153142	0.826286			0.857457	0.0667879	0.930851	-0.0318497	-0.180208			0.141424	0.849476	0.209896	0.287459	1.48448			NaN	10.322	12.956	11.4907	13.0798	13.5818	10.6839	12.9783	11.8371	12.8999	11.848	13.1777	12.9359	12.4347	NaN	12.3873	14.511	12.5279
P04114	APOB	Apolipoprotein B-100	Undefined	0.215298	0.666959	0.274262	-0.560696	-1.36235			0.522582	0.281846	0.54049	0.456526	0.655805			0.0069948	2.15522	0.0765284	1.53092	2.82658			0.961626	0.016994	0.977917	0.0397502	0.0483462			11.3319	10.8936	NaN	14.4378	7.92795	8.29598	NaN	14.18	NaN	11.2504	NaN	NaN	NaN	10.7983	NaN	14.8068	13.5486	NaN
P05090	APOD	Apolipoprotein D	Undefined	0.258556	0.587445	0.324433	0.118109	1.14849			6.50067e-05	4.18704	3.27869e-05	0.285973	4.34421		+	0.0143629	1.84276	0.118083	0.380631	2.49342			0.481893	0.31705	0.58603	0.0842879	0.705594			14.4761	14.8017	14.2346	14.1542	14.6085	14.9502	14.3911	14.4745	14.8572	14.5626	14.5144	13.9989	14.4289	14.7368	14.4874	15.1797	14.3115	14.8406
Q9BQE5	APOL2	Apolipoprotein L2	Undefined	0.0166983	1.77733	0.0223646	-0.112538	-2.51375		+	0.000110404	3.95702	6.29302e-05	-0.0952876	-4.18434		+	5.66939e-08	7.24646	9.77995e-06	0.481048	5.89087		+	0.134425	0.871519	0.200726	-0.100143	-1.50769			15.6989	15.5329	14.8083	15.3643	14.8872	14.5596	15.6055	15.6852	14.8819	14.8123	14.7225	15.1817	14.92	14.5636	14.7911	15.0309	15.5481	15.0931
Q9BUR5	APOO	MICOS complex subunit MIC26	Undefined	0.000624139	3.20472	0.000889552	-0.219036	-3.7692		+	0.018417	1.73478	0.017277	-0.18697	-2.43371		+	0.47148	0.326536	0.704796	-0.0827702	-0.72293			0.0317293	1.49854	0.0555504	-0.203515	-2.1748			15.3492	16.2159	15.0736	15.2462	15.3619	15.3707	15.2575	15.4021	15.4799	15.5905	15.3371	15.82	15.1711	15.237	15.6084	15.3514	15.3653	15.5437
Q9UKG1	APPL1	DCC-interacting protein 13-alpha	Undefined	0.482908	0.316136	0.559941	-0.0205017	-0.709184			0.023875	1.62206	0.0229089	0.0720125	2.32734		+	8.48414e-13	12.0714	0	0.356383	8.24748		+	0.00258253	2.58795	0.00545123	0.12063	3.08211		+	14.6136	14.4337	14.3154	13.8924	13.6348	14.3178	14.2079	13.9915	14.132	14.1115	14.4132	14.0413	14.3587	14.28	14.1285	14.1238	13.8696	14.2715
P07741	APRT	Adenine phosphoribosyltransferase	Undefined	0.321505	0.492813	0.391149	0.0589151	1.00561			1.66919e-06	5.77749	0	0.164507	5.40095		+	0.0072303	2.14084	0.0782428	-0.235092	-2.74531			0.0282856	1.54844	0.0499245	0.174294	2.22211		+	13.7189	13.0514	13.8921	13.3841	13.5228	13.6115	13.4441	13.2841	13.6378	13.4156	13.9429	13.1364	13.7086	13.4285	13.2819	13.7412	13.1814	13.7931
P55087	AQP4	Aquaporin-4	Undefined	0.00173903	2.75969	0.00229508	0.221888	3.39125		+	2.15655e-10	9.66624	0	0.343129	7.85531		+	0.000305186	3.51544	0.00986667	0.504657	3.74731		+	0.000884875	3.05312	0.00199149	0.410704	3.41563		+	16.3271	16.1993	15.0369	15.6164	15.2904	15.9615	15.4145	15.3827	16.0754	16.0953	16.4241	15.6049	14.9726	15.8286	15.2391	14.9439	15.2988	15.4059
P48444	ARCN1	Coatomer subunit delta	Undefined	0.239323	0.621015	0.303167	0.0732371	1.19707			0.00540207	2.26744	0.00459003	-0.0854031	-2.90363		+	0.654096	0.184358	0.823597	0.0313897	0.449483			0.723911	0.140315	0.803963	0.0189894	0.354118			13.5859	13.0195	13.2063	12.9415	13.4172	13.1402	13.0566	13.2434	12.9206	13.3759	13.3307	12.7075	12.8763	12.7681	12.7943	13.2724	12.8299	12.9037
P61204	ARF3	ADP-ribosylation factor 3	Undefined	3.26672e-08	7.48589	0	-0.225652	-7.05274		+	5.11588e-10	9.29108	0	-0.186841	-7.61882		+	0.207238	0.68353	0.474486	-0.0458848	-1.26976			2.95281e-08	7.52976	0	-0.183048	-5.95821		+	16.365	16.3775	16.1798	16.2345	16.2993	16.1733	16.071	16.2415	16.2582	16.2281	15.9577	16.2922	16.0559	16.0894	16.2624	16.186	16.3493	16.2108
P18085	ARF4	ADP-ribosylation factor 4	Undefined	0.588299	0.230402	0.664027	-0.0530501	-0.546339			0.00471738	2.3263	0.00400282	-0.104319	-2.95283		+	1.43113e-07	6.84432	8.81057e-06	-0.564918	-5.68085		+	6.95989e-11	10.1574	0	0.524567	7.2046		+	14.9968	14.8956	14.7481	14.7486	14.5505	14.2557	14.5388	14.3354	14.871	14.8963	14.8494	14.3709	14.5756	14.9116	14.5426	14.7004	14.7539	15.2924
P84085	ARF5	ADP-ribosylation factor 5	Undefined	0.224757	0.648287	0.285774	-0.0597564	-1.23582			0.00309495	2.50935	0.00250659	-0.128949	-3.10301		+	0.764958	0.116362	0.882722	-0.0156676	-0.299826			3.98777e-06	5.39927	1.72414e-05	-0.235618	-4.84939		+	13.582	13.6287	13.0257	13.3216	13.2235	13.0817	13.219	13.6041	13.1676	13.6306	13.1484	13.3016	13.0708	13.1958	13.474	13.3834	13.4631	13.39
Q8N6T3	ARFGAP1	ADP-ribosylation factor GTPase-activating protein 1	Undefined	4.84729e-05	4.3145	4.28266e-05	-0.192143	-4.6322		+	7.69101e-06	5.11402	4.88998e-06	-0.193527	-4.96842		+	0.763491	0.117196	0.88192	0.014325	0.301756			2.88207e-07	6.5403	1.17302e-05	-0.224531	-5.45815		+	14.334	14.7103	13.8441	14.0526	13.7247	13.7785	14.262	13.9349	14.1407	13.8431	13.9097	14.34	14.1033	14.2107	13.9267	13.9541	14.139	14.2606
Q8N6H7	ARFGAP2	ADP-ribosylation factor GTPase-activating protein 2	Undefined	0.0983866	1.00706	0.130605	-0.0788398	-1.69798			0.357679	0.446507	0.376928	-0.0257428	-0.928032			0.514571	0.288555	0.732748	0.0294607	0.654162			0.361768	0.44157	0.463194	-0.0350912	-0.915712			14.0684	13.9466	13.9279	13.9097	13.8173	13.8135	13.8935	13.872	13.8815	14.1302	13.923	14.1235	13.8287	13.783	13.9362	13.5835	13.6686	13.7106
Q9Y6D5	ARFGEF2	Brefeldin A-inhibited guanine nucleotide-exchange protein 2	Undefined	0.849825	0.0706705	0.884921	0.00954874	0.190748			0.0515404	1.28785	0.0528463	-0.111056	-1.99283			1.92311e-05	4.716	0.00114583	-0.315909	-4.49783		+	2.55495e-05	4.59262	5.45145e-05	-0.299087	-4.39083		+	14.5866	15.3513	14.8363	15.5621	15.5206	15.1025	14.9951	15.5317	15.492	15.1156	14.6238	15.0938	14.9547	14.8662	14.9472	15.3498	15.294	14.9941
P53365	ARFIP2	Arfaptin-2	Undefined	0.902346	0.0446267	0.926107	-0.0121818	-0.123591			0.000225276	3.64729	0.000163721	-0.161953	-3.965		+	0.831748	0.080008	0.919118	-0.0148495	-0.213039			0.68727	0.162872	0.770981	-0.0195754	-0.403599			14.0623	13.94	13.67	13.6901	13.549	13.7089	13.6397	13.5627	13.6546	13.3271	12.9473	13.7119	13.6889	13.5856	13.4157	13.7195	13.54	13.4203
Q07960	ARHGAP1	Rho GTPase-activating protein 1	Undefined	5.03889e-07	6.29766	0	-0.218267	-6.14086		+	0.000262608	3.58069	0.000200913	-0.091099	-3.91716		+	0.0476221	1.32219	0.226442	-0.0807419	-2.00644			0.101729	0.992553	0.158287	-0.0649765	-1.64995			14.6	14.8129	14.1529	14.2899	14.4795	14.2457	14.2798	14.4226	14.2873	14.6223	14.3963	14.4247	14.4539	14.3557	14.502	14.4348	14.3034	14.488
Q5T5U3	ARHGAP21	Rho GTPase-activating protein 21	Undefined	0.310821	0.50749	0.379969	-0.0669091	-1.02839			0.341443	0.466682	0.359855	-0.043273	-0.960111			0.66481	0.177303	0.830222	-0.0305252	-0.434625			0.530694	0.275156	0.635247	0.0349213	0.628884			13.2739	12.8651	12.4425	12.4957	12.4283	12.8098	12.909	12.1615	12.8288	12.8693	12.8498	12.939	12.7612	12.8279	12.7952	12.6024	12.6927	12.731
Q9P227	ARHGAP23	Rho GTPase-activating protein 23	Undefined	0.671227	0.17313	0.734911	-0.0263482	-0.428064			0.25433	0.594602	0.268267	0.132646	1.15465			3.97263e-05	4.40092	0.00204033	-0.274214	-4.31529		+	0.109179	0.961861	0.167869	-0.126079	-1.61511			12.7836	12.1811	11.2513	14.929	11.1713	13.0831	12.8403	13.1936	13.3286	13.5784	13.168	13.3195	12.7527	12.8567	13.0517	13.1492	13.2921	13.415
Q9UNA1	ARHGAP26	Rho GTPase-activating protein 26	Undefined	0.034799	1.45843	0.0476292	-0.171141	-2.19614		+	0.106201	0.97387	0.113473	-0.108363	-1.64461			4.43179e-06	5.35342	0.0004	-0.411439	-4.86761		+	0.00152816	2.81583	0.00342406	-0.250949	-3.24848		+	13.413	12.396	13.322	13.6607	13.0765	13.5171	13.6096	13.2408	14.0934	13.2118	13.5681	13.7102	13.512	13.5317	13.3945	13.4737	13.3856	13.2984
A7KAX9	ARHGAP32	Rho GTPase-activating protein 32	Undefined	0.00563668	2.24898	0.00707466	-0.147125	-2.94981		+	0.00429185	2.36736	0.00359004	-0.173667	-2.98688		+	3.92082e-07	6.40662	2.4e-05	0.33532	5.44826		+	0.425931	0.370661	0.530064	0.0468026	0.799062			13.7043	13.8734	13.3311	14.0656	14.0116	13.6241	13.4541	13.7029	13.4966	13.8284	13.7943	13.7034	13.5312	13.3889	13.5629	13.4404	13.4647	13.6763
Q9NRY4	ARHGAP35	Rho GTPase-activating protein 35	Undefined	0.699867	0.154985	0.759718	-0.0440823	-0.388681			0.100098	0.999576	0.106775	-0.132252	-1.67479			4.44651e-06	5.35198	0.000399395	-0.507544	-4.86679		+	0.146725	0.833495	0.21636	-0.10039	-1.46124			13.1505	12.5853	12.7825	13.1617	13.3379	12.7913	12.6323	12.9101	12.831	13.0554	12.7832	12.6071	12.5303	12.6147	12.6524	12.8614	12.8391	12.6284
Q9C0H5	ARHGAP39	Rho GTPase-activating protein 39	Undefined	0.193005	0.714431	0.247761	-0.108947	-1.32806			0.976159	0.0104795	0.97886	-0.00159735	-0.0300291			0.0452957	1.34394	0.220704	-0.140003	-2.02862			0.000446686	3.35	0.00101302	-0.166828	-3.61716		+	12.9057	12.9964	12.8537	13.2173	13.5528	13.1136	13.2729	13.4634	13.066	13.3676	13.326	13.5176	13.0894	13.4339	13.024	13.4175	13.4192	13.4341
Q17R89	ARHGAP44	Rho GTPase-activating protein 44	Neuron	0.0144674	1.83961	0.0192476	-0.116252	-2.57335		+	4.95528e-11	10.3049	0	-0.222921	-8.2599		+	0.000504096	3.29749	0.0141662	0.169847	3.60098		+	0.000293761	3.53201	0.000752224	-0.136124	-3.737		+	14.3429	14.3371	13.9649	14.1534	14.0629	14.1628	14.4648	14.318	14.0958	14.0719	13.9227	14.0988	14.2047	14.1564	13.9472	14.0576	14.0765	13.8328
P52565	ARHGDIA	Rho GDP-dissociation inhibitor 1	Undefined	0.585769	0.232274	0.662466	-0.0242868	-0.550064			0.184895	0.733074	0.196239	-0.0249396	-1.34365			0.94325	0.025373	0.972855	0.00447176	0.0713718			0.00190955	2.71907	0.00412915	-0.154578	-3.17858		+	16.1692	16.3748	16.2127	15.7459	15.9474	16.1522	16.3925	15.8448	16.139	15.7351	16.2379	15.9522	16.3645	16.34	16.1951	16.4451	15.99	16.1093
O15085	ARHGEF11	Rho guanine nucleotide exchange factor 11	Undefined	0.92868	0.032134	0.946159	0.00832454	0.0901526			0.962374	0.0166563	0.967348	-0.00422595	-0.0474029			0.000226777	3.6444	0.00791085	-0.398955	-3.83377		+	0.843639	0.0738431	0.894247	0.0192755	0.197698			11.4309	11.9834	12.5999	12.6978	12.3426	12.0657	12.2491	11.7554	12.0306	12.1328	12.4357	12.4653	12.0242	11.6328	11.8219	11.9254	11.68	11.9066
Q92974	ARHGEF2	Rho guanine nucleotide exchange factor 2	Undefined	3.78516e-05	4.42192	3.59551e-05	-0.180305	-4.71481		+	1.93472e-14	13.7134	0	-0.25154	-10.491		+	1.17797e-07	6.92887	9.04977e-06	0.297931	5.72528		+	1.02157e-05	4.99073	3.00188e-05	-0.216277	-4.62059		+	14.7207	14.6203	14.6143	14.5154	14.1872	14.3412	14.5205	14.5208	14.2842	14.4391	14.3613	14.3581	14.4079	14.117	14.4307	14.1226	14.312	14.1766
Q14155	ARHGEF7	Rho guanine nucleotide exchange factor 7	Ex	0.606403	0.217238	0.679037	-0.0183861	-0.519904			0.000624628	3.20438	0.00046661	-0.0934028	-3.64159		+	6.58568e-07	6.1814	9.82987e-05	0.209077	5.32677		+	7.75191e-05	4.11059	0.00023845	-0.141411	-4.1021		+	14.038	13.8819	13.6196	13.8864	13.9688	13.8722	13.923	13.6208	13.8008	13.7921	13.8506	13.6957	13.6792	13.9023	13.7733	13.8457	13.7817	13.6391
O43307	ARHGEF9	Rho guanine nucleotide exchange factor 9	Undefined	0.0107389	1.96904	0.0142992	-0.400195	-2.72055		+	0.000343632	3.46391	0.00025	-0.340824	-3.86788		+	2.04375e-05	4.68957	0.00120207	-0.50679	-4.48964		+	0.645891	0.189841	0.735557	0.0417943	0.460723			11.901	11.7841	10.3088	12.1071	12.7712	11.7847	12.0415	13.0681	12.2794	12.4016	11.4121	11.9552	11.9783	12.1155	12.2494	11.6332	12.0591	11.6674
P36404	ARL2	ADP-ribosylation factor-like protein 2	Undefined	0.690178	0.161039	0.751247	-0.0417006	-0.401933			0.231837	0.634817	0.244128	-0.0820788	-1.20977			0.000167756	3.77532	0.00641683	-0.476226	-3.91716		+	0.002372	2.62489	0.00502317	0.304367	3.10949		+	12.2102	13.1805	12.7196	13.1769	12.9678	13.1826	12.7111	12.9753	12.637	13.1062	13.3153	12.8471	13.0887	12.0665	12.6629	12.3543	12.5841	13.0103
O75915	ARL6IP5	PRA1 family protein 3	Ex	0.000313912	3.50319	0.000544262	-0.183312	-3.99811		+	0.000619536	3.20793	0.000464014	-0.134429	-3.64424		+	0.207493	0.682996	0.474636	0.0748527	1.26905			0.0745605	1.12749	0.120794	0.0899608	1.7998			14.4779	14.7952	14.3023	14.1501	13.7337	14.1032	14.0348	13.8656	14.1339	14.2199	14.0841	14.2919	14.0678	13.9575	14.3403	14.2601	14.1204	14.2173
Q8N2F6	ARMC10	Armadillo repeat-containing protein 10	Undefined	0.111532	0.952601	0.147289	-0.118579	-1.63254			0.135774	0.867184	0.145002	-0.071836	-1.51521			0.026622	1.57476	0.165657	-0.149702	-2.25168			0.00412365	2.38472	0.00854091	-0.176784	-2.92824		+	12.5539	12.9542	12.6455	12.642	12.7474	12.2724	12.6748	12.6409	12.5905	12.8084	12.424	12.674	12.5136	12.7725	12.7676	12.3169	12.7096	12.8327
Q9UH62	ARMCX3	Armadillo repeat-containing X-linked protein 3	Undefined	0.0011815	2.92757	0.00155851	0.177889	3.56064		+	0.292245	0.534253	0.307569	0.194942	1.06932			1.4848e-05	4.82833	0.000935829	0.367262	4.62113		+	0.0831751	1.08001	0.132002	-0.256337	-1.75395			13.3811	13.5746	15.6501	15.6664	13.8747	15.3779	13.4526	15.7026	15.4533	11.5106	15.6103	13.8258	13.7028	13.6229	15.472	15.3974	15.6705	15.0029
O15143	ARPC1B	Actin-related protein 2/3 complex subunit 1B	Undefined	0.262784	0.580401	0.329236	0.198363	1.13991			0.804669	0.0943827	0.824692	0.103771	0.24884			0.00330642	2.48064	0.0487227	-0.515485	-3.02635		+	0.234738	0.629417	0.322493	-0.399554	-1.19592			1.54213	16.1415	15.385	15.0787	13.9993	16.5346	13.4102	15.3693	7.82401	14.9822	14.7951	14.8292	14.8742	15.0776	13.5944	14.9046	14.243	13.9161
O15144	ARPC2	Actin-related protein 2/3 complex subunit 2	Undefined	0.290725	0.536518	0.358735	0.0370241	1.07275			3.46581e-08	7.4602	0	0.14041	6.46961		+	0.113761	0.944006	0.35297	0.102619	1.59607			0.770363	0.113305	0.840497	-0.0143867	-0.292602			14.3175	14.2879	14.0336	13.9371	14.0824	14.3593	14.171	13.9986	14.0774	14.0683	14.1301	13.8741	14.2812	14.2563	14.0367	13.9206	13.8486	14.1241
O15145	ARPC3	Actin-related protein 2/3 complex subunit 3	Undefined	0.36498	0.437731	0.438023	0.0539626	0.91785			7.18719e-07	6.14344	0	0.14604	5.63604		+	0.397343	0.400834	0.648118	-0.0457974	-0.850175			0.293818	0.531922	0.38949	-0.0423161	-1.05469			16.6341	16.7956	16.1249	16.0632	16.1943	16.5295	16.3089	15.7997	16.1493	15.9341	16.4891	16.2834	16.2562	16.6164	16.2734	16.1574	15.8876	16.0668
P59998	ARPC4	Actin-related protein 2/3 complex subunit 4	Undefined	9.62561e-05	4.01657	9.39335e-05	0.195524	4.40169		+	1.14421e-05	4.9415	4.78469e-06	0.209081	4.85428		+	0.4029	0.394802	0.65269	0.0569325	0.840171			0.00138647	2.85809	0.00308583	0.178566	3.27868		+	16.2292	16.2207	16.7823	16.2355	16.1685	16.2348	16.1316	16.0083	16.0925	16.0446	16.3398	15.8817	16.17	16.1502	16.008	16.0603	15.9256	16.1432
O15511	ARPC5	Actin-related protein 2/3 complex subunit 5	Undefined	0.00810269	2.09137	0.0105852	0.285006	2.80773		+	1.45295e-07	6.83775	0	0.496039	6.07737		+	3.50875e-05	4.45485	0.00185766	0.580491	4.34131		+	0.0979673	1.00892	0.153089	0.245561	1.66859			14.3081	14.2993	14.1248	13.5461	13.8338	14.4044	13.9293	13.4954	13.8363	14.1365	14.3041	13.3839	14.2175	14.2539	14.2505	14.0769	13.6841	14.4893
Q9BPX5	ARPC5L	Actin-related protein 2/3 complex subunit 5-like protein	Undefined	0.323018	0.490774	0.392424	0.0358623	1.00243			0.425357	0.371246	0.444472	0.0249822	0.803476			0.0171073	1.76682	0.130126	-0.195575	-2.4266			0.0130428	1.88463	0.0245262	-0.173473	-2.52254		+	14.3077	14.0413	14.8976	14.3244	14.6607	14.4418	14.1309	14.4472	14.6783	14.1821	14.4754	13.9555	14.5211	14.1087	14.3682	14.1465	14.6846	14.304
Q7Z6K5-2	ARPIN	Arpin	Undefined	0.317169	0.498709	0.386518	0.0660488	1.01479			0.376286	0.424482	0.394145	0.0956495	0.892408			0.0351447	1.45414	0.193552	0.132458	2.13694			0.0137935	1.86033	0.025788	0.238616	2.50166		+	14.1554	14.7289	14.3018	15.0886	13.8414	14.6062	13.9309	13.8465	17.2104	14.7704	15.1606	15.1413	14.5589	14.5684	14.1911	14.3737	14.625	14.8014
P56211	ARPP19	cAMP-regulated phosphoprotein 19	Undefined	0.0544844	1.26373	0.0733197	-0.173198	-1.98968			0.161417	0.79205	0.171964	-0.0966407	-1.42055			0.297071	0.527139	0.565063	-0.105718	-1.04843			0.0103457	1.98524	0.0198104	-0.254461	-2.60771		+	13.7999	14.0677	12.8259	13.2059	13.0139	13.6389	13.9837	13.2907	13.1219	13.4758	13.2693	13.6468	13.4277	12.6378	13.6343	12.824	12.6444	12.658
P49407	ARRB1	Beta-arrestin-1	Undefined	0.941866	0.0260108	0.957304	0.00535764	0.0734499			0.0756597	1.12114	0.0802664	0.0761735	1.81265			2.03976e-05	4.69042	0.00120363	0.314975	4.48264		+	1.78983e-05	4.74719	5.6042e-05	0.270074	4.4809		+	14.2725	13.9749	13.8356	13.5424	13.7486	14.1688	14.0754	13.5681	14.0201	13.5799	14.3503	13.7745	14.356	14.1297	13.8811	13.9712	13.9847	14.0124
P15289	ARSA	Arylsulfatase A	Undefined	0.295871	0.528897	0.364371	0.116179	1.06453			0.0109856	1.95918	0.00999742	0.264593	2.65292		+	0.629742	0.200837	0.807807	-0.0530611	-0.483763			0.70575	0.151349	0.786613	-0.0340343	-0.378599			12.892	12.7196	12.5824	12.9538	12.9818	12.3816	12.885	13.1826	13.4681	14.5705	13.8773	13.1763	13.6145	13.381	13.5047	13.6102	13.2961	12.0885
O00192	ARVCF	Splicing regulator ARVCF	Undefined	0.406728	0.390695	0.48223	-0.078862	-0.840087			0.0890993	1.05013	0.0949093	0.104576	1.73533			0.27325	0.56344	0.541524	0.0995831	1.10199			0.0875627	1.05768	0.137922	0.181546	1.72375			12.9593	13.2167	10.9949	12.6983	12.3724	13.2645	13.0792	12.584	13.013	12.964	13.3726	12.9369	13.3133	13.5177	12.5205	12.8222	12.592	13.2426
P45381	ASPA	Aspartoacylase	Undefined	0.91203	0.0399907	0.933764	-0.0172561	-0.111328			0.896918	0.0472474	0.908286	0.0143669	0.130244			0.00529115	2.27645	0.0650816	-0.448651	-2.86624			0.118067	0.927872	0.180233	-0.225789	-1.57651			13.7275	12.1822	12.2837	10.4556	11.993	13.4994	12.5493	11.9042	13.007	13.4856	13.3465	12.6734	13.772	12.994	12.9591	12.8056	13.0323	13.5421
Q53RT3	ASPRV1	Retroviral-like aspartic protease 1	Undefined	0.231662	0.635145	0.29445	-0.206851	-1.28265			0.828124	0.0819049	0.847307	0.0573281	0.219225			0.0491088	1.30884	0.230348	0.304405	2.00839			0.0906108	1.04282	0.142181	-0.404272	-1.71368			15.3891	15.0143	NaN	NaN	14.7393	12.429	14.753	10.8817	15.9628	15.7783	NaN	NaN	NaN	15.0445	15.9499	12.3512	13.3014	NaN
Q9BZE9	ASPSCR1	Tether containing UBX domain for GLUT4	Undefined	0.816371	0.0881124	0.857066	0.0328318	0.237374			0.885631	0.0527472	0.898593	-0.03829	-0.146302			0.293311	0.532672	0.562338	0.299026	1.06903			0.454712	0.342264	0.557852	0.229134	0.757412			NaN	12.4702	NaN	11.7851	NaN	11.3235	NaN	10.6511	NaN	12.3892	12.8565	11.6493	NaN	12.2742	NaN	11.7361	NaN	12.5845
Q7L266	ASRGL1	Isoaspartyl peptidase/L-asparaginase	Undefined	0.315148	0.501486	0.384307	0.0834253	1.0191			0.0132796	1.87682	0.0121242	0.08176	2.56391		+	0.340117	0.468372	0.602352	-0.0874944	-0.958703			1.09757e-08	7.95957	0	0.445499	6.16916		+	14.4738	15.1906	14.7924	14.3472	14.6522	15.0924	14.8642	14.0851	14.6357	14.4677	15.0021	13.8922	15.0842	14.8425	14.482	14.7298	14.6969	15.0305
P00966	ASS1	Argininosuccinate synthase	Undefined	0.0573518	1.24145	0.0776538	-0.166035	-1.96729			0.444386	0.352239	0.462682	0.0449546	0.770913			0.0459575	1.33764	0.222515	0.236124	2.02229			0.000228166	3.64175	0.000572178	0.385897	3.81146		+	13.9847	13.7529	13.6311	13.6217	13.9577	13.8103	13.4622	13.989	13.454	13.7533	13.7526	13.7396	13.6947	13.7698	13.1504	13.7402	13.7968	13.744
O14525	ASTN1	Astrotactin-1	In	0.921108	0.0356893	0.941049	0.0155681	0.0999346			0.418717	0.378079	0.437485	-0.0726954	-0.815388			9.22278e-05	4.03514	0.00405139	-0.514587	-4.09029		+	0.0670938	1.17332	0.10982	0.166706	1.84917			12.0745	12.5548	12.0669	11.9169	12.5995	12.2333	12.2617	12.2647	12.503	12.2296	12.5115	12.3668	12.6287	12.2913	12.0082	11.98	11.6173	11.4414
Q8NBU5	ATAD1	Outer mitochondrial transmembrane helix translocase	Undefined	0.349803	0.456176	0.42133	-0.0901164	-0.95032			0.983002	0.00744539	0.985848	-0.00302249	-0.0214576			0.0557959	1.2534	0.246014	0.251492	1.93951			0.00234114	2.63057	0.00495717	-0.438271	-3.12562		+	12.0055	12.4769	NaN	14.0391	NaN	12.1503	12.413	12.2822	11.9763	12.353	14.1676	11.6357	11.786	11.8286	10.884	12.3416	14.5915	11.5285
Q9NVI7	ATAD3A	ATPase family AAA domain-containing protein 3A	Undefined	0.564698	0.248184	0.640784	0.0160595	0.581399			0.10413	0.982425	0.111218	0.052903	1.65411			0.0649723	1.18727	0.265276	0.0764944	1.86686			0.0811053	1.09095	0.129187	-0.066083	-1.76005			14.6906	14.6031	14.3669	14.2133	14.2949	14.0628	14.3709	13.9763	14.402	14.3541	14.2264	14.3347	14.2548	14.193	14.371	14.1948	14.2252	14.3406
Q5SQI0	ATAT1	Alpha-tubulin N-acetyltransferase 1	Undefined	0.59951	0.222203	0.672787	-0.0182759	-0.529924			0.0749459	1.12525	0.0792067	0.0597774	1.81723			0.00032979	3.48176	0.0104748	0.167364	3.72494		+	0.00119413	2.92295	0.00262997	-0.156543	-3.32466		+	14.8632	14.6129	14.5253	14.6313	14.4294	14.608	14.5987	14.5997	14.355	14.4094	14.5652	14.6788	14.5452	14.447	14.5087	14.4423	14.4013	14.333
Q86WG3	ATCAY	Caytaxin	Neuron	0.397895	0.400232	0.474449	-0.0443951	-0.855864			0.456125	0.340916	0.474726	-0.0214097	-0.750854			8.64832e-05	4.06307	0.00384	0.18902	4.10002		+	4.76711e-13	12.3217	0	-0.314104	-8.17681		+	15.1018	15.1936	14.8243	14.7863	14.6019	14.8281	15.0593	14.7308	14.7803	14.4922	14.9177	15.228	14.9441	15.0243	14.9542	14.8641	14.6749	14.8673
Q9NT62	ATG3	Ubiquitin-like-conjugating enzyme ATG3	Undefined	0.73401	0.134298	0.789513	-0.0919207	-0.342598			0.16856	0.773246	0.179417	-0.0625183	-1.39629			2.76031e-05	4.55904	0.00156328	-0.569509	-4.40415		+	0.0101919	1.99175	0.0195801	0.14428	2.61315		+	12.6908	13.2143	12.7138	12.4098	12.9365	13.218	13.1479	12.7471	12.9792	13.4442	13.2571	12.748	12.9014	13.1173	13.196	13.1061	13.2072	12.7645
Q9Y4P1	ATG4B	Cysteine protease ATG4B	Undefined	0.544396	0.264085	0.621043	0.0582628	0.613396			0.901494	0.045037	0.912737	-0.00808636	-0.124444			0.0016562	2.78089	0.0313492	-0.405138	-3.24154		+	0.00330237	2.48117	0.00697609	0.278516	3.00313		+	12.5181	12.5414	12.1368	12.2301	12.3871	12.568	12.1664	11.6872	11.801	11.7184	12.0318	12.4907	12.3636	12.8255	12.3481	12.793	12.7699	11.6545
P31939	ATIC	Bifunctional purine biosynthesis protein ATIC	Undefined	0.982252	0.0077769	0.987209	0.000661532	0.0224047			0.334581	0.475498	0.353511	0.0198359	0.973969			0.11634	0.934269	0.357559	-0.0704355	-1.58462			0.0541697	1.26624	0.0912285	0.0815426	1.94574			15.1305	14.9499	14.9179	14.9163	15.1621	14.8439	14.9275	14.8802	14.7908	15.0583	15.4796	14.811	15.2227	15.141	14.9086	14.8899	14.9308	15.3252
Q8WXF7	ATL1	Atlastin-1	Ex	1.05078e-05	4.97849	1.06952e-05	-0.260584	-5.13991		+	7.42009e-12	11.1296	0	-0.237707	-8.78716		+	0.000368503	3.43356	0.0113964	0.227179	3.69277		+	0.30225	0.519634	0.398139	-0.0510074	-1.03635			15.5065	15.7721	15.182	15.045	15.0938	15.1631	15.4594	15.1199	15.2351	15.407	15.025	15.095	15.4758	15.2446	15.4069	15.0026	14.9905	15.2456
O00244	ATOX1	Copper transport protein ATOX1	Undefined	0.644349	0.190879	0.712325	-0.037222	-0.465653			0.961542	0.0170318	0.966684	0.0023001	0.0484518			0.311765	0.506173	0.579016	-0.102294	-1.01688			0.105932	0.974972	0.163204	0.133211	1.62978			15.0846	15.2581	14.32	14.4972	14.8	15.271	15.077	14.7843	14.7664	14.6666	15.1608	14.8646	14.5762	14.5369	14.1672	14.0406	14.4808	14.2704
P54707	ATP12A	Potassium-transporting ATPase alpha chain 2	Undefined	#VALUE!	NaN	1	0	NaN			#VALUE!	NaN	1	0	NaN			#VALUE!	NaN	1	0	NaN			#VALUE!	NaN	1	0	NaN			NaN	NaN	NaN	NaN	NaN	NaN	NaN	NaN	NaN	NaN	NaN	NaN	NaN	NaN	NaN	NaN	NaN	NaN
P05023	ATP1A1	Sodium/potassium-transporting ATPase subunit alpha-1	Neuron	3.1909e-14	13.4961	0	-0.329771	-12.2587		+	1.35774e-20	19.8672	0	-0.337444	-15.0521		+	5.75112e-06	5.24025	0.000460177	0.256534	4.80311		+	0.00169243	2.77149	0.00373178	-0.13344	-3.21658		+	19.789	19.982	19.3904	19.2039	19.141	19.5731	19.6385	19.3	19.5936	19.285	19.2272	19.5444	19.6094	19.6702	19.6034	19.5699	19.4675	19.4673
P50993	ATP1A2	Sodium/potassium-transporting ATPase subunit alpha-2	Undefined	0.981756	0.00799665	0.986955	-0.000627571	-0.0230321			0.00577065	2.23878	0.00493453	0.0657323	2.8795		+	0.0237946	1.62352	0.15543	0.114228	2.29695			2.96387e-06	5.52814	8.81057e-06	-0.199164	-4.92024		+	17.9999	18.062	17.6383	17.6159	17.7181	17.8117	17.7817	17.4771	18.0924	17.7225	17.8621	17.9032	17.8444	18.0235	18.11	17.7663	17.8271	17.8702
P13637	ATP1A3	Sodium/potassium-transporting ATPase subunit alpha-3	Undefined	7.20542e-16	15.1423	0	-0.333402	-13.9576		+	2.49275e-23	22.6033	0	-0.41762	-17.3964		+	0.20244	0.693705	0.468394	0.0580389	1.28341			0.0642262	1.19229	0.105921	-0.0642784	-1.8689			17.6698	17.7909	17.0224	17.1523	17.0864	17.4964	17.5328	17.1952	17.4399	17.2286	17.0919	17.4307	17.464	17.5513	17.5503	17.3778	17.343	17.2268
Q13733	ATP1A4	Sodium/potassium-transporting ATPase subunit alpha-4	Undefined	0.0975167	1.01092	0.12951	-0.106365	-1.70256			0.0127241	1.89537	0.0115796	-0.0528578	-2.58063		+	0.0265033	1.5767	0.165405	0.117755	2.25349			0.0201827	1.69502	0.0367984	-0.113641	-2.35625		+	18.4001	18.7591	18.2305	18.4571	18.3546	18.4421	18.3841	18.3421	18.6449	18.2866	18.3371	18.3046	18.3313	18.4298	18.4826	18.3714	18.5054	18.2813
P05026	ATP1B1	Sodium/potassium-transporting ATPase subunit beta-1	Neuron	1.92475e-15	14.7156	0	-0.496259	-13.5029		+	6.92495e-25	24.1596	0	-0.531047	-18.8382		+	0.261368	0.582748	0.531291	-0.0817434	-1.12982			0.00043855	3.35798	0.00101308	-0.195081	-3.62247		+	19.5748	19.932	18.7104	19.1037	18.9921	19.4276	19.4465	19.163	19.4156	19.3172	19.0376	19.4476	19.4294	19.6568	19.5047	19.4906	19.3379	19.2694
P14415	ATP1B2	Sodium/potassium-transporting ATPase subunit beta-2	Undefined	0.416655	0.380224	0.493037	-0.0485206	-0.821977			0.947945	0.0232167	0.954852	0.00149957	0.0656031			0.0546526	1.26239	0.243324	0.139603	1.9454			8.87142e-05	4.05201	0.000271386	-0.228144	-4.06612		+	14.5108	14.8062	14.4226	14.5201	14.6289	14.5302	14.6049	14.4026	14.7814	14.7025	14.5194	14.911	14.6637	14.6834	14.7565	14.4206	14.6365	14.5897
P54709	ATP1B3	Sodium/potassium-transporting ATPase subunit beta-3	Ex	0.169919	0.769758	0.21994	-0.142985	-1.40313			0.985526	0.00633201	0.987421	-0.00204273	-0.0182309			0.00129983	2.88611	0.0267959	0.326753	3.31468		+	0.848236	0.0714832	0.898066	-0.020861	-0.191817			11.7806	11.6276	12.7782	14.3495	14.0508	14.9596	14.3833	14.1664	14.4529	13.7266	14.3214	14.3889	14.4931	14.4469	13.636	13.8903	14.0722	14.0627
P16615	ATP2A2	Sarcoplasmic/endoplasmic reticulum calcium ATPase 2	Undefined	1.43776e-10	9.84231	0	-0.217258	-8.94586		+	4.63646e-16	15.3338	0	-0.196449	-11.613		+	0.000319604	3.49539	0.0102026	0.145205	3.734		+	6.64204e-09	8.1777	0	-0.199714	-6.27497		+	17.4422	17.7126	17.2106	17.0844	17.3068	17.4724	17.3555	17.3264	17.2748	17.1852	17.1009	17.0903	17.2762	17.1667	17.3806	17.0601	17.1957	17.0903
P20020-4	ATP2B1	Plasma membrane calcium-transporting ATPase 1	Undefined	9.71504e-16	15.0126	0	-0.375701	-13.8182		+	4.90493e-20	19.3094	0	-0.379482	-14.6012		+	5.00318e-08	7.30075	1.01266e-05	0.237461	5.91898		+	0.016125	1.7925	0.029577	-0.0958817	-2.44274		+	17.4632	17.7293	17.3145	17.096	17.1358	17.4112	17.4349	17.0711	17.2338	17.1196	17.3266	17.2078	17.4733	17.4029	17.3174	17.3173	17.1479	17.2515
Q01814-2	ATP2B2	Plasma membrane calcium-transporting ATPase 2	Undefined	0.000992493	3.00327	0.00139945	-0.302952	-3.59384		+	5.14016e-06	5.28902	5.03145e-06	-0.286779	-5.08344		+	0.00629391	2.20108	0.0723559	0.283014	2.79354			0.657386	0.182179	0.745732	-0.0396251	-0.444701			14.2204	15.049	14.0778	14.6373	14.3008	14.7138	15.1325	14.974	14.7599	14.7707	14.6451	14.9205	14.8592	15.164	14.8912	14.7676	15.2176	14.8328
Q01814	ATP2B2	Plasma membrane calcium-transporting ATPase 2	Undefined	9.55696e-12	11.0197	0	-0.409359	-9.95428		+	2.56947e-17	16.5902	0	-0.400883	-12.5181		+	0.0648241	1.18826	0.265159	0.114689	1.86792			3.49542e-05	4.4565	6.51466e-05	-0.208607	-4.31055		+	16.56	16.743	16.0799	16.0692	15.8756	16.4635	16.4663	16.2084	16.4511	16.1649	16.3598	16.2497	16.4249	16.5816	16.4282	16.3281	16.421	16.3151
Q16720-2	ATP2B3	Plasma membrane calcium-transporting ATPase 3	Undefined	1.01692e-09	8.99271	0	-0.352191	-8.24651		+	6.47665e-18	17.1886	0	-0.329785	-12.9613		+	0.000217912	3.66172	0.00776241	0.223763	3.8435		+	0.84046	0.0754832	0.892662	-0.00937959	-0.20177			16.3234	16.6954	16.1451	16.2053	16.2859	16.4444	16.3551	16.1644	16.317	16.4471	16.2699	16.277	16.2881	16.4285	15.9917	16.3787	16.4075	16.3679
P23634	ATP2B4	Plasma membrane calcium-transporting ATPase 4	Undefined	1.03329e-14	13.9858	0	-0.273266	-12.7488		+	7.26019e-20	19.1391	0	-0.331795	-14.4653		+	1.75078e-08	7.75677	1.12994e-05	0.250211	6.15297		+	0.0304987	1.51572	0.0536408	0.0859046	2.19108			16.6593	16.9516	16.7497	16.5387	16.8356	16.8563	16.6739	16.5574	16.4228	16.6011	16.6548	16.5129	16.7986	16.6634	16.3709	16.6966	16.5332	16.5378
P25705	ATP5F1A	ATP synthase subunit alpha, mitochondrial	Undefined	0.00393325	2.40525	0.00516274	0.127669	3.08769		+	0.00233095	2.63247	0.00184778	0.0748624	3.20182		+	7.13361e-11	10.1467	0	0.310177	7.33273		+	4.51236e-05	4.3456	0.000101106	-0.160452	-4.24443		+	19.6844	19.8556	19.9791	19.6397	19.6625	19.7558	19.8332	19.6023	19.8657	19.615	19.9019	19.8589	19.9619	19.7381	19.5912	19.9086	19.8231	19.6001
P06576	ATP5F1B	ATP synthase subunit beta, mitochondrial	Undefined	0.126976	0.896277	0.167256	0.0608232	1.56331			0.101205	0.994799	0.107869	0.0428466	1.66861			0.149001	0.826811	0.403034	0.0510343	1.45475			9.77523e-12	11.0099	0	-0.23138	-7.59176		+	19.373	19.5539	19.4278	19.1784	19.2091	19.2649	19.4073	19.2293	19.3796	19.1208	19.3701	19.4361	19.4931	19.4416	19.4425	19.3679	19.3967	19.1742
P36542	ATP5F1C	ATP synthase subunit gamma, mitochondrial	Undefined	0.32916	0.482593	0.399273	0.0372268	0.989605			0.496535	0.30405	0.513944	0.019069	0.684762			6.27883e-05	4.20212	0.00289562	0.240508	4.18661		+	0.0769151	1.11399	0.123661	0.0874173	1.78518			16.8557	17.3122	17.3282	16.6542	16.8818	17.0226	17.0306	16.7463	17.0234	16.8783	17.0147	16.7432	17.0388	16.8794	16.9019	16.8972	16.7669	16.822
P30049	ATP5F1D	ATP synthase subunit delta, mitochondrial	Undefined	0.23178	0.634924	0.294451	0.0890458	1.21691			0.000239643	3.62043	0.000170213	0.118031	3.94574		+	1.83914e-07	6.73538	1.72043e-05	0.547186	5.62338		+	0.00709456	2.14907	0.0141075	0.164742	2.74236		+	17.2988	17.3135	17.6222	17.0438	17.174	17.1794	17.4187	17.0664	17.345	17.0036	17.3009	17.3039	17.4402	17.2612	17.1963	17.403	17.363	17.1246
P56381	ATP5F1E	ATP synthase subunit epsilon, mitochondrial	Undefined	0.146827	0.833194	0.192467	0.0652436	1.48374			0.542393	0.265686	0.560588	0.0242713	0.613236			2.71498e-06	5.56623	0.000292528	0.298741	4.98769		+	0.983665	0.00715269	0.993295	-0.00114989	-0.0205194			15.4254	15.465	15.4438	15.4383	15.2936	14.7531	14.9588	15.2968	15.4132	15.6645	14.9276	15.1974	15.1137	14.9874	14.9121	15.3973	15.3145	15.0816
P56385	ATP5ME	ATP synthase subunit e, mitochondrial	Undefined	0.601769	0.22057	0.674024	0.0452237	0.526635			0.850571	0.0702896	0.869127	0.00904519	0.189331			0.37521	0.425725	0.629859	0.0711276	0.8909			0.729912	0.136729	0.807801	-0.0276859	-0.346099			15.9557	16.4731	15.6166	15.3629	15.3676	15.7048	15.8613	15.7324	15.8756	15.7337	15.6703	15.8976	15.7248	15.748	16.022	15.8164	15.4813	15.7572
P56134-2	ATP5MF	ATP synthase subunit f, mitochondrial	Undefined	0.301977	0.520026	0.370716	0.0522695	1.04766			0.380945	0.419138	0.398777	-0.0240612	-0.883664			0.0259527	1.58582	0.163494	0.159956	2.262			0.585294	0.232626	0.68701	-0.0216478	-0.547239			14.8197	15.3376	15.3192	14.9431	14.9126	15.1855	15.1138	15.0957	15.2914	14.9397	15.2741	15.2251	15.2702	15.0723	15.2434	15.1885	15.1717	15.0803
O75964	ATP5MG	ATP synthase subunit g, mitochondrial	Undefined	0.0185461	1.73175	0.0248027	-0.0969169	-2.46967		+	0.0166085	1.77967	0.015517	-0.093931	-2.4753		+	0.0190063	1.7211	0.137975	-0.142244	-2.38577			0.00380635	2.41949	0.00796856	-0.161236	-2.95496		+	16.2013	16.6858	15.9355	15.9501	16.0079	15.9453	15.8739	15.8837	16.2123	16.2963	16.0991	16.1109	15.9439	16.0013	15.8675	16.2113	16.0435	16.3827
Q96IX5	ATP5MK	ATP synthase membrane subunit K, mitochondrial	Undefined	0.641134	0.193051	0.708558	-0.056422	-0.470578			0.598096	0.223229	0.617845	0.040404	0.530904			0.708332	0.149763	0.852573	-0.0623332	-0.375325			0.00404368	2.39322	0.00841905	-0.479052	-2.94074		+	12.8204	13.6081	NaN	12.6464	12.3353	12.4306	12.7583	12.8034	13.1867	13.4769	13.1367	13.1429	12.72	12.4286	12.7866	13.6708	13.1578	12.4528
P24539	ATP5PB	ATP synthase F(0) complex subunit B1, mitochondrial	Undefined	0.533514	0.272854	0.610379	-0.0253877	-0.628875			0.855339	0.0678619	0.872255	-0.00665074	-0.183219			4.6349e-06	5.33396	0.000403614	0.411816	4.85655		+	0.563814	0.248864	0.666859	-0.0422597	-0.578892			15.1585	15.7942	14.4423	14.4721	14.7222	14.6417	15.1563	14.5007	14.9866	15.0434	14.8062	14.2983	14.8519	15.0023	14.7403	14.8849	14.5725	14.9417
O75947	ATP5PD	ATP synthase subunit d, mitochondrial	Undefined	0.0137977	1.86019	0.0185059	0.0974804	2.5929		+	0.556825	0.254281	0.575166	0.0206388	0.591384			0.0331023	1.48014	0.18704	0.169624	2.16202			0.384946	0.4146	0.487458	-0.0584793	-0.872205			15.5662	16.2052	15.1268	14.9393	15.0037	15.5072	15.4063	15.1552	15.3123	15.1794	15.3042	14.6749	15.2228	15.4642	15.2588	15.6024	15.0541	15.2256
P18859	ATP5PF	ATP synthase-coupling factor 6, mitochondrial	Undefined	0.894407	0.0484646	0.921055	0.00554419	0.133698			0.0896066	1.04766	0.0953367	0.046832	1.72975			0.534446	0.272096	0.745914	0.0329525	0.623482			2.37161e-05	4.62496	5.48885e-05	-0.239502	-4.40977		+	14.7478	15.1279	14.4157	14.6403	14.4999	14.568	14.7676	14.5582	14.6114	14.4883	14.5902	14.521	14.8358	14.8275	14.6585	14.8349	14.5821	14.6156
P48047	ATP5PO	ATP synthase subunit O, mitochondrial	Undefined	0.02486	1.6045	0.0337023	0.0990688	2.3444		+	0.437416	0.359106	0.456048	0.0231499	0.782593			8.21583e-10	9.08535	0	0.48839	6.81683		+	0.195077	0.709794	0.278177	-0.0996857	-1.30343			17.0411	16.9367	17.1912	16.9159	17.0624	16.8712	16.9676	17.0584	16.9299	16.9652	16.9779	16.9365	17.0633	16.8858	16.9535	16.9815	17.0091	16.3382
Q93050	ATP6V0A1	V-type proton ATPase 116 kDa subunit a 1	Neuron	0.00247246	2.60687	0.00337198	-0.0837666	-3.26178		+	0.663747	0.177997	0.683789	0.011556	0.437241			0.0154289	1.81166	0.122661	-0.0846186	-2.46621			7.84215e-16	15.1056	0	-0.366205	-9.39076		+	17.7247	18.0434	17.312	17.5377	17.4317	17.4405	17.6113	17.3842	17.5688	17.2658	17.5006	17.784	17.5844	17.619	17.7934	17.6897	17.4982	17.6257
P61421	ATP6V0D1	V-type proton ATPase subunit d 1	Undefined	0.000592117	3.22759	0.000854135	-0.166856	-3.77693		+	0.295841	0.528941	0.31166	-0.0266886	-1.05602			0.990368	0.00420329	0.996683	0.000712472	0.0121034			4.57714e-08	7.33941	0	-0.310198	-5.86366		+	18.0882	18.484	17.7806	17.7047	17.7487	17.7654	17.9186	17.6986	17.865	17.7719	17.6379	18.0106	17.7254	18.0265	18.0799	17.9607	17.7086	17.6693
P38606	ATP6V1A	V-type proton ATPase catalytic subunit A	Neuron	1.52391e-06	5.81704	0	-0.111706	-5.77597		+	5.70756e-05	4.24355	2.47678e-05	-0.0751169	-4.38314		+	1.03959e-07	6.98314	9.15332e-06	0.167339	5.75372		+	2.2896e-08	7.64024	0	-0.156733	-6.01276		+	17.9577	18.007	17.9145	17.5856	17.5259	17.8209	17.8467	17.7498	17.698	17.5421	17.5721	17.92	17.9461	17.8266	17.8666	17.7875	17.7373	17.4568
P21281	ATP6V1B2	V-type proton ATPase subunit B, brain isoform	Neuron	0.0448766	1.34798	0.0612855	-0.0567978	-2.08038			0.0108955	1.96275	0.00994951	-0.0537336	-2.64081		+	4.94292e-05	4.30602	0.00243801	0.138662	4.25061		+	0.0010735	2.9692	0.00241408	-0.0927843	-3.35718		+	18.2004	18.208	18.1914	17.8767	17.9218	18.0264	18.1427	18.0444	17.9765	17.7959	17.9162	18.1062	18.1449	18.0651	18.0691	18.178	17.993	17.7821
P21283	ATP6V1C1	V-type proton ATPase subunit C 1	Undefined	0.000382626	3.41723	0.0006272	-0.12684	-3.92952		+	5.17599e-05	4.28601	2.08986e-05	-0.0924405	-4.41229		+	1.36342e-05	4.86537	0.000875676	0.188741	4.58597		+	0.234382	0.630075	0.322189	0.0398583	1.19553			16.0042	16.3077	15.7515	15.7297	15.8213	15.8214	15.9322	15.9639	15.8223	15.6101	15.8062	15.5957	15.9028	16.0164	15.682	15.972	15.7679	15.9004
Q8NEY4	ATP6V1C2	V-type proton ATPase subunit C 2	Undefined	#VALUE!	NaN	1	0	NaN			#VALUE!	NaN	1	0	NaN			#VALUE!	NaN	1	0	NaN			#VALUE!	NaN	1	0	NaN			NaN	NaN	NaN	NaN	NaN	NaN	NaN	NaN	NaN	NaN	NaN	NaN	NaN	NaN	NaN	NaN	NaN	NaN
Q9Y5K8	ATP6V1D	V-type proton ATPase subunit D	Undefined	0.452261	0.344611	0.529253	0.023861	0.760141			0.0522983	1.28151	0.0536603	0.0496871	1.98616			0.00870866	2.06005	0.0872128	0.10069	2.67818			0.0162831	1.78826	0.0298511	-0.0818052	-2.43902		+	14.1026	13.8042	14.4562	13.9612	13.7491	14.1018	14.0868	13.9655	14.0638	13.8175	14.0302	14.279	14.1302	14.0154	14.0078	13.9278	14.0446	13.8857
P36543	ATP6V1E1	V-type proton ATPase subunit E 1	Undefined	0.578557	0.237654	0.655458	-0.0173292	-0.560725			0.0856449	1.0673	0.0910134	-0.038003	-1.75214			7.68705e-14	13.1142	0	0.362204	8.73625		+	0.922466	0.0350496	0.951012	0.00385648	0.0975453			17.7644	17.8983	17.5789	17.3037	17.2268	17.6704	17.7345	17.3596	17.5315	17.1353	17.4399	17.5179	17.706	17.5569	17.5616	17.7294	17.4024	17.3697
Q16864	ATP6V1F	V-type proton ATPase subunit F	Undefined	0.672301	0.172436	0.735478	0.0301489	0.426575			0.492773	0.307353	0.510824	0.0287018	0.690784			0.441339	0.355227	0.682367	0.0464781	0.773139			0.0406722	1.3907	0.0695324	-0.126356	-2.07062			14.89	14.5085	15.1643	14.7725	14.9363	14.9997	14.8197	14.869	14.8914	14.7385	14.5196	15.1287	14.913	14.6454	14.8251	14.9244	14.7508	14.5945
O95670	ATP6V1G2	V-type proton ATPase subunit G 2	Undefined	0.792621	0.100935	0.837556	-0.00793303	-0.264926			0.647908	0.188486	0.66623	-0.0123347	-0.459335			0.305795	0.514569	0.573294	-0.0425373	-1.02958			1.77183e-08	7.75158	0	-0.257355	-6.0675		+	15.2707	15.231	14.8033	14.6149	14.6686	14.9263	15.1754	14.56	14.8302	14.578	14.9248	15.1952	15.112	15.0774	15.2162	15.0748	14.7727	14.6312
Q9UI12	ATP6V1H	V-type proton ATPase subunit H	Undefined	3.53495e-05	4.45162	2.72727e-05	-0.135082	-4.73762		+	7.61302e-06	5.11844	4.89596e-06	-0.10775	-4.97134		+	5.75001e-06	5.24033	0.000460857	0.190938	4.80316		+	0.105818	0.975441	0.163072	-0.054282	-1.63032			16.3685	16.0998	16.0295	15.8861	15.7483	15.9461	16.011	15.8869	15.825	15.8567	15.5704	15.8593	15.9037	15.9272	16.0455	15.8502	15.7679	15.7019
Q9Y2Q0-3	ATP8A1	Phospholipid-transporting ATPase IA	Oli	0.000901179	3.04519	0.00126434	0.138584	3.62829		+	2.53085e-09	8.59673	0	0.271454	7.18262		+	0.260686	0.583882	0.530834	0.0428412	1.13145			0.648278	0.188239	0.737809	-0.0156742	-0.457378			15.2505	15.1932	14.8021	14.8738	15.0786	15.0219	14.834	14.7785	14.7148	14.8689	14.9284	14.848	15.0923	14.899	14.7185	14.947	14.7942	14.8579
Q9NTI2	ATP8A2	Phospholipid-transporting ATPase IB	Neuron	0.00819663	2.08636	0.0107125	0.235883	2.80316		+	6.7084e-07	6.17338	0	0.422605	5.67018		+	0.676625	0.169652	0.837138	-0.0282035	-0.418351			0.345536	0.461507	0.4468	-0.0659535	-0.947244			12.9009	13.5904	12.6331	12.7323	13.0161	13.2253	13.1672	12.8659	12.928	12.5887	12.89	13.0977	12.9927	13.0005	12.5156	12.8423	12.6737	12.694
Q5TC12	ATPAF1	ATP synthase mitochondrial F1 complex assembly factor 1	Undefined	0.0458563	1.3386	0.0624359	-0.117425	-2.07039			0.0159433	1.79742	0.0148376	-0.0881701	-2.49163		+	0.278378	0.555365	0.547235	0.0627667	1.09015			1.64593e-06	5.78359	9.52381e-06	-0.266888	-5.05898		+	13.9138	13.6674	14.0083	13.5925	13.3735	13.5317	13.8151	13.4855	13.9182	13.6658	13.8354	14.2429	13.6401	13.5378	13.5484	14.0566	13.8979	13.7831
Q9UBB4	ATXN10	Ataxin-10	Undefined	0.346375	0.460453	0.418006	-0.0776834	-0.954503			0.00019333	3.7137	0.000139623	-0.175573	-4.01246		+	0.0373748	1.42742	0.199518	-0.1777	-2.11095			0.113527	0.944902	0.173668	0.10495	1.5949			13.5586	12.8743	13.4405	13.3212	13.0118	12.9399	13.0249	12.9261	12.9642	13.1478	13.3832	13.2665	12.9862	13.083	12.995	12.8271	13.3185	13.0388
Q8WWM7	ATXN2L	Ataxin-2-like protein	Undefined	0.0299413	1.52373	0.0406485	-0.169624	-2.26888		+	0.00122228	2.91283	0.000921615	-0.380628	-3.4746		+	0.0274691	1.56116	0.168478	0.268295	2.23968			0.00472666	2.32545	0.00971186	-0.33439	-2.88613		+	12.7789	13.0476	12.805	12.2186	12.0636	12.5773	12.9248	12.7497	12.8725	12.7147	12.9049	13.3252	12.4193	12.2676	12.5028	NaN	12.675	12.0596
Q13825	AUH	Methylglutaconyl-CoA hydratase, mitochondrial	In	0.993672	0.0027568	0.996323	-0.000373443	-0.00798748			0.405453	0.392059	0.423888	0.0313423	0.838742			1.05298e-05	4.97758	0.000681564	0.268548	4.65155		+	0.573333	0.241593	0.676319	0.0324065	0.564795			14.5203	14.7459	15.1296	14.7216	14.5683	14.5389	14.7691	14.5924	14.7559	14.4993	14.645	14.8139	14.6882	14.5366	14.5247	14.332	14.5673	14.6102
Q8NBF6	AVL9	Late secretory pathway protein AVL9 homolog	Undefined	0.0921625	1.03545	0.12226	-0.0725322	-1.73154			6.37086e-06	5.1958	4.96278e-06	-0.145649	-5.02226		+	3.42464e-06	5.46538	0.00034891	0.261729	4.93098		+	0.290544	0.536788	0.386286	-0.0693712	-1.0619			14.253	14.4917	14.3662	13.9905	13.9051	14.2717	14.5248	14.2866	14.273	14.0536	14.114	14.6596	14.4104	14.179	14.4712	14.2243	14.0376	14.0456
P25311	AZGP1	Zinc-alpha-2-glycoprotein	Undefined	0.25828	0.587909	0.324214	0.338631	1.15032			0.117825	0.928762	0.125804	0.27811	1.59084			0.00772161	2.11229	0.081477	-0.720493	-2.72255			0.911422	0.0402805	0.941687	-0.0231612	-0.111497			12.9928	12.9275	13.1668	15.7716	16.2509	14.4135	14.0671	15.6081	13.7301	14.1369	13.5192	14.1158	13.538	14.5498	16.3528	15.2449	15.4317	13.2453
O43505	B4GAT1	Beta-1,4-glucuronyltransferase 1	Ex	0.00110462	2.95679	0.0015027	0.217553	3.55551		+	1.66268e-06	5.77919	0	0.30325	5.40204		+	0.751465	0.124091	0.875869	0.0202225	0.317618			0.000731885	3.13556	0.00165351	0.179019	3.4724		+	13.3164	13.1393	13.4128	13.4439	13.0705	13.3391	13.3345	13.0543	13.1934	12.6725	12.9362	13.1896	13.4254	12.8983	12.4819	12.7229	13.0698	12.8571
O95817	BAG3	BAG family molecular chaperone regulator 3	Undefined	5.50664e-06	5.25911	0	0.394242	5.35303		+	5.97411e-14	13.2237	0	0.471255	10.1608		+	0.000115872	3.93602	0.00492887	0.418042	4.02172		+	0.000107182	3.96988	0.000292683	0.388735	4.01664		+	14.4813	14.0667	13.8524	14.2058	13.6836	14.4795	13.8885	13.7726	13.9697	14.4273	14.8339	13.9812	13.3642	13.9924	13.7959	13.8642	13.7375	13.7228
P46379	BAG6	Large proline-rich protein BAG6	Undefined	0.000216948	3.66364	0.000457143	-0.162715	-4.12529		+	0.00254912	2.59361	0.00201643	-0.0816232	-3.17082		+	0.00892196	2.04954	0.0886024	0.111933	2.66945			0.00235913	2.62725	0.00500743	-0.116679	-3.11124		+	14.1986	14.0233	13.8577	13.8509	13.7828	13.9627	13.8627	14.0113	13.8666	13.8365	14.0111	14.1477	13.9707	13.7455	13.7809	13.6832	13.7881	13.7446
Q9UQB8	BAIAP2	Brain-specific angiogenesis inhibitor 1-associated protein 2	Undefined	1.648e-05	4.78304	1.02041e-05	-0.161595	-4.9911		+	1.41903e-10	9.84801	0	-0.178966	-7.97018		+	1.18664e-07	6.92568	9.00901e-06	0.241806	5.72361		+	2.02042e-08	7.69456	0	-0.248061	-6.03949		+	14.3796	14.4775	14.3715	14.2287	14.2011	14.2036	14.3584	13.9955	14.177	14.1042	14.4294	14.2493	14.3586	13.9925	14.5056	14.1358	13.9593	13.9959
O75531	BANF1	Barrier-to-autointegration factor	Undefined	0.0736798	1.13265	0.0987556	-0.196372	-1.84388			0.15136	0.819989	0.161445	-0.078308	-1.45616			0.00196029	2.70768	0.0348747	-0.344052	-3.18374		+	0.12268	0.911227	0.186138	0.130831	1.55526			13.4724	13.0024	13.2705	12.4909	13.2847	13.4256	13.0811	13.4973	13.3424	13.4543	13.799	13.2317	13.2103	13.1844	12.4683	13.4043	13.46	13.5081
P80723	BASP1	Brain acid soluble protein 1	Undefined	0.00326818	2.48569	0.00421053	-0.146785	-3.15763		+	2.85641e-14	13.5442	0	-0.254971	-10.3765		+	0.133011	0.876112	0.3824	0.194318	1.51519			0.590838	0.228532	0.691233	-0.0596965	-0.539159			19.1948	19.9281	18.8198	17.9722	18.8002	19.5113	19.2614	18.5368	18.8691	18.5478	18.1807	17.6207	18.434	18.7782	18.5511	19.2429	17.8877	18.8671
Q07812	BAX	Apoptosis regulator BAX	Undefined	1.8574e-07	6.7311	0	0.258196	6.47142		+	7.92107e-10	9.10122	0	0.265732	7.49939		+	0.0101916	1.99176	0.0960327	0.183484	2.62108			0.300438	0.522246	0.396189	0.066404	1.04026			13.016	13.1821	13.005	12.5881	12.6291	12.8655	12.7332	12.6472	12.9034	12.9638	12.9652	12.5565	12.5757	12.7422	12.2533	12.5373	12.7407	12.6814
P50895	BCAM	Basal cell adhesion molecule	Undefined	0.419496	0.377272	0.495191	-0.049698	-0.816927			0.395086	0.403309	0.413115	-0.0357037	-0.857533			0.433868	0.362643	0.676592	0.0581352	0.785889			0.536614	0.270338	0.640314	0.0407103	0.619835			13.5061	13.2833	13.4013	12.7916	12.8603	13.1644	13.2725	12.9819	13.2643	13.2468	13.5198	13.4648	13.1162	13.1529	12.9889	13.3384	13.2443	13.2356
Q96GW7	BCAN	Brevican core protein	OPC	9.55212e-06	5.0199	1.08108e-05	-0.193439	-5.1714		+	8.45859e-12	11.0727	0	-0.227969	-8.75058		+	0.00193073	2.71428	0.0345744	0.180176	3.18861		+	0.52784	0.277498	0.632023	-0.0324383	-0.633266			18.0931	17.7215	17.9891	17.5294	17.0686	17.726	17.6263	17.53	17.6564	17.4253	17.398	17.5706	17.894	17.2635	17.5593	17.0077	17.6622	17.038
Q9UHQ4-2	BCAP29	B-cell receptor-associated protein 29	Undefined	0.751903	0.123838	0.802502	0.121353	0.325964			0.56731	0.246179	0.586168	0.333238	0.584081			0.086658	1.06219	0.307771	-0.620285	-1.73883			0.363276	0.439764	0.464532	-0.291654	-0.914295			NaN	9.6114	NaN	12.3997	NaN	11.3155	10.4516	12.5424	NaN	11.7199	9.95463	NaN	8.05524	11.1235	11.2281	12.627	NaN	7.73661
P51572-2	BCAP31	B-cell receptor-associated protein 31	Undefined	0.170436	0.768439	0.220413	-0.0685272	-1.39959			0.203554	0.691321	0.215513	-0.0440425	-1.2877			1.81821e-08	7.74036	1.11421e-05	0.519161	6.14461		+	0.021265	1.67233	0.0385538	0.153865	2.33581		+	14.3482	14.5493	13.8191	14.028	14.1788	14.3153	14.2335	14.1696	14.0777	14.034	14.1463	13.7383	13.9819	14.0437	14.6663	14.4394	14.0643	14.1786
Q9H6U6	BCAS3	BCAS3 microtubule associated cell migration factor	Undefined	0.258816	0.587009	0.324617	0.0465314	1.14785			0.912611	0.0397144	0.921692	0.00345685	0.110281			0.00286365	2.54308	0.0444489	0.194732	3.06068		+	0.0259769	1.58541	0.0459487	-0.110366	-2.25628		+	13.4961	13.4227	13.1577	13.3814	13.1333	13.1608	13.3408	13.3324	13.2427	13.4002	13.1337	13.4968	13.164	13.3	13.3349	13.3176	13.0923	13.0287
P12694	BCKDHA	2-oxoisovalerate dehydrogenase subunit alpha, mitochondrial	Undefined	0.00787365	2.10382	0.0103198	0.123011	2.81908		+	6.91582e-07	6.16016	0	0.196326	5.64673		+	0.795104	0.0995759	0.899167	0.0125177	0.260411			0.0438226	1.3583	0.07478	-0.0950771	-2.03861			13.1634	13.3429	12.6052	12.1852	12.8552	12.7328	12.7086	12.4259	12.8304	12.9219	12.7824	12.8284	12.9584	13.0949	12.7769	12.7847	12.6784	12.7753
O14874	BCKDK	[3-methyl-2-oxobutanoate dehydrogenase	Undefined	0.895664	0.047855	0.920881	0.0158993	0.132188			0.796598	0.0987608	0.816957	-0.0450131	-0.259395			0.864834	0.0630674	0.934773	0.0285982	0.170706			0.00218756	2.66004	0.00464977	-0.530615	-3.14498		+	11.5374	10.7759	10.8968	NaN	11.1495	11.7917	11.9041	10.5313	11.4322	11.1708	11.5858	11.6184	11.9349	11.3257	12.4701	11.003	11.3676	11.0874
Q9BXK5	BCL2L13	Bcl-2-like protein 13	Undefined	0.382683	0.417161	0.457699	-0.0389588	-0.884086			0.937016	0.0282532	0.945244	-0.00270874	-0.0794046			0.451784	0.34507	0.690139	0.0530636	0.755525			2.67428e-06	5.57279	8.92857e-06	-0.328062	-4.94465		+	14.4137	14.3008	14.0007	14.229	13.912	13.7574	14.1457	14.2582	13.7619	13.6102	13.5019	14.3049	13.991	14.3105	13.9483	14.2192	14.1893	14.0763
Q92843-2	BCL2L2	Bcl-2-like protein 2	Undefined	0.481502	0.317402	0.558848	-0.0399746	-0.71148			0.000945971	3.02412	0.000710462	-0.153118	-3.50603		+	0.00191245	2.71841	0.0343705	-0.220097	-3.19165		+	0.787677	0.103652	0.85534	0.0184161	0.269968			12.9701	13.1617	13.2333	13.9158	12.8768	12.8267	12.8318	12.8665	12.8252	12.834	12.9245	13.2298	13.0449	12.7813	12.734	13.0317	13.2536	12.8638
Q9NYF8	BCLAF1	Bcl-2-associated transcription factor 1	Undefined	0.4978	0.302945	0.575021	-0.052099	-0.685089			0.389091	0.409949	0.407739	-0.0640625	-0.868537			0.317804	0.49784	0.583889	0.101331	1.00426			0.00126679	2.89729	0.00278507	0.277557	3.30728		+	13.3637	13.7317	13.8879	13.2187	13.6595	13.3882	13.3188	13.803	13.7227	13.877	13.7229	13.4748	13.4951	13.2797	13.1466	13.154	13.6867	13.4581
P11274	BCR	Breakpoint cluster region protein	Undefined	0.0896142	1.04762	0.119356	0.0643667	1.74583			0.90103	0.0452606	0.912518	0.00292073	0.124969			6.37223e-07	6.19571	9.88593e-05	0.278969	5.33452		+	0.0579239	1.23714	0.0964707	-0.0834107	-1.91575			13.9325	13.888	13.4305	13.5274	13.5041	13.4534	13.6191	13.7285	13.3055	13.6081	13.6445	13.8971	13.1457	13.2767	13.5744	13.6455	13.5334	13.3779
Q02338	BDH1	D-beta-hydroxybutyrate dehydrogenase, mitochondrial	Undefined	0.1144	0.941575	0.151406	-0.0714771	-1.61912			0.0285669	1.54414	0.0277848	-0.0721273	-2.25207		+	0.0062367	2.20505	0.071984	-0.155972	-2.79674			0.676227	0.169908	0.762101	0.0223753	0.418704			14.0359	14.8871	14.5196	14.4453	14.4471	14.0186	13.9282	13.833	14.2425	14.3145	14.024	14.4607	14.1543	14.1341	13.9725	14.1219	14.0973	13.8025
A1A5D9	BICDL2	BICD family-like cargo adapter 2	Undefined	1	0	0.994126	-13.8087	0			1	0	1	12.772	0			0.472967	0.325169	0.70545	3.34255	0.740962			0.807972	0.0926036	0.870774	0.522295	0.245741			NaN	NaN	NaN	8.0945	7.63073	23.3691	16.2068	NaN	NaN	NaN	NaN	NaN	16.7363	NaN	NaN	NaN	NaN	NaN
P55957	BID	BH3-interacting domain death agonist	Undefined	0.00384307	2.41532	0.00503937	0.353699	3.1098		+	0.00300998	2.52144	0.00240882	0.46235	3.12555		+	0.57327	0.24164	0.769989	-0.104194	-0.565332			0.745315	0.12766	0.820181	-0.0562925	-0.325679			10.7731	10.7044	14.3104	11.0907	10.4255	12.7138	12.952	12.8439	12.1983	12.0391	12.5398	12.3775	12.6973	12.7924	11.6476	12.3754	12.5362	12.4554
O00499	BIN1	Myc box-dependent-interacting protein 1	Undefined	0.000400843	3.39703	0.000646593	-0.159387	-3.91335		+	3.78735e-11	10.4217	0	-0.219712	-8.33417		+	0.000958633	3.01835	0.022	0.18021	3.40773		+	0.0923301	1.03466	0.144995	-0.068993	-1.69763			16.3212	16.3786	15.8854	15.6127	15.796	16.3404	16.1766	15.7991	16.1698	15.8891	15.7723	15.889	16.2753	16.0875	16.0074	16.1654	15.8864	16.0241
P78537	BLOC1S1	Biogenesis of lysosome-related organelles complex 1 subunit 1	Undefined	0.793553	0.100424	0.837535	-0.0282702	-0.263828			0.698275	0.155974	0.718928	-0.041126	-0.390255			0.966065	0.0149936	0.985339	-0.00463622	-0.0426573			0.0094019	2.02678	0.0182297	-0.258836	-2.64535		+	14.4629	14.3645	14.0008	NaN	NaN	13.6263	13.544	14.196	13.5533	13.1086	13.1743	13.4793	13.5867	13.2779	13.5985	12.8307	13.7034	NaN
P53004	BLVRA	Biliverdin reductase A	Undefined	0.0439724	1.35682	0.0600086	-0.0857886	-2.08977			0.439231	0.357307	0.457352	-0.0242168	-0.77948			0.00368925	2.43306	0.052143	0.153533	2.97654			1.04013e-05	4.98291	2.99065e-05	0.219638	4.61615		+	14.5898	14.3201	14.8543	14.4658	14.248	14.5136	14.4075	14.1872	14.4795	14.2435	14.8091	14.1377	14.6599	14.4471	14.1117	14.6326	14.4646	14.7346
P30043	BLVRB	Flavin reductase	Undefined	0.158472	0.800047	0.206468	-0.0617584	-1.441			0.113861	0.943625	0.121491	0.0340011	1.60814			4.82308e-15	14.3167	0	0.566767	9.29685		+	2.0468e-17	16.6889	0	0.501911	10.0726		+	15.8	15.2708	15.2615	15.1871	15.456	15.4127	15.1855	14.9428	15.1238	15.491	15.6809	15.0836	15.7986	15.7616	14.9473	15.2535	15.2856	15.7649
Q13873	BMPR2	Bone morphogenetic protein receptor type-2	Undefined	0.00277508	2.55672	0.00369014	0.167684	3.21885		+	0.146848	0.833133	0.156638	0.084852	1.47364			0.0413265	1.38377	0.210118	-0.115196	-2.06803			0.939287	0.0272016	0.963927	0.00419701	0.076337			12.8177	13.4354	13.1464	13.577	13.2469	13.6585	13.3008	12.911	13.2504	12.9972	13.4149	13.3958	13.3984	13.2432	13.0899	13.3448	13.1611	13.445
O60238	BNIP3L	BCL2/adenovirus E1B 19 kDa protein-interacting protein 3-like	Undefined	0.0198715	1.70177	0.0270578	-0.19963	-2.44755		+	0.267534	0.572622	0.282544	0.122722	1.12527			0.00129829	2.88663	0.026795	0.369033	3.3219		+	0.00746336	2.12707	0.0147962	-0.398695	-2.73221		+	13.0284	13.1153	14.4596	11.5861	11.0601	12.3488	12.4351	11.9328	12.0665	11.9192	NaN	13.0685	13.8125	13.6299	14.3016	12.3894	12.8734	12.3384
Q9NP55	BPIFA1	BPI fold-containing family A member 1	Undefined	1	0	0.978733	NaN	0			1	0	1	2.16789	0			0.963479	0.0161576	0.984051	-0.0613094	-0.0469477			0.045499	1.342	0.0776039	-1.59609	-2.23136			NaN	8.67353	NaN	NaN	NaN	NaN	NaN	NaN	NaN	NaN	NaN	NaN	NaN	NaN	NaN	NaN	NaN	NaN
Q8TDL5	BPIFB1	BPI fold-containing family B member 1	Undefined	0.994476	0.00240584	0.996311	-0.00582259	-0.00721703			0.476275	0.322142	0.495484	0.360886	0.731948			0.908348	0.0417478	0.95581	-0.0571443	-0.115873			0.801393	0.0961547	0.865622	-0.102328	-0.252811			NaN	NaN	NaN	14.8534	10.4053	NaN	NaN	14.227	13.3951	NaN	NaN	NaN	9.12622	NaN	NaN	11.8373	13.5838	NaN
O95861	BPNT1	3'(2'),5'-bisphosphate nucleotidase 1	Undefined	0.883115	0.0539828	0.910791	0.0206125	0.148099			0.330457	0.480885	0.349262	-0.0521923	-0.982389			0.72567	0.139261	0.860663	-0.0429926	-0.35192			0.614532	0.211455	0.707783	-0.0408482	-0.505014			13.4571	13.6031	13.5931	13.6186	13.76	13.5839	13.5844	13.5078	13.7114	13.5936	14.0547	13.6573	13.2388	13.5195	12.6973	13.9826	13.6526	13.37
P15056	BRAF	Serine/threonine-protein kinase B-raf	Ex	0.00846311	2.07247	0.0110283	-0.174858	-2.79047		+	0.044638	1.3503	0.0452043	-0.112429	-2.0578		+	0.68379	0.165077	0.839869	0.023774	0.408536			0.00909422	2.04123	0.0177077	0.154597	2.65427		+	12.3213	13.2375	12.9213	12.6671	12.6397	12.7472	12.969	12.7966	12.6623	12.9867	12.742	12.9227	12.9822	12.8377	12.5863	12.815	12.657	12.8035
Q8WUW1	BRK1	Protein BRICK1	Undefined	0.194951	0.710075	0.24977	-0.0933915	-1.32137			0.911062	0.0404521	0.92053	-0.00313214	-0.112244			2.97905e-08	7.52592	1.05541e-05	0.413733	6.03498		+	0.00160297	2.79507	0.00356207	0.169864	3.23357		+	15.807	15.5364	16.0062	15.8375	16.0774	15.6382	15.696	16.0649	15.6557	15.5608	15.7977	15.7099	15.8752	15.7606	16.0275	15.9135	15.3976	15.6002
Q5VW32	BROX	BRO1 domain-containing protein BROX	Undefined	0.267668	0.572404	0.334033	-0.0884986	-1.13181			0.768382	0.114423	0.789503	0.0699735	0.297005			0.246493	0.608195	0.516545	0.233979	1.16913			0.994145	0.00255043	0.997065	-0.00170454	-0.0073632			13.0139	12.859	11.006	NaN	12.6582	12.6313	NaN	12.6786	12.1424	13.2949	12.983	12.6109	12.5338	12.4259	12.1049	NaN	12.5866	13.3543
Q8TDC3	BRSK1	Serine/threonine-protein kinase BRSK1	Undefined	0.0185051	1.73271	0.024766	-0.0949494	-2.4706		+	0.000380216	3.41997	0.000289242	-0.136652	-3.8006		+	4.5012e-06	5.34667	0.000398792	0.283708	4.86378		+	0.0903548	1.04405	0.141886	-0.0950015	-1.70815			14.3418	14.3212	13.9074	14.2225	14.0967	14.228	14.3137	14.1121	14.4515	13.6568	14.0751	14.3906	14.3875	14.0542	14.1038	14.1992	14.2729	13.9744
Q8IWQ3	BRSK2	Serine/threonine-protein kinase BRSK2	Undefined	0.0355622	1.44901	0.0486475	-0.290278	-2.18898		+	0.00912206	2.03991	0.0081264	-0.343893	-2.71081		+	0.0245067	1.61072	0.158203	-0.185285	-2.28551			0.00189032	2.72347	0.00408754	-0.22045	-3.18178		+	12.8531	12.5453	11.7219	12.1458	12.3429	12.5525	12.8187	12.5285	12.7045	12.5563	12.3924	12.7532	12.4328	12.2766	12.0663	12.386	12.1189	12.1731
Q96G97	BSCL2	Seipin	Undefined	0.480707	0.31812	0.558036	-0.0974382	-0.713247			0.00560847	2.25116	0.00475086	-0.269429	-2.89238		+	0.00594399	2.22592	0.0700483	-0.299818	-2.8142			0.455592	0.341424	0.558577	-0.0691424	-0.748726			14.1815	14.8795	16.7254	17.1866	16.7394	16.6105	16.5701	16.7195	16.4044	17.2859	16.3008	17.0505	16.793	17.1608	17.4464	17.2341	17.163	16.4587
P35613	BSG	Basigin	Undefined	1.35864e-07	6.8669	0	-0.385328	-6.57541		+	4.39013e-14	13.3575	0	-0.351694	-10.2507		+	0.00163563	2.78631	0.0311299	0.271247	3.24141		+	0.72992	0.136725	0.807524	-0.0263117	-0.346088			16.9526	17.3682	16.4467	16.635	16.427	17.2849	17.0118	16.5642	16.9266	16.8119	16.8239	16.8573	17.2033	17.012	16.7517	16.9359	16.8977	17.0814
Q9UPA5	BSN	Protein bassoon	Undefined	0.000232618	3.63336	0.000462347	-0.164595	-4.10136		+	5.47606e-07	6.26153	0	-0.192292	-5.71149		+	3.80497e-06	5.41965	0.000359133	0.190731	4.90514		+	9.07469e-19	18.0422	0	-0.435845	-10.6539		+	15.7373	15.9212	15.3666	15.4036	15.1027	15.4794	15.7313	15.4042	15.5162	15.0261	15.4673	15.8768	15.4986	15.58	15.7243	15.4509	15.2148	15.1488
Q5XKL5	BTBD8	BTB/POZ domain-containing protein 8	Undefined	0.0414231	1.38276	0.0567028	-0.129446	-2.11719			0.000567919	3.24571	0.000430034	-0.166739	-3.67233		+	0.205638	0.686896	0.472504	0.117027	1.27429			8.1559e-08	7.08853	0	-0.47147	-5.7379		+	13.2292	12.9558	12.2565	12.361	12.3338	12.5408	13.1234	12.6487	12.5557	12.2161	12.3197	12.6555	12.2209	12.18	12.9849	12.0124	12.3565	12.209
Q13410	BTN1A1	Butyrophilin subfamily 1 member A1	Undefined	0.418355	0.378455	0.494504	0.699644	1.01122			1	0	0.999538	0.773313	0			0.67997	0.16751	0.838177	-0.397034	-0.41804			0.276227	0.558733	0.368978	0.752057	1.11221			NaN	NaN	NaN	NaN	NaN	NaN	NaN	12.1537	NaN	NaN	NaN	NaN	NaN	NaN	NaN	NaN	NaN	NaN
Q9H0W9	C11orf54	Ester hydrolase C11orf54	Undefined	0.0483971	1.31518	0.0656603	-0.481892	-2.05229			0.629903	0.200726	0.649234	0.0514118	0.484787			0.00345539	2.4615	0.0500464	-0.420783	-2.99924			0.124884	0.903494	0.188907	0.187018	1.54617			9.85367	12.0116	NaN	10.757	11.5212	11.7452	11.3165	11.4112	11.8211	11.9026	11.7645	11.9869	10.4172	10.1796	12.0901	11.8548	11.8743	11.8995
Q9H3H3	C11orf68	UPF0696 protein C11orf68	Undefined	0.000164662	3.78341	0.000161765	-0.178792	-4.21955		+	2.40246e-05	4.61934	4.45434e-06	-0.148858	-4.63885		+	0.00415605	2.38132	0.0562665	0.147846	2.9364			0.165076	0.782317	0.240336	0.0831952	1.39725			14.9644	15.2065	15.542	15.2554	15.2946	15.1044	15.2069	15.2731	15.1074	15.1575	14.8075	15.1089	15.2862	14.7177	15.0984	15.1248	15.4292	14.8158
Q9H425	C1orf198	Uncharacterized protein C1orf198	Undefined	0.677835	0.168876	0.740618	0.0345848	0.419023			0.0300714	1.52185	0.0295897	0.103723	2.23026		+	0.717352	0.144267	0.85687	0.0318233	0.363091			7.27895e-05	4.13793	0.000228228	0.326198	4.12165		+	13.8666	13.0775	12.7025	13.3997	12.589	13.3158	13.0505	13.0414	13.1771	13.4657	13.9736	12.8825	13.2534	13.6672	12.875	13.1891	13.0567	13.5308
Q07021	C1QBP	Complement component 1 Q subcomponent-binding protein, mitochondrial	Undefined	0.741613	0.129823	0.796589	0.0239207	0.332342			0.719554	0.142937	0.741728	0.0147616	0.361011			5.22175e-08	7.28218	1.00251e-05	-0.537043	-5.90937		+	0.0016146	2.79194	0.00358594	-0.211395	-3.23132		+	12.983	13.3048	13.1373	12.854	12.6744	12.7045	12.9054	12.8254	13.2987	12.5415	12.7527	12.6632	12.9893	12.9422	12.9649	12.7482	12.648	12.6549
O14523	C2CD2L	Phospholipid transfer protein C2CD2L	Undefined	0.00267572	2.57256	0.00355556	-0.190058	-3.23243		+	0.00202629	2.6933	0.00157567	-0.137306	-3.25004		+	0.0808398	1.09237	0.297018	0.0961166	1.76443			0.295184	0.529907	0.390805	-0.0513443	-1.05169			14.0229	13.7891	13.2915	13.2149	13.1477	13.5301	13.6217	13.4145	13.4006	13.0812	13.4905	13.7381	13.5945	13.5453	13.5762	13.3577	13.3407	13.3223
Q8TF44	C2CD4C	C2 calcium-dependent domain-containing protein 4C	Undefined	0.319272	0.495839	0.388763	-0.060438	-1.01033			1.86724e-07	6.7288	0	-0.221522	-6.00844		+	0.000117619	3.92952	0.00496552	0.311424	4.01579		+	1.25874e-10	9.90007	0	-0.450791	-7.08641		+	13.2968	13.3543	13.2844	12.864	12.8764	12.6803	13.2887	12.8276	12.8901	12.7907	12.8251	13.5088	13.0304	12.8101	13.5997	12.7747	12.8596	12.5312
Q86YS7-2	C2CD5	C2 domain-containing protein 5	Undefined	0.000514615	3.28852	0.000787786	-0.229771	-3.82615		+	2.84699e-05	4.54561	4.38596e-06	-0.208018	-4.58908		+	6.43151e-11	10.1917	0	0.428041	7.35438		+	0.723375	0.140637	0.803638	0.0193408	0.354835			14.2657	13.8606	12.9538	13.4375	13.1058	13.2893	13.6356	13.3114	13.338	13.1736	13.4532	13.7811	13.4571	13.4592	13.5744	13.0279	13.1049	13.2421
Q6P1X6	C8orf82	UPF0598 protein C8orf82	Undefined	0.723788	0.140388	0.781415	0.148251	0.463316			0.455751	0.341273	0.474457	-0.299587	-0.854259			0.025591	1.59191	0.162343	-0.645283	-2.33812			0.0617118	1.20963	0.1022	-0.439205	-1.91965			NaN	10.845	NaN	NaN	11.9316	NaN	NaN	11.0446	12.2501	11.8118	NaN	NaN	12.6682	NaN	NaN	12.3415	NaN	NaN
P00915	CA1	Carbonic anhydrase 1	Undefined	0.142983	0.844717	0.187841	-0.155048	-1.49946			0.00590158	2.22903	0.00505437	-0.205946	-2.87368		+	0.316603	0.499485	0.583179	0.151255	1.00677			0.00989153	2.00474	0.0190585	0.32363	2.62439		+	12.8235	13.2693	14.3042	14.6556	14.0199	14.7203	14.5838	14.0544	14.6426	14.6444	14.7085	13.7778	14.0247	15.0343	13.4054	14.4712	14.752	13.8591
P00918	CA2	Carbonic anhydrase 2	Undefined	0.185113	0.732564	0.237955	-0.0839502	-1.3518			0.132562	0.877579	0.141492	-0.0518853	-1.52804			0.124018	0.906514	0.368898	0.137631	1.55173			9.88208e-08	7.00515	0	0.429162	5.69581		+	15.9826	16.156	15.4987	15.1624	15.3635	16.1165	15.6119	15.0991	15.423	16.17	16.1314	14.5903	15.9341	15.8692	15.3835	16.0639	15.3772	16.1777
P22748	CA4	Carbonic anhydrase 4	Undefined	7.42679e-09	8.1292	0	-0.55798	-7.55608		+	1.17665e-05	4.92935	4.7619e-06	-0.338889	-4.85615		+	0.52522	0.279659	0.739776	0.0792752	0.637649			0.0462382	1.335	0.0787981	-0.249868	-2.01538			13.3913	13.9015	13.3917	13.2763	13.8962	13.6061	14.0028	13.3246	13.7728	13.8073	14.2727	13.0444	13.9855	14.0318	13.709	13.9874	13.5148	13.9115
Q00975	CACNA1B	Voltage-dependent N-type calcium channel subunit alpha-1B	Neuron	0.578546	0.237662	0.655706	-0.0619518	-0.560742			0.440178	0.356371	0.458324	0.154827	0.778225			0.00253668	2.59573	0.0413012	0.318634	3.10128		+	0.475029	0.323279	0.579092	-0.148908	-0.716735			12.9388	12.8888	12.928	12.9527	12.7512	12.9107	12.8135	12.7822	12.4161	12.823	12.8884	13.1536	12.3754	12.6728	12.0817	12.4692	12.4472	12.7098
Q15878	CACNA1E	Voltage-dependent R-type calcium channel subunit alpha-1E	Neuron	0.0811097	1.09093	0.1086	-0.334913	-1.79771			0.0714892	1.14576	0.0752514	-0.251406	-1.84228			0.00280306	2.55237	0.0438038	-0.285905	-3.06857		+	0.150555	0.822305	0.221463	-0.166366	-1.44767			13.8265	14.1806	10.2673	12.614	11.9564	12.8568	12.1527	12.28	11.7709	12.5101	12.4978	12.4729	12.1971	11.595	12.6132	12.1518	11.6324	11.9342
Q9P0X4	CACNA1I	Voltage-dependent T-type calcium channel subunit alpha-1I	Undefined	0.000280505	3.55206	0.000511785	0.309308	4.03696		+	6.98288e-06	5.15597	4.92005e-06	0.319529	4.99606		+	0.495829	0.304668	0.719243	-0.0729336	-0.683673			0.000107826	3.96728	0.000292264	0.360418	4.01372		+	13.7165	14.212	14.9719	14.3587	13.9431	14.2626	14.3503	14.2374	13.9501	14.8729	14.2846	14.4296	14.4548	14.1034	14.0067	14.055	14.123	14.0863
P54289-2	CACNA2D1	Voltage-dependent calcium channel subunit alpha-2/delta-1	Undefined	2.84549e-07	6.54584	0	-0.281306	-6.32991		+	2.76766e-15	14.5579	0	-0.291893	-11.0698		+	3.88471e-13	12.4106	0	-0.342871	-8.40685		+	8.80011e-15	14.0555	0	-0.361321	-8.93599		+	14.8655	15.0759	14.6274	14.6802	14.5568	14.9117	14.8353	14.346	14.8352	14.5898	14.8265	14.7953	14.6805	14.8194	14.9592	14.747	14.5908	14.8005
Q9NY47	CACNA2D2	Voltage-dependent calcium channel subunit alpha-2/delta-2	Undefined	0.392177	0.406518	0.467903	-0.155982	-0.870747			0.0938456	1.02759	0.0997523	-0.192648	-1.71165			0.0444966	1.35167	0.218516	-0.190139	-2.03924			0.0747481	1.1264	0.121108	0.165624	1.80025			13.0962	13.2381	12.8152	12.4869	12.0945	13.4771	13.1807	12.2274	13.5727	12.7389	12.2926	12.2617	14.0654	14.1076	13.1404	13.8423	13.7596	14.143
P54284	CACNB3	Voltage-dependent L-type calcium channel subunit beta-3	Undefined	0.0712893	1.14698	0.0955765	-0.585749	-1.86012			0.00259604	2.58569	0.0020506	-0.184044	-3.17427		+	0.830931	0.0804353	0.919109	0.0183511	0.21409			9.50398e-05	4.02209	0.000281938	-0.316106	-4.04767		+	13.293	12.8769	11.43	12.6705	12.515	12.7011	12.6614	12.4595	12.9575	12.6857	13.2314	13.2899	12.8628	13.1882	12.3472	12.5463	12.7145	12.5639
O00305	CACNB4	Voltage-dependent L-type calcium channel subunit beta-4	Neuron	0.060882	1.21551	0.0821287	-0.233281	-1.94066			1.26145e-05	4.89913	4.73373e-06	-0.438012	-4.83595		+	0.0256104	1.59158	0.16225	0.282711	2.26813			0.600721	0.221327	0.699194	-0.0578917	-0.524842			14.5454	14.2632	13.8441	13.1021	12.5077	13.1542	13.4917	12.5577	13.0455	12.9499	13.6262	13.4668	13.2484	13.3205	13.4541	13.2938	13.3395	13.5478
O60359	CACNG3	Voltage-dependent calcium channel gamma-3 subunit	Neuron	0.000204892	3.68848	0.000438849	-0.294977	-4.15888		+	0.000180446	3.74365	0.000121557	-0.256445	-4.0596		+	0.000127779	3.89354	0.00530435	-0.258135	-3.99468		+	1.66031e-05	4.77981	4.26288e-05	-0.291698	-4.49977		+	12.9822	13.8114	13.1265	13.4763	13.0078	13.4514	13.5143	13.1952	12.8859	12.9312	13.2137	13.2075	13.1446	12.5875	13.4219	12.5954	12.7859	12.0601
Q9HB71	CACYBP	Calcyclin-binding protein	Undefined	0.00690374	2.16092	0.00879112	-0.231826	-2.87082		+	8.70773e-08	7.0601	0	-0.267859	-6.21776		+	0.166779	0.777858	0.425135	-0.128299	-1.39319			0.00108411	2.96493	0.00243802	0.250493	3.35418		+	13.8522	13.8166	13.8632	13.4731	13.312	14.0685	13.7315	13.1175	13.8313	13.3984	13.6071	13.0507	13.9077	13.3781	13.3611	13.6397	13.563	13.3317
P27708	CAD	CAD protein	Undefined	0.285415	0.544523	0.352881	-0.0774042	-1.087			0.92623	0.0332814	0.933637	-0.0116144	-0.0933221			0.142396	0.846502	0.394299	-0.19484	-1.48294			0.834802	0.0784163	0.889206	-0.0327896	-0.209245			11.4769	12.6986	NaN	12.8861	13.3607	11.4315	11.6675	12.927	10.6789	NaN	13.0295	NaN	11.6153	11.5611	11.4487	12.9498	12.289	13.4603
Q9BY67-5	CADM1	Cell adhesion molecule 1	Ast	3.46019e-13	12.4609	0	-0.43196	-11.262		+	1.10354e-10	9.95721	0	-0.278724	-8.03929		+	0.101021	0.995586	0.332929	0.110669	1.65583			6.73578e-09	8.17161	0	-0.387406	-6.27203		+	14.0322	14.4368	13.7811	13.6603	13.5984	13.6183	13.9941	13.7384	14.0456	13.5475	13.6951	14.2941	13.7007	13.8812	13.8349	13.444	13.673	13.5296
Q8N3J6	CADM2	Cell adhesion molecule 2	Undefined	1.75038e-11	10.7569	0	-0.263337	-9.72485		+	1.23846e-18	17.9071	0	-0.34988	-13.5043		+	0.0122118	1.91322	0.106712	0.158482	2.55434			0.000312936	3.50454	0.00077597	-0.179577	-3.71909		+	16.2397	16.5726	15.865	15.8174	15.8248	15.9827	16.3113	16.0288	15.9044	15.8128	15.5557	15.9071	15.9559	16.1674	16.159	16.0511	15.9276	15.7169
Q8N126	CADM3	Cell adhesion molecule 3	Undefined	9.32299e-12	11.0304	0	-0.311862	-9.96373		+	2.66939e-12	11.5736	0	-0.287644	-9.07384		+	0.195606	0.708618	0.461144	0.090645	1.30325			1.62396e-09	8.78943	0	-0.420066	-6.56771		+	15.5192	15.9295	14.7318	14.9575	14.942	15.134	15.5502	15.1025	15.5108	14.6816	14.6804	15.7592	15.1225	15.2033	15.5274	15.2415	15.1266	14.9614
Q8NFZ8	CADM4	Cell adhesion molecule 4	Undefined	5.35489e-06	5.27125	0	-0.268413	-5.36224		+	1.28586e-09	8.89081	0	-0.277173	-7.36719		+	0.756389	0.121255	0.878309	0.0223844	0.311113			0.0739158	1.13126	0.119941	-0.113557	-1.80387			16.5457	16.3988	15.7511	15.9841	15.2832	16.0263	16.0568	15.811	16.3628	16.1114	15.6135	15.8861	15.8576	15.2319	16.1002	15.5324	15.5523	15.7741
Q9ULU8	CADPS	Calcium-dependent secretion activator 1	Neuron	2.61077e-07	6.58323	0	-0.166766	-6.35844		+	6.96376e-12	11.1572	0	-0.212177	-8.8049		+	0.118556	0.926077	0.360223	0.0586651	1.57496			4.79781e-08	7.31896	0	-0.180295	-5.85346		+	14.6863	14.851	14.322	14.4418	14.2779	14.5006	14.6727	14.6073	14.4999	14.3247	14.2061	14.4799	14.518	14.5836	14.6544	14.4156	14.4702	14.3474
Q86UW7	CADPS2	Calcium-dependent secretion activator 2	Undefined	0.650969	0.186439	0.718368	-0.0461076	-0.45645			0.0895395	1.04799	0.0953036	-0.164274	-1.73144			0.452673	0.344216	0.690437	0.0735246	0.754069			0.044873	1.34802	0.0765641	0.155386	2.02838			14.4318	14.0919	13.3017	13.4071	13.2671	13.4289	13.4528	13.381	13.6292	13.5507	13.3659	13.5716	13.2432	13.6242	13.5067	13.4019	13.354	13.199
P05937	CALB1	Calbindin	In	0.0619628	1.20787	0.0835304	-0.128078	-1.92829			0.431366	0.365154	0.450685	-0.0336699	-0.793027			1.99012e-07	6.70112	1.71306e-05	-0.47339	-5.60524		+	0.0810656	1.09116	0.129272	-0.117283	-1.76028			13.9619	15.0591	14.6091	14.5374	14.9614	14.6265	14.5519	14.566	14.9684	14.5151	14.8242	14.4709	14.7817	14.6339	14.5523	14.6583	14.4337	14.6505
P22676	CALB2	Calretinin	Undefined	0.000684773	3.16445	0.000977909	-0.170533	-3.7257		+	3.52564e-05	4.45276	1.72043e-05	-0.159821	-4.52614		+	0.0720737	1.14222	0.280587	0.149184	1.81871			1.06964e-10	9.97076	0	0.515944	7.11895		+	14.7148	14.4574	14.1904	14.2567	14.8536	14.2975	13.7446	13.999	14.2539	14.3755	14.8151	13.5808	14.6563	14.5727	13.9718	14.4859	14.3852	14.4789
Q9P1Z2	CALCOCO1	Calcium-binding and coiled-coil domain-containing protein 1	Undefined	0.971894	0.0123812	0.979044	-0.00238861	-0.0354861			0.0549745	1.25984	0.0562828	-0.133913	-1.96326			0.00415417	2.38152	0.0562861	0.181074	2.93655			0.000175505	3.75571	0.000440217	-0.217615	-3.88085		+	12.9493	12.3073	11.9162	11.5389	11.2059	12.0895	12.4299	11.7259	11.8693	12.1071	11.8211	12.5278	12.1049	12.0026	11.8336	12.0379	11.8511	11.7464
P0DP23	CALM1	Calmodulin-1	Undefined	0.529496	0.276138	0.60674	0.0335675	0.635097			0.00228423	2.64126	0.00181543	-0.0581268	-3.20881		+	0.0265495	1.57594	0.165514	0.135581	2.25279			0.0886244	1.05245	0.139455	-0.0705896	-1.71752			18.2755	18.3662	18.2688	17.9786	17.9599	18.2928	18.134	18.0522	17.9274	17.9622	18.1071	17.9544	18.2825	18.1843	18.2661	18.2233	18.0522	17.9388
P27482	CALML3	Calmodulin-like protein 3	Undefined	0.460433	0.336834	0.536455	0.0518483	0.746362			0.355545	0.449105	0.374896	-0.0426302	-0.932192			1.88755e-11	10.7241	0	0.476804	7.60947		+	1.45789e-05	4.83628	3.59712e-05	0.269638	4.53231		+	19.8584	19.8194	19.9062	19.5727	19.6444	19.6552	19.5738	19.5423	19.2572	19.4621	19.4911	19.1627	19.5248	19.2375	20.0374	19.7081	19.5548	19.1233
Q9NZT1	CALML5	Calmodulin-like protein 5	Undefined	0.106438	0.972905	0.140769	0.660497	1.6571			0.169552	0.770698	0.18041	0.360184	1.39298			0.0145689	1.83657	0.118861	-0.730231	-2.48802			0.194609	0.710837	0.277558	0.351614	1.30481			14.5092	15.7696	15.1218	18.0323	18.9927	17.9017	16.6475	18.0412	16.5582	15.4571	15.2971	16.2391	14.5045	17.3404	18.9337	17.9705	18.2922	14.9069
P27797	CALR	Calreticulin	Undefined	0.57967	0.236819	0.656136	-0.0809725	-0.559076			0.000761013	3.11861	0.000555278	-0.164958	-3.5774		+	0.186257	0.729887	0.450172	0.235142	1.33126			0.0483694	1.31543	0.0821674	0.17174	1.99573			14.7708	14.8197	13.6952	13.7363	13.7436	14.0092	14.3414	13.6566	13.9425	14.5654	13.9265	13.5476	14.3386	14.6417	14.6773	14.4716	13.901	14.5044
O43852	CALU	Calumenin	Undefined	0.316086	0.500195	0.385445	-0.0632482	-1.01753			0.193544	0.713219	0.204744	-0.0564979	-1.31721			0.0536305	1.27059	0.241035	0.13879	1.9541			0.231267	0.635886	0.318554	0.0808986	1.20358			13.7358	14.3113	13.9219	13.602	13.9516	13.8452	13.7474	13.3816	14.2142	13.872	13.8845	13.3107	13.9678	14.1841	13.8786	14.0392	13.5626	14.2131
Q8IU85	CAMK1D	Calcium/calmodulin-dependent protein kinase type 1D	Undefined	0.00150331	2.82295	0.00194845	-0.169839	-3.44429		+	3.50062e-07	6.45585	0	-0.155912	-5.83527		+	0.165661	0.78078	0.424285	0.0762607	1.39691			0.0265682	1.57564	0.0468912	-0.0968899	-2.24722		+	14.5769	14.5834	14.3839	14.3273	14.3814	14.2183	14.3101	14.2548	14.2743	14.2466	14.1178	14.3861	14.4162	13.9594	14.2824	14.3005	14.0999	14.0417
Q9UQM7	CAMK2A	Calcium/calmodulin-dependent protein kinase type II subunit alpha	Undefined	0.00263683	2.57892	0.00353025	-0.123849	-3.23788		+	4.54444e-05	4.34252	1.69133e-05	-0.0989585	-4.45099		+	1.54465e-14	13.8112	0	0.482181	9.06142		+	0.00232581	2.63343	0.00494315	-0.126482	-3.1158		+	18.5831	18.8073	18.4241	18.0745	18.3185	18.3842	18.4897	18.1681	18.3407	18.1673	18.2187	18.0907	18.52	18.3289	18.5781	18.5187	18.3097	18.0762
Q13554	CAMK2B	Calcium/calmodulin-dependent protein kinase type II subunit beta	Undefined	8.23753e-05	4.0842	7.96813e-05	-0.130139	-4.45421		+	1.23805e-08	7.90726	0	-0.143533	-6.75027		+	0.0234157	1.63049	0.153954	0.0876182	2.30337			0.00507721	2.29438	0.0102987	-0.0937955	-2.85798		+	19.0732	19.1477	18.7518	18.5057	18.7353	18.8865	18.9802	18.6105	18.7468	18.6505	18.7676	18.4889	18.9167	18.8776	18.734	18.8654	18.7506	18.783
Q13557	CAMK2D	Calcium/calmodulin-dependent protein kinase type II subunit delta	Neuron	0.0274316	1.56175	0.0370363	-0.121335	-2.30153		+	1.09036e-05	4.96243	4.79616e-06	-0.128571	-4.86818		+	3.42873e-09	8.46487	0	0.344359	6.50973		+	0.012842	1.89137	0.0241899	-0.12043	-2.52831		+	17.4983	17.6114	17.2694	16.9461	17.2201	17.3592	17.4546	17.0421	17.2711	16.5801	16.98	17.0571	17.3425	17.2274	17.3002	17.2721	17.0858	16.7477
Q13555-11	CAMK2G	Calcium/calmodulin-dependent protein kinase type II subunit gamma	Undefined	5.12221e-05	4.29054	4.26439e-05	-0.150563	-4.61374		+	6.30756e-10	9.20014	0	-0.175969	-7.5616		+	3.68339e-06	5.43375	0.00035969	0.235411	4.91312		+	0.0117935	1.92836	0.0223013	0.107942	2.5598		+	16.1651	16.0496	15.8717	15.8937	15.6687	15.9619	15.914	16.1265	15.7402	15.7354	15.7462	15.5232	15.8728	15.7754	15.4309	16.0101	15.9969	15.7808
Q16566	CAMK4	Calcium/calmodulin-dependent protein kinase type IV	Undefined	0.0429106	1.36744	0.0586145	-0.0789565	-2.10102			0.00229677	2.63888	0.00182477	-0.0960017	-3.20692		+	0.713727	0.146468	0.855442	-0.0230435	-0.367942			4.54017e-14	13.3429	0	-0.424917	-8.62548		+	13.333	13.4012	13.4788	13.1419	13.0655	13.1649	13.4751	13.2738	13.1415	12.7532	12.856	13.3391	13.2856	12.9468	13.517	12.957	13.0216	12.5276
Q8N5S9	CAMKK1	Calcium/calmodulin-dependent protein kinase kinase 1	Undefined	0.000414719	3.38225	0.000663507	-0.18185	-3.90151		+	0.00141409	2.84952	0.00106333	-0.117437	-3.37217		+	1.56231e-10	9.80623	0	0.402136	7.16836		+	0.85145	0.0698409	0.90002	0.0109298	0.187698			14.6473	14.7926	14.8595	14.344	14.7852	14.8536	14.6522	14.8148	14.3166	14.5221	14.9009	14.8969	14.7155	14.6992	14.3053	14.6251	14.7171	14.4734
Q96RR4	CAMKK2	Calcium/calmodulin-dependent protein kinase kinase 2	Undefined	0.982781	0.00754332	0.986821	0.000894838	0.0217375			0.910848	0.0405539	0.920597	-0.00444437	-0.112515			0.000203281	3.6919	0.0074252	0.191239	3.86316		+	5.78131e-06	5.23797	2.43902e-05	-0.251763	-4.75984		+	13.7029	13.8207	13.7932	13.7071	13.6246	13.3823	13.7466	13.5075	13.8238	13.5508	13.6071	13.7445	13.9153	13.1398	13.8337	13.4044	13.7653	13.2554
Q8NCB2	CAMKV	CaM kinase-like vesicle-associated protein	Neuron	2.12978e-06	5.67166	0	-0.260533	-5.66577		+	1.29405e-15	14.888	0	-0.318431	-11.2995		+	0.0029647	2.52802	0.0454689	0.192816	3.04926		+	0.112287	0.949671	0.172145	-0.0755029	-1.60047			16.7247	16.6823	15.8854	15.9811	15.9342	16.0783	16.2533	16.073	15.9433	16.0135	16.3552	16.217	16.1476	16.0034	16.2386	16.0859	15.9882	16.0684
Q8NCB2-3	CAMKV	CaM kinase-like vesicle-associated protein	Neuron	0.0028369	2.54716	0.00375147	-0.327578	-3.21063		+	3.37154e-09	8.47217	0	-0.389205	-7.1045		+	0.198287	0.702705	0.463183	0.132467	1.2954			6.28368e-08	7.20179	0	0.492997	5.79484		+	14.3905	15.2056	15.1037	14.3929	13.8276	14.3333	14.9075	14.0996	14.4303	14.9677	15.022	14.585	15.021	15.1353	15.0502	14.6794	13.9259	14.9515
Q5T5Y3	CAMSAP1	Calmodulin-regulated spectrin-associated protein 1	Undefined	0.895649	0.047862	0.921181	-0.0107952	-0.132116			0.830915	0.0804434	0.84983	0.0183982	0.214626			0.000985662	3.00627	0.0223491	-0.299386	-3.4015		+	0.126378	0.89833	0.191021	0.14606	1.54012			13.4988	13.6209	13.3303	15.5521	15.2583	13.8645	14.1294	13.9605	14.17	14.6127	13.9727	13.9316	13.7972	14.0471	14.2901	14.2045	14.9661	14.2283
Q08AD1	CAMSAP2	Calmodulin-regulated spectrin-associated protein 2	Undefined	0.00324751	2.48845	0.00419244	-0.186163	-3.16002		+	4.08934e-05	4.38835	1.69851e-05	-0.234717	-4.48229		+	1.58373e-07	6.80032	1.74672e-05	0.423196	5.65767		+	0.409057	0.388216	0.513078	-0.0540469	-0.828637			13.2694	13.6941	13.1333	13.2529	13.2466	13.3909	13.6142	13.476	12.998	13.1572	13.3895	13.4692	13.4806	13.315	13.3109	13.2791	13.0572	13.3668
Q9P1Y5	CAMSAP3	Calmodulin-regulated spectrin-associated protein 3	Undefined	0.0108968	1.9627	0.0145382	-0.0626592	-2.68919		+	0.000460622	3.33666	0.000341969	-0.104327	-3.73953		+	5.5172e-07	6.25828	9.26641e-05	0.172308	5.36839		+	0.01164	1.93405	0.0220311	-0.0742094	-2.56462		+	14.6692	14.6146	14.6307	14.6205	14.4017	14.5973	14.4316	14.447	14.4073	14.5382	14.5364	14.5746	14.4741	14.4062	14.2126	14.4658	14.3205	14.3333
Q86VP6	CAND1	Cullin-associated NEDD8-dissociated protein 1	Undefined	1.34368e-07	6.8717	0	-0.168937	-6.57909		+	1.00941e-06	5.99593	0	-0.130866	-5.54152		+	0.0630364	1.20041	0.261435	0.0707078	1.88075			0.862828	0.064076	0.906872	-0.00518305	-0.17317			14.876	14.8255	14.5247	14.29	14.5518	14.7174	14.5563	14.4895	14.5865	14.4795	14.367	14.2302	14.6595	14.5183	14.4806	14.526	14.4174	14.4291
O75155	CAND2	Cullin-associated NEDD8-dissociated protein 2	Undefined	0.743924	0.128472	0.7989	0.0353439	0.329594			0.63796	0.195206	0.656766	-0.0710494	-0.473762			2.28107e-06	5.64186	0.000246353	-0.567587	-5.04393		+	0.119711	0.921864	0.182576	-0.225054	-1.56818			9.6478	13.3792	12.5963	13.6353	14.1107	14.3219	13.687	13.7302	13.1691	12.8237	12.8123	13.2826	13.1082	12.702	13.4426	13.0792	12.7017	13.1885
P27824	CANX	Calnexin	Undefined	0.00193239	2.71391	0.00258911	-0.136676	-3.35267		+	0.00056312	3.2494	0.000426985	-0.0884439	-3.67506		+	0.552307	0.257819	0.75755	0.0301767	0.596407			0.00924107	2.03428	0.0179877	0.103439	2.64852		+	15.809	15.9483	15.2508	15.6569	15.668	15.4301	15.4169	15.4773	15.5128	15.8572	15.8123	15.7493	15.5958	15.9114	15.6613	15.7201	15.6431	16.0793
Q01518	CAP1	Adenylyl cyclase-associated protein 1	Undefined	0.000876778	3.05711	0.00125457	0.126125	3.63806		+	1.02441e-08	7.98952	0	0.182855	6.80186		+	0.00177148	2.75166	0.0328391	0.1355	3.21608		+	0.0558961	1.25262	0.0935953	-0.0700439	-1.93174			14.1154	14.1254	13.7993	13.866	13.9431	14.1436	13.9424	13.9343	13.8311	13.6629	13.8262	13.5348	13.9157	14.0581	13.8082	14.004	13.7148	13.8468
P40123	CAP2	Adenylyl cyclase-associated protein 2	Neuron	0.00725743	2.13922	0.0094498	-0.073123	-2.85121		+	1.6251e-07	6.78912	0	-0.116784	-6.04662		+	0.962264	0.0167058	0.983472	0.0022576	0.0474365			1.27503e-11	10.8945	0	-0.379936	-7.53972		+	15.5856	15.9448	15.6507	15.6132	15.5166	15.592	15.9518	15.527	15.8845	15.1966	15.2763	15.6511	15.6114	15.6022	15.8579	15.5696	15.588	15.3028
P07384	CAPN1	Calpain-1 catalytic subunit	Undefined	0.359053	0.444842	0.432335	0.040338	0.92939			0.838505	0.0764942	0.857469	0.00708382	0.204829			0.13779	0.860782	0.38791	0.0628517	1.49655			0.205509	0.687169	0.289615	0.050324	1.27334			14.9278	14.714	15.0067	15.3681	15.3435	14.8039	14.7391	15.1159	14.8788	15.0439	14.9309	14.8272	14.9519	15.0679	14.8989	14.944	15.1042	14.9575
O15484	CAPN5	Calpain-5	Undefined	0.000460969	3.33633	0.000734059	-0.209936	-3.86465		+	0.00089793	3.04676	0.000643265	-0.186359	-3.52319		+	9.31871e-13	12.0306	0	-0.54993	-8.22831		+	0.0967211	1.01448	0.151598	-0.0980741	-1.67489			13.3095	13.3929	13.3604	12.8726	12.8048	13.2185	13.0264	12.8568	13.1189	13.1451	13.0904	13.2583	13.0137	13.1892	12.7399	12.5891	12.0803	13.1621
P04632	CAPNS1	Calpain small subunit 1	Undefined	0.275113	0.560489	0.341649	-0.0354747	-1.10872			0.00834556	2.07854	0.00739055	-0.0722387	-2.7424		+	3.39291e-07	6.46943	2.42424e-05	0.250172	5.48192		+	0.000375299	3.42562	0.000850547	0.14843	3.66727		+	15.7145	15.4463	15.3925	15.2091	15.4214	15.5018	15.3203	15.2542	15.2573	15.5993	15.4119	15.2249	15.3095	15.6514	15.0983	15.5845	15.1882	15.5014
Q14444	CAPRIN1	Caprin-1	Undefined	0.0467548	1.33017	0.0636511	-0.139796	-2.06139			0.000141089	3.85051	9.28433e-05	-0.195356	-4.10947		+	0.0462941	1.33447	0.222916	0.13781	2.01883			0.1367	0.86423	0.203512	0.0829598	1.49885			13.6637	13.5211	14.0463	13.1626	13.354	13.5715	13.4121	13.2532	13.5769	13.4478	13.7773	13.4847	13.6683	13.5661	13.5355	13.4863	13.6448	13.6862
P52907	CAPZA1	F-actin-capping protein subunit alpha-1	Undefined	0.042694	1.36963	0.0583948	0.125867	2.10334			0.00429513	2.36702	0.00359317	0.103446	2.9866		+	1.82345e-08	7.73911	1.11111e-05	-0.398828	-6.14398		+	0.000558078	3.2533	0.00124598	-0.162139	-3.55238		+	14.1806	14.2796	14.6279	14.3667	14.8016	14.3042	14.3631	14.268	14.5064	13.9841	14.6611	14.5534	14.3436	14.339	14.2537	14.6899	14.7381	14.5345
P47755	CAPZA2	F-actin-capping protein subunit alpha-2	Undefined	0.064754	1.18873	0.087095	-0.0786506	-1.90701			0.84103	0.0751887	0.860005	0.00548077	0.201582			1.29979e-12	11.8861	0	-0.427532	-8.16026		+	1.26752e-07	6.89705	0	-0.307118	-5.641		+	15.8958	15.9338	15.6091	15.4494	15.6234	15.6359	15.7494	15.5318	15.6519	15.4084	15.8033	15.5794	15.7673	15.8058	15.8443	15.6669	15.5486	15.5776
P47756	CAPZB	F-actin-capping protein subunit beta	Undefined	0.418222	0.378593	0.49467	0.0346024	0.819188			0.000372545	3.42882	0.000282436	0.0741198	3.80706		+	2.94391e-17	16.5311	0	0.383722	10.3278		+	0.257829	0.588668	0.348058	0.0406371	1.13727			15.3228	15.2853	15.0171	14.9162	15.1911	15.1255	15.1924	15.0878	14.9775	14.9437	15.0601	14.7398	15.0484	15.161	15.1991	15.2206	14.8736	14.7955
P47756-1	CAPZB	F-actin-capping protein subunit beta	Undefined	0.0262119	1.5815	0.0354586	0.137291	2.32139		+	8.6595e-11	10.0625	0	0.262002	8.106		+	0.017474	1.75761	0.13176	0.19367	2.41841			7.95037e-10	9.09961	0	0.509795	6.71411		+	14.9398	14.6829	14.7521	15.0195	14.7724	14.9574	14.6922	14.6978	14.7996	14.9577	15.3496	14.8843	14.5946	14.6822	14.1085	14.7118	14.4979	14.6882
Q6F5E8	CARMIL2	Capping protein, Arp2/3 and myosin-I linker protein 2	Undefined	0.00240027	2.61974	0.00326392	-0.105085	-3.27276		+	4.23855e-08	7.37278	0	-0.17901	-6.41465		+	1.32802e-06	5.8768	0.000187175	0.214517	5.16027		+	8.27699e-07	6.08213	1.02302e-05	-0.226043	-5.21845		+	15.774	15.6663	15.6846	15.7246	15.696	15.6434	15.6503	15.7358	15.5685	15.2345	15.3249	15.9497	15.5927	15.3534	15.6165	15.5967	15.6539	15.2984
P49589	CARS1	Cysteine--tRNA ligase, cytoplasmic	Undefined	0.0405744	1.39175	0.0555959	-0.0962549	-2.12665			0.13786	0.860562	0.14731	-0.0436766	-1.50701			0.326503	0.486113	0.590788	-0.0394289	-0.986224			0.937292	0.0281252	0.962493	0.00291298	0.0788495			14.2781	14.1388	14.3328	14.2658	14.0837	14.3039	14.1707	13.7132	14.2682	13.8968	14.0673	13.9849	14.4352	13.9594	13.7788	14.1702	14.0403	14.219
O14936	CASK	Peripheral plasma membrane protein CASK	OPC	0.00802318	2.09565	0.0104773	-0.113893	-2.81164		+	0.0165283	1.78177	0.015442	-0.12836	-2.47723		+	1.71958e-05	4.76458	0.00105263	0.313527	4.5266		+	0.000103206	3.9863	0.000289855	0.277326	4.02552		+	13.2543	13.6495	13.3375	13.1979	13.3178	13.7533	13.572	13.3403	13.4433	13.4325	13.4715	13.5553	13.9736	13.6594	13.2492	13.1159	13.116	13.7235
Q8WXD9	CASKIN1	Caskin-1	Undefined	0.094857	1.02293	0.126107	-0.0801206	-1.71679			0.049004	1.30977	0.0501477	-0.0610237	-2.01578			0.000127075	3.89594	0.00528497	0.192275	3.99444		+	1.0943e-14	13.9609	0	-0.421149	-8.89485		+	14.2286	14.3397	14.2191	13.9726	13.7321	13.9585	14.3857	13.8691	14.1557	13.6091	14.1229	14.503	14.0394	13.969	14.2109	13.7937	14.051	13.8337
P31944	CASP14	Caspase-14	Undefined	0.45902	0.338168	0.535246	0.401308	0.751217			0.0887582	1.05179	0.0945859	0.298164	1.73651			0.047919	1.31949	0.227233	-0.711464	-2.00779			0.994479	0.00240452	0.996775	-0.00151995	-0.00693649			13.5891	12.7864	13.8621	16.1309	15.8992	13.9466	13.5073	15.1015	12.7289	14.227	12.3748	13.8709	12.7296	13.2668	14.4108	14.6699	15.7291	12.9257
P04040	CAT	Catalase	Undefined	0.0299846	1.5231	0.040635	0.404181	2.26241		+	0.121086	0.916906	0.129338	0.163695	1.57602			0.428404	0.368146	0.67232	-0.119679	-0.795294			0.00145264	2.83784	0.00321584	0.409697	3.26423		+	12.9536	12.9362	13.1596	14.912	14.891	13.3554	12.8399	14.3857	12.9279	13.8475	13.498	13.2013	13.3216	13.6981	14.5216	14.2807	14.6107	13.3704
Q8N350	CBARP	Voltage-dependent calcium channel beta subunit-associated regulatory protein	Undefined	0.00512123	2.29063	0.00641801	-0.296661	-2.98683		+	0.000305282	3.5153	0.000223827	-0.365434	-3.88097		+	0.0568858	1.245	0.24788	0.244407	1.9274			0.0152651	1.8163	0.0281444	-0.279955	-2.46352		+	12.5042	12.2368	13.1784	13.3548	12.7196	13.2274	13.7586	12.6809	13.054	12.1463	13.4106	13.6673	13.6384	12.8662	13.5977	12.6022	12.9039	12.659
P16152	CBR1	Carbonyl reductase	Undefined	0.0409034	1.38824	0.0559618	-0.0719517	-2.12297			0.698089	0.156089	0.718948	-0.0101755	-0.390055			0.237753	0.623874	0.507904	-0.0626492	-1.18803			0.000698506	3.15583	0.00157965	0.179114	3.48626		+	16.9363	16.447	16.5833	16.2696	16.3829	16.8564	16.4062	16.083	16.5876	16.6069	17.1293	16.0214	16.9355	16.7297	16.3734	16.693	16.4012	17.1288
O75828	CBR3	Carbonyl reductase	Undefined	0.915834	0.038183	0.936628	-0.00623314	-0.106448			0.000731063	3.13605	0.000527106	0.183428	3.5905		+	0.0612244	1.21308	0.257739	0.184547	1.89408			0.00132833	2.87669	0.00293788	0.299109	3.29191		+	14.1914	13.1956	14.3397	13.3618	13.8822	14.2385	13.8621	13.2788	13.2355	13.7664	14.6088	13.6347	14.1654	13.3202	12.7964	13.7003	14.077	14.3874
P35520	CBS	Cystathionine beta-synthase	Undefined	0.272009	0.565417	0.338448	-0.290424	-1.12136			0.0924707	1.034	0.0983349	0.203566	1.71909			0.858432	0.066294	0.93129	-0.0266412	-0.178925			0.284808	0.545448	0.379345	0.163123	1.07546			12.4445	10.7685	11.6167	6.83189	10.8061	12.0129	10.2053	9.43147	12.283	11.5401	11.5507	NaN	11.5792	11.7127	11.0131	11.9277	11.9184	11.6805
Q6P1N0	CC2D1A	Coiled-coil and C2 domain-containing protein 1A	Undefined	0.251067	0.60021	0.316117	0.0473881	1.16708			0.441157	0.355407	0.459349	0.0216824	0.776183			0.000235465	3.62807	0.00812308	-0.200687	-3.82151		+	3.9663e-06	5.40161	1.72786e-05	0.217045	4.85068		+	12.6889	12.8005	12.9355	12.9644	12.8484	12.8216	12.6277	12.5671	12.8765	12.6536	13.1336	12.7722	12.8095	12.8103	12.596	12.9067	12.6298	12.9037
Q5T0F9	CC2D1B	Coiled-coil and C2 domain-containing protein 1B	Undefined	0.25144	0.599565	0.316301	-0.130244	-1.16734			0.72794	0.137904	0.748291	-0.0388179	-0.349949			0.00195911	2.70794	0.0348799	0.416716	3.18488		+	0.580536	0.236171	0.682805	-0.0763739	-0.554261			13.3947	13.1823	13.2508	12.4905	12.187	13.1776	12.7903	11.8155	12.2079	13.1616	13.0287	12.629	13.1785	12.2674	NaN	13.0378	11.4892	12.8554
Q8N163	CCAR2	Cell cycle and apoptosis regulator protein 2	Undefined	0.154937	0.809844	0.202479	-0.0780704	-1.4537			0.0230034	1.63821	0.0218519	-0.0804198	-2.34276		+	0.0417097	1.37976	0.211024	0.089633	2.06406			0.252253	0.598163	0.341455	0.0412954	1.15078			14.1324	13.8723	13.9368	13.7708	13.7805	13.9778	13.7763	13.8854	13.7996	13.9823	14.0267	14.0108	13.8862	13.6182	13.6872	13.7874	13.9432	13.8125
Q96CT7	CCDC124	Coiled-coil domain-containing protein 124	Undefined	0.727324	0.138272	0.784239	0.0248964	0.351495			0.201932	0.694795	0.213895	0.0713217	1.2924			0.668117	0.175148	0.83215	0.0359474	0.430059			0.0730329	1.13648	0.11895	0.120321	1.80949			13.7014	13.7406	13.9029	13.5154	13.8488	14.1291	13.9691	13.7874	13.6851	13.6086	13.8788	13.5596	13.8449	13.2569	13.7803	13.3118	13.815	13.2754
Q9NQR7	CCDC177	Coiled-coil domain-containing protein 177	Undefined	0.0399641	1.39833	0.0547861	-0.177048	-2.13357			0.284694	0.545622	0.300143	-0.221294	-1.0812			4.86528e-05	4.31289	0.00242326	0.345782	4.25483		+	0.0666125	1.17644	0.109379	-0.152282	-1.85216			12.2709	13.0278	13.543	13.3132	12.9871	12.9208	13.2949	13.2175	12.4131	13.3057	13.3784	13.6591	13.2674	13.5109	13.3423	13.1843	13.0503	13.1909
O60826	CCDC22	Coiled-coil domain-containing protein 22	Undefined	0.000325663	3.48723	0.000562092	0.189906	3.9854		+	8.76488e-06	5.05725	4.86618e-06	0.237699	4.93095		+	0.000681772	3.16636	0.0174613	-0.182612	-3.51107		+	0.658751	0.181279	0.746463	0.024264	0.442808			13.8727	13.6	13.5432	13.6429	13.4229	13.3575	13.4871	13.5969	13.5191	13.5713	14.0649	13.6355	13.5116	13.5671	13.2411	13.3164	13.1655	13.989
Q96MW1	CCDC43	Coiled-coil domain-containing protein 43	Undefined	0.0566242	1.247	0.0765357	0.174789	1.9714			0.0810924	1.09102	0.086104	0.123559	1.78037			0.15034	0.822927	0.404552	0.176378	1.45004			0.0334747	1.47528	0.0582832	0.256118	2.15286			12.985	12.953	12.4599	13.6627	12.7365	13.5551	13.5455	12.8598	12.9183	13.2356	13.4822	13.2775	13.0648	13.101	13.8437	13.2612	13.2548	13.2825
Q16204	CCDC6	Coiled-coil domain-containing protein 6	Undefined	0.404401	0.393188	0.480348	-0.0337558	-0.844001			0.00233735	2.63128	0.0018494	-0.0668068	-3.20087		+	0.0498768	1.3021	0.232083	0.0791243	1.98607			0.184927	0.732999	0.265837	0.0458238	1.33387			14.0922	14.1772	13.8453	13.5708	13.5217	14.0481	13.8784	13.6169	13.4924	13.7392	13.8297	13.7731	13.9199	13.9712	13.7245	13.8917	13.5815	13.731
Q53HC0	CCDC92	Coiled-coil domain-containing protein 92	Undefined	0.0460533	1.33674	0.0627046	-0.209205	-2.0684			0.00884579	2.05326	0.00788087	-0.139855	-2.72041		+	6.60031e-10	9.18044	0	-0.57335	-6.86349		+	0.918206	0.0370597	0.94749	0.00709417	0.102923			13.2098	12.9966	13.2612	12.6065	12.4098	13.1274	12.9888	12.7739	12.8633	12.5038	13.0648	13.0247	13.0083	12.7914	12.6293	12.5091	12.146	12.5565
P06307	CCK	Cholecystokinin	Neuron	0.00619945	2.20765	0.0077541	0.18413	2.91286		+	0.000315143	3.50149	0.000226823	0.15187	3.85992		+	1.12635e-08	7.94832	1.2012e-05	0.411466	6.25022		+	0.397607	0.400546	0.500916	-0.0469227	-0.849125			15.4639	15.7148	15.5926	15.1382	15.5383	15.4868	15.7172	15.346	15.5492	14.7512	15.4012	15.7804	15.6754	15.574	15.7992	16.0294	15.6196	15.5886
Q8ND76	CCNY	Cyclin-Y	Undefined	0.0516928	1.28657	0.0696743	-0.379145	-2.01658			4.82032e-05	4.31692	2.10084e-05	-0.346946	-4.43348		+	0.000292433	3.53397	0.0095419	-0.538212	-3.76261		+	0.174235	0.758866	0.252456	0.129788	1.36741			12.0589	12.0726	12.4618	12.9615	12.8804	12.863	12.9268	13.0175	13.2172	12.4484	13.3152	13.2238	13.0917	12.9577	13.5596	12.6605	12.6609	12.0033
O14618	CCS	Copper chaperone for superoxide dismutase	Undefined	0.50244	0.298916	0.58091	-0.0223866	-0.677665			0.856289	0.0673796	0.872831	-0.00757561	-0.182002			0.000212039	3.67358	0.00763209	0.233974	3.85123		+	0.0240475	1.61893	0.0428313	0.126201	2.28718		+	13.9518	14.1552	14.0486	13.8184	14.0567	13.8732	13.8935	13.7818	13.8536	14.0183	14.0014	14.1222	13.9834	13.7391	14.1051	13.7787	14.0936	13.8767
P78371	CCT2	T-complex protein 1 subunit beta	Undefined	0.23594	0.627198	0.299769	-0.0394998	-1.20591			2.5404e-06	5.5951	0	-0.106201	-5.28294		+	7.09289e-21	20.1492	0	0.432185	12.0313		+	0.54478	0.263779	0.647729	0.0184659	0.607437			16.0214	15.9441	15.975	15.6327	15.761	16.0224	15.8838	15.6865	15.7514	15.7681	15.7985	15.6303	16.042	15.7718	15.8246	15.853	15.7901	15.7726
P49368	CCT3	T-complex protein 1 subunit gamma	Undefined	3.10479e-05	4.50797	2.77778e-05	-0.100931	-4.78084		+	2.01072e-09	8.69665	0	-0.125221	-7.24531		+	3.64078e-09	8.43881	0	0.181165	6.49672		+	0.00123496	2.90835	0.00271125	-0.0827752	-3.31435		+	16.4346	16.3458	16.3411	16.0714	16.1662	16.4039	16.3306	16.0898	16.1903	16.1231	16.1572	16.1027	16.4313	16.1825	16.1911	16.2655	16.142	16.2584
P50991	CCT4	T-complex protein 1 subunit delta	Undefined	0.0248649	1.60441	0.0336785	-0.0696595	-2.34432		+	4.80418e-06	5.31838	5.06971e-06	-0.0938807	-5.10266		+	9.74442e-21	20.0112	0	0.519637	11.9656		+	0.191017	0.718927	0.273108	0.0517535	1.31546			16.4267	16.4616	16.4552	16.0334	16.066	16.4963	16.3664	16.1318	16.1982	16.0915	16.1438	15.9298	16.3956	16.162	16.218	16.3085	16.1029	16.1815
P48643	CCT5	T-complex protein 1 subunit epsilon	Undefined	0.00147132	2.83229	0.00188903	-0.0954619	-3.45209		+	2.33193e-06	5.63228	0	-0.0979337	-5.30705		+	0.00471427	2.32659	0.0606421	0.145389	2.89353			0.0400862	1.39701	0.0686885	0.0864553	2.07681			14.5032	14.4992	14.6118	14.0506	14.2501	14.6366	14.5443	14.2039	14.28	14.2531	14.2663	14.1307	14.5552	14.3479	14.3089	14.2444	14.2697	14.3154
P40227	CCT6A	T-complex protein 1 subunit zeta	Undefined	0.0900043	1.04574	0.119663	-0.0433533	-1.74362			1.05081e-06	5.97848	0	-0.102889	-5.53031		+	4.81269e-10	9.31761	0	0.276419	6.93065		+	0.0877549	1.05673	0.138144	0.0613594	1.72228			16.4042	16.3544	16.5568	16.08	16.3384	16.5336	16.3307	16.1829	16.18	16.1418	16.2872	16.1323	16.5625	16.1473	15.99	16.2564	16.2191	16.1778
Q99832	CCT7	T-complex protein 1 subunit eta	Undefined	0.000225213	3.64741	0.000451499	-0.102345	-4.11246		+	2.60201e-06	5.58469	0	-0.11805	-5.27619		+	0.521641	0.282629	0.737002	0.0207319	0.64318			0.176817	0.752477	0.255845	-0.0425116	-1.35912			16.2806	16.3103	16.2391	15.8965	16.0594	16.4242	16.1116	15.9073	16.0468	15.872	15.9791	15.9248	16.2949	16.067	15.926	16.031	16.0236	15.9371
P50990	CCT8	T-complex protein 1 subunit theta	Undefined	0.00496906	2.30373	0.00625054	-0.0735886	-2.99843		+	3.14242e-07	6.50274	0	-0.124727	-5.86506		+	2.70171e-09	8.56836	0	0.309429	6.56128		+	0.747765	0.126235	0.821777	0.0132873	0.322374			17.1773	17.2002	17.0443	16.7045	16.9599	17.1472	17.0213	16.9696	16.9724	16.9529	16.9057	16.7138	17.0815	16.8709	16.7749	16.9833	16.8445	16.8757
P08571	CD14	Monocyte differentiation antigen CD14	Undefined	0.000229179	3.63983	0.000464789	0.438157	4.39625		+	0.26007	0.58491	0.274271	0.270161	1.15237			1.52277e-06	5.81736	0.000190801	0.567878	5.26233		+	0.670855	0.173371	0.756822	-0.0589938	-0.426675			NaN	13.8889	14.21	13.7425	13.4568	11.835	NaN	12.4681	13.3481	NaN	13.4061	13.6998	12.7531	13.5473	NaN	14.0125	NaN	13.7775
Q86VB7	CD163	Scavenger receptor cysteine-rich type 1 protein M130	Undefined	0.668071	0.175177	0.732221	-0.339147	-0.445062			0.117985	0.928172	0.125923	0.71907	1.63748			0.491745	0.30826	0.716944	0.24093	0.696067			0.127602	0.894141	0.192221	-0.673527	-1.55678			9.31008	8.05927	NaN	11.0297	11.6671	9.38992	9.27639	NaN	NaN	11.1091	9.85062	NaN	NaN	9.29306	NaN	9.88458	9.1451	NaN
Q08722	CD47	Leukocyte surface antigen CD47	Undefined	7.20191e-10	9.14255	0	-0.375808	-8.3683		+	4.12547e-16	15.3845	0	-0.343074	-11.6489		+	0.562758	0.249678	0.763984	0.0502964	0.580768			0.821221	0.0855398	0.8802	-0.0180189	-0.226501			16.694	17.3574	16.1254	16.2769	16.506	16.9516	16.8053	16.4048	16.7008	16.2641	16.2976	16.2238	16.4689	16.4762	16.3215	16.5539	16.1426	16.594
P13987	CD59	CD59 glycoprotein	Undefined	0.000131884	3.87981	0.000120301	-0.37157	-4.29506		+	5.84826e-11	10.233	0	-0.281724	-8.21417		+	0.590972	0.228433	0.782582	0.0704375	0.539237			0.579458	0.236978	0.681811	0.0488351	0.555783			14.9157	15.1475	13.6962	13.8369	14.0566	14.5964	14.4778	14.0105	14.1673	14.4269	13.6797	14.409	14.1507	14.524	14.5662	13.9299	14.2221	13.9326
Q8TCZ2	CD99L2	CD99 antigen-like protein 2	Undefined	0.0812266	1.0903	0.108647	-0.196791	-1.80043			0.358464	0.445554	0.377202	-0.122851	-0.927586			0.503393	0.298093	0.724982	-0.108878	-0.671719			0.00182738	2.73817	0.00394269	-0.466381	-3.19457		+	12.4644	11.3964	12.2929	12.6924	12.0482	11.5548	13.1099	12.5545	12.5087	12.1491	11.751	13.1171	12.4063	11.6618	12.395	13.364	12.0967	NaN
Q16543	CDC37	Hsp90 co-chaperone Cdc37	Undefined	0.284329	0.546179	0.35171	-0.056261	-1.08731			5.39275e-06	5.26819	5e-06	-0.120824	-5.06978		+	0.82091	0.0857045	0.912595	0.0105573	0.226995			0.000128979	3.88948	0.000333333	-0.161756	-3.9652		+	15.7709	15.6568	15.5669	15.5035	15.4459	15.7129	15.6596	15.5098	15.6337	15.5814	15.4758	15.4659	15.7893	15.6442	15.481	15.7252	15.5672	15.5474
P60953	CDC42	Cell division control protein 42 homolog	Undefined	4.68113e-05	4.32965	4.33839e-05	-0.171894	-4.64386		+	1.64973e-14	13.7826	0	-0.19765	-10.538		+	0.00242381	2.6155	0.0401088	0.191564	3.11523		+	0.0132933	1.87637	0.0249471	-0.123016	-2.51546		+	15.9664	16.2305	15.1095	15.3806	15.6302	15.7653	15.6269	15.4813	15.4162	15.5154	15.0745	14.8905	15.4018	15.2489	15.3153	15.6727	15.1518	15.4318
P60953-1	CDC42	Cell division control protein 42 homolog	Undefined	0.0121405	1.91576	0.0161741	-0.329034	-2.64531		+	0.0127968	1.8929	0.0116514	-0.289906	-2.58021		+	0.923412	0.0346044	0.964174	0.0114633	0.0963923			0.827972	0.0819845	0.884219	0.0228585	0.217812			10.2168	13.7777	14.3179	14.6593	14.9654	14.4514	14.9384	14.5181	14.8941	14.7924	13.8489	14.3509	15.0477	14.1096	14.4561	14.7263	14.946	14.5625
Q9Y5S2	CDC42BPB	Serine/threonine-protein kinase MRCK beta	Undefined	0.257583	0.589082	0.32345	-0.0410992	-1.15088			0.436601	0.359916	0.455206	-0.0151075	-0.783994			6.04631e-06	5.21851	0.000469897	-0.215309	-4.79067		+	0.000301127	3.52125	0.000759494	-0.113438	-3.72999		+	13.107	12.9978	12.9335	13.1446	12.9711	12.9976	13.0136	12.8991	12.7632	13.0801	12.959	12.9871	13.0573	13.0167	13.0161	12.9497	12.9316	12.9176
Q9H3Q1	CDC42EP4	Cdc42 effector protein 4	Undefined	0.027544	1.55997	0.0371618	0.123223	2.30269		+	2.13697e-05	4.6702	4.49438e-06	0.150235	4.67308		+	0.468373	0.329409	0.702459	0.048663	0.728083			0.0126045	1.89948	0.0238095	0.149196	2.5356		+	14.4466	14.5197	14.569	14.7692	14.2142	14.686	14.6431	14.3392	14.6425	14.6978	15.0634	14.3275	14.1718	14.6754	14.1859	14.4966	14.42	14.4246
Q9Y6N8	CDH10	Cadherin-10	Neuron	0.472169	0.325903	0.549386	-0.058604	-0.726822			0.102	0.991399	0.108734	-0.216781	-1.66783			0.0897882	1.04678	0.313608	0.271772	1.71401			0.286758	0.542485	0.381851	-0.171778	-1.07041			11.7249	12.1294	11.6866	12.7006	12.3523	11.5349	12.0426	12.2599	12.7506	11.9728	12.2819	12.3906	12.1592	11.4421	12.3528	12.4123	12.5082	11.6823
P55290	CDH13	Cadherin-13	Neuron	0.00137329	2.86224	0.00174707	-0.151264	-3.47707		+	4.01157e-08	7.39669	0	-0.24171	-6.42968		+	0.0048009	2.31868	0.0613806	0.237541	2.8873			0.0875314	1.05784	0.137969	-0.126178	-1.72351			15.2616	15.0059	14.6291	14.8123	14.2002	14.5616	15.0536	14.4183	14.3395	14.8638	14.658	14.757	14.5991	14.7381	14.7439	14.7909	14.1252	14.6896
P19022	CDH2	Cadherin-2	Undefined	0.454016	0.342929	0.531126	-0.0468517	-0.75717			0.721434	0.141804	0.743202	0.0136108	0.358482			0.236558	0.626062	0.506858	0.0671163	1.19108			0.143872	0.842025	0.213089	0.0660159	1.47174			14.6915	14.3683	14.2522	14.3527	14.0491	14.3958	14.4034	13.971	14.4583	14.4843	14.6989	14.6241	14.5101	14.4577	14.2458	14.4719	14.1721	14.4847
Q9HBT6	CDH20	Cadherin-20	Undefined	0.0136312	1.86546	0.0181785	0.350009	2.73394		+	0.504802	0.296879	0.522179	0.110902	0.673521			0.391214	0.407586	0.643366	-0.159713	-0.863661			0.00852325	2.06939	0.0167372	-0.532569	-2.69725		+	10.8961	10.4766	NaN	10.7051	11.7547	12.9782	10.4277	10.4388	11.1422	12.203	13.1364	NaN	12.8972	11.7273	10.0344	10.8137	10.2387	11.9669
Q9H305	CDIP1	Cell death-inducing p53-target protein 1	Undefined	0.0199994	1.69898	0.0271312	-0.242626	-2.43774		+	1.74442e-05	4.75835	4.57666e-06	-0.219428	-4.7322		+	0.0176122	1.75419	0.132283	-0.21484	-2.41537			4.56091e-10	9.34095	0	-0.563114	-6.82715		+	15.5379	15.7876	15.1317	15.7803	14.3866	15.2292	15.7303	14.9686	15.2772	14.7477	15.1318	15.9221	15.2038	15.4362	15.5612	15.4875	15.0982	14.4023
Q07002	CDK18	Cyclin-dependent kinase 18	Undefined	0.0813985	1.08938	0.10882	-0.147138	-1.79436			2.51414e-06	5.59961	0	-0.232305	-5.28587		+	0.264451	0.577655	0.534587	0.10847	1.1225			5.79256e-05	4.23713	0.000167183	0.395972	4.17913		+	12.7915	13.3828	13.8554	13.5241	13.2577	13.5977	13.4365	13.372	13.3406	13.2678	13.3406	13.5576	13.8032	13.4473	13.3252	13.4139	13.3404	13.2597
Q00535	CDK5	Cyclin-dependent kinase 5	Undefined	0.000558396	3.25306	0.000812121	-0.161861	-3.79753		+	0.00286507	2.54287	0.00226804	-0.105489	-3.13008		+	4.90305e-06	5.30953	0.000419162	0.303927	4.84265		+	0.867622	0.0616693	0.911019	0.0124606	0.167059			14.2577	14.4032	14.3254	13.8634	14.1513	14.2934	14.3025	14.1945	14.0727	14.0047	14.2243	14.1304	14.2814	14.0112	14.0865	14.0631	14.1027	14.2848
O76039	CDKL5	Cyclin-dependent kinase-like 5	Undefined	0.0456927	1.34015	0.0621725	-0.358239	-2.10306			0.278684	0.554887	0.294053	-0.25259	-1.1064			0.000635453	3.19692	0.0167642	0.57485	3.55444		+	0.00493675	2.30656	0.0100692	-0.558046	-2.88309		+	13.2377	11.2025	NaN	12.4405	NaN	12.6644	13.1879	10.8785	11.9885	12.3254	12.7457	12.7995	10.8499	NaN	12.6684	NaN	12.0631	NaN
O95674	CDS2	Phosphatidate cytidylyltransferase 2	Undefined	0.00169985	2.76959	0.00225537	-0.239505	-3.39957		+	1.91907e-14	13.7169	0	-0.366138	-10.4934		+	0.00162098	2.79022	0.0309715	0.285722	3.24425		+	0.447025	0.349668	0.550165	-0.0493758	-0.763047			13.7643	13.6169	13.1134	13.1983	13.0397	13.3156	13.3169	13.0533	13.0652	13.3955	12.891	13.1385	13.1406	13.3459	13.136	12.7525	13.0196	13.2867
Q15517	CDSN	Corneodesmosin	Undefined	0.109495	0.960605	0.144574	0.625727	1.6478			0.359087	0.444801	0.377681	0.224161	0.925457			0.00650229	2.18693	0.0736671	-0.842843	-2.78553			0.226389	0.645145	0.314009	0.32583	1.21646			13.1896	14.3873	15.7195	18.0866	17.7729	16.6388	15.2784	17.3371	15.3641	15.994	14.0681	14.9965	13.8787	15.455	17.2944	17.3391	17.7809	14.0335
Q9UKY7	CDV3	Protein CDV3 homolog	Undefined	0.445096	0.351546	0.522774	0.0517055	0.772342			0.962572	0.0165666	0.967279	0.00214863	0.0471524			0.000122214	3.91288	0.00513098	-0.347016	-4.00522		+	0.00970878	2.01284	0.0187652	-0.197859	-2.63073		+	13.6713	13.9976	13.5917	13.915	12.9449	13.3845	13.6983	12.8249	13.4227	12.6689	13.3718	13.656	13.1418	12.5433	13.031	13.0323	13.1137	12.9215
O95319	CELF2	CUGBP Elav-like family member 2	Undefined	0.00462183	2.33519	0.0058559	-0.260246	-3.02622		+	1.93561e-06	5.71318	0	-0.438143	-5.37241		+	0.892718	0.0492856	0.948424	-0.0116831	-0.135223			0.104687	0.980106	0.161849	-0.127427	-1.63569			12.8669	12.387	13.3185	11.9346	12.9508	13.1892	13.0761	12.5945	12.9098	12.6286	13.0765	13.136	13.0097	12.9629	13.1456	12.5257	13.1565	12.885
Q9HCU4	CELSR2	Cadherin EGF LAG seven-pass G-type receptor 2	Undefined	0.00038633	3.41304	0.000626198	0.568799	4.15111		+	0.054854	1.26079	0.0561806	0.355135	1.99294			0.0648993	1.18776	0.265221	0.33227	1.8859			0.0928866	1.03205	0.145839	-0.34601	-1.70757			13.338	13.0985	12.8774	NaN	NaN	13.211	12.9882	12.1492	13.2609	13.0005	13.4825	NaN	13.1175	13.2422	NaN	16.9905	NaN	12.9799
Q8N111	CEND1	Cell cycle exit and neuronal differentiation protein 1	Undefined	0.128287	0.891819	0.168788	0.0959082	1.55776			0.150703	0.821878	0.160732	-0.0484301	-1.45855			0.00101532	2.9934	0.0228195	0.267243	3.39011		+	0.00162633	2.78879	0.00361014	-0.208085	-3.22905		+	18.0669	18.5973	17.2928	17.4021	17.5697	17.8133	18.2066	17.772	18.1064	17.4238	17.2614	17.3117	17.395	17.4624	17.8163	17.8579	17.636	17.4798
Q7Z7K6-3	CENPV	Centromere protein V	Undefined	0.00165965	2.77998	0.00219797	-0.369532	-3.4083		+	2.01607e-08	7.69549	0	-0.536985	-6.61739		+	0.0263618	1.57903	0.164911	-0.31776	-2.25567			0.236412	0.626331	0.324335	-0.133822	-1.19033			12.9798	12.356	12.2169	11.8721	12.5406	12.2532	12.2369	12.3291	12.5437	12.7231	13.0126	12.1221	12.0109	12.074	12.4302	11.9576	12.5821	12.2417
Q5SW79	CEP170	Centrosomal protein of 170 kDa	Undefined	0.00109762	2.95955	0.00149932	-0.0882225	-3.55779		+	0.000129146	3.88892	8.56865e-05	-0.102538	-4.13653		+	6.25618e-09	8.20369	0	0.270578	6.37899		+	0.240109	0.619591	0.328034	0.0417983	1.18093			13.6172	13.6216	13.5046	13.4601	13.3801	13.4353	13.6013	13.2919	13.283	13.18	13.5814	13.5818	13.3987	13.2675	13.3753	13.405	13.1485	13.1724
Q9Y4F5-2	CEP170B	Centrosomal protein of 170 kDa protein B	Undefined	0.00251825	2.5989	0.00342308	-0.14695	-3.25497		+	1.01111e-10	9.9952	0	-0.221158	-8.06335		+	2.1045e-07	6.67685	1.69851e-05	0.255021	5.59238		+	9.97983e-10	9.00088	0	-0.310815	-6.66765		+	15.1089	15.1869	14.9325	14.6992	14.3755	14.9273	15.2119	14.8674	14.7106	14.5803	14.8706	15.3805	14.9469	14.582	14.8956	14.5691	14.7311	14.4919
Q9BYV8	CEP41	Centrosomal protein of 41 kDa	Undefined	0.0621489	1.20657	0.0836538	-0.455604	-1.92872			0.0348443	1.45787	0.0345909	-0.218934	-2.16692		+	8.75451e-05	4.05777	0.00390497	-0.492941	-4.0986		+	0.917041	0.0376114	0.946941	-0.0088914	-0.104397			11.6927	12.6447	13.3732	13.3221	13.3834	13.5756	13.7533	13.2046	13.3165	13.5989	13.4435	13.2352	13.3723	13.7058	14.5637	13.2957	13.2607	12.4592
O43822	CFAP410	Cilia- and flagella-associated protein 410	Undefined	1	0	0.978123	0.0747938	0			0.370625	0.431065	0.389605	-0.610904	-1.14537			1	0	0.997459	0.444991	0			0.575848	0.239692	0.67841	-0.359282	-0.586671			NaN	NaN	NaN	NaN	NaN	9.97174	NaN	NaN	NaN	12.8772	NaN	NaN	NaN	NaN	NaN	NaN	NaN	NaN
P08603	CFH	Complement factor H	Undefined	0.00745058	2.12781	0.009688	0.464347	2.92274		+	0.0785878	1.10464	0.0833511	0.671219	1.81897			0.834206	0.0787266	0.9195	-0.0348418	-0.210343			0.400168	0.397758	0.503381	-0.260599	-0.847559			12.3398	13.3163	13.0324	12.7226	12.5638	13.2094	12.9674	12.728	12.9708	10.408	8.73161	10.2724	10.5486	10.0319	NaN	12.3549	6.7074	NaN
P23528	CFL1	Cofilin-1	Undefined	0.00832884	2.07942	0.0108231	-0.0907655	-2.79682		+	0.000429058	3.36748	0.000306353	-0.0872329	-3.76218		+	0.0779617	1.10812	0.29141	0.125064	1.78169			0.903077	0.0442752	0.936652	-0.00693833	-0.122049			18.4537	18.653	18.3255	17.866	18.2736	18.5663	18.4507	17.9857	18.1631	17.9519	18.0307	17.7082	18.3512	18.1908	18.0617	18.5627	18.0742	17.9624
Q9Y281	CFL2	Cofilin-2	Undefined	0.136363	0.865305	0.179463	-0.0649436	-1.52453			0.823887	0.0841323	0.844465	0.00648678	0.223674			1.04519e-10	9.98081	0	0.357937	7.25276		+	2.32799e-06	5.63302	9.1954e-06	0.218438	4.97747		+	17.2533	17.1813	16.7847	16.7767	16.9001	17.0845	17.0609	16.7917	16.775	16.7922	16.7794	16.6857	17.1693	17.0248	17.0953	17.0717	16.7726	16.6337
Q5T1J5	CHCHD2P9	Putative coiled-coil-helix-coiled-coil-helix domain-containing protein CHCHD2P9, mitochondrial	Undefined	0.0198757	1.70168	0.0270419	0.195648	2.44037		+	8.98035e-05	4.04671	4.37811e-05	0.284475	4.24696		+	0.340589	0.467769	0.602418	-0.141203	-0.957761			0.00347628	2.45888	0.00735563	-0.392748	-2.98503		+	14.1978	14.2029	14.1139	13.8132	13.056	13.9326	14.0716	13.7762	13.8464	13.6417	14.0667	14.1459	13.2261	13.0223	13.5499	13.05	13.5819	13.5276
Q9NX63	CHCHD3	MICOS complex subunit MIC19	Undefined	0.413448	0.383579	0.489643	0.0430765	0.827701			0.0854362	1.06836	0.0907779	0.0558625	1.75334			1.19411e-14	13.923	0	0.522049	9.11351		+	0.44833	0.348402	0.551507	-0.0414727	-0.760852			16.5395	16.5107	16.3008	15.9216	15.9175	16.2878	16.4476	16.0775	16.1046	16.1092	16.3025	16.3096	16.2298	15.9786	16.1986	16.0326	15.1959	16.0332
Q9BRQ6	CHCHD6	MICOS complex subunit MIC25	Undefined	0.139591	0.855143	0.183588	0.0820243	1.51169			0.948019	0.0231831	0.954629	0.00223417	0.0655105			0.0027126	2.56661	0.0429681	0.17119	3.07848		+	4.67842e-10	9.3299	0	-0.330808	-6.82199		+	15.1944	15.3206	15.1051	14.8468	14.7909	15.0626	15.2695	14.7403	14.9719	14.8718	14.9455	15.1654	15.0858	14.8705	15.1411	15.0505	15.4175	14.76
Q8NE62	CHDH	Choline dehydrogenase, mitochondrial	Undefined	1.38823e-09	8.85754	0	0.463872	8.13717		+	4.20659e-20	19.3761	0	0.49621	14.6547		+	0.877908	0.0565509	0.941327	-0.0143209	-0.154031			1.05026e-08	7.9787	0	0.496881	6.17847		+	14.6616	14.1791	13.5591	14.056	14.2641	14.0667	13.7773	14.0495	14.1543	14.6393	14.777	13.6768	14.0926	14.4535	13.6671	14.2255	13.9153	14.8159
P10645	CHGA	Chromogranin-A	Undefined	1.87549e-08	7.72689	0	0.512824	7.24034		+	1.72321e-13	12.7637	0	0.494356	9.854		+	0.00270946	2.56712	0.0429587	0.254061	3.07972		+	1.67286e-05	4.77654	4.95575e-05	0.343893	4.49967		+	13.7281	13.6406	13.6075	12.6205	13.6821	13.7321	13.3286	13.2876	13.2201	12.9598	13.2578	13.1641	13.8884	13.6637	12.8456	13.4987	13.4469	13.8033
P05060	CHGB	Secretogranin-1	Ex	3.58436e-06	5.44559	0	0.326771	5.49443		+	2.28733e-10	9.64067	0	0.316877	7.83917		+	0.000511524	3.29113	0.0142408	0.218871	3.59666		+	0.363255	0.439788	0.464699	0.0489991	0.912869			15.1175	15.2564	15.4322	14.9621	15.3014	15.0018	15.2108	15.1638	15.0003	15.0602	14.5853	15.1931	14.9443	14.7573	14.5136	14.9568	14.5812	14.6614
O00533	CHL1	Neural cell adhesion molecule L1-like protein	Undefined	0.952251	0.0212487	0.965198	-0.00339524	-0.0603114			0.000126352	3.89842	8.577e-05	0.142203	4.14321		+	0.00288753	2.53947	0.044692	0.209621	3.05795		+	0.000703748	3.15258	0.00158232	-0.203501	-3.48404		+	13.9856	14.4005	14.2333	14.1105	13.7859	13.999	14.439	14.1517	14.1979	13.8694	14.0959	14.0936	14.3736	14.0517	14.4079	14.0036	13.9643	13.8157
O43633	CHMP2A	Charged multivesicular body protein 2a	Undefined	3.40012e-08	7.46851	0	0.337776	7.03925		+	1.44873e-06	5.83901	0	0.410799	5.44061		+	0.000721931	3.1415	0.0179815	0.266872	3.49385		+	0.00803882	2.09481	0.015721	0.210561	2.69828		+	13.4496	13.3166	13.3635	12.9577	13.5555	13.2555	13.2906	12.7636	13.0197	12.8908	12.9853	12.928	13.5859	13.3482	13.0734	12.926	12.9817	12.9755
Q9UQN3	CHMP2B	Charged multivesicular body protein 2b	Undefined	0.839174	0.0761482	0.875879	-0.0190638	-0.204466			0.00132604	2.87744	0.000996855	0.145115	3.39376		+	5.61237e-06	5.25085	0.000456973	0.393526	4.80917		+	0.0490584	1.30929	0.0831971	0.119378	1.98953			13.3431	14.7044	14.1481	13.6932	13.3725	14.5341	14.6826	13.9838	14.0894	13.8262	14.0969	13.9385	14.2191	14.1727	14.1295	14.1018	13.7404	14.1707
Q9Y3E7	CHMP3	Charged multivesicular body protein 3	Undefined	0.997994	0.000872088	0.998167	0.000248061	0.00253223			0.00641331	2.19292	0.00562568	0.122771	2.84065		+	0.00476156	2.32225	0.061043	0.306415	2.89011			0.0175648	1.75536	0.0321196	0.184141	2.41004		+	12.5469	13.1533	12.6844	12.8259	12.6124	12.7089	12.8303	12.8298	12.8777	12.8005	12.7493	12.465	12.8795	13.1085	12.7872	12.8579	12.6802	13.2253
[truncated: 2,198 more rows]
[truncated: 222 more columns]

## Sheet: Supplementary Table 3
Supplementary Table 3. GO Terms MCI Plaque vs MCI Non-Plaque
Proteins	ONTOLOGY	ID	Description	pvalue	p.adjust	qvalue	geneID	Count
[truncated: 323 more rows]

## Sheet: Supplementary Table 4
Supplementary Table 4. GO Terms AD Plaque vs AD Non-Plaque
[truncated: 413 more rows]

## Sheet: Supplementary Table 5
Supplementary Table 5. GO Terms MCI Non-Plaque vs Control Non-Plaque
[truncated: 3 more rows]

[truncated: 8 more sheets: Supplementary Table 6, Supplementary Table 7, Supplementary Table 8, Supplementary Table 9, Supplementary Table 10, Supplementary Table 11, Supplementary Table 12, Supplementary Table 13]
